# Supplementary material for: Sugar modified pyrimido[4,5-b]indole nucleosides: synthesis and antiviral activity
Source: PubMed Central journal article supplement (PMC6084004; doi:10.1039/c7md00319f), 2017-08-25
Supplement: MD-008-C7MD00319F-s001.pdf [file MD-008-C7MD00319F-s001.pdf]

## Supporting information for

### **Sugar Modified Pyrimido[4,5-*b*]indole Nucleosides: Synthesis and Antiviral Activity**

Juraj Konč,<sup>[a]</sup> Michal Tichý,<sup>[a]</sup> Radek Pohl,<sup>[a]</sup> Jan Hodek,<sup>[a]</sup> Petr Džubák,<sup>[b]</sup> Marián Hajdúch,<sup>[b]</sup> and Michal Hocek\*<sup>[a],[c]</sup>

*[a] Institute of Organic Chemistry and Biochemistry, Czech Academy of Sciences, Flemingovo nam. 2, CZ-16610 Prague 6, Czech Republic. E-mail: hocek@uochb.cas.cz*

*[b] Institute of Molecular and Translational Medicine, Palacky University and University Hospital in Olomouc, Faculty of Medicine and Dentistry, Hněvotínská 5, CZ-775 15 Olomouc, Czech Republic*

*[c] Department of Organic Chemistry, Faculty of Science, Charles University in Prague, Hlavova 8, CZ-12843 Prague 2, Czech Republic.*

#### Contents:

1. Experimental section
2. HPLC purity of final compounds
3. Biological activity assays and modelling details
4. Copies of NMR spectra

# Experimental

## 1.1 General remarks

All the reagents and solvents were purchased from commercial suppliers and used as received. High pressure flash chromatography (HPFC) purifications were performed on ISCO Combiflash Rf 200 system with RediSep Rf Gold Silica Gel Disposable columns for normal-phase or Reverse Phase (C18) RediSep Rf columns for reversed-phase (RP) HPFC or on Biotage SP-1 apparatus with FLASH 25+M, FLASH 40+M for normal-phase or KP-C18-HS columns for reversed-phase (RP) HPFC. Monitoring of reactions was performed using TLC Silica gel 60 F254 plates, visualization with UV lamp (254 nm) or by a solution of 4-anisaldehyde in ethanol and 10% of sulfuric acid. NMR spectra were recorded on Bruker Avance 400 MHz spectrometer (400.1 MHz for  $^1\text{H}$  and 100.6 MHz for  $^{13}\text{C}$ ) or on Bruker Avance 500 MHz spectrometer (500 MHz for  $^1\text{H}$ , 125.7 MHz for  $^{13}\text{C}$  and 470.3 MHz for  $^{19}\text{F}$ , referenced to hexafluorobenzene [-163 ppm] as external standard), in  $\text{CDCl}_3$  (TMS was used as internal standard) or  $\text{DMSO-}d_6$  (referenced to the residual solvent signal 2.5 ppm for  $^1\text{H}$ , 39.7 ppm for  $^{13}\text{C}$ ). Chemical shifts are given in ppm ( $\delta$ -scale), coupling constants ( $J$ ) in Hz. Complete assignment of all NMR signals was performed using a combination of H,H-COSY, H,H-ROESY, H,C-HSQC and H,C-HMBC experiments. Low resolution mass spectra were measured on LCQ Fleet (Thermo Fisher Scientific) using electrospray ionization (ESI). High resolution mass spectra were measured on LTQ Orbitrap XL (Thermo Fisher Scientific). Melting points were measured on Stuart automatic melting point SMP40 and are uncorrected. IR spectra (wavenumbers in  $\text{cm}^{-1}$ ) were recorded on Bruker ALPHA FT-IR spectrometer using attenuated total reflection (ATR). Optical rotations were measured at 25 °C in DMSO on Autopol IV (Rudolps Research Analytical) polarimeter,  $[\alpha]_{\text{D}}^{20}$  values are given in  $10^{-1} \text{ deg}\cdot\text{cm}^2\cdot\text{g}^{-1}$ . Purity of all final compounds (unprotected nucleosides) was determined by analytical HPLC and clean NMR spectra. Analytical HPLC: Waters 600 Controller, Waters 2996 Photodiode Array Detector, Column: Gemini 5 $\mu$  C18 110A (250 $\times$ 4.60 mm, 5 micron), Eluent:  $\text{H}_2\text{O}/\text{MeCN}$ , Flow: 1mL/min.

### **General Procedure A: Aqueous Suzuki Cross-coupling Reaction.**

An argon-purged mixture of free nucleoside (1 eq.), the appropriate boronic acid (1.5 eq.), Na<sub>2</sub>CO<sub>3</sub> (3 eq.), Pd(OAc)<sub>2</sub> (0.05 eq.), and 3,3',3''-phosphanetriyltris-(benzenesulfonic acid) trisodium salt (TPPTS; 0.12 eq.) in H<sub>2</sub>O/MeCN (2:1) was stirred at 100 °C for the stated period of time. After cooling down, the mixture was neutralized by the addition of aqueous 1M HCl and diluted with MeOH (20 mL). Solvents were removed under reduced pressure and the residue was purified by RP-HPFC (C18 column, 10→100% MeOH in H<sub>2</sub>O). Final products were crystallized from H<sub>2</sub>O/MeOH mixtures.

### **General Procedure B: Zemplén Deprotection of Nucleosides**

Protected nucleosides were dissolved in MeOH (10 mL) and 1M solution of MeONa in MeOH (1 mL) was added. The mixture was stirred at r.t. for the stated period of time and solvent was evaporated under reduced pressure.

### **4,6-Dichloro-9-(3,5-di-*O*-benzoyl-2-deoxy-2-fluoro-β-D-arabinofuranosyl)-9*H*-pyrimido-[4,5-*b*]indole (7)**

Pyrimidoindole **5**<sup>1</sup> (1.0 g; 4.2 mmol) and finely grounded potassium hydroxide (0.71 g; 12.6 mmol) were suspended in MeCN (70 mL) and TDA-1 (1.34 mL; 4.2 mmol) was added. The mixture was stirred for 30 min at r.t. after which the crude bromose **6**<sup>2</sup> (5.12 g) in MeCN (55 mL) was added dropwise. The mixture was stirred for another 20 h at r.t., filtered through pad of celite and volatiles were removed under reduced pressure. The crude product was purified using HPFC (silica column, 0→30% EtOAc in hexane). Nucleoside **7** (1.24 g; 51%) was obtained as a yellowish solid: m.p. 158–163 °C; <sup>1</sup>H NMR (500.0 MHz, DMSO-*d*<sub>6</sub>): 4.75 (ddd, 1H, *J*<sub>4',3'</sub> = 5.9, *J*<sub>4',5'</sub> = 4.3, 2.9, H-4'); 4.80 (dd, 1H, *J*<sub>gem</sub> = 12.3, *J*<sub>5'b,4'</sub> = 4.3, H-5'b); 4.94 (dd, 1H, *J*<sub>gem</sub> = 12.3, *J*<sub>5'a,4'</sub> = 2.9, H-5'a); 5.83 (ddd, 1H, *J*<sub>H,F</sub> = 51.1, *J*<sub>2',1'</sub> = 4.1, *J*<sub>2',3'</sub> = 1.9, H-2'); 5.99 (ddd, 1H, *J*<sub>H,F</sub> = 22.5, *J*<sub>3',4'</sub> = 5.9, *J*<sub>3',2'</sub> = 1.9, H-3'); 7.13 (dd, 1H, *J*<sub>7,8</sub> = 8.9, *J*<sub>7,5</sub> = 2.2, H-7); 7.17 (dd, 1H, *J*<sub>H,F</sub> = 21.4, *J*<sub>1',2'</sub> = 4.1, H-1'); 7.57, 7.60 (2 × m, 2 × 2H, H-*m*-Bz); 7.72, 7.74 (2 × m, 2 × 1H, H-*p*-Bz); 7.97 (ddd, 1H, *J*<sub>8,7</sub> = 8.9, *J*<sub>H,F</sub> = 3.2, *J*<sub>8,5</sub> = 0.5, H-8); 8.07, 8.12 (2 × m, 2 × 2H, H-*o*-Bz); 8.26 (dd, 1H, *J*<sub>5,7</sub> = 2.1, *J*<sub>5,8</sub> = 0.5, H-5); 8.93 (s, 1H, H-2); <sup>13</sup>C NMR (125.7 MHz, DMSO-*d*<sub>6</sub>): 63.16 (CH<sub>2</sub>-5'); 76.62 (d, *J*<sub>C,F</sub> = 28.6, CH-3'); 77.70 (d, *J*<sub>C,F</sub> = 2.5, CH-4'); 83.14 (d, *J*<sub>C,F</sub> = 17.5, CH-1'); 95.38 (d, *J*<sub>C,F</sub> = 193.2, CH-2'); 111.07 (C-4a); 116.37 (d, *J*<sub>C,F</sub> = 6.0, CH-8); 119.65 (C-4b); 121.50 (CH-5); 127.26 (C-6); 128.01 (CH-7); 128.89 (C-*i*-Bz); 128.99, 129.07 (CH-*m*-Bz); 129.45 (CH-*o*-Bz); 129.47 (C-*i*-Bz); 129.87 (CH-*o*-Bz); 133.87, 134.15 (CH-*p*-Bz); 137.14 (C-8a); 152.51 (C-4); 154.80 (CH-2); 155.51 (C-9a); 165.18, 165.54 (CO-Bz); <sup>19</sup>F{<sup>1</sup>H} NMR (470.3 MHz, DMSO-*d*<sub>6</sub>): -189.41; IR (ATR): ν =

1716, 1273, 1114, 1096, 1071, 1029, 709  $\text{cm}^{-1}$ ; ESI MS  $m/z$  (rel.%): 602.0 (100)  $[\text{M}+\text{Na}]^+$ ; HR MS (ESI) for  $\text{C}_{29}\text{H}_{21}\text{Cl}_2\text{FN}_3\text{O}_5$   $[\text{M}+\text{H}]^+$ : calcd 580.08357; found 580.08368.

**6-Chloro-9-(3,5-di-*O*-benzoyl-2-deoxy-2-fluoro- $\beta$ -D-arabinofuranosyl)-4-methyl-9H-pyrimido[4,5-*b*]indole (8d)**

Protected nucleoside **7** (300 mg; 0.52 mmol) and  $\text{Pd}(\text{PPh}_3)_4$  (30 mg; 0.03 mmol) were dissolved in anhydrous THF (10 mL) and  $(\text{Me})_3\text{Al}$  (520  $\mu\text{L}$ , 2M in toluene) was added. The mixture was stirred at 70  $^\circ\text{C}$  for 18 h. Solvents were removed under reduced pressure and the crude product was purified using HPFC (silica column, 0 $\rightarrow$ 40% EtOAc in hexane) to give compound **8d** (135 mg; 46%) as a yellowish solid: m.p. 139–146  $^\circ\text{C}$ ;  $^1\text{H}$  NMR (500.0 MHz,  $\text{DMSO-}d_6$ ): 2.99 (s, 3H,  $\text{CH}_3$ ); 4.73 (ddd, 1H,  $J_{4',3'} = 6.1$ ,  $J_{4',5'} = 4.3$ , 2.9, H-4'); 4.79 (dd, 1H,  $J_{\text{gem}} = 12.3$ ,  $J_{5'b,4'} = 4.3$ , H-5'b); 4.94 (dd, 1H,  $J_{\text{gem}} = 12.3$ ,  $J_{5'a,4'} = 2.9$ , H-5'a); 5.82 (ddd, 1H,  $J_{\text{H,F}} = 51.4$ ,  $J_{2',1'} = 4.3$ ,  $J_{2',3'} = 2.0$ , H-2'); 6.00 (ddd, 1H,  $J_{\text{H,F}} = 22.7$ ,  $J_{3',4'} = 6.1$ ,  $J_{3',2'} = 2.0$ , H-3'); 7.05 (dd, 1H,  $J_{7,8} = 8.9$ ,  $J_{7,5} = 2.2$ , H-7); 7.17 (dd, 1H,  $J_{\text{H,F}} = 21.4$ ,  $J_{1',2'} = 4.3$ , H-1'); 7.53–7.65 (m, 4H, H-*m*-Bz); 7.73, 7.74 ( $2 \times$  m,  $2 \times$  1H, H-*p*-Bz); 7.93 (dd, 1H,  $J_{8,7} = 8.9$ ,  $J_{\text{H,F}} = 3.6$ , H-8); 8.08, 8.12 ( $2 \times$  m,  $2 \times$  2H, H-*o*-Bz); 8.21 (d, 1H,  $J_{5,7} = 2.2$ , H-5); 8.99 (s, 1H, H-2);  $^{13}\text{C}$  NMR (125.7 MHz,  $\text{DMSO-}d_6$ ): 22.48 ( $\text{CH}_3$ ); 63.16 ( $\text{CH}_2$ -5'); 76.71 (d,  $J_{\text{C,F}} = 28.5$ , CH-3'); 77.48 (d,  $J_{\text{C,F}} = 3.5$ , CH-4'); 82.80 (d,  $J_{\text{C,F}} = 17.6$ , CH-1'); 95.50 (d,  $J_{\text{C,F}} = 193.1$ , CH-2'); 111.56 (C-4a); 115.96 (d,  $J_{\text{C,F}} = 6.2$ , CH-8); 121.32 (C-4b); 122.35 (CH-5); 126.90 (C-6); 126.94 (CH-7); 128.92 (C-*i*-Bz); 129.02, 129.11 (CH-*m*-Bz); 129.48 (CH-*o*-Bz); 129.49 (C-*i*-Bz); 129.90 (CH-*o*-Bz); 133.91, 134.18 (CH-*p*-Bz); 136.87 (C-8a); 154.06 (CH-2); 154.51 (C-9a); 160.70 (C-4); 165.21, 165.66 (CO-Bz);  $^{19}\text{F}$  NMR (470.3 MHz,  $\text{DMSO-}d_6$ ): -189.50 (ddd,  $J_{\text{F,H}2'} = 51.4$ ,  $J_{\text{F,H}3'} = 22.7$ ,  $J_{\text{F,H}1'} = 21.4$ ); IR (ATR):  $\nu = 1721$ , 1477, 1454, 1264, 1164, 1115, 1101, 1072, 1043, 1031, 711  $\text{cm}^{-1}$ ; ESI MS  $m/z$  (rel.%): 560.0 (57)  $[\text{M}+\text{H}]^+$ , 582.0 (100)  $[\text{M}+\text{Na}]^+$ ; HR MS (ESI) for  $\text{C}_{30}\text{H}_{24}\text{ClFN}_3\text{O}_5$   $[\text{M}+\text{H}]^+$ : calcd 560.13830; found 560.13841.

**6-Chloro-9-(3,5-di-*O*-benzoyl-2-deoxy-2-fluoro- $\beta$ -D-arabinofuranosyl)-4-(furan-2-yl)-9H-pyrimido[4,5-*b*]indole (8e)**

Protected nucleoside **7** (300 mg; 0.52 mmol), 2-(tributylstannyl)furan (270 mg; 0.63 mmol) and  $\text{PdCl}_2(\text{PPh}_3)_2$  (18.2 mg; 0.03 mmol) were dissolved in anhydrous DMF (10 mL) and heated to 100  $^\circ\text{C}$  for 18 h. Solvent was co-evaporated with toluene under reduced pressure. Crude product was purified using column chromatography on silica column containing 15% of KF. Column was first washed with 3 L of hexane and the product was then eluted with 20% EtOAc in hexane. Desired product **8e** (249 mg; 79%) was obtained as a yellow foam:  $^1\text{H}$  NMR (500.0 MHz,  $\text{DMSO-}d_6$ ): 4.73 (ddd, 1H,  $J_{4',3'} = 6.0$ ,  $J_{4',5'} = 4.1$ , 2.9, H-4'); 4.80 (dd, 1H,  $J_{\text{gem}} = 12.3$ ,  $J_{5'b,4'} = 4.1$ , H-5'b);



4.95 (dd, 1H,  $J_{\text{gem}} = 12.3$ ,  $J_{5'a,4'} = 2.9$ , H-5'a); 5.82 (ddd, 1H,  $J_{\text{H,F}} = 51.3$ ,  $J_{2',1'} = 4.2$ ,  $J_{2',3'} = 1.8$ , H-2'); 5.99 (ddd, 1H,  $J_{\text{H,F}} = 22.7$ ,  $J_{3',4'} = 6.0$ ,  $J_{3',2'} = 1.8$ , H-3'); 6.89 (dd, 1H,  $J_{4,3} = 3.5$ ,  $J_{4,5} = 1.7$ , H-4-furyl); 6.99 (ddd, 1H,  $J_{7,8} = 8.9$ ,  $J_{7,5} = 2.2$ ,  $J_{\text{H,F}} = 1.3$ , H-7); 7.21 (dd, 1H,  $J_{\text{H,F}} = 22.2$ ,  $J_{1',2'} = 4.2$ , H-1'); 7.56–7.62 (m, 5H, H-3-furyl, H-*m*-Bz); 7.71–7.76 (m, 2H, H-*p*-Bz); 7.93 (dd, 1H,  $J_{8,7} = 8.9$ ,  $J_{\text{H,F}} = 3.7$ , H-8); 8.09, 8.12 (2 × m, 2 × 2H, H-*o*-Bz); 8.34 (dd, 1H,  $J_{5,4} = 1.7$ ,  $J_{5,3} = 0.9$ , H-5-furyl); 8.74 (d, 1H,  $J_{5,7} = 2.2$ , H-5); 8.99 (s, 1H, H-2);  $^{13}\text{C}$  NMR (125.7 MHz, DMSO- $d_6$ ): 63.17 (CH<sub>2</sub>-5'); 76.77 (d,  $J_{\text{C,F}} = 28.7$ , CH-3'); 77.63 (d,  $J_{\text{C,F}} = 3.2$ , CH-4'); 82.95 (d,  $J_{\text{C,F}} = 17.6$ , CH-1'); 95.54 (d,  $J_{\text{C,F}} = 193.2$ , CH-2'); 106.95 (C-4a); 113.35 (CH-4-furyl); 115.76 (d,  $J_{\text{C,F}} = 4.8$ , CH-8); 115.78 (CH-3-furyl); 120.68 (C-4b); 123.59 (CH-5); 126.66 (C-6); 127.17 (CH-7); 128.94 (C-*i*-Bz); 129.04, 129.13 (CH-*m*-Bz); 129.51 (CH-*o*-Bz); 129.52 (C-*i*-Bz); 129.92 (CH-*o*-Bz); 133.93, 134.19 (CH-*p*-Bz); 137.33 (C-8a); 147.15 (CH-5-furyl); 148.10 (C-4); 152.22 (C-2-furyl); 154.57 (CH-2); 156.29 (C-9a); 165.24, 165.70 (CO-Bz);  $^{19}\text{F}$  NMR (470.3 MHz, DMSO- $d_6$ ): -189.28 (ddd,  $J_{\text{F,H}2'} = 51.3$ ,  $J_{\text{F,H}3'} = 22.7$ ,  $J_{\text{F,H}1'} = 22.2$ ); IR (ATR):  $\nu = 2933, 2863, 1723, 1566, 1543, 1462, 1439, 1265, 1252, 1090, 1071, 1029, 710 \text{ cm}^{-1}$ ; ESI MS  $m/z$  (rel.%): 612.2 (70) [M+H]<sup>+</sup>, 634.2 (100) [M+Na]<sup>+</sup>; HR MS (ESI) for C<sub>33</sub>H<sub>24</sub>ClFN<sub>3</sub>O<sub>6</sub> [M+H]<sup>+</sup>: calcd 612.13322; found 612.13335.

### 6-Chloro-9-(3,5-di-*O*-benzoyl-2-deoxy-2-fluoro- $\beta$ -D-arabinofuranosyl)-4-(furan-3-yl)-9H-pyrimido[4,5-*b*]indole (8f)

Protected nucleoside **7** (250 mg; 0.43 mmol), furan-3-boronic acid (73 mg; 0.65 mmol), K<sub>2</sub>CO<sub>3</sub> (120 mg; 0.86 mmol) and Pd(PPh<sub>3</sub>)<sub>4</sub> (25 mg; 0.02 mmol) were dissolved in toluene (10 mL) and heated to 100 °C for 18 h. More furan-3-boronic acid (150 mg; 1.34 mmol) and Pd(PPh<sub>3</sub>)<sub>4</sub> (45 mg; 0.04 mmol) was added and heating continued for another 2 days. Reaction mixture was diluted with water and extracted with chloroform. Organic layer was washed with saturated NH<sub>4</sub>Cl and water and dried over MgSO<sub>4</sub>. Solvent was evaporated under reduced pressure and the crude product was purified using HPFC (silica column, 0→40% EtOAc in hexane) to give compound **8f** (200 mg; 77%) as a yellow foam:  $^1\text{H}$  NMR (500.0 MHz, DMSO- $d_6$ ): 4.74 (ddd, 1H,  $J_{4',3'} = 6.0$ ,  $J_{4',5'} = 4.2, 2.9$ , H-4'); 4.79 (dd, 1H,  $J_{\text{gem}} = 12.3$ ,  $J_{5'b,4'} = 4.2$ , H-5'b); 4.95 (dd, 1H,  $J_{\text{gem}} = 12.3$ ,  $J_{5'a,4'} = 2.9$ , H-5'a); 5.84 (ddd, 1H,  $J_{\text{H,F}} = 51.3$ ,  $J_{2',1'} = 4.3$ ,  $J_{2',3'} = 1.9$ , H-2'); 6.00 (ddd, 1H,  $J_{\text{H,F}} = 22.6$ ,  $J_{3',4'} = 6.0$ ,  $J_{3',2'} = 1.9$ , H-3'); 7.01 (dd, 1H,  $J_{7,8} = 8.9$ ,  $J_{7,5} = 2.2$ , H-7); 7.13 (dd, 1H,  $J_{4,5} = 1.9$ ,  $J_{4,2} = 0.9$ , H-4-furyl); 7.22 (dd, 1H,  $J_{\text{H,F}} = 21.7$ ,  $J_{1',2'} = 4.2$ , H-1'); 7.53–7.65 (m, 4H, H-*m*-Bz); 7.73, 7.74 (2 × m, 2 × 1H, H-*p*-Bz); 7.94 (m, 1H, H-8); 8.01 (dd, 1H,  $J_{5,4} = 1.9$ ,  $J_{5,2} = 1.5$ , H-5-furyl); 8.06 (d, 1H,  $J_{5,7} = 2.2$ , H-5); 8.08, 8.12 (2 × m, 2 × 2H, H-*o*-Bz); 8.56 (dd, 1H,  $J_{2,5} = 1.5$ ,  $J_{2,4} = 0.9$ , H-2-furyl); 9.05 (s, 1H, H-2);  $^{13}\text{C}$  NMR (125.7 MHz, DMSO- $d_6$ ): 63.19 (CH<sub>2</sub>-5'); 76.78 (d,  $J_{\text{C,F}} = 28.5$ , CH-3'); 77.61 (d,  $J_{\text{C,F}} = 3.3$ , CH-4'); 82.91 (d,  $J_{\text{C,F}} = 17.6$ , CH-1'); 95.59 (d,  $J_{\text{C,F}} = 193.2$ ,

CH-2'); 110.15 (C-4a); 110.78 (CH-4-furyl); 116.12 (d,  $J_{C,F} = 6.6$ , CH-8); 120.80 (C-4b); 121.51 (CH-5); 124.28 (C-3-furyl); 126.46 (C-6); 127.22 (CH-7); 128.97 (C-*i*-Bz); 129.10, 129.18 (CH-*m*-Bz); 129.55 (CH-*o*-Bz, C-*i*-Bz); 129.97 (CH-*o*-Bz); 133.99, 134.26 (CH-*p*-Bz); 137.12 (C-8a); 144.76 (CH-2-furyl); 145.03 (CH-5-furyl); 153.44 (C-4); 154.93 (CH-2); 155.64 (C-9a); 165.30, 165.74 (CO-Bz);  $^{19}\text{F}$  NMR (470.3 MHz, DMSO- $d_6$ ): -189.44 (ddd,  $J_{F,H2'} = 51.3$ ,  $J_{F,H3'} = 22.6$ ,  $J_{F,H1'} = 21.7$ ); IR (ATR):  $\nu = 1723, 1564, 1546, 1441, 1267, 1096, 1071, 803, 711 \text{ cm}^{-1}$ ; ESI MS  $m/z$  (rel.%): 612.0 (44)  $[\text{M}+\text{H}]^+$ , 634.0 (100)  $[\text{M}+\text{Na}]^+$ ; HR MS (ESI) for  $\text{C}_{33}\text{H}_{24}\text{ClFN}_3\text{O}_6$   $[\text{M}+\text{H}]^+$ : calcd 612.13322; found 612.13348.

### **6-Chloro-9-(3,5-di-*O*-benzoyl-2-deoxy-2-fluoro- $\beta$ -D-arabinofuranosyl)-4-(thiophen-2-yl)-9*H*-pyrimido[4,5-*b*]indole (8g)**

Protected nucleoside **7** (350 mg; 0.60 mmol), 2-(tributylstannyl)thiophene (270 mg; 0.72 mmol) and  $\text{PdCl}_2(\text{PPh}_3)_2$  (21 mg; 0.03 mmol) were dissolved in anhydrous DMF (10 mL) and heated to 100 °C for 17 h. Solvent was co-evaporated with toluene under reduced pressure. Crude product was purified using column chromatography on silica column containing 15% of KF. Column was first washed with 3 L of PE and the product was then eluted with 20% EtOAc in PE. Desired product **8g** (194 mg; 51%) was obtained as a white foam:  $^1\text{H}$  NMR (500.0 MHz, DMSO- $d_6$ ): 4.75 (ddd, 1H,  $J_{4',3'} = 5.9$ ,  $J_{4',5'} = 4.2$ , 2.9, H-4'); 4.80 (dd, 1H,  $J_{\text{gem}} = 12.3$ ,  $J_{5'b,4'} = 4.2$ , H-5'b); 4.95 (dd, 1H,  $J_{\text{gem}} = 12.3$ ,  $J_{5'a,4'} = 2.9$ , H-5'a); 5.85 (ddd, 1H,  $J_{H,F} = 51.3$ ,  $J_{2',1'} = 4.2$ ,  $J_{2',3'} = 1.8$ , H-2'); 6.00 (ddd, 1H,  $J_{H,F} = 22.6$ ,  $J_{3',4'} = 5.9$ ,  $J_{3',2'} = 1.8$ , H-3'); 7.02 (ddd, 1H,  $J_{7,8} = 8.9$ ,  $J_{7,5} = 2.2$ ,  $J_{H,F} = 0.7$ , H-7); 7.23 (dd, 1H,  $J_{H,F} = 22.2$ ,  $J_{1',2'} = 4.2$ , H-1'); 7.42 (dd, 1H,  $J_{4,3} = 5.0$ ,  $J_{4,5} = 3.7$ , H-4-thienyl); 7.58, 7.61 (2  $\times$  m, 2  $\times$  2H, H-*m*-Bz); 7.73, 7.74 (2  $\times$  m, 2  $\times$  1H, H-*p*-Bz); 7.96 (dd, 1H,  $J_{8,7} = 8.9$ ,  $J_{H,F} = 3.7$ , H-8); 8.01 (dd, 1H,  $J_{3,4} = 5.0$ ,  $J_{3,5} = 1.1$ , H-3-thienyl); 8.07–8.10 (m, 3H, H-5-thienyl, H-*o*-Bz); 8.13 (m, 2H, H-*o*-Bz); 8.20 (d, 1H,  $J_{5,7} = 2.2$ , H-5); 9.03 (s, 1H, H-2);  $^{13}\text{C}$  NMR (125.7 MHz, DMSO- $d_6$ ): 63.17 (CH<sub>2</sub>-5'); 76.74 (d,  $J_{C,F} = 28.6$ , CH-3'); 77.62 (d,  $J_{C,F} = 3.1$ , CH-4'); 82.96 (d,  $J_{C,F} = 17.6$ , CH-1'); 95.55 (d,  $J_{C,F} = 193.1$ , CH-2'); 108.80 (C-4a); 116.21 (d,  $J_{C,F} = 6.4$ , CH-8); 120.67 (C-4b); 121.19 (CH-5); 126.37 (C-6); 127.35 (CH-7); 128.77 (CH-4-thienyl); 128.94 (C-*i*-Bz); 129.04, 129.13 (CH-*m*-Bz); 129.50 (CH-*o*-Bz, C-*i*-Bz); 129.92 (CH-*o*-Bz); 130.26 (CH-5-thienyl); 131.86 (CH-3-thienyl); 133.93, 134.20 (CH-*p*-Bz); 137.18 (C-8a); 140.83 (C-2-thienyl); 153.67 (C-4); 154.63 (CH-2); 156.03 (C-9a); 165.23, 165.68 (CO-Bz);  $^{19}\text{F}$  NMR (470.3 MHz, DMSO- $d_6$ ): -189.30 (ddd,  $J_{F,H2'} = 51.3$ ,  $J_{F,H3'} = 22.6$ ,  $J_{F,H1'} = 22.2$ ); IR (ATR):  $\nu = 1716, 1556, 1462, 1438, 1262, 1118, 1064, 999, 805, 709 \text{ cm}^{-1}$ ; ESI MS  $m/z$  (rel. %): 650 (100)  $[\text{M}+\text{Na}]^+$ , 628 (50)  $[\text{M}+\text{H}]^+$ ; HR MS (ESI) for  $\text{C}_{33}\text{H}_{23}\text{ClFN}_3\text{O}_5\text{NaS}$   $[\text{M}+\text{Na}]^+$ : calcd 650.09232; found 650.09235.

**6-Chloro-9-(3,5-di-*O*-benzoyl-2-deoxy-2-fluoro- $\beta$ -D-arabino-furanosyl)-4-(thiophen-3-yl)-9*H*-pyrimido[4,5-*b*]indole (8h)**

Protected nucleoside **7** (325 mg; 0.56 mmol), thiophene-3-boronic acid (107 mg; 0.84 mmol), K<sub>2</sub>CO<sub>3</sub> (155 mg; 1.12 mmol) and Pd(PPh<sub>3</sub>)<sub>4</sub> (33 mg; 0.03 mmol) were dissolved in toluene (10 mL) and heated to 100 °C for 17 h. Reaction mixture was diluted with water and extracted with chloroform. Organic layer was washed with saturated NH<sub>4</sub>Cl and water and dried over MgSO<sub>4</sub>. Solvent was evaporated under reduced pressure and the crude product was purified using HPFC (silica column, 0→50% EtOAc in PE) to give compound **8h** (200 mg; 53%) as a yellow foam: <sup>1</sup>H NMR (500.0 MHz, DMSO-*d*<sub>6</sub>): 4.74 (ddd, 1H, *J*<sub>4',3'</sub> = 6.0, *J*<sub>4',5'</sub> = 4.2, 2.9, H-4'); 4.80 (dd, 1H, *J*<sub>gem</sub> = 12.3, *J*<sub>5'b,4'</sub> = 4.2, H-5'b); 4.95 (dd, 1H, *J*<sub>gem</sub> = 12.3, *J*<sub>5'a,4'</sub> = 2.9, H-5'a); 5.85 (ddd, 1H, *J*<sub>H,F</sub> = 51.3, *J*<sub>2',1'</sub> = 4.2, *J*<sub>2',3'</sub> = 1.9, H-2'); 6.01 (ddd, 1H, *J*<sub>H,F</sub> = 22.6, *J*<sub>3',4'</sub> = 6.0, *J*<sub>3',2'</sub> = 1.9, H-3'); 7.00 (dd, 1H, *J*<sub>7,8</sub> = 8.9, *J*<sub>7,5</sub> = 2.2, H-7); 7.23 (dd, 1H, *J*<sub>H,F</sub> = 21.9, *J*<sub>1',2'</sub> = 4.2, H-1'); 7.58, 7.61 (2 × m, 2 × 2H, H-*m*-Bz); 7.67 (dd, 1H, *J*<sub>4,5</sub> = 5.0, *J*<sub>4,2</sub> = 1.3, H-4-thienyl); 7.73, 7.74 (2 × m, 2 × 1H, H-*p*-Bz); 7.88 (dd, 1H, *J*<sub>5,4</sub> = 5.0, *J*<sub>5,2</sub> = 2.9, H-5-thienyl); 7.91 (d, 1H, *J*<sub>5,7</sub> = 2.2, H-5); 7.94 (dd, 1H, *J*<sub>8,7</sub> = 8.9, *J*<sub>H,F</sub> = 3.7, H-8); 8.08, 8.13 (2 × m, 2 × 2H, H-*o*-Bz); 8.34 (dd, 1H, *J*<sub>2,5</sub> = 2.9, *J*<sub>2,4</sub> = 1.3, H-2-thienyl); 9.07 (s, 1H, H-2); <sup>13</sup>C NMR (125.7 MHz, DMSO-*d*<sub>6</sub>): 63.18 (CH<sub>2</sub>-5'); 76.76 (d, *J*<sub>C,F</sub> = 28.6, CH-3'); 77.59 (d, *J*<sub>C,F</sub> = 3.3, CH-4'); 82.90 (d, *J*<sub>C,F</sub> = 17.7, CH-1'); 95.57 (d, *J*<sub>C,F</sub> = 193.1, CH-2'); 110.06 (C-4a); 116.14 (d, *J*<sub>C,F</sub> = 6.6, CH-8); 120.87 (C-4b); 121.32 (CH-5); 126.29 (C-6); 127.19 (CH-7); 128.00 (CH-5-thienyl); 128.20 (CH-4-thienyl); 128.92 (CH-2-thienyl); 128.95 (C-*i*-Bz); 129.06, 129.14 (CH-*m*-Bz); 129.51 (CH-*o*-Bz, C-*i*-Bz); 129.94 (CH-*o*-Bz); 133.94, 134.21 (CH-*p*-Bz); 137.15 (C-8a); 139.00 (C-3-thienyl); 154.88 (CH-2); 155.74 (C-9a); 155.82 (C-4); 165.25, 165.70 (CO-Bz); <sup>19</sup>F NMR (470.3 MHz, DMSO-*d*<sub>6</sub>): -189.36 (ddd, *J*<sub>F,H2'</sub> = 51.3, *J*<sub>F,H3'</sub> = 22.6, *J*<sub>F,H1'</sub> = 21.9); IR (ATR):  $\nu$  = 2946, 1719, 1567, 1438, 1254, 1161, 1068, 1027, 839, 794, 707 cm<sup>-1</sup>; ESI MS *m/z* (rel. %): 628 (100) [M+H]<sup>+</sup>, 650 (54) [M+Na]<sup>+</sup>; HR MS (ESI) for C<sub>33</sub>H<sub>24</sub>ClFN<sub>3</sub>O<sub>5</sub>S [M+H]<sup>+</sup>: calcd 628.11037; found 628.11051.

**6-Chloro-9-(3,5-di-*O*-benzoyl-2-deoxy-2-fluoro- $\beta$ -D-arabinofuranosyl)-4-phenyl-9*H*-pyrimido[4,5-*b*]indole (8i)**

Protected nucleoside **7** (335 mg; 0.58 mmol), phenylboronic acid (106 mg; 0.87 mmol), K<sub>2</sub>CO<sub>3</sub> (160 mg; 1.16 mmol) and Pd(PPh<sub>3</sub>)<sub>4</sub> (34 mg; 0.03 mmol) were dissolved in toluene (10 mL) and heated to 100 °C for 17 h. The mixture was diluted with water and extracted with chloroform. Organic layer was washed with saturated NH<sub>4</sub>Cl and water and dried over MgSO<sub>4</sub>. Solvent was evaporated under reduced pressure and crude product was purified using HPFC (silica column, 0→50% EtOAc in PE) to give compound **8i** (200 mg; 55%) as a yellow foam: <sup>1</sup>H NMR (500.0

MHz, DMSO-*d*<sub>6</sub>): 4.75 (ddd, 1H,  $J_{4',3'} = 6.0$ ,  $J_{4',5'} = 4.2$ , 2.9, H-4'); 4.80 (dd, 1H,  $J_{\text{gem}} = 12.3$ ,  $J_{5'b,4'} = 4.2$ , H-5'b); 4.95 (dd, 1H,  $J_{\text{gem}} = 12.3$ ,  $J_{5'a,4'} = 2.9$ , H-5'a); 5.86 (ddd, 1H,  $J_{\text{H,F}} = 51.3$ ,  $J_{2',1'} = 4.2$ ,  $J_{2',3'} = 1.9$ , H-2'); 6.02 (ddd, 1H,  $J_{\text{H,F}} = 22.6$ ,  $J_{3',4'} = 6.0$ ,  $J_{3',2'} = 1.9$ , H-3'); 7.00 (dd, 1H,  $J_{7,8} = 8.9$ ,  $J_{7,5} = 2.2$ , H-7); 7.25 (dd, 1H,  $J_{\text{H,F}} = 21.8$ ,  $J_{1',2'} = 4.2$ , H-1'); 7.58, 7.61 (2 × m, 2 × 2H, H-*m*-Bz); 7.65 (d, 1H,  $J_{5,7} = 2.2$ , H-5); 7.66–7.77 (m, 5H, H-*p*-Bz, H-*m,p*-Ph); 7.90 (m, 2H, H-*o*-Ph); 7.95 (dd, 1H,  $J_{8,7} = 8.9$ ,  $J_{\text{H,F}} = 3.7$ , H-8); 8.08, 8.14 (2 × m, 2 × 2H, H-*o*-Bz); 9.13 (s, 1H, H-2); <sup>13</sup>C NMR (125.7 MHz, DMSO-*d*<sub>6</sub>): 63.19 (CH<sub>2</sub>-5'); 76.75 (d,  $J_{\text{C,F}} = 28.6$ , CH-3'); 77.59 (d,  $J_{\text{C,F}} = 3.3$ , CH-4'); 82.90 (d,  $J_{\text{C,F}} = 17.6$ , CH-1'); 95.55 (d,  $J_{\text{C,F}} = 193.1$ , CH-2'); 110.27 (C-4a); 116.23 (d,  $J_{\text{C,F}} = 6.5$ , CH-8); 120.80 (C-4b); 121.09 (CH-5); 126.19 (C-6); 127.24 (CH-7); 128.94 (C-*i*-Bz); 128.97 (CH-*o*-Ph); 129.04, 129.09, 129.11 (CH-*m*-Ph, CH-*m*-Bz); 129.49 (CH-*o*-Bz); 129.50 (C-*i*-Bz); 129.92 (CH-*o*-Bz); 130.80 (CH-*p*-Ph); 133.92, 134.20 (CH-*p*-Bz); 137.20 (C-8a); 137.51 (C-*i*-Ph); 154.98 (CH-2); 155.65 (C-9a); 160.50 (C-4); 165.23, 165.67 (CO-Bz); <sup>19</sup>F NMR (470.3 MHz, DMSO-*d*<sub>6</sub>): -189.31 (ddd,  $J_{\text{F,H}2'} = 51.3$ ,  $J_{\text{F,H}3'} = 22.6$ ,  $J_{\text{F,H}1'} = 21.8$ ); IR (ATR):  $\nu = 1711$ , 1557, 1447, 1435, 1263, 1167, 1111, 1093, 1069, 1027, 821, 705 cm<sup>-1</sup>; ESI MS *m/z* (rel. %): 622 (100) [M+H], 644 (24) [M+Na]; HR MS (ESI) for C<sub>35</sub>H<sub>26</sub>ClFN<sub>3</sub>O<sub>5</sub> [M+H]<sup>+</sup>: calcd 622.15395; found 622.15408.

#### **4-Amino-6-chloro-9-(2-deoxy-2-fluoro- $\beta$ -D-arabinofuranosyl)-9H-pyrimido-[4,5-*b*]indole (9a)**

Nucleoside **7** (300 mg; 0.52 mmol) was dissolved in dioxane (2 mL) and 30% aqueous ammonia (6 mL) was added. Mixture was stirred in screw-cap pressure glass tube at 100 °C for 2 days. Volatiles were removed under reduced pressure and the crude product was purified using HPFC (silica column, 0→20% MeOH in DCM) and recrystallized from a H<sub>2</sub>O/MeOH mixture to give compound **9a** (145 mg; 78%) as white crystals: m.p. 267–272 °C;  $[\alpha]_{\text{D}}^{20} +40.1$  (c 0.30, DMSO); <sup>1</sup>H NMR (499.8 MHz, DMSO-*d*<sub>6</sub>): 3.73–3.85 (m, 3H, H-4',5'); 4.46 (dddd, 1H,  $J_{\text{H,F}} = 23.5$ ,  $J_{3',4'} = 5.5$ ,  $J_{3',\text{OH}} = 5.3$ ,  $J_{3',2'} = 2.4$ , H-3'); 5.14 (ddd, 1H,  $J_{\text{H,F}} = 53.3$ ,  $J_{2',1'} = 4.4$ ,  $J_{2',3'} = 2.4$ , H-2'); 5.17 (t, 1H,  $J_{\text{OH},5'} = 5.5$ , OH-5'); 5.92 (d, 1H,  $J_{\text{OH},3'} = 5.3$ , OH-3'); 6.84 (dd, 1H,  $J_{\text{H,F}} = 21.1$ ,  $J_{1',2'} = 4.4$ , H-1'); 7.35 (dd, 1H,  $J_{7,8} = 8.8$ ,  $J_{7,5} = 2.1$ , H-7); 7.47 (bs, 2H, NH<sub>2</sub>); 7.87 (dd, 1H,  $J_{8,7} = 8.8$ ,  $J_{\text{H,F}} = 3.1$ , H-8); 8.33 (s, 1H, H-2); 8.46 (d, 1H,  $J_{5,7} = 2.1$ , H-5); <sup>13</sup>C NMR (125.7 MHz, DMSO-*d*<sub>6</sub>): 60.33 (CH<sub>2</sub>-5'); 74.29 (d,  $J_{\text{C,F}} = 24.1$ , CH-3'); 82.52 (d,  $J_{\text{C,F}} = 17.6$ , CH-1'); 82.95 (d,  $J_{\text{C,F}} = 4.6$ , CH-4'); 94.86 (C-4a); 98.14 (d,  $J_{\text{C,F}} = 192.1$ , CH-2'); 115.43 (d,  $J_{\text{C,F}} = 5.3$ , CH-8); 120.39 (CH-5); 121.77 (C-4b); 124.46 (CH-7); 126.01 (C-6); 135.33 (C-8a); 155.38 (C-9a); 155.52 (CH-2); 157.87 (C-4); <sup>19</sup>F{<sup>1</sup>H} NMR (470.3 MHz, DMSO-*d*<sub>6</sub>): -188.81. IR (ATR):  $\nu = 3484$ , 3327, 3153, 2939, 1655,

1590, 1576, 1462, 1306, 1043, 797, 426  $\text{cm}^{-1}$ ; ESI MS  $m/z$  (rel.%): 353.0 (85)  $[\text{M}+\text{H}]^+$ , 375.0 (100)  $[\text{M}+\text{Na}]^+$ ; HR MS (ESI) for  $\text{C}_{15}\text{H}_{14}\text{ClFN}_4\text{O}_3$   $[\text{M}+\text{H}]^+$ : calcd 353.08128; found 353.08112.

### **6-Chloro-9-(2-deoxy-2-fluoro- $\beta$ -D-arabinofuranosyl)-4-methoxy-9H-pyrimido-[4,5-*b*]indole (9b)**

Nucleoside **7** (210 mg, 0.36 mmol) was dissolved in dry MeOH (10 mL) and solution of sodium methoxide (1M in MeOH, 1 mL) was added. The mixture was stirred for 3 hours at r.t. Solvent was evaporated and the crude was purified by RP-HPFC (C18 column, 10 $\rightarrow$ 100% MeOH in  $\text{H}_2\text{O}$ ) and recrystallized from a  $\text{H}_2\text{O}$ /MeOH mixture to give compound **9b** (29 mg, 22%) as a white solid: m.p. 248–250  $^\circ\text{C}$ ;  $[\alpha]_{\text{D}}^{20}$  +30.2 (c 0.16, DMSO);  $^1\text{H}$  NMR (500.0 MHz,  $\text{DMSO}-d_6$ ): 3.74–3.85 (m, 2H, H-5'); 3.87 (m, 1H, H-4'); 4.21 (s, 3H,  $\text{CH}_3\text{O}$ ); 4.49 (dddd, 1H,  $J_{\text{H,F}} = 23.5$ ,  $J_{3',4'} = 5.9$ ,  $J_{3',\text{OH}} = 5.3$ ,  $J_{3',2'} = 2.6$ , H-3'); 5.19 (t, 1H,  $J_{\text{OH},5'} = 5.5$ , OH-5'); 5.20 (ddd, 1H,  $J_{\text{H,F}} = 53.2$ ,  $J_{2',1'} = 4.5$ ,  $J_{2',3'} = 2.6$ , H-2'); 5.98 (d, 1H,  $J_{\text{OH},3'} = 5.3$ , OH-3'); 6.91 (dd, 1H,  $J_{\text{H,F}} = 20.3$ ,  $J_{1',2'} = 4.5$ , H-1'); 7.49 (dd, 1H,  $J_{7,8} = 8.9$ ,  $J_{7,5} = 2.2$ , H-7); 7.97 (d, 1H,  $J_{5,7} = 2.2$ , H-5); 7.99 (dd, 1H,  $J_{8,7} = 8.9$ ,  $J_{\text{H,F}} = 3.0$ , H-8); 8.72 (s, 1H, H-2);  $^{13}\text{C}$  NMR (125.7 MHz,  $\text{DMSO}-d_6$ ): 54.53 ( $\text{CH}_3\text{O}$ ); 60.29 ( $\text{CH}_2$ -5'); 74.20 (d,  $J_{\text{C,F}} = 24.1$ , CH-3'); 82.78 (d,  $J_{\text{C,F}} = 17.6$ , CH-1'); 83.11 (d,  $J_{\text{C,F}} = 4.8$ , CH-4'); 98.08 (d,  $J_{\text{C,F}} = 192.1$ , CH-2'); 98.40 (C-4a); 116.40 (d,  $J_{\text{C,F}} = 5.3$ , CH-8); 120.36 (C-4b); 120.98 (CH-5); 126.24 (CH-7); 126.47 (C-6); 136.17 (C-8a); 155.23 (CH-2); 156.14 (C-9a); 163.97 (C-4);  $^{19}\text{F}$  NMR (470.3 MHz,  $\text{DMSO}-d_6$ ): -188.99 (ddd,  $J_{\text{F,H}2'} = 53.2$ ,  $J_{\text{F,H}3'} = 23.5$ ,  $J_{\text{F,H}1'} = 20.3$ ); IR (ATR):  $\nu = 3232, 1596, 1457, 1321, 1293, 1168, 1135, 1051, 981, 874, 799, 648, 554 \text{ cm}^{-1}$ ; ESI MS  $m/z$  (rel.%): 390 (100)  $[\text{M}+\text{Na}]^+$ , 368 (50)  $[\text{M}+\text{H}]^+$ ; HR MS (ESI) for  $\text{C}_{16}\text{H}_{15}\text{O}_4\text{N}_3\text{ClFNa}$   $[\text{M}+\text{Na}]^+$ : calcd 390.06273; found 390.06284.

### **6-Chloro-9-(2-deoxy-2-fluoro- $\beta$ -D-arabinofuranosyl)-4-methylsulfanyl-9H-pyrimido-[4,5-*b*]indole (9c)**

Protected nucleoside **7** (260 mg, 0.45 mmol) and sodium methanethiolate (52 mg, 0.74 mmol) were dissolved in anhydrous EtOH (10 mL) and stirred for 4 hours at r.t. The solvent was removed under reduced pressure and the crude product was purified by RP-HPFC (C18 column, 10 $\rightarrow$ 100% MeOH in  $\text{H}_2\text{O}$ ). Crystallization from a  $\text{H}_2\text{O}$ /MeOH mixture gave compound **9c** (46 mg, 32%) as a white solid: m.p. 230–231  $^\circ\text{C}$ ;  $[\alpha]_{\text{D}}^{20}$  +35.4 (c 0.23, DMSO);  $^1\text{H}$  NMR (500.0 MHz,  $\text{DMSO}-d_6$ ): 2.79 (s, 3H,  $\text{CH}_3\text{S}$ ); 3.75–3.85 (m, 2H, H-5'); 3.88 (m, 1H, H-4'); 4.49 (dddd, 1H,  $J_{\text{H,F}} = 23.6$ ,  $J_{3',4'} = 5.6$ ,  $J_{3',\text{OH}} = 5.3$ ,  $J_{3',2'} = 2.6$ , H-3'); 5.21 (ddd, 1H,  $J_{\text{H,F}} = 53.2$ ,  $J_{2',1'} = 4.5$ ,  $J_{2',3'} = 2.6$ , H-2'); 5.22 (t, 1H,  $J_{\text{OH},5'} = 5.5$ , OH-5'); 6.01 (d, 1H,  $J_{\text{OH},3'} = 5.3$ , OH-3'); 6.93 (dd, 1H,  $J_{\text{H,F}} = 20.3$ ,  $J_{1',2'} = 4.5$ , H-1'); 7.56 (dd, 1H,  $J_{7,8} = 8.9$ ,  $J_{7,5} = 2.2$ , H-7); 8.01 (d, 1H,  $J_{5,7} = 2.2$ , H-5); 8.04 (dd, 1H,  $J_{8,7} = 8.9$ ,

$J_{\text{H,F}} = 3.0$ , H-8); 8.89 (s, 1H, H-2);  $^{13}\text{C}$  NMR (125.7 MHz, DMSO- $d_6$ ): 12.16 (CH<sub>3</sub>S); 60.50 (CH<sub>2</sub>-5'); 74.44 (d,  $J_{\text{C,F}} = 24.1$ , CH-3'); 82.93 (d,  $J_{\text{C,F}} = 17.5$ , CH-1'); 83.44 (d,  $J_{\text{C,F}} = 4.6$ , CH-4'); 98.33 (d,  $J_{\text{C,F}} = 192.1$ , CH-2'); 109.54 (C-4a); 116.81 (d,  $J_{\text{C,F}} = 5.2$ , CH-8); 120.73 (C-4b); 121.48 (CH-5); 126.82 (C-6); 127.22 (CH-7); 136.83 (C-8a); 153.19 (C-9a); 154.57 (CH-2); 163.19 (C-4);  $^{19}\text{F}$  NMR (470.3 MHz, DMSO- $d_6$ ): -188.90 (ddd,  $J_{\text{F,H}2'} = 53.2$ ,  $J_{\text{F,H}3'} = 23.6$ ,  $J_{\text{F,H}1'} = 20.3$ ); IR (ATR):  $\nu = 3254, 1555, 1470, 1436, 1309, 1234, 1079, 1043, 1007, 849, 729, 541, 513$  cm<sup>-1</sup>; ESI MS  $m/z$  (rel. %): 406 (100) [M+Na], 384 (49) [M+H]; HR MS (ESI) for C<sub>16</sub>H<sub>15</sub>O<sub>3</sub>N<sub>3</sub>ClFNaS [M+Na]<sup>+</sup>: calcd 406.03989; found 406.03996.

### **6-Chloro-9-(2-deoxy-2-fluoro- $\beta$ -D-arabinofuranosyl)-4-methyl-9H-pyrimido-[4,5-*b*]indole (9d)**

Overnight deprotection of **8d** (100 mg; 0.18 mmol) according to the general procedure B and purification by RP-HPFC (C18 column, 20→60% MeOH in H<sub>2</sub>O) afforded compound **9d** (49 mg; 78%) as a white solid: m.p. 211–216 °C;  $[\alpha]_{\text{D}}^{20} +33.0$  (c 0.29, DMSO);  $^1\text{H}$  NMR (500.0 MHz, DMSO- $d_6$ ): 2.95 (s, 3H, CH<sub>3</sub>); 3.78 (bdd, 1H,  $J_{\text{gem}} = 11.9$ ,  $J_{5'b,4'} = 4.8$ , H-5'b); 3.83 (bdd, 1H,  $J_{\text{gem}} = 11.9$ ,  $J_{5'a,4'} = 3.4$ , H-5'a); 3.88 (ddd, 1H,  $J_{4',3'} = 5.9$ ,  $J_{4',5'} = 4.8, 3.4$ , H-4'); 4.50 (ddd, 1H,  $J_{\text{H,F}} = 23.5$ ,  $J_{3',4'} = 5.9$ ,  $J_{3',2'} = 2.5$ , H-3'); 5.20 (bs, 1H, OH-5'); 5.21 (ddd, 1H,  $J_{\text{H,F}} = 53.3$ ,  $J_{2',1'} = 4.5$ ,  $J_{2',3'} = 2.5$ , H-2'); 5.99 (bs, 1H, OH-3'); 6.96 (dd, 1H,  $J_{\text{H,F}} = 20.5$ ,  $J_{1',2'} = 4.5$ , H-1'); 7.55 (dd, 1H,  $J_{7,8} = 8.9$ ,  $J_{7,5} = 2.1$ , H-7); 8.04 (dd, 1H,  $J_{8,7} = 8.9$ ,  $J_{\text{H,F}} = 3.0$ , H-8); 8.18 (d, 1H,  $J_{5,7} = 2.1$ , H-5); 8.90 (s, 1H, H-2);  $^{13}\text{C}$  NMR (125.7 MHz, DMSO- $d_6$ ): 22.91 (CH<sub>3</sub>); 60.23 (CH<sub>2</sub>-5'); 74.22 (d,  $J_{\text{C,F}} = 24.0$ , CH-3'); 82.51 (d,  $J_{\text{C,F}} = 17.6$ , CH-1'); 83.12 (d,  $J_{\text{C,F}} = 4.8$ , CH-4'); 98.08 (d,  $J_{\text{C,F}} = 192.1$ , CH-2'); 111.35 (C-4a); 116.31 (d,  $J_{\text{C,F}} = 5.2$ , CH-8); 121.18 (C-4b); 121.97 (CH-5); 126.48 (C-6); 127.10 (CH-7); 137.05 (C-8a); 154.40 (C-9a); 154.59 (CH-2); 161.03 (C-4);  $^{19}\text{F}\{^1\text{H}\}$  NMR (470.3 MHz, DMSO- $d_6$ ): -188.81; IR (ATR):  $\nu = 3259, 2928, 2875, 1590, 1477, 1130, 1083, 814, 795, 590, 531$  cm<sup>-1</sup>; ESI MS  $m/z$  (rel.%): 352.1 (18) [M+H]<sup>+</sup>, 374.1 (100) [M+Na]<sup>+</sup>; HR MS (ESI) for C<sub>16</sub>H<sub>16</sub>ClFN<sub>3</sub>O<sub>3</sub> [M+H]<sup>+</sup>: calcd 352.08592; found 352.08587.

### **6-Chloro-9-(2-deoxy-2-fluoro- $\beta$ -D-arabinofuranosyl)-4-(furan-2-yl)-9H-pyrimido-[4,5-*b*]indole (9e)**

Overnight deprotection of **8e** (212 mg; 0.35 mmol) according to the general procedure B and purification by HPFC (silica column, 0→10% MeOH in DCM) afforded compound **9e** (97 mg; 69%) as a white solid; m.p. 75–81 °C;  $[\alpha]_{\text{D}}^{20} +41.3$  (c 0.27, DMSO);  $^1\text{H}$  NMR (499.8 MHz, DMSO- $d_6$ ): 3.77–3.92 (m, 3H, H-4',5'); 4.51 (dddd, 1H,  $J_{\text{H,F}} = 23.7$ ,  $J_{3',4'} = 5.8$ ,  $J_{3',\text{OH}} = 5.4$ ,  $J_{3',2'} = 2.4$ , H-3'); 5.20 (t, 1H,  $J_{\text{OH},5'} = 5.4$ , OH-5'); 5.24 (ddd, 1H,  $J_{\text{H,F}} = 53.3$ ,  $J_{2',1'} = 4.4$ ,  $J_{2',3'} = 2.4$ , H-2');

5.99 (d, 1H,  $J_{\text{OH},3'} = 5.4$ , OH-3'); 6.91 (dd, 1H,  $J_{4,3} = 3.5$ ,  $J_{4,5} = 1.8$ , H-4-furyl); 7.03 (dd, 1H,  $J_{\text{H},\text{F}} = 21.0$ ,  $J_{1',2'} = 4.4$ , H-1'); 7.60 (dd, 1H,  $J_{7,8} = 8.9$ ,  $J_{7,5} = 2.2$ , H-7); 7.62 (dd, 1H,  $J_{3,4} = 3.5$ ,  $J_{3,5} = 0.9$ , H-3-furyl); 8.08 (dd, 1H,  $J_{8,7} = 8.9$ ,  $J_{\text{H},\text{F}} = 3.2$ , H-8); 8.36 (dd, 1H,  $J_{5,4} = 1.8$ ,  $J_{5,3} = 0.9$ , H-5-furyl); 8.80 (d, 1H,  $J_{5,7} = 2.2$ , H-5); 9.00 (s, 1H, H-2);  $^{13}\text{C}$  NMR (125.7 MHz, DMSO- $d_6$ ): 60.21 (CH<sub>2</sub>-5'); 74.27 (d,  $J_{\text{C},\text{F}} = 24.2$ , CH-3'); 82.68 (d,  $J_{\text{C},\text{F}} = 17.6$ , CH-1'); 83.23 (d,  $J_{\text{C},\text{F}} = 4.7$ , CH-4'); 98.13 (d,  $J_{\text{C},\text{F}} = 192.1$ , CH-2'); 106.88 (C-4a); 113.32 (CH-4-furyl); 115.63 (CH-3-furyl); 116.30 (d,  $J_{\text{C},\text{F}} = 5.4$ , CH-8); 120.46 (C-4b); 123.37 (CH-5); 126.54 (C-6); 127.70 (CH-7); 137.71 (C-8a); 147.07 (CH-5-furyl); 147.98 (C-4); 152.29 (C-2-furyl); 154.50 (CH-2); 156.19 (C-9a);  $^{19}\text{F}\{^1\text{H}\}$  NMR (470.3 MHz, DMSO- $d_6$ ): -188.43; IR (ATR):  $\nu = 3181, 2918, 1470, 1446, 1073, 1054, 1040, 1013, 793, 743 \text{ cm}^{-1}$ . ESI MS  $m/z$  (rel.%): 404.0 (45) [M+H]<sup>+</sup>, 425.9 (100) [M+Na]<sup>+</sup>; HR MS (ESI) for C<sub>19</sub>H<sub>16</sub>ClFN<sub>3</sub>O<sub>4</sub> [M+H]<sup>+</sup>: calcd 404.08079; found 404.08078.

### **6-Chloro-9-(2-deoxy-2-fluoro- $\beta$ -D-arabinofuranosyl)-4-(furan-3-yl)-9H-pyrimido-[4,5-*b*]indole (9f)**

Compound **8f** (164 mg; 0.27 mmol) was deprotected overnight according to the general procedure B. Purification by HPFC (silica column, 0→10% MeOH in DCM) and then by RP-HPFC (C18 column, 20→60% MeOH in H<sub>2</sub>O) gave compound **9f** (37 mg; 33%) as a white solid: m.p. 208–214 °C;  $[\alpha]_{\text{D}}^{20} +58.9$  (c 0.27, DMSO);  $^1\text{H}$  NMR (500.0 MHz, DMSO- $d_6$ ): 3.76–3.87 (m, 2H, H-5'); 3.90 (m, 1H, H-4'); 4.51 (m, 1H, H-3'); 5.20 (t, 1H,  $J_{\text{OH},5'} = 5.6$ , OH-5'); 5.24 (ddd, 1H,  $J_{\text{H},\text{F}} = 53.4$ ,  $J_{2',1'} = 4.4$ ,  $J_{2',3'} = 2.5$ , H-2'); 6.00 (d, 1H,  $J_{\text{OH},3'} = 5.2$ , OH-3'); 7.02 (dd, 1H,  $J_{\text{H},\text{F}} = 20.6$ ,  $J_{1',2'} = 4.4$ , H-1'); 7.14 (dd, 1H,  $J_{4,5} = 1.9$ ,  $J_{4,2} = 0.9$ , H-4-furyl); 7.57 (dd, 1H,  $J_{7,8} = 9.0$ ,  $J_{7,5} = 2.1$ , H-7); 8.02 (dd, 1H,  $J_{5,4} = 1.9$ ,  $J_{5,2} = 1.5$ , H-5-furyl); 8.07 (dd, 1H,  $J_{8,7} = 9.0$ ,  $J_{\text{H},\text{F}} = 3.1$ , H-8); 8.08 (d, 1H,  $J_{5,7} = 2.1$ , H-5); 8.56 (dd, 1H,  $J_{2,5} = 1.5$ ,  $J_{2,4} = 0.9$ , H-2-furyl); 9.04 (s, 1H, H-2);  $^{13}\text{C}$  NMR (125.7 MHz, DMSO- $d_6$ ): 60.21 (CH<sub>2</sub>-5'); 74.23 (d,  $J_{\text{C},\text{F}} = 24.1$ , CH-3'); 82.64 (d,  $J_{\text{C},\text{F}} = 17.5$ , CH-1'); 83.22 (d,  $J_{\text{C},\text{F}} = 4.6$ , CH-4'); 98.10 (d,  $J_{\text{C},\text{F}} = 192.1$ , CH-2'); 109.98 (C-4a); 110.73 (CH-4-furyl); 116.57 (d,  $J_{\text{C},\text{F}} = 5.1$ , CH-8); 120.49 (C-4b); 121.21 (CH-5); 124.28 (C-3-furyl); 126.23 (C-6); 127.61 (CH-7); 137.41 (C-8a); 144.60 (CH-2-furyl); 144.89 (CH-5-furyl); 153.17 (C-4); 154.75 (CH-2); 155.44 (C-9a);  $^{19}\text{F}\{^1\text{H}\}$  NMR (470.3 MHz, DMSO- $d_6$ ): -188.62; IR (ATR):  $\nu = 3266, 2926, 1593, 1477, 1296, 1057, 807, 602 \text{ cm}^{-1}$ ; ESI MS  $m/z$  (rel.%): 404.1 (32) [M+H]<sup>+</sup>, 426.1 (100) [M+Na]<sup>+</sup>; HR MS (ESI) for C<sub>19</sub>H<sub>16</sub>ClFN<sub>3</sub>O<sub>4</sub> [M+H]<sup>+</sup>: calcd 404.08089; found 404.08079.

### **6-Chloro-9-(2-deoxy-2-fluoro- $\beta$ -D-arabinofuranosyl)-4-(thiophen-2-yl)-9H-pyrimido-[4,5-*b*]indole (9g)**

Deprotection of **8g** (170 mg; 0.27 mmol) according to the general procedure B over 2 hours, RP-HPFC (C18 column, 10→100% MeOH in H<sub>2</sub>O) and recrystallization from a H<sub>2</sub>O/MeOH mixture afforded compound **9g** (88 mg; 78%) as white crystals: m.p. 225–227 °C;  $[\alpha]_{\text{D}}^{20}$  +72.3 (c 0.20, DMSO); <sup>1</sup>H NMR (500.0 MHz, DMSO-*d*<sub>6</sub>): 3.76–3.87 (m, 2H, H-5'); 3.90 (m, 1H, H-4'); 4.51 (dddd, 1H,  $J_{\text{H,F}} = 23.7$ ,  $J_{3',4'} = 5.8$ ,  $J_{3',\text{OH}} = 5.4$ ,  $J_{3',2'} = 2.5$ , H-3'); 5.21 (t, 1H,  $J_{\text{OH},5'} = 5.5$ , OH-5'); 5.25 (ddd, 1H,  $J_{\text{H,F}} = 53.2$ ,  $J_{2',1'} = 4.4$ ,  $J_{2',3'} = 2.5$ , H-2'); 6.01 (d, 1H,  $J_{\text{OH},3'} = 5.4$ , OH-3'); 7.03 (dd, 1H,  $J_{\text{H,F}} = 20.8$ ,  $J_{1',2'} = 4.4$ , H-1'); 7.43 (dd, 1H,  $J_{4,5} = 5.0$ ,  $J_{4,3} = 3.7$ , H-4-thienyl); 7.56 (dd, 1H,  $J_{7,8} = 8.9$ ,  $J_{7,5} = 2.2$ , H-7); 8.01 (dd, 1H,  $J_{5,4} = 5.0$ ,  $J_{5,3} = 1.1$ , H-5-thienyl); 8.09 (dd, 1H,  $J_{8,7} = 8.9$ ,  $J_{\text{H,F}} = 3.1$ , H-8); 8.10 (dd, 1H,  $J_{3,4} = 3.7$ ,  $J_{3,5} = 1.1$ , H-3-thienyl); 8.22 (d, 1H,  $J_{5,7} = 2.2$ , H-5); 9.02 (s, 1H, H-2); <sup>13</sup>C NMR (125.7 MHz, DMSO-*d*<sub>6</sub>): 60.21 (CH<sub>2</sub>-5'); 74.24 (d,  $J_{\text{C,F}} = 24.1$ , CH-3'); 82.73 (d,  $J_{\text{C,F}} = 17.5$ , CH-1'); 83.27 (d,  $J_{\text{C,F}} = 4.6$ , CH-4'); 98.13 (d,  $J_{\text{C,F}} = 192.1$ , CH-2'); 108.69 (C-4a); 116.73 (d,  $J_{\text{C,F}} = 5.4$ , CH-8); 120.41 (C-4b); 120.97 (CH-5); 126.24 (C-6); 127.85 (CH-7); 128.72 (CH-4-thienyl); 130.14 (CH-3-thienyl); 131.72 (CH-5-thienyl); 137.54, (C-8a); 140.93 (C-2-thienyl); 153.48 (C-4); 154.53 (CH-2); 155.89 (C-9a); <sup>19</sup>F NMR (470.3 MHz, DMSO-*d*<sub>6</sub>): –188.49 (ddd,  $J_{\text{F},\text{H}2'} = 53.2$ ,  $J_{\text{F},\text{H}3'} = 23.7$ ,  $J_{\text{F},\text{H}1'} = 20.8$ ); IR (ATR):  $\nu = 3132, 1560, 1440, 1402, 1159, 1044, 1003, 856, 833, 806, 731, 547, 469$  cm<sup>-1</sup>; ESI MS *m/z* (rel. %): 442 (100) [M+Na]<sup>+</sup>, 420 (80) [M+H]<sup>+</sup>; HR MS (ESI) for C<sub>19</sub>H<sub>15</sub>ClFN<sub>3</sub>O<sub>3</sub>NaS [M+Na]<sup>+</sup>: calcd 442.03989; found 442.03988.

### **6-Chloro-9-(2-deoxy-2-fluoro-β-D-arabinofuranosyl)-4-(thiophen-3-yl)-9H-pyrimido-[4,5-*b*]indole (9h)**

Deprotection of **8h** (160 mg; 0.25 mmol) according to the general procedure B over 2 hours, RP-HPFC (C18 column, 10→100% MeOH in H<sub>2</sub>O) and recrystallization from a H<sub>2</sub>O/MeOH mixture afforded compound **9h** (68 mg; 65%) as a beige crystalline solid: m.p. 240–241 °C;  $[\alpha]_{\text{D}}^{20}$  +73.2 (c 0.24, DMSO); <sup>1</sup>H NMR (500.0 MHz, DMSO-*d*<sub>6</sub>): 3.76–3.87 (m, 2H, H-5'); 3.90 (m, 1H, H-4'); 4.52 (dddd, 1H,  $J_{\text{H,F}} = 23.7$ ,  $J_{3',4'} = 5.8$ ,  $J_{3',\text{OH}} = 5.4$ ,  $J_{3',2'} = 2.5$ , H-3'); 5.20 (t, 1H,  $J_{\text{OH},5'} = 5.6$ , OH-5'); 5.25 (ddd, 1H,  $J_{\text{H,F}} = 53.2$ ,  $J_{2',1'} = 4.4$ ,  $J_{2',3'} = 2.5$ , H-2'); 6.01 (d, 1H,  $J_{\text{OH},3'} = 5.4$ , OH-3'); 7.03 (dd, 1H,  $J_{\text{H,F}} = 20.7$ ,  $J_{1',2'} = 4.4$ , H-1'); 7.56 (dd, 1H,  $J_{7,8} = 8.9$ ,  $J_{7,5} = 2.2$ , H-7); 7.68 (dd, 1H,  $J_{4,5} = 5.0$ ,  $J_{4,2} = 1.3$ , H-4-thienyl); 7.88 (dd, 1H,  $J_{5,4} = 5.0$ ,  $J_{5,2} = 2.9$ , H-5-thienyl); 7.93 (d, 1H,  $J_{5,7} = 2.2$ , H-5); 8.07 (dd, 1H,  $J_{8,7} = 8.9$ ,  $J_{\text{H,F}} = 3.1$ , H-8); 8.34 (dd, 1H,  $J_{2,5} = 2.9$ ,  $J_{2,4} = 1.3$ , H-2-thienyl); 9.06 (s, 1H, H-2); <sup>13</sup>C NMR (125.7 MHz, DMSO-*d*<sub>6</sub>): 60.26 (CH<sub>2</sub>-5'); 74.27 (d,  $J_{\text{C,F}} = 24.1$ , CH-3'); 82.68 (d,  $J_{\text{C,F}} = 17.5$ , CH-1'); 83.26 (d,  $J_{\text{C,F}} = 4.6$ , CH-4'); 98.15 (d,  $J_{\text{C,F}} = 192.1$ , CH-2'); 109.96 (C-4a); 116.66 (d,  $J_{\text{C,F}} = 5.3$ , CH-8); 120.63 (C-4b); 121.10 (CH-5); 126.16 (C-6); 127.70 (CH-7); 127.95 (CH-5-thienyl); 128.22 (CH-4-thienyl); 128.80 (CH-2-thienyl); 137.50, (C-8a); 139.09 (C-3-thienyl); 154.79 (CH-2); 155.60, 155.65 (C-4,9a); <sup>19</sup>F NMR (470.3 MHz,



DMSO-*d*<sub>6</sub>): -188.58 (ddd,  $J_{F,H2'} = 53.2$ ,  $J_{F,H3'} = 23.7$ ,  $J_{F,H1'} = 20.7$ ); IR (ATR):  $\nu = 3123, 1564, 1444, 1156, 1042, 1009, 802, 718, 694, 614, 589, 547, 506, 474 \text{ cm}^{-1}$ ; ESI MS  $m/z$  (rel. %): 420 (100) [M+H]<sup>+</sup>, 442 (70) [M+Na]<sup>+</sup>; HR MS (ESI) for C<sub>19</sub>H<sub>16</sub>ClFN<sub>3</sub>O<sub>3</sub>S [M+H]<sup>+</sup>: calcd 420.05794; found 420.05789.

### **6-Chloro-9-(2-deoxy-2-fluoro- $\beta$ -D-arabinofuranosyl)-4-phenyl-9H-pyrimido-[4,5-*b*]indole (9i)**

Deprotection of **8i** (165 mg; 0.27 mmol) was carried out according to the general procedure over 2 h. Purification by RP-HPFC (C18 column, 10→100% MeOH in H<sub>2</sub>O) and recrystallization from a H<sub>2</sub>O/MeOH mixture afforded compound **9i** (68 mg; 65%) as a yellowish solid: m.p. 214–216 °C;  $[\alpha]_D^{20} +68.2$  (c 0.25, DMSO); <sup>1</sup>H NMR (500.0 MHz, DMSO-*d*<sub>6</sub>): 3.76–3.87 (m, 2H, H-5'); 3.91 (m, 1H, H-4'); 4.52 (dddd, 1H,  $J_{H,F} = 23.5$ ,  $J_{3',4'} = 5.6$ ,  $J_{3',OH} = 4.6$ ,  $J_{3',2'} = 2.5$ , H-3'); 5.21 (t, 1H,  $J_{OH,5'} = 5.6$ , OH-5'); 5.26 (ddd, 1H,  $J_{H,F} = 53.3$ ,  $J_{2',1'} = 4.4$ ,  $J_{2',3'} = 2.5$ , H-2'); 6.02 (d, 1H,  $J_{OH,3'} = 4.6$ , OH-3'); 7.04 (dd, 1H,  $J_{H,F} = 20.7$ ,  $J_{1',2'} = 4.4$ , H-1'); 7.55 (dd, 1H,  $J_{7,8} = 8.9$ ,  $J_{7,5} = 2.2$ , H-7); 7.66–7.72 (m, 4H, H-5, H-*m,p*-Ph); 7.88–7.92 (m, 2H, H-*o*-Ph); 8.07 (dd, 1H,  $J_{8,7} = 8.9$ ,  $J_{H,F} = 3.1$ , H-8); 9.12 (s, 1H, H-2); <sup>13</sup>C NMR (125.7 MHz, DMSO-*d*<sub>6</sub>): 60.29 (CH<sub>2</sub>-5'); 74.29 (d,  $J_{C,F} = 24.1$ , CH-3'); 82.72 (d,  $J_{C,F} = 17.5$ , CH-1'); 83.31 (d,  $J_{C,F} = 4.6$ , CH-4'); 98.15 (d,  $J_{C,F} = 192.1$ , CH-2'); 110.18 (C-4a); 116.78 (d,  $J_{C,F} = 5.3$ , CH-8); 120.58 (C-4b); 120.91 (CH-5); 126.10 (C-6); 127.77 (CH-7); 128.99 (CH-*o*-Ph); 129.12 (CH-*m*-Ph); 130.77 (CH-*p*-Ph); 137.58, 137.63 (C-8a, C-*i*-Ph); 154.92 (CH-2); 155.54 (C-9a); 160.36 (C-4); <sup>19</sup>F NMR (470.3 MHz, DMSO-*d*<sub>6</sub>): -188.57 (ddd,  $J_{F,H2'} = 53.3$ ,  $J_{F,H3'} = 23.5$ ,  $J_{F,H1'} = 20.7$ ); IR (ATR):  $\nu = 3426, 1555, 1436, 1097, 1068, 850, 813, 786, 768, 703, 598, 555, 478, 455 \text{ cm}^{-1}$ ; ESI MS  $m/z$  (rel. %): 414 (100) [M+H]<sup>+</sup>, 436 (41) [M+Na]<sup>+</sup>; HR MS (ESI) for C<sub>21</sub>H<sub>17</sub>ClFN<sub>3</sub>O<sub>3</sub>Na [M+Na]<sup>+</sup>: calcd 436.08347; found 436.08343.

### **4,6-Dichloro-9-(2,3-O-isopropylidene-5-O-tert-butyltrimethylsilyl- $\beta$ -D-ribofuranosyl)-9H-pyrimido[4,5-*b*]indole (11)**

To a solution of protected ribose **10**<sup>3</sup> (960 mg, 3.2 mmol) and CCl<sub>4</sub> (0.45 mL, 6.7 mmol) in anhydrous toluene (10 mL) at -30 °C, tris(dimethylamino)phosphine (0.5 mL, 2.8 mmol) was added dropwise. After 10 min of vigorous stirring at -30 °C, the reaction mixture was quickly washed with ice-cold brine (10 mL), dried over MgSO<sub>4</sub> and added to a vigorously stirred suspension of pyrimidoindole **5**<sup>1</sup>, powdered KOH (355 mg, 6.3 mmol), and TDA-1 (0.7 mL, 2.1 mmol) in anhydrous toluene (15 mL). The reaction mixture was stirred for 24 hours at r.t. After filtration and evaporation of solvents under reduced pressure, the reaction mixture was purified by

HPFC (silica column, 0→5 % EtOAc in PE) to give the crude nucleoside **11** (400 mg) as a yellow oil, which was used directly in the next step.

<sup>1</sup>H NMR (500.0 MHz, DMSO-*d*<sub>6</sub>): −0.054, −0.048 (2 × s, 2 × 3H, CH<sub>3</sub>Si); 0.81 (s, 9H, (CH<sub>3</sub>)<sub>3</sub>CSi); 1.32, 1.58 (2 × s, 2 × 3H, (CH<sub>3</sub>)<sub>3</sub>C); 3.73 (dd, 1H, *J*<sub>gem</sub> = 11.3, *J*<sub>5'b,4'</sub> = 5.3, H-5'b); 3.81 (dd, 1H, *J*<sub>gem</sub> = 11.3, *J*<sub>5'a,4'</sub> = 4.4, H-5'a); 4.18 (ddd, 1H, *J*<sub>4',5'</sub> = 5.3, 4.4, *J*<sub>4',3'</sub> = 4.2, H-4'); 5.10 (dd, 1H, *J*<sub>3',2'</sub> = 6.7, *J*<sub>3',4'</sub> = 4.2, H-3'); 5.54 (dd, 1H, *J*<sub>2',3'</sub> = 6.7, *J*<sub>2',1'</sub> = 3.2, H-2'); 6.64 (d, 1H, *J*<sub>1',2'</sub> = 3.2, H-1'); 7.67 (dd, 1H, *J*<sub>7,8</sub> = 8.9, *J*<sub>7,5</sub> = 2.1, H-7); 8.02 (d, 1H, *J*<sub>8,7</sub> = 8.9, H-8); 8.33 (d, 1H, *J*<sub>5,7</sub> = 2.1, H-5); 8.93 (s, 1H, H-2); <sup>13</sup>C NMR (125.7 MHz, DMSO-*d*<sub>6</sub>): −5.32 (CH<sub>3</sub>Si); 18.23 ((CH<sub>3</sub>)<sub>3</sub>CSi); 25.50 ((CH<sub>3</sub>)<sub>2</sub>C); 25.91 ((CH<sub>3</sub>)<sub>3</sub>CSi); 27.29 ((CH<sub>3</sub>)<sub>2</sub>C); 62.80 (CH<sub>2</sub>-5'); 80.27 (CH-3'); 82.25 (CH-2'); 85.57 (CH-4'); 88.48 (CH-1'); 111.32 (C-4a); 114.32 ((CH<sub>3</sub>)<sub>2</sub>C); 114.46 (CH-8); 119.59 (C-4b); 121.92 (CH-5); 127.50 (C-6); 128.69 (CH-7); 136.58 (C-8a); 152.55 (C-4); 154.70 (CH-2); 155.36 (C-9a); ESI MS *m/z* (rel. %): 524 (6) [M+H]<sup>+</sup>, 546 (25) [M+Na]<sup>+</sup>; HR MS (ESI) for C<sub>24</sub>H<sub>31</sub>O<sub>4</sub>N<sub>3</sub>Cl<sub>2</sub>NaSi [M+Na]<sup>+</sup>: calcd 546.13531; found 546.13532.

#### 4,6-Dichloro-9-(β-D-ribofuranosyl)-9H-pyrimido[4,5-*b*]indole (**12**)

Crude nucleoside **11** (400 mg) was treated with aqueous TFA (90% *v/v*, 5 mL) and stirred at r.t. for 30 min. Volatiles were removed under reduced pressure and the residue was co-evaporated few times with MeOH. Crystallization from H<sub>2</sub>O/MeOH mixture gave the free nucleoside **12** (225 mg, 29% over 2 steps) as a white solid: m.p. 253–256 °C; [α]<sub>D</sub><sup>20</sup> −49.3 (c 0.21, DMSO); <sup>1</sup>H NMR (500.0 MHz, DMSO-*d*<sub>6</sub>): 3.69 (dd, 1H, *J*<sub>gem</sub> = 12.0, *J*<sub>5'b,4'</sub> = 3.7, H-5'b); 3.72 (dd, 1H, *J*<sub>gem</sub> = 12.0, *J*<sub>5'a,4'</sub> = 3.3, H-5'a); 4.01 (ddd, 1H, *J*<sub>4',5'</sub> = 3.7, 3.3, *J*<sub>4',3'</sub> = 2.8, H-4'); 4.23 (dd, 1H, *J*<sub>3',2'</sub> = 5.7, *J*<sub>3',4'</sub> = 2.8, H-3'); 4.72 (dd, 1H, *J*<sub>2',1'</sub> = 7.4, *J*<sub>2',3'</sub> = 5.7, H-2'); 5.12–5.42 (bm, 3H, OH-2',3',5'); 6.49 (d, 1H, *J*<sub>1',2'</sub> = 7.4, H-1'); 7.69 (dd, 1H, *J*<sub>7,8</sub> = 8.9, *J*<sub>7,5</sub> = 2.2, H-7); 8.25 (d, 1H, *J*<sub>8,7</sub> = 8.9, H-8); 8.33 (d, 1H, *J*<sub>5,7</sub> = 2.2, H-5); 8.91 (s, 1H, H-2); <sup>13</sup>C NMR (125.7 MHz, DMSO-*d*<sub>6</sub>): 61.62 (CH<sub>2</sub>-5'); 70.15 (CH-3'); 70.90 (CH-2'); 85.94 (CH-4'); 87.37 (CH-1'); 111.06 (C-4a); 115.51 (CH-8); 119.65 (C-4b); 121.73 (CH-5); 127.22 (C-6); 128.60 (CH-7); 136.52 (C-8a); 152.37 (C-4); 154.61 (CH-2); 156.23 (C-9a); IR (ATR): *v* = 3257, 1590, 1551, 1445, 1228, 1106, 1075, 1055, 1031, 1004, 835, 621, 430 cm<sup>−1</sup>; ESI MS *m/z* (rel. %): 370 (100) [M+H]<sup>+</sup>, 392 (67) [M+Na]<sup>+</sup>; HR MS (ESI) for C<sub>15</sub>H<sub>14</sub>O<sub>4</sub>N<sub>3</sub>Cl<sub>2</sub> [M+H]<sup>+</sup>: calcd 370.03559; found 370.03566.

#### 4,6-Dichloro-9-[3,5-*O*-(tetraisopropylidisiloxan-1,3-diyl)-β-D-ribofuranosyl]-9H-pyrimido[4,5-*b*]indole (**13**)

Nucleoside **12** (2.7 g, 7.3 mmol) was dissolved in anhydrous pyridine (50 mL) and TIPDSCl<sub>2</sub> (2.5 mL, 7.8 mmol) was added. The mixture was stirred at r.t. for 4 h and then solvents were

removed under reduced pressure. Residue was dissolved in EtOAc (50 mL) and extracted with water (50 mL). The organic layer was dried over MgSO<sub>4</sub> and evaporated under reduced pressure. The crude product was purified by HPFC (silica column, 0→10% EtOAc in PE) to give nucleoside **13** (3.94 g, 88%) as a yellowish solid: m.p. 145–147 °C; <sup>1</sup>H NMR (500.0 MHz, CDCl<sub>3</sub>): 0.88–1.22 (m, 28H, (CH<sub>3</sub>)<sub>2</sub>CHSi); 3.22 (bs, 1H, OH-2'); 4.04–4.08 (m, 3H, H-4',5'); 4.94 (td, 1H, J<sub>2',3'</sub> = 6.1, J<sub>2',1'</sub> = 2.0, H-2'); 5.28 (m, 1H, H-3'); 6.30 (d, 1H, J<sub>1',2'</sub> = 2.0, H-1'); 7.57 (dd, 1H, J<sub>7,8</sub> = 8.8, J<sub>7,5</sub> = 2.1, H-7); 7.64 (d, 1H, J<sub>8,7</sub> = 8.8, H-8); 8.36 (d, 1H, J<sub>5,7</sub> = 2.1, H-5); 8.72 (s, 1H, H-2); <sup>13</sup>C NMR (125.7 MHz, CDCl<sub>3</sub>): 12.58, 12.76, 13.01, 13.27 ((CH<sub>3</sub>)<sub>2</sub>CHSi); 16.93, 17.00, 17.02, 17.15, 17.27, 17.35, 17.38, 17.42 ((CH<sub>3</sub>)<sub>2</sub>CHSi); 61.60 (CH<sub>2</sub>-5'); 70.72 (CH-3'); 73.44 (CH-2'); 81.56 (CH-4'); 89.40 (CH-1'); 111.95 (CH-8); 112.28 (C-4a); 119.80 (C-4b); 122.90 (CH-5); 128.40 (C-6); 128.79 (CH-7); 137.12 (C-8a); 153.20 (C-4); 153.92 (CH-2); 155.43 (C-9a); IR (ATR): ν = 2875, 1440, 1087, 1032, 868, 693, 615, 449 cm<sup>-1</sup>; ESI MS m/z (rel. %): 612 (100) [M+H]<sup>+</sup>, 634 (85) [M+Na]<sup>+</sup>; HR MS (ESI) for C<sub>27</sub>H<sub>40</sub>O<sub>5</sub>N<sub>3</sub>Cl<sub>2</sub>Si<sub>2</sub> [M+H]<sup>+</sup>: calcd 612.18781; found 612.18798.

#### **4,6-Dichloro-9-[3,5-O-(tetraisopropylidisiloxan-1,3-diyl)-β-D-erythro-pentofuran-2-ulosyl]-9H-pyrimido[4,5-b]indole (14)**

Dess-Martin periodinane (3.13 g, 7.4 mmol) was dissolved in anhydrous DCM (20 mL) and cooled to 0 °C and then the solution of **13** (1.51 g, 2.46 mmol) in anhydrous DCM (20 mL) was added. The reaction mixture was stirred 10 min at 0 °C and then it was allowed to warm to r.t. and stirred overnight. Reaction mixture was then diluted with DCM (60 mL) and The organic phase was washed with water, dried over MgSO<sub>4</sub> and evaporated under reduced pressure. HPFC (silica column, 0→10% EtOAc in PE) afforded compound **14** (1.37 g, 91%) as a yellowish foam: <sup>1</sup>H NMR (500.0 MHz, CDCl<sub>3</sub>): 0.99–1.26 (m, 28H, (CH<sub>3</sub>)<sub>2</sub>CHSi); 4.08 (ddd, 1H, J<sub>4',3'</sub> = 9.9, J<sub>4',5'</sub> = 2.9, 2.5, H-4'); 4.15 (dd, 1H, J<sub>gem</sub> = 13.2, J<sub>5'b,4'</sub> = 2.9, H-5'b); 4.20 (dd, 1H, J<sub>gem</sub> = 13.2, J<sub>5'a,4'</sub> = 2.5, H-5'a); 5.62 (d, 1H, J<sub>3',4'</sub> = 9.9, H-3'); 6.01 (s, 1H, H-1'); 7.52 (d, 1H, J<sub>8,7</sub> = 8.8, H-8); 7.58 (dd, 1H, J<sub>7,8</sub> = 8.8, J<sub>7,5</sub> = 2.1, H-7); 8.34 (d, 1H, J<sub>5,7</sub> = 2.1, H-5); 8.60 (s, 1H, H-2); <sup>13</sup>C NMR (125.7 MHz, CDCl<sub>3</sub>): 12.40, 12.49, 12.90, 13.46 ((CH<sub>3</sub>)<sub>2</sub>CHSi); 16.74, 16.77, 16.81, 16.91, 17.19, 17.27, 17.29, 17.31 ((CH<sub>3</sub>)<sub>2</sub>CHSi); 60.56 (CH<sub>2</sub>-5'); 72.27 (CH-3'); 78.59 (CH-4'); 79.56 (CH-1'); 110.80 (CH-8); 112.32 (C-4a); 119.95 (C-4b); 123.14 (CH-5); 128.92 (C-6); 128.99 (CH-7); 137.15 (C-8a); 153.31 (C-4); 153.77 (CH-2); 155.26 (C-9a); 206.22 (C-3'); IR (ATR): ν = 2945, 2868, 1786, 1584, 1553, 1460, 1435, 1171, 1130, 1101, 1075, 1027, 886, 852, 694 cm<sup>-1</sup>; ESI MS m/z (rel. %): 610 (23) [M+H]<sup>+</sup>, 632 (12) [M+Na]<sup>+</sup>; HR MS (ESI) for C<sub>27</sub>H<sub>38</sub>O<sub>5</sub>N<sub>3</sub>Cl<sub>2</sub>Si<sub>2</sub> [M+H]<sup>+</sup>: calcd 610.17216; found 610.17223.

**4,6-Dichloro-9-[3,5-*O*-(tetraisopropylidisiloxan-1,3-diyl)- $\beta$ -D-arabinofuranosyl]-9*H*-pyrimido[4,5-*b*]indole (15)**

Compound **14** (3.55 g, 5.8 mmol) was dissolved in ethanol (99%, 100 mL) and cooled to 0 °C. Then the solution of sodium borohydride (440 mg, 11.6 mmol) in ethanol (99%, 100 mL) was slowly added and the reaction mixture was stirred at r.t. for 1.5 h. Then, aqueous NH<sub>4</sub>Cl (saturated, 60 mL) was added and the reaction mixture was extracted with EtOAc (300 mL). The organic layer was washed with water (150 mL), dried over MgSO<sub>4</sub> and evaporated under reduced pressure. HPFC (SiO<sub>2</sub>, 0→15% EtOAc in PE) gave arabinonucleoside **15** (3.37 g, 95%) as a white foam: <sup>1</sup>H NMR (500.0 MHz, CDCl<sub>3</sub>): 0.97–1.18 (m, 28H, (CH<sub>3</sub>)<sub>2</sub>CHSi); 3.81 (ddd, 1H, *J*<sub>4',3'</sub> = 7.7, *J*<sub>4',5'</sub> = 4.1, 3.4, H-4'); 3.98 (dd, 1H, *J*<sub>gem</sub> = 12.7, *J*<sub>5'b,4'</sub> = 4.1, H-5'b); 4.03 (dd, 1H, *J*<sub>gem</sub> = 12.7, *J*<sub>5'a,4'</sub> = 3.4, H-5'a); 4.76 (t, 1H, *J*<sub>2',1'</sub> = *J*<sub>2',3'</sub> = 6.6, H-2'); 4.85 (dd, 1H, *J*<sub>3',4'</sub> = 7.7, *J*<sub>3',2'</sub> = 6.6, H-3'); 6.55 (d, 1H, *J*<sub>1',2'</sub> = 6.6, H-1'); 7.56 (dd, 1H, *J*<sub>7,8</sub> = 8.9, *J*<sub>7,5</sub> = 2.1, H-7); 7.82 (d, 1H, *J*<sub>8,7</sub> = 8.9, H-8); 8.36 (d, 1H, *J*<sub>5,7</sub> = 2.1, H-5); 8.72 (s, 1H, H-2); <sup>13</sup>C NMR (125.7 MHz, CDCl<sub>3</sub>): 12.45, 13.01, 13.08, 13.55 ((CH<sub>3</sub>)<sub>2</sub>CHSi); 17.01, 17.04, 17.09, 17.10, 17.39, 17.45, 17.54 ((CH<sub>3</sub>)<sub>2</sub>CHSi); 61.18 (CH<sub>2</sub>-5'); 76.40 (CH-3'); 78.35 (CH-2'); 80.49 (CH-4'); 83.83 (CH-1'); 112.55 (C-4a); 113.80 (CH-8); 119.97 (C-4b); 122.72 (CH-5); 128.65 (C-6); 129.06 (CH-7); 138.20 (C-8a); 153.46 (CH-2); 153.53 (C-4); 155.39 (C-9a); IR (ATR):  $\nu$  = 2944, 2867, 1750, 1581, 1546, 1460, 1437, 1223, 1153, 1098, 1032, 1010, 885, 837, 793, 694 cm<sup>-1</sup>; ESI MS *m/z* (rel. %): 612 (46) [M+H]<sup>+</sup>, 634 (100) [M+Na]<sup>+</sup>; HR MS (ESI) for C<sub>27</sub>H<sub>39</sub>O<sub>5</sub>N<sub>3</sub>Cl<sub>2</sub>NaSi<sub>2</sub> [M+Na]<sup>+</sup>: calcd 634.16975; found 634.16989.

**4,6-Dichloro-9-( $\beta$ -D-arabinofuranosyl)-9*H*-pyrimido[4,5-*b*]indole (16)**

Et<sub>3</sub>N·3HF (660  $\mu$ l, 4 mmol) was added to a solution of silyl-protected nucleoside **15** (1.2 g, 2 mmol) in anhydrous THF (30 mL). The reaction mixture was stirred overnight at r.t. and evaporated under reduced pressure. RP-HPFC (C18 column, 10→100% MeOH in H<sub>2</sub>O) and recrystallization from a H<sub>2</sub>O/MeOH mixture afforded the free arabinonucleoside **16** (705 mg, 95%) as a white solid: m.p. 217–219 °C; [ $\alpha$ ]<sub>D</sub><sup>20</sup> –19.1 (c 0.20, DMSO); <sup>1</sup>H NMR (500.0 MHz, DMSO-*d*<sub>6</sub>): 3.76–3.88 (m, 3H, H-4',5'); 4.15 (td, 1H, *J*<sub>3',4'</sub> = *J*<sub>3',OH</sub> = 4.8, *J*<sub>3',2'</sub> = 3.3, H-3'); 4.23 (td, 1H, *J*<sub>2',1'</sub> = *J*<sub>2',OH</sub> = 4.8, *J*<sub>2',3'</sub> = 3.3, H-2'); 5.16 (t, 1H, *J*<sub>OH,5'</sub> = 5.3, OH-5'); 5.33 (d, 1H, *J*<sub>OH,2'</sub> = 4.8, OH-2'); 5.62 (d, 1H, *J*<sub>OH,3'</sub> = 4.8, OH-3'); 6.81 (d, 1H, *J*<sub>1',2'</sub> = 4.9, H-1'); 7.62 (dd, 1H, *J*<sub>7,8</sub> = 9.0, *J*<sub>7,5</sub> = 2.2, H-7); 8.16 (d, 1H, *J*<sub>8,7</sub> = 9.0, H-8); 8.26 (d, 1H, *J*<sub>5,7</sub> = 2.2, H-5); 8.89 (s, 1H, H-2); <sup>13</sup>C NMR (125.7 MHz, DMSO-*d*<sub>6</sub>): 60.98 (CH<sub>2</sub>-5'); 76.44 (CH-3'); 77.69 (CH-2'); 84.18 (CH-4'); 86.02 (CH-1'); 110.88 (C-4a); 117.86 (CH-8); 119.29 (C-4b); 121.02 (CH-5); 126.63 (C-6); 128.12 (CH-7); 138.42 (C-8a); 152.02 (C-4); 154.53 (CH-2); 155.58 (C-9a); IR (ATR):  $\nu$  = 3302, 1590, 1442,

1296, 1219, 1157, 1064, 1033, 830, 566, 426  $\text{cm}^{-1}$ ; ESI MS  $m/z$  (rel. %): 392 (100)  $[\text{M}+\text{Na}]^+$ ; HR MS (ESI) for  $\text{C}_{15}\text{H}_{13}\text{O}_4\text{N}_3\text{Cl}_2\text{Na}$   $[\text{M}+\text{Na}]^+$ : calcd 392.01753; found 392.01764.

#### **4-Amino-9-( $\beta$ -D-arabinofuranosyl)-6-chloro-9H-pyrimido[4,5-*b*]indole (17a)**

Arabinoside **16** (120 mg, 0.32 mmol) was dissolved in dioxane (3 mL) and aqueous ammonia (30%, 3 mL) was added. The reaction mixture was stirred in screw-cap pressure glass tube at 100 °C for 20 h and then solvents were evaporated under reduced pressure. RP-HPFC (C18 column, 10→100% MeOH in  $\text{H}_2\text{O}$ ) and recrystallization from a  $\text{H}_2\text{O}/\text{MeOH}$  mixture afforded nucleoside **17a** (95 mg, 85%) as a white solid: m.p. 298–301 °C;  $[\alpha]_{\text{D}}^{20}$  0 (c 0.23, DMSO);  $^1\text{H}$  NMR (500.0 MHz,  $\text{DMSO}-d_6$ ): 3.69–3.85 (m, 3H, H-4',5'); 4.10–4.17 (m, 2H, H-2',3'); 5.14 (t, 1H,  $J_{\text{OH},5'} = 5.2$ , OH-5'); 5.33 (d, 1H,  $J_{\text{OH},2'} = 5.2$ , OH-2'); 5.51 (d, 1H,  $J_{\text{OH},3'} = 4.7$ , OH-3'); 6.69 (d, 1H,  $J_{1',2'} = 4.7$ , H-1'); 7.30 (dd, 1H,  $J_{7,8} = 8.9$ ,  $J_{7,5} = 2.2$ , H-7); 7.37 (bs, 2H,  $\text{NH}_2$ ); 7.92 (d, 1H,  $J_{8,7} = 8.9$ , H-8); 8.30 (s, 1H, H-2); 8.42 (d, 1H,  $J_{5,7} = 2.2$ , H-5);  $^{13}\text{C}$  NMR (125.7 MHz,  $\text{DMSO}-d_6$ ): 61.24 ( $\text{CH}_2$ -5'); 76.73 (CH-3'); 77.67 (CH-2'); 83.75 (CH-4'); 85.32 (CH-1'); 94.95 (C-4a); 116.22 (CH-8); 120.06 (CH-5); 121.56 (C-4b); 123.99 (CH-7); 125.41 (C-6); 136.09 (C-8a); 155.21 (CH-2); 155.53 (C-9a); 157.78 (C-4); IR (ATR):  $\nu = 3120, 1654, 1597, 1460, 1319, 1218, 1033, 907, 855, 795, 525 \text{ cm}^{-1}$ ; ESI MS  $m/z$  (rel. %): 351 (100)  $[\text{M}+\text{H}]^+$ , 373 (56)  $[\text{M}+\text{Na}]^+$ ; HR MS (ESI) for  $\text{C}_{15}\text{H}_{16}\text{O}_4\text{N}_4\text{Cl}$   $[\text{M}+\text{H}]^+$ : calcd 351.08546; found 351.08557.

#### **9-( $\beta$ -D-Arabinofuranosyl)-6-chloro-4-methoxy-9H-pyrimido[4,5-*b*]indole (17b)**

Nucleoside **16** (80 mg, 0.22 mmol) was dissolved in dry MeOH (5 mL) and solution of sodium methoxide (1M in MeOH, 2 mL) was added. The mixture was stirred for 3 h at r.t. Solvent evaporation, purification by RP-HPFC (C18 column, 10→100% MeOH in  $\text{H}_2\text{O}$ ) and recrystallization from a  $\text{H}_2\text{O}/\text{MeOH}$  mixture gave nucleoside **17b** (62 mg, 77%) as a white solid: m.p. 238–241 °C;  $[\alpha]_{\text{D}}^{20}$  -8.4 (c 0.30, DMSO);  $^1\text{H}$  NMR (500.0 MHz,  $\text{DMSO}-d_6$ ): 3.75–3.85 (m, 3H, H-4',5'); 4.15 (td, 1H,  $J_{3',4'} = J_{3',\text{OH}} = 4.8$ ,  $J_{3',2'} = 3.3$ , H-3'); 4.20 (td, 1H,  $J_{2',1'} = J_{2',\text{OH}} = 4.9$ ,  $J_{2',3'} = 3.3$ , H-2'); 4.20 (s, 3H,  $\text{CH}_3\text{O}$ ); 5.32 (t, 1H,  $J_{\text{OH},5'} = 5.1$ , OH-5'); 5.32 (d, 1H,  $J_{\text{OH},2'} = 4.9$ , OH-2'); 5.55 (d, 1H,  $J_{\text{OH},3'} = 4.8$ , OH-3'); 6.77 (d, 1H,  $J_{1',2'} = 4.9$ , H-1'); 7.45 (dd, 1H,  $J_{7,8} = 8.9$ ,  $J_{7,5} = 2.2$ , H-7); 7.95 (d, 1H,  $J_{5,7} = 2.2$ , H-5); 8.04 (d, 1H,  $J_{8,7} = 8.9$ , H-8); 8.68 (s, 1H, H-2);  $^{13}\text{C}$  NMR (125.7 MHz,  $\text{DMSO}-d_6$ ): 54.38 ( $\text{CH}_3\text{O}$ ); 61.12 ( $\text{CH}_2$ -5'); 76.57 (CH-3'); 77.67 (CH-2'); 83.93 (CH-4'); 85.65 (CH-1'); 98.31 (C-4a); 117.22 (CH-8); 120.15 (C-4b); 120.61 (CH-5); 125.68 (CH-7); 125.82 (C-6); 136.92 (C-8a); 154.85 (CH-2); 156.33 (C-9a); 163.81 (C-4); IR (ATR):  $\nu = 3299, 1598, 1566, 1460, 1323, 1294, 1192, 1124, 1052, 943, 769, 722, 588, 560 \text{ cm}^{-1}$ ; ESI MS  $m/z$  (rel.

%): 388 (100) [M+Na]<sup>+</sup>; HR MS (ESI) for C<sub>16</sub>H<sub>16</sub>O<sub>5</sub>N<sub>3</sub>ClNa [M+Na]<sup>+</sup>: calcd 388.06707; found 388.06722.

### 9-(β-D-Arabinofuranosyl)-6-chloro-4-methylsulfanyl-9H-pyrimido[4,5-b]indole (17c)

Nucleoside **16** (80 mg, 0.22 mmol) and sodium methanethiolate (30 mg, 0.43 mmol) were dissolved in anhydrous EtOH (10 mL) and stirred for 3 h at r.t. The solvent was removed under reduced pressure and the crude product was purified by RP-HPFC (C18 column, 10→100% MeOH in H<sub>2</sub>O). Recrystallization from a H<sub>2</sub>O/MeOH mixture gave compound **17c** (60 mg, 71%) as a white solid: m.p. 181–183 °C; [α]<sub>D</sub><sup>20</sup> –14.9 (c 0.28, DMSO); <sup>1</sup>H NMR (500.0 MHz, DMSO-*d*<sub>6</sub>): 2.80 (s, 3H, CH<sub>3</sub>S); 3.76–3.85 (m, 3H, H-4',5'); 4.15 (td, 1H, *J*<sub>3',4'</sub> = *J*<sub>3',OH</sub> = 4.8, *J*<sub>3',2'</sub> = 3.2, H-3'); 4.20 (td, 1H, *J*<sub>2',1'</sub> = *J*<sub>2',OH</sub> = 4.9, *J*<sub>2',3'</sub> = 3.2, H-2'); 5.11 (t, 1H, *J*<sub>OH,5'</sub> = 5.2, OH-5'); 5.30 (d, 1H, *J*<sub>OH,2'</sub> = 4.9, OH-2'); 5.56 (d, 1H, *J*<sub>OH,3'</sub> = 4.8, OH-3'); 6.79 (d, 1H, *J*<sub>1',2'</sub> = 4.9, H-1'); 7.52 (dd, 1H, *J*<sub>7,8</sub> = 8.9, *J*<sub>7,5</sub> = 2.2, H-7); 8.01 (d, 1H, *J*<sub>5,7</sub> = 2.2, H-5); 8.10 (d, 1H, *J*<sub>8,7</sub> = 8.9, H-8); 8.87 (s, 1H, H-2); <sup>13</sup>C NMR (125.7 MHz, DMSO-*d*<sub>6</sub>): 11.83 (CH<sub>3</sub>S); 61.05 (CH<sub>2</sub>-5'); 76.54 (CH-3'); 77.68 (CH-2'); 83.99 (CH-4'); 85.57 (CH-1'); 109.33 (C-4a); 117.38 (CH-8); 120.28 (C-4b); 120.87 (CH-5); 125.89 (C-6); 126.40 (CH-7); 137.38 (C-8a); 153.10 (C-9a); 154.03 (CH-2); 162.32 (C-4); IR (ATR): ν = 3278, 1557, 1473, 1433, 1292, 1236, 1163, 1119, 1072, 943, 844, 802, 593, 565 cm<sup>-1</sup>; ESI MS *m/z* (rel. %): 404 (100) [M+Na]<sup>+</sup>; HR MS (ESI) for C<sub>16</sub>H<sub>16</sub>O<sub>4</sub>N<sub>3</sub>ClNaS [M+Na]<sup>+</sup>: calcd 404.04423; found 404.04433.

### 9-(β-D-Arabinofuranosyl)-6-chloro-4-methyl-9H-pyrimido[4,5-b]indole (17d)

Nucleoside **16** (80 mg, 0.22 mmol) and Pd(PPh<sub>3</sub>)<sub>4</sub> (13 mg, 0.011 mmol) were dissolved in anhydrous THF (5 mL) and Me<sub>3</sub>Al (2M in toluene, 220 μL) was added. The mixture was stirred at 70 °C for 18 h and solvents were evaporated. RP-HPFC (C18 column, 10→100% MeOH in H<sub>2</sub>O) and recrystallization from a H<sub>2</sub>O/MeOH mixture gave nucleoside **17d** (52 mg, 68%) as a white solid: m.p. 233–235 °C; [α]<sub>D</sub><sup>20</sup> –10.7 (c 0.21, DMSO); <sup>1</sup>H NMR (500.0 MHz, DMSO-*d*<sub>6</sub>): 2.97 (s, 3H, CH<sub>3</sub>); 3.76–3.87 (m, 3H, H-4',5'); 4.16 (dd, 1H, *J*<sub>3',4'</sub> = 4.5, *J*<sub>3',2'</sub> = 3.3, H-3'); 4.22 (td, 1H, *J*<sub>2',1'</sub> = 4.9, *J*<sub>2',3'</sub> = 3.3, H-2'); 6.81 (d, 1H, *J*<sub>1',2'</sub> = 4.9, H-1'); 7.53 (dd, 1H, *J*<sub>7,8</sub> = 8.9, *J*<sub>7,5</sub> = 2.2, H-7); 8.11 (d, 1H, *J*<sub>8,7</sub> = 8.9, H-8); 8.17 (d, 1H, *J*<sub>5,7</sub> = 2.2, H-5); 8.93 (s, 1H, H-2); <sup>13</sup>C NMR (125.7 MHz, DMSO-*d*<sub>6</sub>): 22.48 (CH<sub>3</sub>O); 61.06 (CH<sub>2</sub>-5'); 76.59 (CH-3'); 77.64 (CH-2'); 83.99 (CH-4'); 85.50 (CH-1'); 111.50 (C-4a); 117.31 (CH-8); 120.94 (C-4b); 121.67 (CH-5); 126.12 (C-6); 126.86 (CH-7); 138.01 (C-8a); 153.70 (CH-2); 154.55 (C-9a); 159.89 (C-4); IR (ATR): ν = 3271, 1564, 1475, 1068, 1030, 836, 567, 425 cm<sup>-1</sup>; ESI MS *m/z* (rel. %): 350 (12) [M+H]<sup>+</sup>, 372 (100) [M+Na]<sup>+</sup>; HR MS (ESI) for C<sub>16</sub>H<sub>16</sub>O<sub>4</sub>N<sub>3</sub>ClNa [M+Na]<sup>+</sup>: calcd 372.07215; found 372.07232.

### 9-( $\beta$ -D-Arabinofuranosyl)-6-chloro-4-(furan-2-yl)-9H-pyrimido[4,5-*b*]indole (17e)

Arabinoside **16** (120 mg, 0.32 mmol) was reacted with furan-2-boronic acid (54 mg, 0.48 mmol) in 3 mL of H<sub>2</sub>O/MeCN (2:1) for 2 h according to the general procedure A. Recrystallization from a H<sub>2</sub>O/MeOH mixture gave **17e** (42 mg, 33%) as a greenish solid: m.p. 241–243 °C; [ $\alpha$ ]<sub>D</sub><sup>20</sup> –7.2 (c 0.15, DMSO); <sup>1</sup>H NMR (500.0 MHz, DMSO-*d*<sub>6</sub>): 3.77–3.87 (m, 3H, H-4',5'); 4.16 (m, 1H, H-3'); 4.24 (td, 1H,  $J_{2',1'} = J_{2',OH} = 4.9$  Hz,  $J_{2',3'} = 3.2$  Hz, H-2'); 5.14 (bs, 1H, OH-5'); 5.34 (d, 1H,  $J_{OH,2'} = 5.0$  Hz, OH-2'); 5.58 (bd, 1H,  $J_{OH,3'} = 4.8$  Hz, OH-3'); 6.88 (d, 1H,  $J_{1',2'} = 4.9$  Hz, H-1'); 6.91 (dd, 1H,  $J_{4,3} = 3.5$  Hz,  $J_{4,5} = 1.8$  Hz, H-4-furyl); 7.55 (dd, 1H,  $J_{7,8} = 8.9$  Hz,  $J_{7,5} = 2.2$  Hz, H-7); 7.61 (dd, 1H,  $J_{3,4} = 3.5$  Hz,  $J_{3,5} = 0.9$  Hz, H-3-furyl); 8.14 (dd, 1H,  $J_{8,7} = 8.9$  Hz,  $J_{8,5} = 0.6$  Hz, H-8); 8.36 (dd, 1H,  $J_{5,4} = 1.8$  Hz,  $J_{5,3} = 0.9$  Hz, H-5-furyl); 8.77 (dd, 1H,  $J_{5,7} = 2.2$  Hz,  $J_{5,8} = 0.6$  Hz, H-5); 8.97 (s, 1H, H-2); <sup>13</sup>C NMR (125.7 MHz, DMSO-*d*<sub>6</sub>): 61.07 (CH<sub>2</sub>-5'); 76.70 (CH-3'); 77.70 (CH-2'); 84.01 (CH-4'); 85.65 (CH-1'); 107.03 (C-4a); 113.33 (CH-4-furyl); 115.37 (CH-3-furyl); 117.22 (CH-8); 120.26 (C-4b); 123.02 (CH-5); 125.96 (C-6); 127.24 (CH-7); 138.60 (C-8a); 146.92 (CH-5-furyl); 144.67 (C-4); 152.50 (C-2-furyl); 154.29 (CH-2); 156.40 (C-9a); IR (ATR):  $\nu = 3194, 1542, 1474, 1439, 1296, 1073, 1044, 1024, 799, 750, 592, 562, 524$  cm<sup>-1</sup>; ESI MS *m/z* (rel. %): 424 (100) [M+Na]<sup>+</sup>; HR MS (ESI) for C<sub>19</sub>H<sub>16</sub>O<sub>5</sub>N<sub>3</sub>ClNa [M+Na]<sup>+</sup>: calcd 424.06707; found 424.06713.

### 9-( $\beta$ -D-Arabinofuranosyl)-6-chloro-4-(furan-3-yl)-9H-pyrimido[4,5-*b*]indole (17f)

Arabinoside **16** (120 mg, 0.32 mmol) was reacted with furan-3-boronic acid (54 mg, 0.48 mmol) in 3 mL of H<sub>2</sub>O/MeCN (2:1) for 2 h according to the general procedure A. Recrystallization from H<sub>2</sub>O/MeOH mixture gave **17f** (80 mg, 62%) as a tan solid: m.p. 186–188 °C; [ $\alpha$ ]<sub>D</sub><sup>20</sup> +19.1 (c 0.19, DMSO); <sup>1</sup>H NMR (500.0 MHz, DMSO-*d*<sub>6</sub>): 3.76–3.87 (m, 3H, H-4',5'); 4.16 (td, 1H,  $J_{3',4'} = J_{3',OH} = 4.7$  Hz,  $J_{3',2'} = 3.2$  Hz, H-3'); 4.24 (td, 1H,  $J_{2',1'} = J_{2',OH} = 5.0$  Hz,  $J_{2',3'} = 3.2$  Hz, H-2'); 5.12 (t, 1H,  $J_{OH,5'} = 5.1$  Hz, OH-5'); 5.34 (d, 1H,  $J_{OH,2'} = 5.0$  Hz, OH-2'); 5.57 (d, 1H,  $J_{OH,3'} = 4.8$  Hz, OH-3'); 6.87 (d, 1H,  $J_{1',2'} = 4.9$  Hz, H-1'); 7.12 (dd, 1H,  $J_{4,5} = 1.8$  Hz,  $J_{4,2} = 0.9$  Hz, H-4-furyl); 7.52 (dd, 1H,  $J_{7,8} = 9.0$  Hz,  $J_{7,5} = 2.2$  Hz, H-7); 8.02 (t, 1H,  $J_{5,2} = J_{5,4} = 1.7$  Hz, H-5-furyl); 8.05 (dd, 1H,  $J_{5,7} = 2.2$  Hz,  $J_{5,8} = 0.5$  Hz, H-5); 8.13 (dd, 1H,  $J_{8,7} = 9.0$  Hz,  $J_{8,5} = 0.5$  Hz, H-8); 8.54 (dd, 1H,  $J_{2,5} = 1.6$  Hz,  $J_{2,4} = 0.9$  Hz, H-2-furyl); 9.00 (s, 1H, H-2); <sup>13</sup>C NMR (125.7 MHz, DMSO-*d*<sub>6</sub>): 61.05 (CH<sub>2</sub>-5'); 76.64 (CH-3'); 77.66 (CH-2'); 84.01 (CH-4'); 85.57 (CH-1'); 110.05 (C-4a); 110.77 (CH-4-furyl); 117.46 (CH-8); 120.26 (C-4b); 120.82 (CH-5); 124.43 (C-3-furyl); 125.63 (C-6); 127.12 (CH-7); 138.27 (C-8a); 144.43 (CH-2-furyl); 144.89 (CH-5-furyl); 152.73 (C-4); 154.52 (CH-2); 155.62 (C-9a); IR (ATR):  $\nu = 3363, 1565, 1477, 1451, 1113, 1073, 1056, 1026, 876, 833,$

690, 642, 601, 549  $\text{cm}^{-1}$ ; ESI MS  $m/z$  (rel. %): 424 (100)  $[\text{M}+\text{Na}]^+$ , 402 (39)  $[\text{M}+\text{H}]^+$ ; HR MS (ESI) for  $\text{C}_{19}\text{H}_{16}\text{O}_5\text{N}_3\text{ClNa}$   $[\text{M}+\text{Na}]^+$ : calcd 424.06707; found 424.06720.

### 9-( $\beta$ -D-Arabinofuranosyl)-6-chloro-4-(thiophen-2-yl)-9H-pyrimido[4,5-*b*]indole (17g)

Arabinoside **16** (120 mg, 0.32 mmol) was reacted with thiophene-2-boronic acid (62 mg, 0.48 mmol) in 3 mL of  $\text{H}_2\text{O}/\text{MeCN}$  (2:1) for 2 h according to the general procedure A. Recrystallization from  $\text{H}_2\text{O}/\text{MeOH}$  mixture gave **17g** (94 mg, 70%) as a tan solid: m.p. 192–194  $^\circ\text{C}$ ;  $[\alpha]_{\text{D}}^{20} +18.1$  (c 0.26, DMSO);  $^1\text{H}$  NMR (500.0 MHz, DMSO- $d_6$ ): 3.77–3.87 (m, 3H, H-4',5'); 4.16 (td, 1H,  $J_{3',4'} = J_{3',\text{OH}} = 4.8$ ,  $J_{3',2'} = 3.2$ , H-3'); 4.25 (td, 1H,  $J_{2',1'} = J_{2',\text{OH}} = 4.8$ ,  $J_{2',3'} = 3.2$ , H-2'); 5.13 (t, 1H,  $J_{\text{OH},5'} = 5.0$ , OH-5'); 5.35 (d, 1H,  $J_{\text{OH},2'} = 4.8$ , OH-2'); 5.59 (d, 1H,  $J_{\text{OH},3'} = 4.8$ , OH-3'); 6.88 (d, 1H,  $J_{1',2'} = 4.8$ , H-1'); 7.43 (dd, 1H,  $J_{4,5} = 5.0$ ,  $J_{4,3} = 3.7$ , H-4-thienyl); 7.54 (dd, 1H,  $J_{7,8} = 9.0$ ,  $J_{7,5} = 2.2$ , H-7); 7.99 (dd, 1H,  $J_{5,4} = 5.0$ ,  $J_{5,3} = 1.1$ , H-5-thienyl); 8.06 (dd, 1H,  $J_{3,4} = 3.7$ ,  $J_{3,5} = 1.1$ , H-3-thienyl); 8.15 (d, 1H,  $J_{8,7} = 9.0$ , H-8); 8.20 (d, 1H,  $J_{5,7} = 2.2$ , H-5); 8.98 (s, 1H, H-2);  $^{13}\text{C}$  NMR (125.7 MHz, DMSO- $d_6$ ): 61.06 ( $\text{CH}_2$ -5'); 76.66 (CH-3'); 77.69 (CH-2'); 84.06 (CH-4'); 85.71 (CH-1'); 108.77 (C-4a); 117.61 (CH-8); 120.16 (C-4b); 120.58 (CH-5); 125.65 (C-6); 127.36 (CH-7); 128.69 (CH-4-thienyl); 129.83 (CH-3-thienyl); 131.48 (CH-5-thienyl); 138.42 (C-8a); 141.16 (C-2-thienyl); 153.07 (C-4); 154.30 (CH-2); 156.06 (C-9a); IR (ATR):  $\nu = 3358, 1562, 1447, 1217, 1172, 1138, 1057, 918, 707, 632, 483$   $\text{cm}^{-1}$ ; ESI MS  $m/z$  (rel. %): 418 (100)  $[\text{M}+\text{H}]^+$ ; HR MS (ESI) for  $\text{C}_{19}\text{H}_{17}\text{O}_4\text{N}_3\text{ClS}$   $[\text{M}+\text{H}]^+$ : calcd 418.06228; found 418.06235.

### 9-( $\beta$ -D-Arabinofuranosyl)-6-chloro-4-(thiophen-3-yl)-9H-pyrimido[4,5-*b*]indole (17h)

Arabinoside **16** (120 mg, 0.32 mmol) was reacted with thiophene-3-boronic acid (62 mg, 0.48 mmol) in 3 mL of  $\text{H}_2\text{O}/\text{MeCN}$  (2:1) for 2 h according to the general procedure A. Recrystallization from  $\text{H}_2\text{O}/\text{MeOH}$  mixture gave **17h** (100 mg, 75%) as a white crystalline solid: m.p. 207–209  $^\circ\text{C}$ ;  $[\alpha]_{\text{D}}^{20} +9.2$  (c 0.22, DMSO);  $^1\text{H}$  NMR (500.0 MHz, DMSO- $d_6$ ): 3.77–3.87 (m, 3H, H-4',5'); 4.17 (td, 1H,  $J_{3',4'} = J_{3',\text{OH}} = 4.7$  Hz,  $J_{3',2'} = 3.2$  Hz, H-3'); 4.25 (td, 1H,  $J_{2',1'} = J_{2',\text{OH}} = 5.0$  Hz,  $J_{2',3'} = 3.2$  Hz, H-2'); 5.12 (bt, 1H,  $J_{\text{OH},5'} = 5.2$  Hz, OH-5'); 5.35 (d, 1H,  $J_{\text{OH},2'} = 5.0$  Hz, OH-2'); 5.58 (d, 1H,  $J_{\text{OH},3'} = 4.8$  Hz, OH-3'); 6.88 (d, 1H,  $J_{1',2'} = 4.9$  Hz, H-1'); 7.51 (dd, 1H,  $J_{7,8} = 9.0$  Hz,  $J_{7,5} = 2.2$  Hz, H-7); 7.66 (dd, 1H,  $J_{4,5} = 5.0$  Hz,  $J_{4,2} = 1.3$  Hz, H-4-thienyl); 7.88 (dd, 1H,  $J_{5,4} = 5.0$  Hz,  $J_{5,2} = 2.9$  Hz, H-5-thienyl); 7.91 (dd, 1H,  $J_{5,7} = 2.2$  Hz,  $J_{5,8} = 0.5$  Hz, H-5); 8.13 (dd, 1H,  $J_{8,7} = 9.0$  Hz,  $J_{8,5} = 0.5$  Hz, H-8); 8.31 (dd, 1H,  $J_{2,5} = 2.9$  Hz,  $J_{2,4} = 1.3$  Hz, H-2-thienyl); 9.02 (s, 1H, H-2);  $^{13}\text{C}$  NMR (125.7 MHz, DMSO- $d_6$ ): 61.07 ( $\text{CH}_2$ -5'); 76.65 (CH-3'); 77.67 (CH-2'); 84.04 (CH-4'); 85.60 (CH-1'); 109.98 (C-4a); 117.51 (CH-8); 120.36 (C-4b); 120.69 (CH-5); 125.51 (C-6); 127.17 (CH-7); 127.89 (CH-5-thienyl); 128.18 (CH-4-thienyl); 128.51 (CH-2-thienyl); 138.33 (C-



8a); 139.27 (C-3-thienyl); 154.52 (CH-2); 155.21 (C-4); 155.75 (C-9a); IR (ATR):  $\nu = 3800, 1564, 1449, 1105, 1072, 1056, 999, 813, 777, 587, 502, 444 \text{ cm}^{-1}$ ; ESI MS  $m/z$  (rel. %): 440 (100)  $[M+Na]^+$ , 418 (51)  $[M+H]^+$ ; HR MS (ESI) for  $C_{19}H_{16}O_4N_3ClNaS$   $[M+Na]^+$ : calcd 440.04423; found 440.04424.

### 9-( $\beta$ -D-Arabinofuranosyl)-6-chloro-4-phenyl-9H-pyrimido[4,5-*b*]indole (17i)

Arabinoside **16** (120 mg, 0.32 mmol) was reacted with phenylboronic acid (59 mg, 0.48 mmol) in 3 mL of  $H_2O/MeCN$  (2:1) for 4 h according to the general procedure A. Recrystallization from  $H_2O/MeOH$  mixture gave **17i** (76 mg, 58%) as a tan solid: m.p. 183–185 °C;  $[\alpha]_D^{20} -6.5$  (c 0.17, DMSO);  $^1H$  NMR (500.0 MHz,  $DMSO-d_6$ ): 3.78–3.88 (m, 3H, H-4',5'); 4.18 (td, 1H,  $J_{3',4'} = J_{3',OH} = 4.8$ ,  $J_{3',2'} = 3.2$ , H-3'); 4.26 (td, 1H,  $J_{2',1'} = J_{2',OH} = 4.8$ ,  $J_{2',3'} = 3.2$ , H-2'); 5.13 (t, 1H,  $J_{OH,5'} = 5.3$ , OH-5'); 5.36 (d, 1H,  $J_{OH,2'} = 4.8$ , OH-2'); 5.59 (d, 1H,  $J_{OH,3'} = 4.8$ , OH-3'); 6.90 (d, 1H,  $J_{1',2'} = 4.8$ , H-1'); 7.50 (dd, 1H,  $J_{7,8} = 9.0$ ,  $J_{7,5} = 2.2$ , H-7); 7.64 (d, 1H,  $J_{5,7} = 2.2$ , H-5); 7.67–7.72 (m, 3H, H-*m,p*-Ph); 7.88 (m, 2H, H-*o*-Ph); 8.13 (d, 1H,  $J_{8,7} = 9.0$ , H-8); 9.08 (s, 1H, H-2);  $^{13}C$  NMR (125.7 MHz,  $DMSO-d_6$ ): 61.10 (CH<sub>2</sub>-5'); 76.67 (CH-3'); 77.68 (CH-2'); 84.10 (CH-4'); 85.66 (CH-1'); 110.16 (C-4a); 117.61 (CH-8); 120.30 (C-4b); 120.50 (CH-5); 125.44 (C-6); 127.21 (CH-7); 128.91 (CH-*o*-Ph); 129.09 (CH-*m*-Ph); 130.62 (CH-*p*-Ph); 137.83 (C-*i*-Ph); 138.39 (C-8a); 154.64 (CH-2); 155.66 (C-9a); 159.88 (C-4); IR (ATR):  $\nu = 3365, 1561, 1448, 1219, 1174, 1058, 918, 883, 767, 702, 640, 601, 483 \text{ cm}^{-1}$ ; ESI MS  $m/z$  (rel. %): 412 (100)  $[M+H]^+$ , 434 (59)  $[M+Na]^+$ ; HR MS (ESI) for  $C_{21}H_{19}O_4N_3Cl$   $[M+H]^+$ : calcd 412.10586; found 412.10594.

### 4,6-Dichloro-9-[2-*O*-acetyl-3,5-*O*-(tetraisopropylidisiloxan-1,3-diyl)- $\beta$ -D-arabinofuranosyl]-9H-pyrimido[4,5-*b*]indole (18)

Protected arabinonucleoside **15** (3.49 g, 5.7 mmol) was dissolved in anhydrous  $MeCN$  (100 mL) and  $Et_3N$  (0.95 mL, 6.8 mmol), DMAP (70 mg, 0.57 mmol) and acetic anhydride (0.65 mL, 6.8 mmol) were added. The mixture was stirred at r.t. for 1 h and then evaporated under reduced pressure. Residue was dissolved in  $EtOAc$  (60 mL), extracted with water (50 mL) and saturated  $NaHCO_3$  (30 mL), dried over  $MgSO_4$  and evaporated under reduced pressure to give crude acetate **18** (3.62 g, 96%) as a yellowish foam:  $^1H$  NMR (500.0 MHz,  $CDCl_3$ ): 0.98–1.28 (m, 28H,  $(CH_3)_2CHSi$ ); 1.32 (s, 3H,  $CH_3CO$ ); 3.90 (ddd, 1H,  $J_{4',3'} = 8.5$ ,  $J_{4',5'} = 3.8$ , 3.2, H-4'); 4.14 (dd, 1H,  $J_{gem} = 12.7$ ,  $J_{5'b,4'} = 3.2$ , H-5'b); 4.27 (dd, 1H,  $J_{gem} = 12.7$ ,  $J_{5'a,4'} = 3.8$ , H-5'a); 5.11 (bdd, 1H,  $J_{3',4'} = 8.5$ ,  $J_{3',2'} = 6.5$ , H-3'); 5.56 (dd, 1H,  $J_{2',1'} = 6.9$ ,  $J_{2',3'} = 6.5$ , H-2'); 7.00 (d, 1H,  $J_{1',2'} = 6.9$ , H-1'); 7.51 (dd, 1H,  $J_{7,8} = 8.9$ ,  $J_{7,5} = 2.2$ , H-7); 7.79 (d, 1H,  $J_{8,7} = 8.9$ , H-8); 8.33 (d, 1H,  $J_{5,7} = 2.2$ , H-5); 8.80 (s, 1H, H-2);  $^{13}C$  NMR (125.7 MHz,  $CDCl_3$ ): 12.44, 13.03, 13.13, 13.33 ( $(CH_3)_2CHSi$ ); 16.80,

16.84, 16.91, 16.96, 17.36, 17.43, 17.52, 17.54 ((CH<sub>3</sub>)<sub>2</sub>CHSi); 19.56 (CH<sub>3</sub>CO); 60.85 (CH<sub>2</sub>-5'); 74.09 (CH-3'); 79.19 (CH-2'); 80.02 (CH-4'); 81.74 (CH-1'); 111.57 (C-4a); 114.54 (CH-8); 119.80 (C-4b); 122.42 (CH-5); 128.29 (C-6); 128.51 (CH-7); 137.09 (C-8a); 153.02 (C-4); 154.11 (CH-2); 155.89 (C-9a); 169.49 (COCH<sub>3</sub>); ESI MS m/z (rel. %): 676 (100) [M+Na]<sup>+</sup>; HR MS (ESI) for C<sub>29</sub>H<sub>41</sub>O<sub>6</sub>N<sub>3</sub>Cl<sub>2</sub>NaSi<sub>2</sub> [M+Na]<sup>+</sup>: calcd 676.18032; found 676.1804215.

#### **4,6-Dichloro-9-(2-O-acetyl-β-D-arabinofuranosyl)-9H-pyrimido[4,5-b]indole (19)**

A solution of acetate **18** (6.2 g, 9.5 mmol) in anhydrous THF (100 mL) was treated with Et<sub>3</sub>N·3HF (3.1 mL, 20 mmol). The mixture was stirred overnight at r.t. Evaporation under reduced pressure and HPFC purification (silica column, 0→5% MeOH in DCM) gave **19** (3.7 g, 94%) as a yellowish foam: <sup>1</sup>H NMR (500.0 MHz, DMSO-*d*<sub>6</sub>): 1.25 (s, 3H, CH<sub>3</sub>CO); 3.79 (dd, 1H, *J*<sub>gem</sub> = 12.0, *J*<sub>5'b,4'</sub> = 5.1, H-5'b); 3.84 (dd, 1H, *J*<sub>gem</sub> = 12.0, *J*<sub>5'a,4'</sub> = 3.5, H-5'a); 3.91 (ddd, 1H, *J*<sub>4',3'</sub> = 6.4, *J*<sub>4',5'</sub> = 5.1, 3.5, H-4'); 4.48 (bdd, 1H, *J*<sub>3',4'</sub> = 6.4, *J*<sub>3',2'</sub> = 3.8, H-3'); 5.51 (bs, 1H, OH-5'); 5.27 (dd, 1H, *J*<sub>2',1'</sub> = 5.4, *J*<sub>2',3'</sub> = 3.8, H-2'); 5.92 (bs, 1H, OH-3'); 7.02 (d, 1H, *J*<sub>1',2'</sub> = 5.4, H-1'); 7.70 (dd, 1H, *J*<sub>7,8</sub> = 8.9, *J*<sub>7,5</sub> = 2.2, H-7); 8.10 (d, 1H, *J*<sub>8,7</sub> = 8.9, H-8); 8.27 (d, 1H, *J*<sub>5,7</sub> = 2.2, H-5); 8.92 (s, 1H, H-2); <sup>13</sup>C NMR (125.7 MHz, DMSO-*d*<sub>6</sub>): 19.71 (CH<sub>3</sub>CO); 60.25 (CH<sub>2</sub>-5'); 73.58 (CH-3'); 79.91 (CH-2'); 82.94 (CH-1'); 83.29 (CH-4'); 110.77 (C-4a); 116.88 (CH-8); 119.31 (C-4b); 121.37 (CH-5); 127.16 (C-6); 128.48 (CH-7); 137.16 (C-8a); 152.27 (C-4); 154.71 (CH-2); 155.54 (C-9a); 169.22 (COCH<sub>3</sub>); IR (ATR): ν = 2945, 2867, 1750, 1580, 1546, 1460, 1437, 1219, 1153, 1098, 1032, 884, 835, 793, 693 cm<sup>-1</sup>; ESI MS m/z (rel. %): 434 (100) [M+Na]<sup>+</sup>; HR MS (ESI) for C<sub>17</sub>H<sub>15</sub>O<sub>5</sub>N<sub>3</sub>Cl<sub>2</sub>Na [M+Na]<sup>+</sup>: calcd 434.02810; found 434.02816.

#### **4,6-Dichloro-9-[2-O-acetyl-3,5-di-O-(tetrahydropyran-2-yl)-β-D-arabinofuranosyl]-9H-pyrimido[4,5-b]indole (20)**

Compound **19** (1.83 g, 4.4 mmol) and TsOH·H<sub>2</sub>O (840 mg, 8.8 mmol) were dissolved in anhydrous DMF (50 mL) and the mixture was cooled to 0 °C. 3,4-Dihydro-2H-pyran (12.2 mL, 134 mmol) was added and the mixture was allowed to warm to r.t., stirred overnight, diluted with EtOAc (100 mL) and extracted with aqueous NaHCO<sub>3</sub> (saturated, 50 mL). The organic layer was dried over MgSO<sub>4</sub> and evaporated under reduced pressure. HPFC purification (silica column, 10→50% EtOAc in PE) furnished the crude product **20** (2.43 g) as a yellow oil. This intermediate was used directly in the next step. ESI MS m/z (rel. %): 580 (14) [M+H]<sup>+</sup>, 602 (100) [M+Na]<sup>+</sup>; HR MS (ESI) for C<sub>27</sub>H<sub>31</sub>O<sub>7</sub>N<sub>3</sub>Cl<sub>2</sub>Na [M+Na]<sup>+</sup>: calcd 602.14313; found 602.14319.

**4,6-Dichloro-9-[3,5-di-O-(tetrahydropyran-2-yl)- $\beta$ -D-arabinofuranosyl]-9H-pyrimido[4,5-*b*]indole (21)**

Crude THP-protected acetate **20** (2.4 g) was dissolved in methanolic ammonia (27%, 200 mL) at 0 °C and stirred for 4 h at 0 °C. The evaporation of the solution under reduced pressure resulted in crude THP-protected arabinoside **21** (2.1 g) as a yellow oil. This intermediate was used directly in the next step. ESI MS *m/z* (rel. %): 538 (14) [M+H]<sup>+</sup>, 560 (100) [M+Na]<sup>+</sup>; HR MS (ESI) for C<sub>25</sub>H<sub>29</sub>O<sub>6</sub>N<sub>3</sub>Cl<sub>2</sub>Na [M+Na]<sup>+</sup>: calcd 560.13256; found 560.13257.

**4,6-Dichloro-9-(2-deoxy-2-fluoro- $\beta$ -D-ribofuranosyl)-9H-pyrimido[4,5-*b*]indole (22)**

THP-protected arabinonucleoside **21** (2.1 g, 3.9 mmol) was dissolved in anhydrous DCM (55 mL) and anhydrous pyridine was added (2.4 mL, 9.75 mL). The mixture was cooled to 0 °C and treated with DAST (2.6 mL; 19.7 mmol). The mixture was allowed to warm to r.t. and stirred overnight. Then, it was diluted with DCM (60 mL) and neutralized with aqueous NaHCO<sub>3</sub> (saturated, 90 mL). The organic phase was washed with water (90 mL), dried over MgSO<sub>4</sub> and evaporated under reduced pressure. The crude product was then dissolved in aqueous TFA (90% *v/v*, 20 mL) and stirred at r.t. for 2 h. The solution was evaporated under reduced pressure and co-evaporated with MeOH. RP-HPFC purification (C18 column, 10→100% MeOH in H<sub>2</sub>O) and recrystallization (H<sub>2</sub>O/MeOH 3:1) gave the free fluororibonucleoside **22** (640 mg, 38% over four steps) as a beige solid: m.p. 249–251 °C; [ $\alpha$ ]<sub>D</sub><sup>20</sup> –26.2 (c 0.24, DMSO); <sup>1</sup>H NMR (500.0 MHz, DMSO-*d*<sub>6</sub>): 3.61 (dd, 1H, *J*<sub>gem</sub> = 12.3, *J*<sub>5'b,4'</sub> = 4.5, H-5'b); 3.74 (dd, 1H, *J*<sub>gem</sub> = 12.3, *J*<sub>5'a,4'</sub> = 2.6, H-5'a); 4.02 (dddd, 1H, *J*<sub>4',3'</sub> = 6.3, *J*<sub>4',5'</sub> = 4.5, 2.6, *J*<sub>H,F</sub> = 1.0, H-4'); 4.63 (ddd, 1H, *J*<sub>H,F</sub> = 14.8, *J*<sub>3',4'</sub> = 6.3, *J*<sub>3',2'</sub> = 5.4, H-3'); 5.71 (ddd, 1H, *J*<sub>H,F</sub> = 53.6, *J*<sub>2',3'</sub> = 5.4, *J*<sub>2',1'</sub> = 3.9, H-2'); 6.72 (dd, 1H, *J*<sub>H,F</sub> = 19.3, *J*<sub>1',2'</sub> = 3.9, H-1'); 7.71 (dd, 1H, *J*<sub>7,8</sub> = 8.9, *J*<sub>7,5</sub> = 2.1, H-7); 8.18 (d, 1H, *J*<sub>8,7</sub> = 8.9, H-8); 8.31 (d, 1H, *J*<sub>5,7</sub> = 2.1, H-5); 8.91 (s, 1H, H-2); <sup>13</sup>C NMR (125.7 MHz, DMSO-*d*<sub>6</sub>): 60.78 (CH<sub>2</sub>-5'); 68.45 (d, *J*<sub>C,F</sub> = 15.7, CH-3'); 84.20 (CH-4'); 86.02 (d, *J*<sub>C,F</sub> = 34.0, CH-1'); 91.75 (d, *J*<sub>C,F</sub> = 187.0, CH-2'); 111.41 (C-4a); 114.60 (CH-8); 119.53 (C-4b); 121.85 (CH-5); 127.55 (C-6); 128.92 (CH-7); 136.78 (C-8a); 152.54 (C-4); 154.70 (CH-2); 155.67 (C-9a); <sup>19</sup>F NMR (470.4 MHz, DMSO-*d*<sub>6</sub>): –198.47 (ddd, *J*<sub>F,H</sub> = 53.6, 19.3, 14.8); IR (ATR):  $\nu$  = 3279, 1589, 1443, 1295, 1227, 1104, 1057, 1028, 1003, 833, 808, 537 cm<sup>-1</sup>; ESI MS *m/z* (rel. %): 372 (100) [M+H]<sup>+</sup>; HR MS (ESI) for C<sub>15</sub>H<sub>13</sub>O<sub>3</sub>N<sub>3</sub>ClF [M+H]<sup>+</sup>: calcd 372.03125; found 372.03137.

**4-Amino-6-chloro-9-(2-deoxy-2-fluoro- $\beta$ -D-ribofuranosyl)-9H-pyrimido[4,5-*b*]indole (23a)**

Fluororiboside **22** (90 mg, 0.24 mmol) was dissolved in dioxane (3 mL) and aqueous ammonia (30%, 3 mL) was added. The mixture was stirred in screw-cap pressure glass tube at 100 °C for

20 h and then solvents were evaporated under reduced pressure. RP-HPFC (C18 column, 10→100% MeOH in H<sub>2</sub>O) and recrystallization from a H<sub>2</sub>O/MeOH mixture gave nucleoside **23a** (69 mg, 82%) as a white solid: m.p. 275–278 °C;  $[\alpha]_{\text{D}}^{20}$  –44.9 (c 0.21, DMSO); <sup>1</sup>H NMR (500.0 MHz, DMSO-*d*<sub>6</sub>): 3.59 (ddd, 1H,  $J_{\text{gem}} = 12.2$ ,  $J_{5'\text{b},\text{OH}} = 5.9$ ,  $J_{5'\text{b},4'} = 4.5$ , H-5'b); 3.72 (ddd, 1H,  $J_{\text{gem}} = 12.2$ ,  $J_{5'\text{a},\text{OH}} = 5.2$ ,  $J_{5'\text{a},4'} = 2.6$ , H-5'a); 3.97 (dddd, 1H,  $J_{4',3'} = 5.8$ ,  $J_{4',5'} = 4.5$ , 2.6,  $J_{\text{H},\text{F}} = 1.2$ , H-4'); 4.56 (dddd, 1H,  $J_{\text{H},\text{F}} = 13.0$ ,  $J_{3',\text{OH}} = 6.2$ ,  $J_{3',4'} = 5.8$ ,  $J_{3',2'} = 5.5$ , H-3'); 5.16 (dd, 1H,  $J_{\text{OH},5'} = 5.9$ , 5.2, OH-5'); 5.65 (ddd, 1H,  $J_{\text{H},\text{F}} = 54.1$ ,  $J_{2',3'} = 5.5$ ,  $J_{2',1'} = 4.4$ , H-2'); 5.69 (d, 1H,  $J_{\text{OH},3'} = 6.2$ , OH-3'); 6.60 (dd, 1H,  $J_{\text{H},\text{F}} = 19.3$ ,  $J_{1',2'} = 4.4$ , H-1'); 7.41 (dd, 1H,  $J_{7,8} = 8.8$ ,  $J_{7,5} = 2.1$ , H-7); 7.51 (bs, 2H, NH<sub>2</sub>); 7.90 (d, 1H,  $J_{8,7} = 8.8$ , H-8); 8.31 (s, 1H, H-2); 8.51 (d, 1H,  $J_{5,7} = 2.1$ , H-5); <sup>13</sup>C NMR (125.7 MHz, DMSO-*d*<sub>6</sub>): 61.18 (CH<sub>2</sub>-5'); 68.61 (d,  $J_{\text{C},\text{F}} = 15.5$ , CH-3'); 84.09 (CH-4'); 85.45 (d,  $J_{\text{C},\text{F}} = 33.3$ , CH-1'); 91.45 (d,  $J_{\text{C},\text{F}} = 186.9$ , CH-2'); 95.37 (C-4a); 112.85 (CH-8); 120.93 (CH-5); 121.28 (C-4b); 124.88 (CH-7); 126.48 (C-6); 134.57 (C-8a); 155.50 (CH-2); 155.67 (C-9a); 157.99 (C-4); <sup>19</sup>F NMR (470.4 MHz, DMSO-*d*<sub>6</sub>): –199.28 (ddd,  $J_{\text{F},\text{H}} = 54.1$ , 19.3, 13.0); IR (ATR):  $\nu = 3163$ , 1575, 1463, 1303, 1198, 1059, 901, 857, 799, 775, 425 cm<sup>–1</sup>; ESI MS *m/z* (rel. %): 353 (100) [M+H]<sup>+</sup>, 375 (31) [M+Na]<sup>+</sup>; HR MS (ESI) for C<sub>15</sub>H<sub>15</sub>O<sub>3</sub>N<sub>4</sub>ClF [M+H]<sup>+</sup>: calcd 353.08112; found 353.08124.

### 6-Chloro-9-(2-deoxy-2-fluoro-β-D-ribofuranosyl)-4-methoxy-9H-pyrimido[4,5-*b*]indole (23b)

Nucleoside **22** (90 mg, 0.24 mmol) was dissolved in dry MeOH (5 mL) and sodium methoxide (1M in MeOH, 2 mL) was added. The mixture was stirred for 3 h at r.t. Solvent was evaporated and crude product was purified by RP-HPFC (C18 column, 10→100% MeOH in H<sub>2</sub>O) and recrystallized from a H<sub>2</sub>O/MeOH mixture. Nucleoside **23b** (71 mg, 80%) was obtained as a white solid: m.p. 201–205 °C;  $[\alpha]_{\text{D}}^{20}$  –33.6 (c 0.22, DMSO); <sup>1</sup>H NMR (500.0 MHz, DMSO-*d*<sub>6</sub>): 3.60 (ddd, 1H,  $J_{\text{gem}} = 12.2$ ,  $J_{5'\text{b},\text{OH}} = 5.6$ ,  $J_{5'\text{b},4'} = 4.6$ , H-5'b); 3.73 (dd, 1H,  $J_{\text{gem}} = 12.2$ ,  $J_{5'\text{a},\text{OH}} = 5.3$ ,  $J_{5'\text{a},4'} = 2.6$ , H-5'a); 4.00 (dddd, 1H,  $J_{4',3'} = 6.3$ ,  $J_{4',5'} = 4.6$ , 2.6,  $J_{\text{H},\text{F}} = 1.0$ , H-4'); 4.20 (s, 3H, CH<sub>3</sub>O); 4.60 (dtd, 1H,  $J_{\text{H},\text{F}} = 13.8$ ,  $J_{3',4'} = J_{3',\text{OH}} = 6.3$ ,  $J_{3',2'} = 5.4$ , H-3'); 5.07 (dd, 1H,  $J_{\text{OH},5'} = 5.6$ , 5.3, OH-5'); 5.69 (ddd, 1H,  $J_{\text{H},\text{F}} = 53.6$ ,  $J_{2',3'} = 5.4$ ,  $J_{2',1'} = 4.2$ , H-2'); 5.73 (d, 1H,  $J_{\text{OH},3'} = 6.3$ , OH-3'); 6.67 (dd, 1H,  $J_{\text{H},\text{F}} = 19.2$ ,  $J_{1',2'} = 4.2$ , H-1'); 7.54 (dd, 1H,  $J_{7,8} = 8.8$ ,  $J_{7,5} = 2.2$ , H-7); 8.00 (d, 1H,  $J_{5,7} = 2.2$ , H-5); 8.05 (d, 1H,  $J_{8,7} = 8.8$ , H-8); 8.71 (s, 1H, H-2); <sup>13</sup>C NMR (125.7 MHz, DMSO-*d*<sub>6</sub>): 54.52 (CH<sub>3</sub>O); 60.97 (CH<sub>2</sub>-5'); 68.52 (d,  $J_{\text{C},\text{F}} = 15.6$ , CH-3'); 84.11 (CH-4'); 85.74 (d,  $J_{\text{C},\text{F}} = 33.5$ , CH-1'); 91.64 (d,  $J_{\text{C},\text{F}} = 187.1$ , CH-2'); 98.91 (C-4a); 113.96 (CH-8); 120.39 (C-4b); 121.45 (CH-5); 126.59 (CH-7); 126.86 (C-6); 135.39 (C-8a); 155.20 (CH-2); 156.39 (C-9a); 164.06 (C-4); <sup>19</sup>F NMR (470.4 MHz, DMSO-*d*<sub>6</sub>): –199.04 (ddd,  $J_{\text{F},\text{H}} = 53.6$ , 19.2, 13.8); IR (ATR):  $\nu = 3313$ , 1600, 1460,

1327, 1189, 1109, 1069, 1045, 894, 851, 536, 432  $\text{cm}^{-1}$ ; ESI MS  $m/z$  (rel. %): 368 (79)  $[\text{M}+\text{H}]^+$ , 390 (100)  $[\text{M}+\text{Na}]^+$ ; HR MS (ESI) for  $\text{C}_{16}\text{H}_{15}\text{O}_4\text{N}_3\text{ClFNa}$   $[\text{M}+\text{Na}]^+$ : calcd 390.06273; found 390.06282.

**6-Chloro-9-(2-deoxy-2-fluoro- $\beta$ -D-ribofuranosyl)-4-methylsulfanyl-9H-pyrimido[4,5-*b*]indole (23c)**

Nucleoside **22** (90 mg, 0.24 mmol) and sodium methanethiolate (35 mg, 0.50 mmol) were dissolved in anhydrous EtOH (10 mL) and stirred for 2 h at r.t. The solvent was evaporated under reduced pressure. RP-HPFC (C18 column, 10 $\rightarrow$ 100% MeOH in  $\text{H}_2\text{O}$ ) and recrystallization from  $\text{H}_2\text{O}$ /MeOH mixture gave compound **23c** (80 mg, 87%) as a white solid: m.p. 205–209  $^\circ\text{C}$ ;  $[\alpha]_{\text{D}}^{20}$  –34.6 (c 0.19, DMSO);  $^1\text{H}$  NMR (500.0 MHz,  $\text{DMSO}-d_6$ ): 2.80 (s, 3H,  $\text{CH}_3\text{S}$ ); 3.59 (ddd, 1H,  $J_{\text{gem}} = 12.2$ ,  $J_{5^{\text{b}},\text{OH}} = 5.5$ ,  $J_{5^{\text{b}},4^{\text{'}}} = 4.6$ , H-5'b); 3.73 (dd, 1H,  $J_{\text{gem}} = 12.2$ ,  $J_{5^{\text{a}},\text{OH}} = 5.3$ ,  $J_{5^{\text{a}},4^{\text{'}}} = 2.6$ , H-5'a); 4.00 (dddd, 1H,  $J_{4',3'} = 6.2$ ,  $J_{4',5'} = 4.6$ , 2.6,  $J_{\text{H,F}} = 1.3$ , H-4'); 4.62 (dtd, 1H,  $J_{\text{H,F}} = 13.8$ ,  $J_{3',4'} = J_{3',\text{OH}} = 6.2$ ,  $J_{3',2'} = 5.4$ , H-3'); 5.07 (dd, 1H,  $J_{\text{OH},5'} = 5.5$ , 5.3, OH-5'); 5.69 (ddd, 1H,  $J_{\text{H,F}} = 53.8$ ,  $J_{2',3'} = 5.4$ ,  $J_{2',1'} = 4.0$ , H-2'); 5.75 (d, 1H,  $J_{\text{OH},3'} = 6.2$ , OH-3'); 6.69 (dd, 1H,  $J_{\text{H,F}} = 19.5$ ,  $J_{1',2'} = 4.0$ , H-1'); 7.62 (dd, 1H,  $J_{7,8} = 8.8$ ,  $J_{7,5} = 2.1$ , H-7); 8.04 (d, 1H,  $J_{5,7} = 2.1$ , H-5); 8.11 (d, 1H,  $J_{8,7} = 8.8$ , H-8); 8.88 (s, 1H, H-2);  $^{13}\text{C}$  NMR (125.7 MHz,  $\text{DMSO}-d_6$ ): 11.92 ( $\text{CH}_3\text{S}$ ); 60.91 ( $\text{CH}_2$ -5'); 68.50 (d,  $J_{\text{C,F}} = 15.6$ , CH-3'); 84.08 (CH-4'); 85.74 (d,  $J_{\text{C,F}} = 33.8$ , CH-1'); 91.75 (d,  $J_{\text{C,F}} = 186.8$ , CH-2'); 109.74 (C-4a); 114.15 (CH-8); 120.51 (C-4b); 121.71 (CH-5); 126.94 (C-6); 127.32 (CH-7); 135.84 (C-8a); 153.24 (C-9a); 154.27 (CH-2); 163.16 (C-4);  $^{19}\text{F}$  NMR (470.4 MHz,  $\text{DMSO}-d_6$ ): –198.57 (ddd,  $J_{\text{F,H}} = 53.8$ , 19.5, 13.8); IR (ATR):  $\nu = 3247$ , 1558, 1472, 1433, 1295, 1235, 1049, 966, 906, 839, 794, 594, 535  $\text{cm}^{-1}$ ; ESI MS  $m/z$  (rel. %): 384 (81)  $[\text{M}+\text{H}]^+$ , 406 (100)  $[\text{M}+\text{Na}]^+$ ; HR MS (ESI) for  $\text{C}_{16}\text{H}_{15}\text{O}_3\text{N}_3\text{ClFNaS}$   $[\text{M}+\text{Na}]^+$ : calcd 406.03989; found 406.03999.

**6-Chloro-9-(2-deoxy-2-fluoro- $\beta$ -D-ribofuranosyl)-4-methyl-9H-pyrimido[4,5-*b*]indole (23d)**

Nucleoside **22** (90 mg, 0.24 mmol) and  $\text{Pd}(\text{PPh}_3)_4$  (14 mg, 0.012 mmol) were dissolved in anhydrous THF (4 mL) and  $\text{Me}_3\text{Al}$  (2M in toluene, 250  $\mu\text{L}$ ) was added. The mixture was stirred at 70  $^\circ\text{C}$  for 24 h. Solvents evaporation under reduced pressure, RP-HPFC purification (C18 column, 10 $\rightarrow$ 100% MeOH in  $\text{H}_2\text{O}$ ) and recrystallization from a  $\text{H}_2\text{O}$ /MeOH mixture gave compound **23d** (55 mg, 65%) as a white solid: m.p. 247–251  $^\circ\text{C}$ ;  $[\alpha]_{\text{D}}^{20}$  –45.2 (c 0.18, DMSO);  $^1\text{H}$  NMR (500.0 MHz,  $\text{DMSO}-d_6$ ): 2.95 (s, 3H,  $\text{CH}_3$ ); 3.59 (ddd, 1H,  $J_{\text{gem}} = 12.2$ ,  $J_{5^{\text{b}},\text{OH}} = 5.5$ ,  $J_{5^{\text{b}},4^{\text{'}}} = 4.7$ , H-5'b); 3.73 (dd, 1H,  $J_{\text{gem}} = 12.2$ ,  $J_{5^{\text{a}},\text{OH}} = 5.3$ ,  $J_{5^{\text{a}},4^{\text{'}}} = 2.6$ , H-5'a); 4.00 (dddd, 1H,  $J_{4',3'} = 6.2$ ,  $J_{4',5'} = 4.7$ , 2.6,  $J_{\text{H,F}} = 1.0$ , H-4'); 4.62 (dtd, 1H,  $J_{\text{H,F}} = 14.0$ ,  $J_{3',4'} = J_{3',\text{OH}} = 6.2$ ,  $J_{3',2'} = 5.4$ , H-3'); 5.08 (dd, 1H,  $J_{\text{OH},5'} = 5.5$ , 5.3, OH-5'); 5.71 (ddd, 1H,  $J_{\text{H,F}} = 53.9$ ,  $J_{2',3'} = 5.4$ ,  $J_{2',1'} = 4.1$ , H-2'); 5.75

(d, 1H,  $J_{OH,3'} = 6.2$ , OH-3'); 6.70 (dd, 1H,  $J_{H,F} = 19.4$ ,  $J_{1',2'} = 4.1$ , H-1'); 7.62 (dd, 1H,  $J_{7,8} = 8.8$ ,  $J_{7,5} = 2.1$ , H-7); 8.09 (d, 1H,  $J_{8,7} = 8.8$ , H-8); 8.23 (d, 1H,  $J_{5,7} = 2.1$ , H-5); 8.89 (s, 1H, H-2);  $^{13}C$  NMR (125.7 MHz, DMSO- $d_6$ ): 23.03 (CH<sub>3</sub>); 60.97 (CH<sub>2</sub>-5'); 68.53 (d,  $J_{C,F} = 15.6$ , CH-3'); 84.07 (CH-4'); 85.54 (d,  $J_{C,F} = 33.6$ , CH-1'); 91.57 (d,  $J_{C,F} = 186.9$ , CH-2'); 111.84 (C-4a); 113.92 (CH-8); 121.27 (C-4b); 122.59 (CH-5); 126.94 (C-6); 127.56 (CH-7); 136.30 (C-8a); 154.60 (CH-2); 154.73 (C-9a); 161.33 (C-4); IR (ATR):  $\nu = 3309, 1580, 1449, 1371, 1299, 1183, 1133, 1103, 1068, 1024, 859, 828, 808, 621, 525, 480, 425, 389$  cm<sup>-1</sup>;  $^{19}F$  NMR (470.4 MHz, DMSO- $d_6$ ): -198.88 (ddd,  $J_{F,H} = 53.9, 19.4, 14.0$ ); ESI MS  $m/z$  (rel. %): 352 (100) [M+H]<sup>+</sup>, 374 (60) [M+Na]<sup>+</sup>; HR MS (ESI) for C<sub>16</sub>H<sub>16</sub>O<sub>3</sub>N<sub>3</sub>ClF [M+H]<sup>+</sup>: calcd 352.08587; found 352.08597.

### 6-Chloro-9-(2-deoxy-2-fluoro- $\beta$ -D-ribofuranosyl)-4-(furan-2-yl)-9H-pyrimido-[4,5-*b*]indole (23e)

Nucleoside **22** (130 mg, 0.35 mmol) was reacted with furan-2-boronic acid (59 mg, 0.53 mmol) in 4 mL of H<sub>2</sub>O/MeCN (2:1) for 2 h according to the general procedure A. Recrystallization from H<sub>2</sub>O/MeOH mixture gave nucleoside **23e** (17 mg, 12%) as a white solid: m.p. 203–206 °C;  $[\alpha]_D^{20} -48.9$  (c 0.14, DMSO);  $^1H$  NMR (500.0 MHz, DMSO- $d_6$ ): 3.62 (dt, 1H,  $J_{gem} = 12.3$  Hz,  $J_{5'a,OH} = J_{5'a,4'} = 5.0$  Hz, H-5'a); 3.75 (ddd, 1H,  $J_{gem} = 12.3$  Hz,  $J_{5'b,OH} = 5.1$  Hz,  $J_{5'b,4'} = 2.6$  Hz, H-5'b); 4.01 (dddd, 1H,  $J_{4',3'} = 6.4$ ,  $J_{4',5'a} = 4.7$  Hz,  $J_{4',5'b} = 2.6$  Hz,  $J_{4',F} = 1.1$  Hz, H-4'); 4.64 (dtd, 1H,  $J_{3',F} = 14.3$  Hz,  $J_{3',4'} = J_{3',OH} = 6.3$  Hz,  $J_{3',2'} = 5.5$  Hz, H-3'); 5.09 (t, 1H,  $J_{OH,5'} = 5.4$  Hz, OH-5'); 5.73 (ddd, 1H,  $J_{2',F} = 53.9$  Hz,  $J_{2',3'} = 5.5$  Hz,  $J_{2',1'} = 4.0$  Hz, H-2'); 5.76 (bd, 1H,  $J_{OH,3'} = 6.2$  Hz, OH-3'); 6.76 (dd, 1H,  $J_{1',F} = 19.8$  Hz,  $J_{1',2'} = 4.0$  Hz, H-1'); 6.91 (dd, 1H,  $J_{4,3} = 3.5$  Hz,  $J_{4,5} = 1.8$  Hz, H-4-furyl); 7.62 (dd, 1H,  $J_{3,4} = 3.5$  Hz,  $J_{3,5} = 0.9$  Hz, H-3-furyl); 7.65 (dd, 1H,  $J_{7,8} = 8.9$  Hz,  $J_{7,5} = 2.2$  Hz, H-7); 8.11 (d, 1H,  $J_{8,7} = 8.9$  Hz, H-8); 8.36 (dd, 1H,  $J_{5,4} = 1.8$  Hz,  $J_{5,3} = 0.9$  Hz, H-5-furyl); 8.82 (d, 1H,  $J_{5,7} = 2.2$  Hz, H-5); 8.98 (s, 1H, H-2);  $^{13}C$  NMR (125.7 MHz, DMSO- $d_6$ ): 60.95 (CH<sub>2</sub>-5'); 68.51 (d,  $J_{C,F} = 15.6$  Hz, CH-3'); 84.08 (CH-4'); 85.71 (d,  $J_{C,F} = 34.2$  Hz, CH-1'); 91.58 (d,  $J_{C,F} = 186.4$  Hz, CH-2'); 107.31 (C-4a); 113.41 (CH-4-furyl); 113.80 (CH-8); 115.73 (CH-3-furyl); 120.59 (C-4b); 124.01 (CH-5); 126.99 (C-6); 128.16 (CH-7); 136.93 (C-8a); 147.16 (CH-5-furyl); 148.18 (C-4); 152.30 (C-2-furyl); 154.49 (CH-2); 156.56 (C-9a);  $^{19}F$  NMR (470.4 MHz, DMSO- $d_6$ ): -198.06 (ddd, 1F,  $J_{F,2'} = 53.9$  Hz,  $J_{F,1'} = 19.8$  Hz,  $J_{F,3'} = 14.3$  Hz, F-2'); IR (ATR):  $\nu = 3313, 2936, 1571, 1544, 1466, 1441, 1048, 802, 750, 595, 537$  cm<sup>-1</sup>; ESI MS  $m/z$  (rel. %): 426 (100) [M+Na]<sup>+</sup>, 404 (27) [M+H]<sup>+</sup>; HR MS (ESI) for C<sub>19</sub>H<sub>15</sub>O<sub>4</sub>N<sub>3</sub>ClFNa [M+Na]<sup>+</sup>: calcd 426.06273; found 426.06275.

**6-Chloro-9-(2-deoxy-2-fluoro- $\beta$ -D-ribofuranosyl)-4-(furan-3-yl)-9H-pyrimido-[4,5-*b*]indole (23f)**

Nucleoside **22** (130 mg, 0.35 mmol) was reacted with furan-3-boronic acid (59 mg, 0.53 mmol) in 4 mL of H<sub>2</sub>O/MeCN (2:1) for 2 h according to the general procedure A. Recrystallization from H<sub>2</sub>O/MeOH mixture gave nucleoside **23f** (70 mg, 50%) as a white solid: m.p. 184–186 °C;  $[\alpha]_{\text{D}}^{20}$  –33.5 (c 0.21, DMSO); <sup>1</sup>H NMR (500.0 MHz, DMSO-*d*<sub>6</sub>): 3.62 (ddd, 1H,  $J_{\text{gem}} = 12.3$  Hz,  $J_{5'a,OH} = 5.5$  Hz,  $J_{5'a,4'} = 4.5$  Hz, H-5'a); 3.75 (ddd, 1H,  $J_{\text{gem}} = 12.3$  Hz,  $J_{5'b,OH} = 5.4$  Hz,  $J_{5'b,4'} = 2.6$  Hz, H-5'b); 4.02 (dddd, 1H,  $J_{4',3'} = 6.2$ ,  $J_{4',5'a} = 4.5$  Hz,  $J_{4',5'b} = 2.6$  Hz,  $J_{4',F} = 1.2$  Hz, H-4'); 4.64 (dtd, 1H,  $J_{3',F} = 14.0$  Hz,  $J_{3',4'} = J_{3',OH} = 6.2$  Hz,  $J_{3',2'} = 5.2$  Hz, H-3'); 5.09 (t, 1H,  $J_{OH,5'} = 5.4$  Hz, OH-5'); 5.74 (ddd, 1H,  $J_{2',F} = 53.8$  Hz,  $J_{2',3'} = 5.5$  Hz,  $J_{2',1'} = 4.1$  Hz, H-2'); 5.77 (bd, 1H,  $J_{OH,3'} = 6.2$  Hz, OH-3'); 6.75 (dd, 1H,  $J_{1',F} = 19.4$  Hz,  $J_{1',2'} = 4.1$  Hz, H-1'); 7.12 (dd, 1H,  $J_{4,5} = 1.9$  Hz,  $J_{4,2} = 0.9$  Hz, H-4-furyl); 7.63 (dd, 1H,  $J_{7,8} = 8.9$  Hz,  $J_{7,5} = 2.1$  Hz, H-7); 8.02 (t, 1H,  $J_{5,2} = J_{5,4} = 1.7$  Hz, H-5-furyl); 8.10 (d, 1H,  $J_{5,7} = 2.1$  Hz, H-5); 8.12 (d, 1H,  $J_{8,7} = 8.9$  Hz, H-8); 8.55 (dd, 1H,  $J_{2,5} = 1.6$  Hz,  $J_{2,4} = 0.9$  Hz, H-2-furyl); 9.02 (s, 1H, H-2); <sup>13</sup>C NMR (125.7 MHz, DMSO-*d*<sub>6</sub>): 60.97 (CH<sub>2</sub>-5'); 68.54 (d,  $J_{C,F} = 15.7$  Hz, CH-3'); 84.15 (CH-4'); 85.65 (d,  $J_{C,F} = 33.7$  Hz, CH-1'); 91.59 (d,  $J_{C,F} = 186.9$  Hz, CH-2'); 110.48 (C-4a); 110.75 (CH-4-furyl); 114.16 (CH-8); 120.63 (C-4b); 121.82 (CH-5); 124.32 (C-3-furyl); 126.71 (C-6); 128.10 (CH-7); 136.66 (C-8a); 144.66 (CH-2-furyl); 145.01 (CH-5-furyl); 153.43 (C-4); 154.76 (CH-2); 155.83 (C-9a); <sup>19</sup>F NMR (470.4 MHz, DMSO-*d*<sub>6</sub>): –198.88 (bdt, 1F,  $J_{F,2'} = 53.8$  Hz,  $J_{F,1'} = J_{F,3'} = 16.6$  Hz, F-2'); IR (ATR):  $\nu = 3149$ , 1570, 1471, 1440, 1293, 1109, 1070, 805, 599, 539 cm<sup>–1</sup>; ESI MS *m/z* (rel. %): 426 (100) [M+Na]<sup>+</sup>, 404 (60) [M+H]<sup>+</sup>; HR MS (ESI) for C<sub>19</sub>H<sub>16</sub>O<sub>4</sub>N<sub>3</sub>ClF [M+H]<sup>+</sup>: calcd 404.08079; found 404.08090.

**6-Chloro-9-(2-deoxy-2-fluoro- $\beta$ -D-ribofuranosyl)-4-(thiophen-2-yl)-9H-pyrimido-[4,5-*b*]indole (23g)**

Nucleoside **22** (90 mg, 0.24 mmol) was reacted with thiophene-2-boronic acid (46 mg, 0.36 mmol) in 3 mL of H<sub>2</sub>O/MeCN (2:1) for 4 h according to the general procedure A. Recrystallization from H<sub>2</sub>O/MeOH mixture furnished nucleoside **23g** (94 mg, 70%) as a tan solid: m.p. 206–211 °C;  $[\alpha]_{\text{D}}^{20}$  –37.1 (c 0.19, DMSO); <sup>1</sup>H NMR (500.0 MHz, DMSO-*d*<sub>6</sub>): 3.62 (ddd, 1H,  $J_{\text{gem}} = 12.2$ ,  $J_{5'b,OH} = 5.5$ ,  $J_{5'b,4'} = 4.6$ , H-5'b); 3.75 (ddd, 1H,  $J_{\text{gem}} = 12.2$ ,  $J_{5'a,OH} = 5.3$ ,  $J_{5'a,4'} = 2.6$ , H-5'a); 4.02 (dddd, 1H,  $J_{4',3'} = 6.3$ ,  $J_{4',5'} = 4.6$ , 2.6,  $J_{H,F} = 1.0$ , H-4'); 4.65 (dtd, 1H,  $J_{H,F} = 14.4$ ,  $J_{3',4'} = J_{3',OH} = 6.3$ ,  $J_{3',2'} = 5.4$ , H-3'); 5.09 (dd, 1H,  $J_{OH,5'} = 5.5$ , 5.3, OH-5'); 5.74 (ddd, 1H,  $J_{H,F} = 53.8$ ,  $J_{2',3'} = 5.4$ ,  $J_{2',1'} = 4.0$ , H-2'); 5.78 (d, 1H,  $J_{OH,3'} = 6.3$ , OH-3'); 6.77 (dd, 1H,  $J_{H,F} = 19.7$ ,  $J_{1',2'} = 4.0$ , H-1'); 7.43 (dd, 1H,  $J_{4,5} = 5.0$ ,  $J_{4,3} = 3.7$ , H-4-thienyl); 7.65 (dd, 1H,  $J_{7,8} = 8.8$ ,  $J_{7,5} = 2.1$ , H-7); 8.01 (dd, 1H,  $J_{5,4} = 5.0$ ,  $J_{5,3} = 1.1$ , H-5-thienyl); 8.09 (dd, 1H,  $J_{3,4} = 3.7$ ,  $J_{3,5} = 1.1$ , H-3-thienyl); 8.15 (d, 1H,  $J_{8,7} = 8.8$ ,

H-8); 8.25 (d, 1H,  $J_{5,7} = 2.1$ , H-5); 9.00 (s, 1H, H-2);  $^{13}\text{C}$  NMR (125.7 MHz, DMSO- $d_6$ ): 60.95 (CH<sub>2</sub>-5'); 68.52 (d,  $J_{\text{C,F}} = 15.6$ , CH-3'); 84.11 (CH-4'); 85.75 (d,  $J_{\text{C,F}} = 34.0$ , CH-1'); 91.67 (d,  $J_{\text{C,F}} = 186.8$ , CH-2'); 109.17 (C-4a); 114.26 (CH-8); 120.52 (C-4b); 121.55 (CH-5); 126.67 (C-6); 128.30 (CH-7); 128.80 (CH-4-thienyl); 130.17 (CH-3-thienyl); 131.84 (CH-5-thienyl); 136.80 (C-8a); 140.94 (C-2-thienyl); 153.70 (C-4); 154.52 (CH-2); 156.24 (C-9a);  $^{19}\text{F}$  NMR (470.4 MHz, DMSO- $d_6$ ): -198.28 (ddd,  $J_{\text{F,H}} = 53.8, 19.7, 14.4$ ); IR (ATR):  $\nu = 3090, 1569, 1443, 1291, 1051, 965, 804, 717, 539, 436\text{ cm}^{-1}$ ; ESI MS  $m/z$  (rel. %): 420 (100) [M+H]<sup>+</sup>, 442 (79) [M+Na]<sup>+</sup>; HR MS (ESI) for C<sub>19</sub>H<sub>16</sub>O<sub>3</sub>N<sub>3</sub>ClFS [M+H]<sup>+</sup>: calcd 420.05794; found 420.05797.

### **6-Chloro-9-(2-deoxy-2-fluoro- $\beta$ -D-ribofuranosyl)-4-(thiophen-3-yl)-9H-pyrimido-[4,5-*b*]indole (23h)**

Nucleoside **22** (130 mg, 0.35 mmol) was reacted with thiophene-3-boronic acid (67 mg, 0.52 mmol) in 4 mL of H<sub>2</sub>O/MeCN (2:1) for 2 h according to the general procedure A. Recrystallization from H<sub>2</sub>O/MeOH mixture gave nucleoside **23h** (58 mg, 40%) as a beige solid: m.p. 221–222 °C;  $[\alpha]_{\text{D}}^{20} -32.7$  (c 0.16, DMSO);  $^1\text{H}$  NMR (500.0 MHz, DMSO- $d_6$ ): 3.62 (dd, 1H,  $J_{\text{gem}} = 12.2$  Hz,  $J_{5'a,4'} = 4.5$  Hz, H-5'a); 3.75 (dd, 1H,  $J_{\text{gem}} = 12.2$  Hz,  $J_{5'b,4'} = 2.6$  Hz, H-5'b); 4.02 (m, 1H, H-4'); 4.65 (m, 1H, H-3'); 5.08 (bs, 1H, OH-5'); 5.75 (ddd, 1H,  $J_{2',\text{F}} = 53.9$  Hz,  $J_{2',3'} = 5.5$  Hz,  $J_{2',1'} = 4.1$  Hz, H-2'); 5.76 (bd, 1H,  $J_{\text{OH},3'} = 5.7$  Hz, OH-3'); 6.77 (dd, 1H,  $J_{1',\text{F}} = 19.5$  Hz,  $J_{1',2'} = 4.1$  Hz, H-1'); 7.62 (dd, 1H,  $J_{7,8} = 8.9$  Hz,  $J_{7,5} = 2.1$  Hz, H-7); 7.67 (dd, 1H,  $J_{4,5} = 5.0$  Hz,  $J_{4,2} = 1.3$  Hz, H-4-thienyl); 7.89 (dd, 1H,  $J_{5,4} = 5.0$  Hz,  $J_{5,2} = 2.9$  Hz, H-5-thienyl); 7.96 (d, 1H,  $J_{5,7} = 2.1$  Hz, H-5); 8.13 (d, 1H,  $J_{8,7} = 8.9$  Hz, H-8); 8.33 (dd, 1H,  $J_{2,5} = 2.9$  Hz,  $J_{2,4} = 1.3$  Hz, H-2-thienyl); 9.04 (s, 1H, H-2);  $^{13}\text{C}$  NMR (125.7 MHz, DMSO- $d_6$ ): 60.95 (CH<sub>2</sub>-5'); 68.51 (d,  $J_{\text{C,F}} = 15.6$  Hz, CH-3'); 84.11 (CH-4'); 85.65 (d,  $J_{\text{C,F}} = 33.8$  Hz, CH-1'); 91.59 (d,  $J_{\text{C,F}} = 186.9$  Hz, CH-2'); 110.40 (C-4a); 114.17 (CH-8); 120.70 (C-4b); 121.64 (CH-5); 126.54 (C-6); 128.00 (CH-5-thienyl); 128.08 (CH-7); 128.16 (CH-4-thienyl); 128.79 (CH-2-thienyl); 136.72 (C-8a); 139.06 (C-3-thienyl); 154.73 (CH-2); 155.83 and 155.92 (C-4, 9a);  $^{19}\text{F}$  NMR (470.4 MHz, DMSO- $d_6$ ): -198.49 (ddd, 1F,  $J_{\text{F},2'} = 53.9$  Hz,  $J_{\text{F},1'} = 19.3$  Hz,  $J_{\text{F},3'} = 14.8$  Hz, F-2'); IR (ATR):  $\nu = 3068, 1570, 1445, 1291, 1093, 1050, 1028, 969, 888, 840, 688, 538, 497\text{ cm}^{-1}$ ; ESI MS  $m/z$  (rel. %): 442 (100) [M+Na]<sup>+</sup>, 420 (87) [M+H]<sup>+</sup>; HR MS (ESI) for C<sub>19</sub>H<sub>15</sub>O<sub>3</sub>N<sub>3</sub>ClFNaS [M+Na]<sup>+</sup>: calcd 442.03989; found 442.03990.

### **6-Chloro-9-(2-deoxy-2-fluoro- $\beta$ -D-ribofuranosyl)-4-phenyl-9H-pyrimido-[4,5-*b*]indole (23i)**

Nucleoside **22** (130 mg, 0.35 mmol) was reacted with phenylboronic acid (59 mg, 0.48 mmol) in 4 mL of H<sub>2</sub>O/MeCN (2:1) for 2 h according to the general procedure A. Recrystallization from



H<sub>2</sub>O/MeOH mixture gave nucleoside **23i** (59 mg, 41%) as a tan solid: m.p. 192–193 °C;  $[\alpha]_D^{20}$  –44.8 (c 0.20, DMSO); <sup>1</sup>H NMR (500.0 MHz, DMSO-*d*<sub>6</sub>): 3.63 (ddd, 1H,  $J_{gem} = 12.2$  Hz,  $J_{5'a,OH} = 5.6$  Hz,  $J_{5'a,4'} = 4.6$  Hz, H-5'a); 3.76 (ddd, 1H,  $J_{gem} = 12.2$  Hz,  $J_{5'b,OH} = 5.3$  Hz,  $J_{5'b,4'} = 2.6$  Hz, H-5'b); 4.03 (dddd, 1H,  $J_{4',3'} = 6.2$ ,  $J_{4',5'a} = 4.6$  Hz,  $J_{4',5'b} = 2.6$  Hz,  $J_{4',F} = 1.1$  Hz, H-4'); 4.66 (dtd, 1H,  $J_{3',F} = 14.2$  Hz,  $J_{3',4'} = J_{3',OH} = 6.2$  Hz,  $J_{3',2'} = 5.5$  Hz, H-3'); 5.10 (bt, 1H,  $J_{OH,5'} = 5.4$  Hz, OH-5'); 5.76 (ddd, 1H,  $J_{2',F} = 53.9$  Hz,  $J_{2',3'} = 5.5$  Hz,  $J_{2',1'} = 4.1$  Hz, H-2'); 5.78 (bd, 1H,  $J_{OH,3'} = 6.2$  Hz, OH-3'); 6.77 (dd, 1H,  $J_{1',F} = 19.5$  Hz,  $J_{1',2'} = 4.1$  Hz, H-1'); 7.61 (dd, 1H,  $J_{7,8} = 8.9$  Hz,  $J_{7,5} = 2.2$  Hz, H-7); 7.66–7.72 (m, 4H, H-*m,p*-Ph, H-5); 7.89 (m, 2H, H-*o*-Ph); 8.13 (d, 1H,  $J_{8,7} = 8.9$  Hz, H-8); 9.10 (s, 1H, H-2); <sup>13</sup>C NMR (125.7 MHz, DMSO-*d*<sub>6</sub>): 60.98 (CH<sub>2</sub>-5'); 68.56 (d,  $J_{C,F} = 15.6$  Hz, CH-3'); 84.15 (CH-4'); 85.72 (d,  $J_{C,F} = 33.8$  Hz, CH-1'); 91.65 (d,  $J_{C,F} = 187.0$  Hz, CH-2'); 110.66 (C-4a); 114.30 (CH-8); 120.67 (C-4b); 121.46 (CH-5); 126.50 (C-6); 128.19 (CH-7); 128.96 (CH-*o*-Ph); 129.16 (CH-*m*-Ph); 130.82 (CH-*p*-Ph); 136.83 (C-8a); 137.63 (C-*i*-Ph); 154.88 (CH-2); 155.86 (C-9a); 160.56 (C-4); <sup>19</sup>F NMR (470.4 MHz, DMSO-*d*<sub>6</sub>): –198.45 (ddd, 1F,  $J_{F,2'} = 53.9$  Hz,  $J_{F,1'} = 19.5$  Hz,  $J_{F,3'} = 14.2$  Hz, F-2'); IR (ATR):  $\nu = 3311, 1565, 1473, 1071, 1049, 814, 766, 705, 659, 605, 556, 515, 441$  cm<sup>–1</sup>; ESI MS *m/z* (rel. %): 436 (100) [M+Na]<sup>+</sup>, 414 (68) [M+H]<sup>+</sup>; HR MS (ESI) for C<sub>21</sub>H<sub>17</sub>O<sub>3</sub>N<sub>3</sub>ClFNa [M+Na]<sup>+</sup>: calcd 436.08347; found 436.08348.

## HPLC Purity of Final Compounds

Supplementary Table S1. HPLC Purity of Final Compounds

| Compound | t <sub>r</sub> [min] | Purity [%] |
|----------|----------------------|------------|
| 9a       | 13.13                | 99.27      |
| 9b       | 15.17                | 98.63      |
| 9c       | 15.91                | 99.64      |
| 9d       | 13.90                | 99.87      |
| 9e       | 15.29                | 98.59      |
| 9f       | 14.81                | 96.36      |
| 9g       | 15.71                | 99.88      |
| 9h       | 15.32                | 99.59      |
| 9i       | 15.57                | 99.93      |
| 16       | 14.05                | 98.88      |
| 17a      | 12.52                | 96.09      |
| 17b      | 14.04                | 99.56      |
| 17c      | 14.60                | 100.0      |
| 17d      | 13.04                | 99.00      |
| 17e      | 14.16                | 97.03      |
| 17f      | 13.83                | 96.70      |
| 17g      | 14.54                | 98.80      |
| 17h      | 14.26                | 98.86      |
| 17i      | 14.45                | 97.94      |
| 22       | 15.31                | 95.59      |
| 23a      | 13.36                | 98.92      |
| 23b      | 15.48                | 95.06      |
| 23c      | 16.23                | 99.68      |
| 23d      | 14.04                | 99.78      |
| 23e      | 15.49                | 99.08      |
| 23f      | 14.99                | 99.43      |
| 23g      | 15.91                | 98.75      |
| 23h      | 15.51                | 95.86      |
| 23i      | 15.80                | 99.72      |

Method: H<sub>2</sub>O:MeCN = 100:0 for 5 min, gradient to H<sub>2</sub>O:MeCN = 50:50 over 5 min, gradient to H<sub>2</sub>O:MeCN = 5:95 over 5 min, gradient to H<sub>2</sub>O:MeCN = 0:100 over 5 min, H<sub>2</sub>O:MeCN = 0:100 for 15 min.

## **Antiviral and cytotoxicity assays**

### **Viruses and cells**

Dengue virus type 2 (strain 16681) was obtained from Dr. Jochen Bodem, University of Wurzburg (Wurzburg, Germany), influenza virus (H1N1 A/Mexico/4108/2009) from Diagnostic Hybrids (Athens, USA), Human coxsackie B3 virus (strain Nancy) and human herpesvirus 1 (strain HF) were obtained from the American Type Culture Collection (ATCC, Manassas, USA). Madin-Darby canine kidney cells (MDCK) and HB-46 cells were obtained from ATCC, HeLa cells through the NIH AIDS Reagent Program, Division of AIDS, NIAID, NIH from Dr. Richard Axel, and Vero cells from the European Collection of Cell Cultures (Salisbury, UK). All cell lines were mycoplasma negative (routinely tested at Generi Biotech, Czech Republic) and maintained in Dulbecco's Modified Eagle's Medium (DMEM) with L-glutamine, 10 % fetal bovine serum (FBS), 100 U of penicillin/ml and 100 µg of streptomycin/ml (all Sigma-Aldrich, St. Louis, USA) in 5 % CO<sub>2</sub> at 37 °C.

### **Screening of antiviral activity**

#### **Dengue virus**

The anti-dengue activity was measured by determining the extent to which the test compounds inhibited replication in Vero cells as previously described.<sup>4</sup> Briefly, three-fold serial dilutions of compounds were added in triplicate in a 96-well plate with 20,000 Vero cells plated day before in DMEM medium. After 1 hour incubation dengue type 2 virus was added at multiplicity of infection 0.3 IU/cell. After three days of incubation cells were fixed, permeabilized, washed, incubated with DENV-2 specific antibody (harvested from HB-46 cells) overnight at 4 °C, followed by 1.5 hour incubation with Cy3-labeled donkey anti-mouse IgG (Jackson ImmunoResearch Europe) and documented using fluorescence microscope with camera (Carl Zeiss, Jena, Germany). Images were processed in ImageJ program (NIH) and drug concentrations required to reduce fluorescence by 50 % (EC<sub>50</sub>) were calculated using nonlinear regression analysis from plots of percentage of

fluorescent cells versus log<sub>10</sub> drug concentration using nonlinear regression analysis with GraphPad Prism version 7.03 for Windows (GraphPad Software, La Jolla, USA).

### **Coxsackie virus, herpes virus, influenza virus**

The anti-coxsackie, anti-herpes, anti-influenza activity was measured by determining the extent to which the test compounds inhibited virus-induced cytopathic effect in HeLa cells, Vero cells, and MDCK cells, respectively, as previously described<sup>5</sup> for anti-coxsackie activity. Briefly, three-fold serial dilutions of compounds were added in triplicate in a 96-well plate with 30,000 HeLa cells, 25,000 Vero cells, and 20,000 MDCK cells plated day before in DMEM medium with 2 % FBS, 2 % FBS, and 0.19 % bovine serum albumin with 1 µg/ml TPCK-trypsin, respectively. After one hour of incubation coxsackie virus, herpesvirus, and influenza virus was added at multiplicity of infection 0.005 IU/cell, 0.1 IU/cell, and 0.005 IU/cell, respectively. Following incubation at 37 °C in 5 % CO<sub>2</sub> incubator for two days, three days, and two days, respectively, the cell viability was determined by addition of XTT solution (Sigma-Aldrich) for 4 hours and the absorbance of newly formed orange formazan solution was measured using Victor X3 plate reader (Perkin Elmer, Waltham, USA). Drug concentrations required to reduce viral cytopathic effect by 50 % (EC<sub>50</sub>) were calculated using nonlinear regression analysis from plots of percentage cell viability versus log<sub>10</sub> drug concentration using GraphPad Prism v.7.03 (GraphPad Software).

### **HCV and RSV**

**Cell Culture.** Huh-luc replicon cells were obtained from ReBlikon GmbH (Mainz, Germany). The cell lines were cultured in Dulbeccos's modified Eagles' medium (DMEM) with GlutaMAX-I (Invitrogen, Carlsbad, CA) supplemented with 10% fetal bovine serum (FBS; HyClone, Logan, UT), 1 U/mL penicillin (Invitrogen). GT1b (consensus) and GT2a (JFH1) are authentic subgenomic replicons of the indicated strain and replicon cell lines were created as previously reported.<sup>6</sup> Luciferase HEp-2 cells (ATCC, Manassas, VI) were maintained in MEM media supplemented with 10% FBS and penicillin/streptomycin. The cells were passaged twice per week

to maintain sub-confluent densities. The cell expression was quantified after 3 days of incubation using a commercial luciferase assay (Promega, Madison, WI). RSV strain A2 was obtained from Advanced Biotechnologies (Columbia, MD).

**Antiviral EC<sub>50</sub> determination.** Determination of 50% effective concentration (EC<sub>50</sub>) was conducted in HCV replicon assay as previously described.<sup>7</sup> Briefly, replicon cells were seeded into 96-well plates. Compounds were serially diluted in DMSO at 200× final concentrations and then added to the assay plate. Luciferase expression was quantified after 3 days of incubation using a commercial luciferase assay (Promega, Madison, WI). Data were fit to the logistic dose response equation  $y = a/(1+(x/b)^c)$ , and EC<sub>50</sub> values were calculated from the resulting equations as described previously.<sup>8</sup> The anti-RSV activity was tested based on methods published previously.<sup>9</sup> Compounds were 3-fold serially diluted in source plates from which 100 nL of the diluted compound was transferred to a 384-well cell culture plate using an acoustic transfer apparatus (Echo, Labcyte, Sunnyvale, CA). HEp-2 cells at a density of 50,000 cells/mL were then infected by adding RSV strain A2 (Advanced Biotechnologies, Columbia, MD) at a titer of  $1 \times 10^{4.5}$  tissue culture infectious doses/mL. The cells were cultured for 4 days at 37°C and the RSV-induced cytopathic effect was determined by CellTiter-Glo™ Viability Reagent (Promega Biosciences, Inc., Madison, WI) using an Envision plate reader (Perkin Elmer, Waltham, MA). Data were fit to the logistic dose response equation  $y = a/(1+(x/b)^c)$  as described above.

### **Manual Modelling using Moloc**

Diphosphates derived from three aminonucleosides **9a**, **17a** and **23a** were manually docked within the known co-crystal structure of viral RNA-dependent RNA polymerase HCV NS5B genotype 2A in complex with RNA template 5'-AUCC, RNA primer 5'-PGG, Mn<sup>2+</sup> and ADP (PDB code 4WTJ).<sup>10</sup> The enzyme and RNA structures without ADP were fixed and the energy of the system

was minimized using the MAB force field,<sup>11</sup> as implemented in the computer program Moloc.

Evaluation of binding modes of all three nucleotides was done manually.







KONC JKO41.2  
 19F(1H) NMR in DMSO-d<sub>6</sub>  
 17-04-14 RA

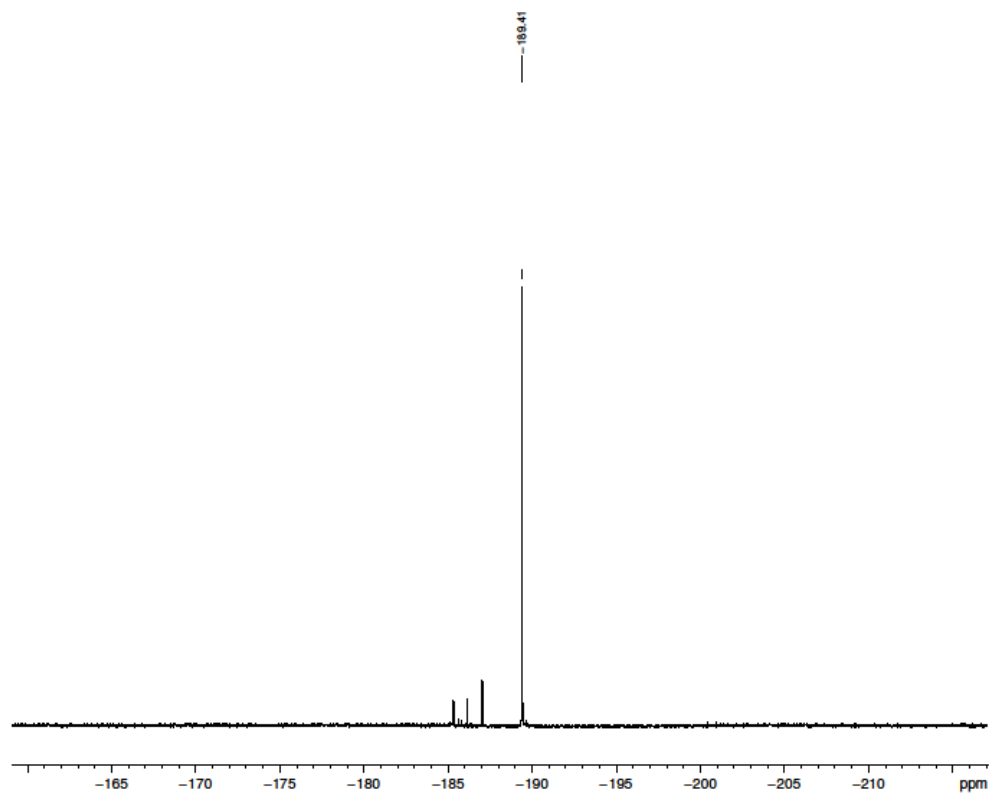

```

NAME KONC_JKO41.2
EXPNO 34
PROCNO 1
DMS 20140417
TIME 0.21
INSTRUM spect
PROBHD 5 mm TBO BB-1H
PULPROG zgpg
TD 55554
SOLVENT DMSO
NS 32
DS 0
SWH 13886.891 Hz
FIDRES 0.250007 Hz
AQ 1.0999940 sec
RG 406
DM 3.000 usec
DE 20.00 usec
TE 298.2 K
D1 1.0000000 sec
D11 0.0300000 sec
TD0 1

----- CHANNEL f1 -----
NUC1 19F
P1 12.50 usec
PL1 0.00 dB
PL1W 42.703835 W
SFO1 470.262941 MHz

----- CHANNEL f2 -----
CHPROG2 waltz16
NUC2 13C
PCPD2 30.00 usec
PL2 2.00 dB
PL12 15.00 dB
PL12W 35.7548751 W
PL12W 0.5858628 W
SFO2 400.8453687 MHz
SI 262144
SSB 470.317533 MHz
WDMW EM
SSB 0
LB 3.00 Hz
GB 0
PC 1.00
  
```

KONC JKO-197M  
 1H NMR in DMSO-d<sub>6</sub>  
 21-12-16 RA  
 \*\*\*\*\*

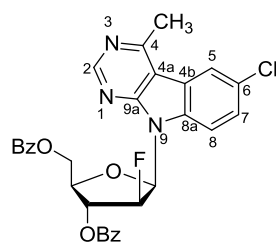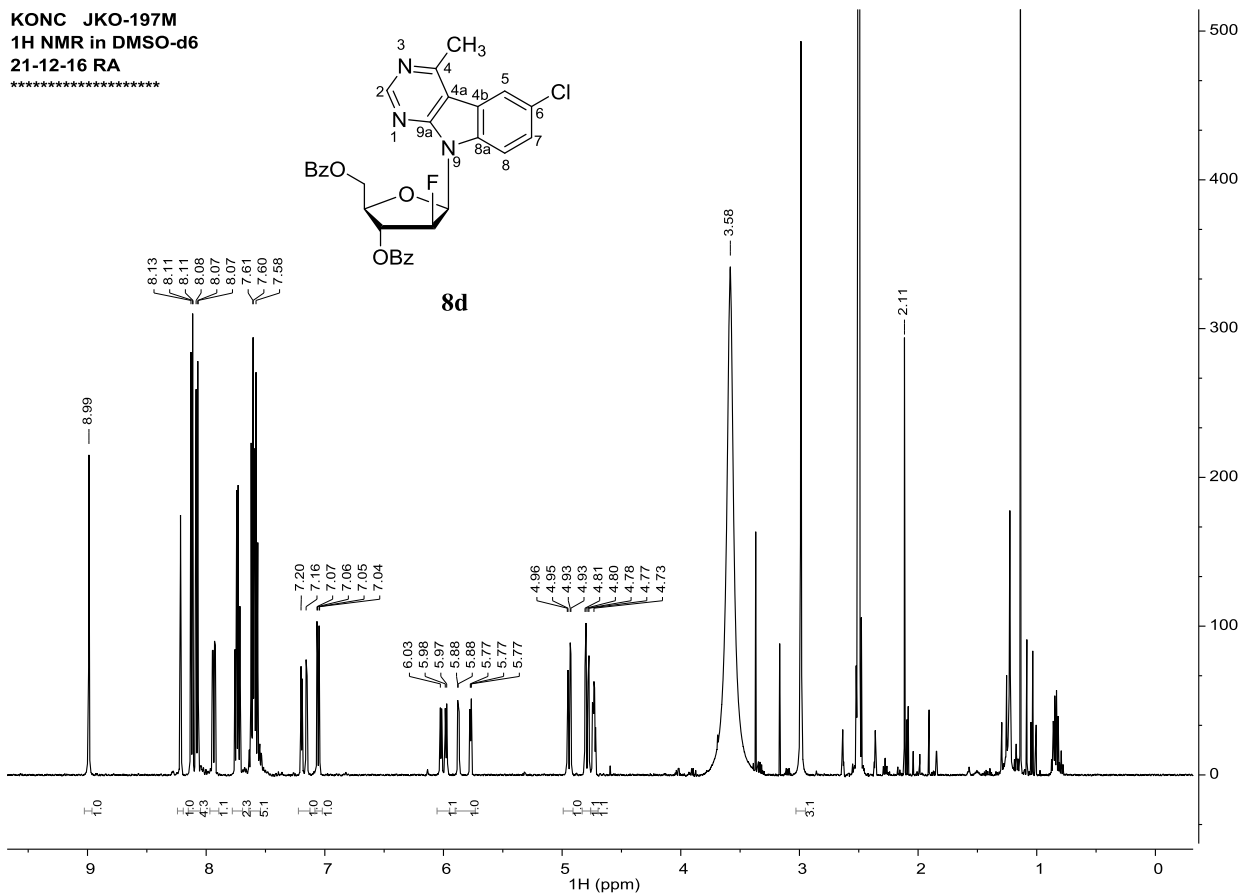

KONC JKO-197M  
APT in DMSO-d6  
21-12-16 RA  
\*\*\*\*\*

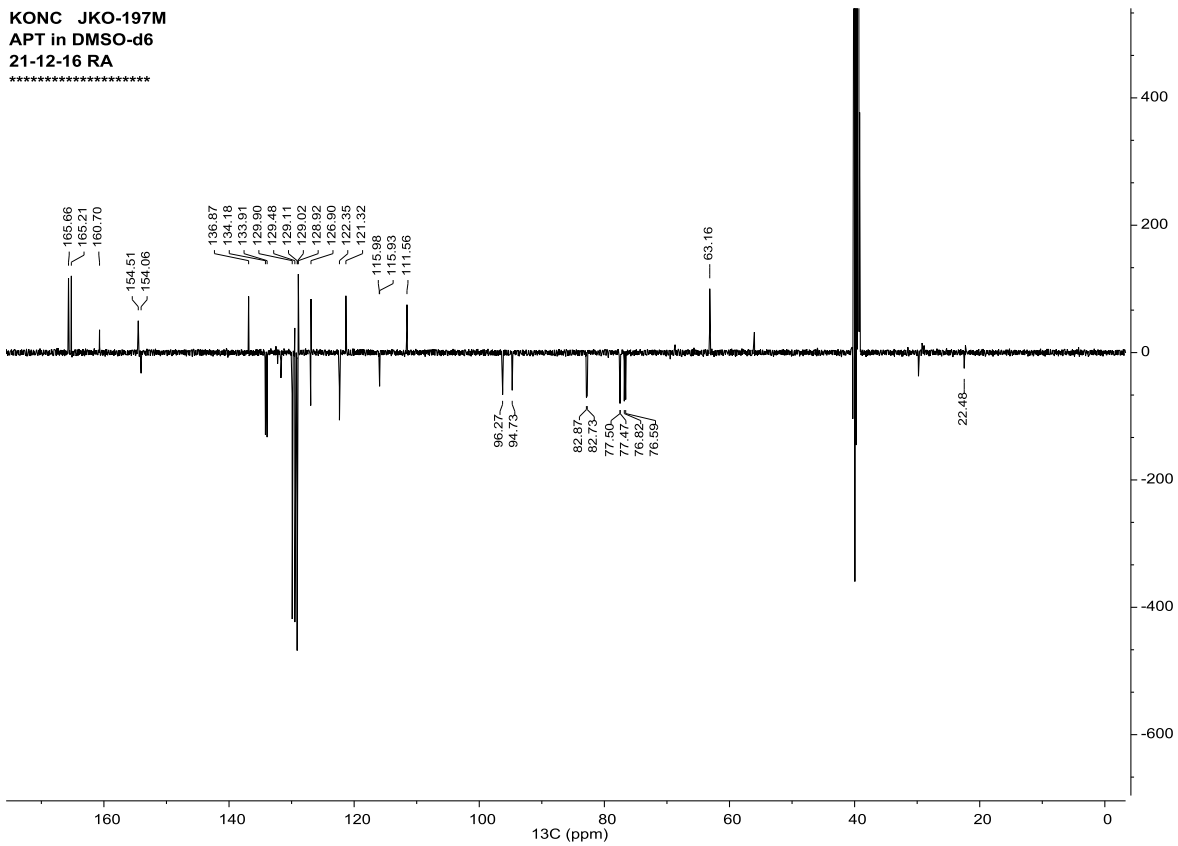

KONC JKO-197M  
19F NMR in DMSO-d6  
27-12-16 RA  
\*\*\*\*\*

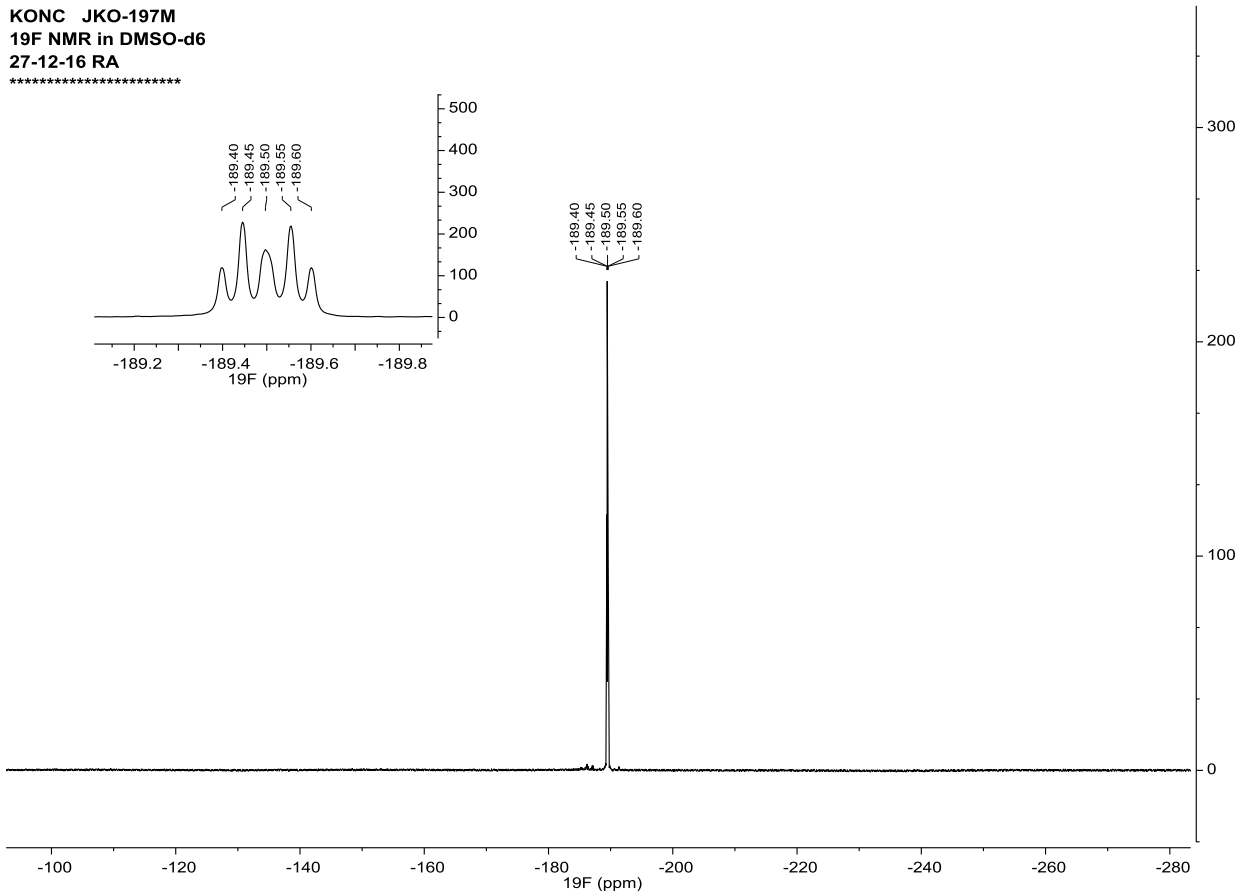



KONC JKO-230  
 19F NMR in DMSO-d6  
 27-12-16 RA

\*\*\*\*\*

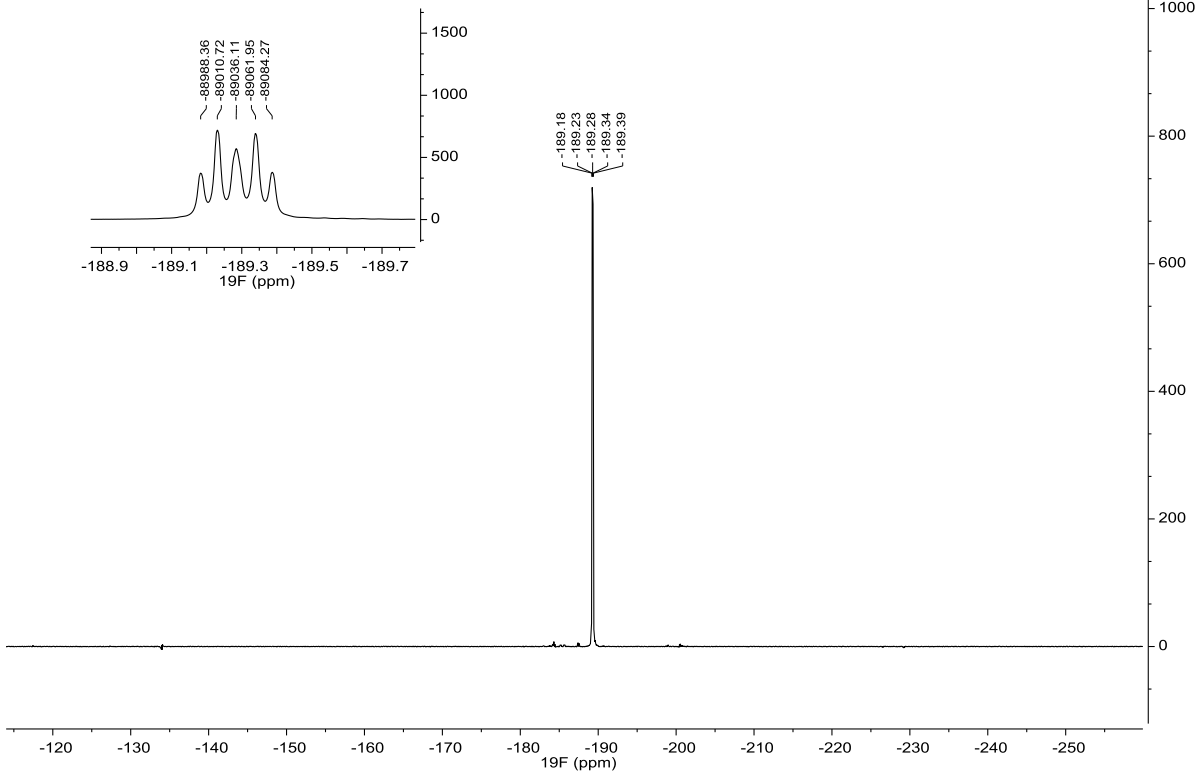

KONC JKO-49F  
 1H NMR in DMSO-d6  
 21-12-16 RA

\*\*\*\*\*

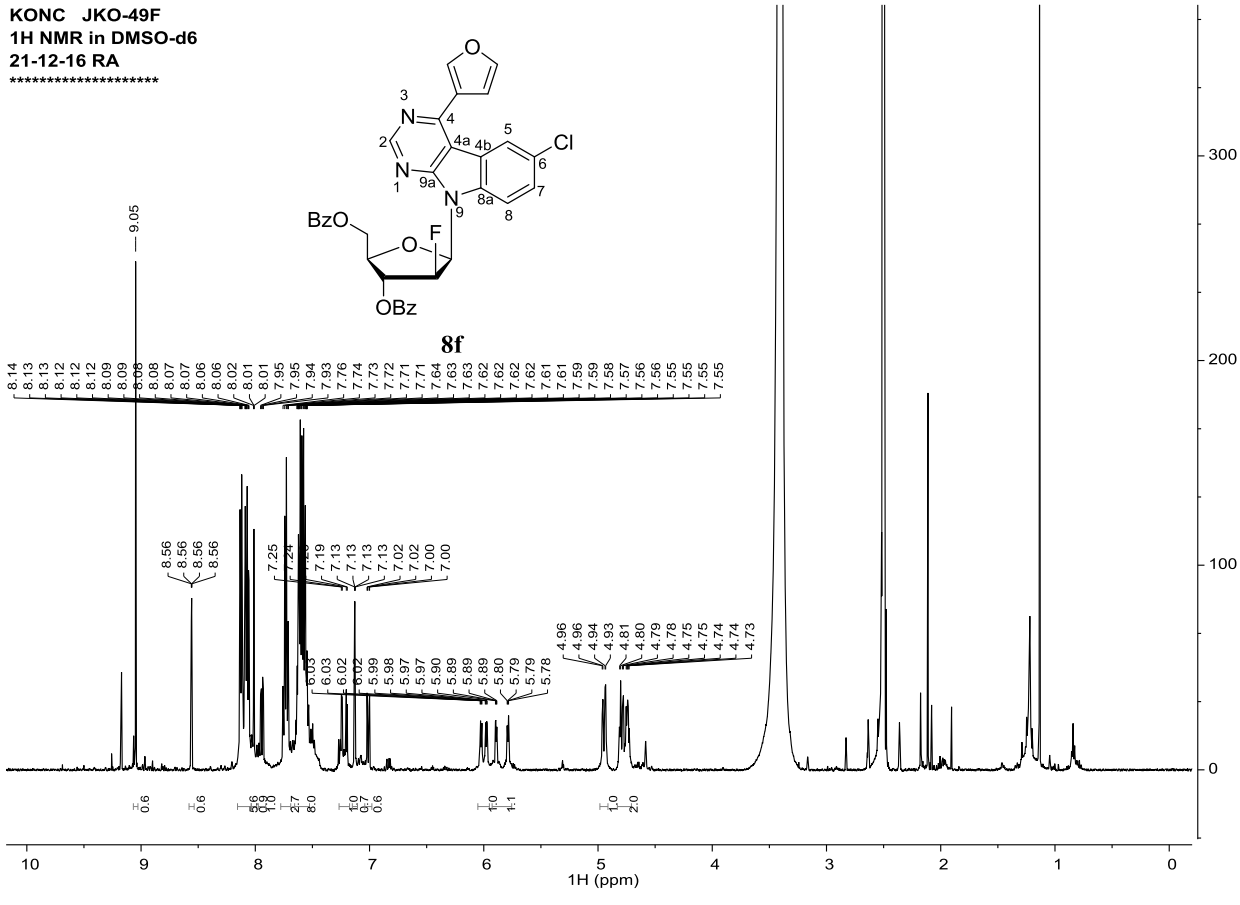

KONC JKO-49F  
APT in DMSO-d6  
21-12-16 RA  
\*\*\*\*\*

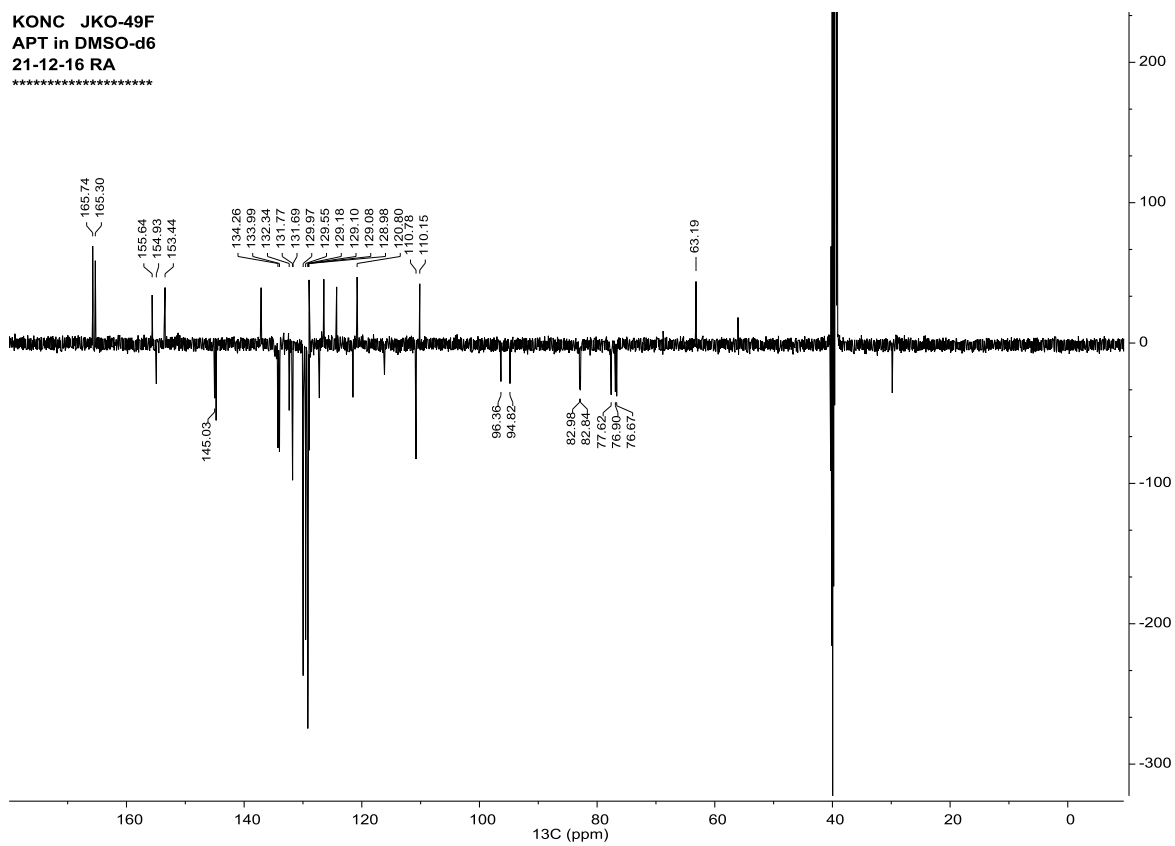

KONC JKO-49F  
19F NMR in DMSO-d6  
27-12-16 RA  
\*\*\*\*\*

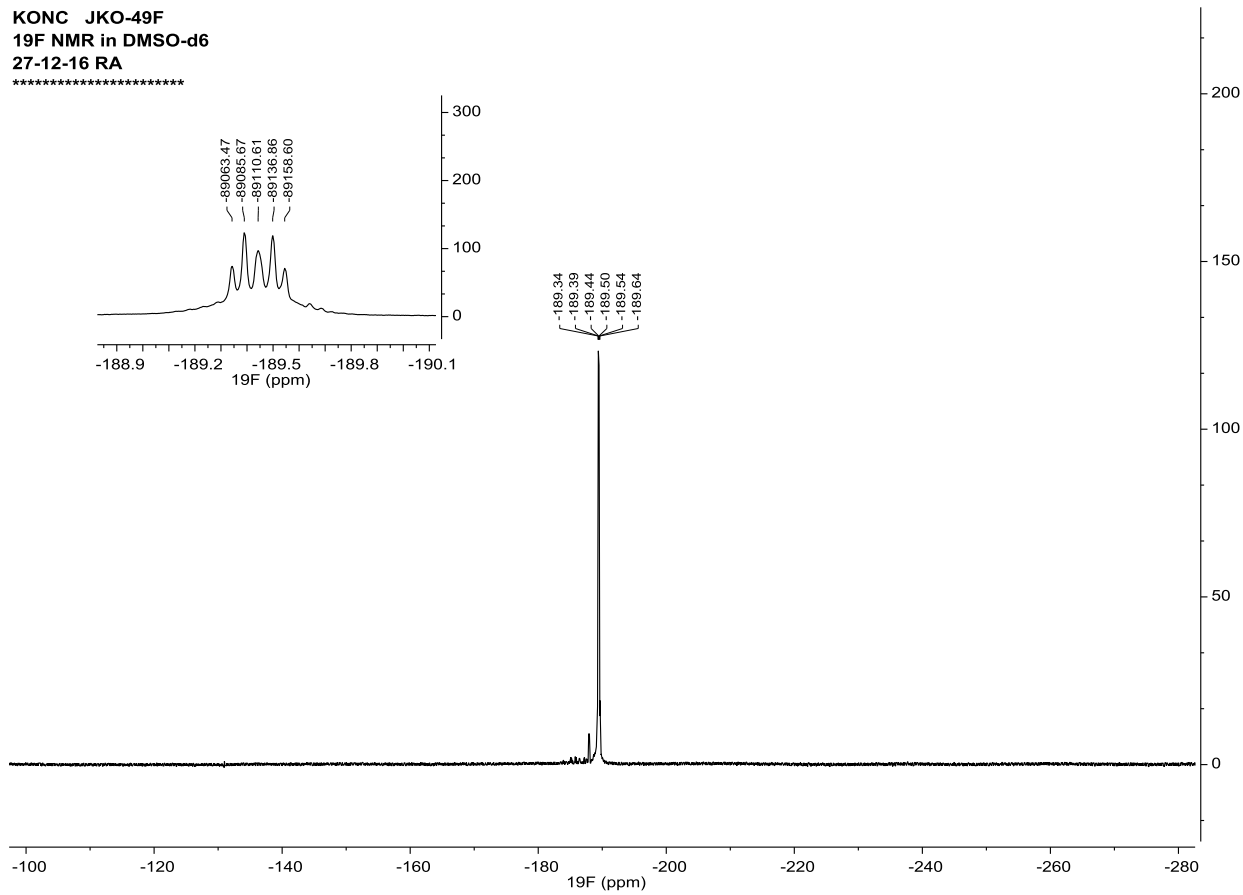





KONC JKO-220  
APT in DMSO-d6  
23-12-16 RA

\*\*\*\*\*

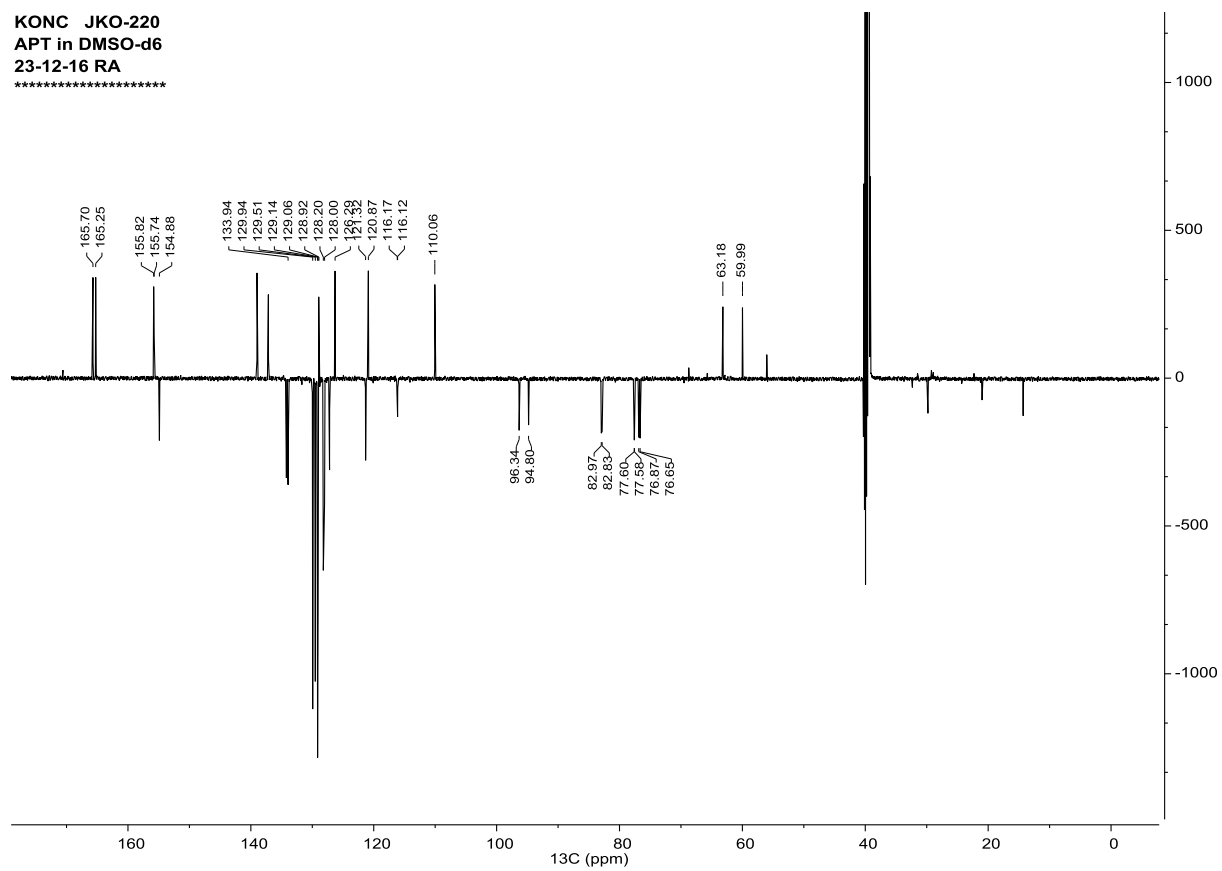

KONC JKO-220  
19F NMR in DMSO-d6  
27-12-16 RA

\*\*\*\*\*

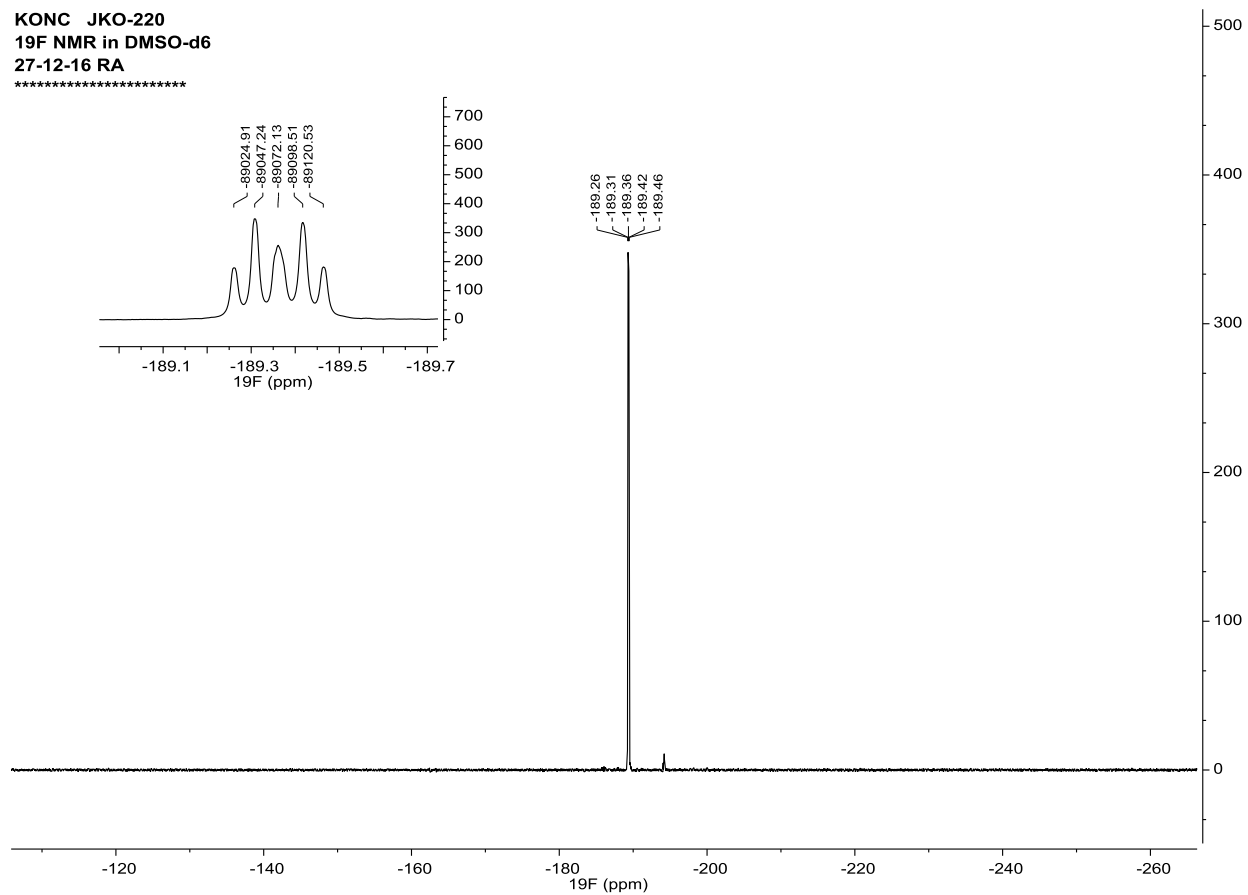



KONC JKO-219F2  
 1H NMR in DMSO-d6  
 21-12-16 RA

\*\*\*\*\*

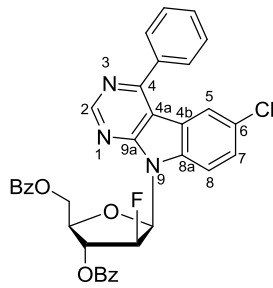

**8i**

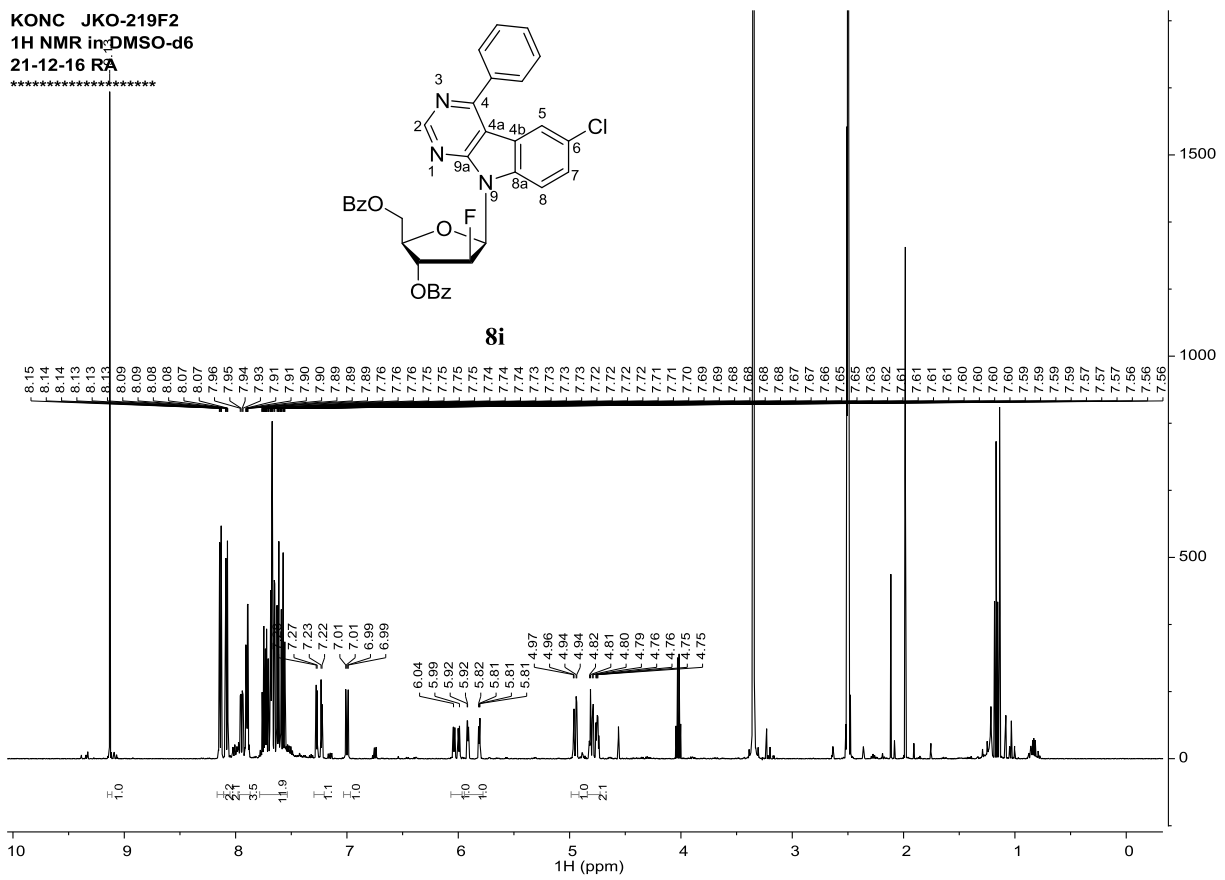

KONC JKO-219F2  
 APT in DMSO-d6  
 21-12-16 RA

\*\*\*\*\*

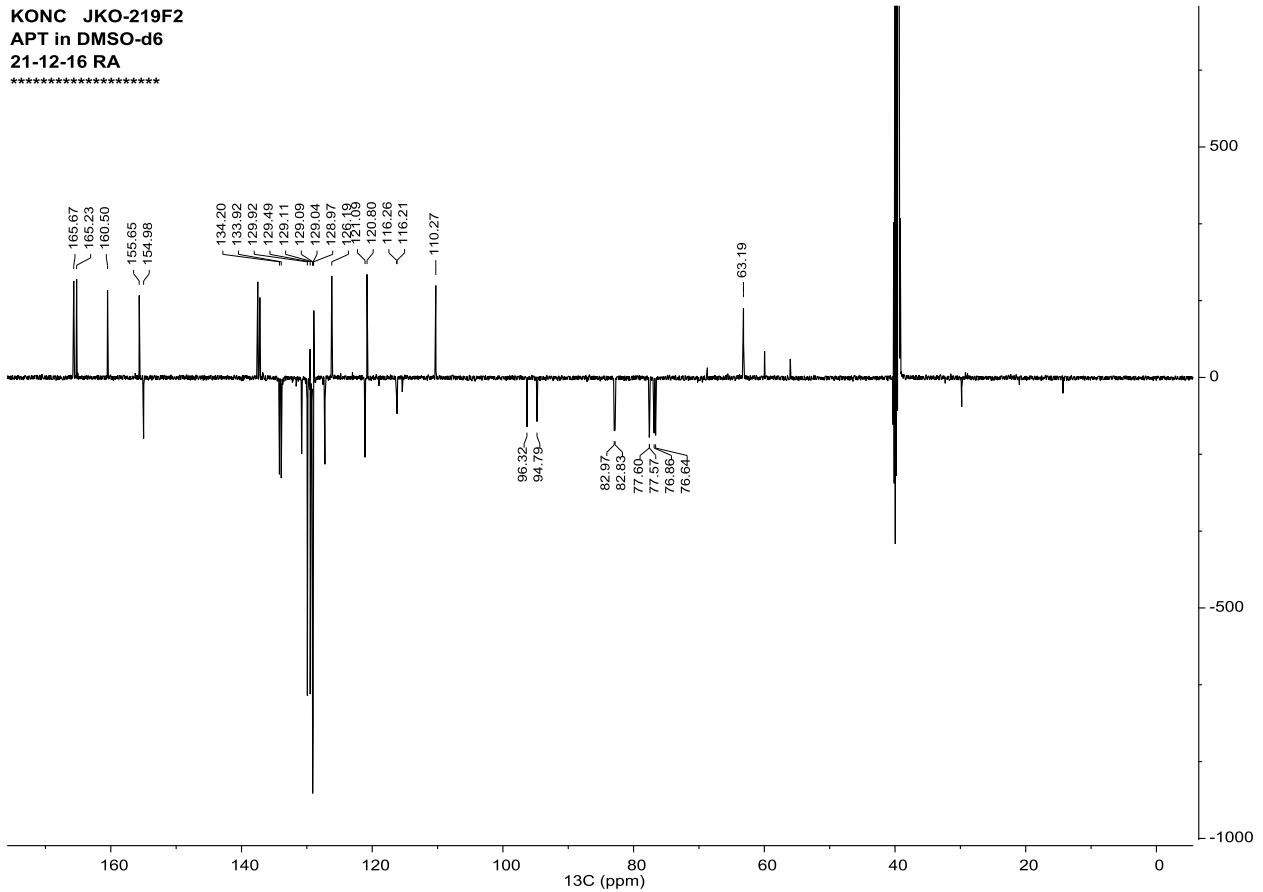

KONC JKO-219F2  
 19F NMR in DMSO-d6  
 27-12-16 RA

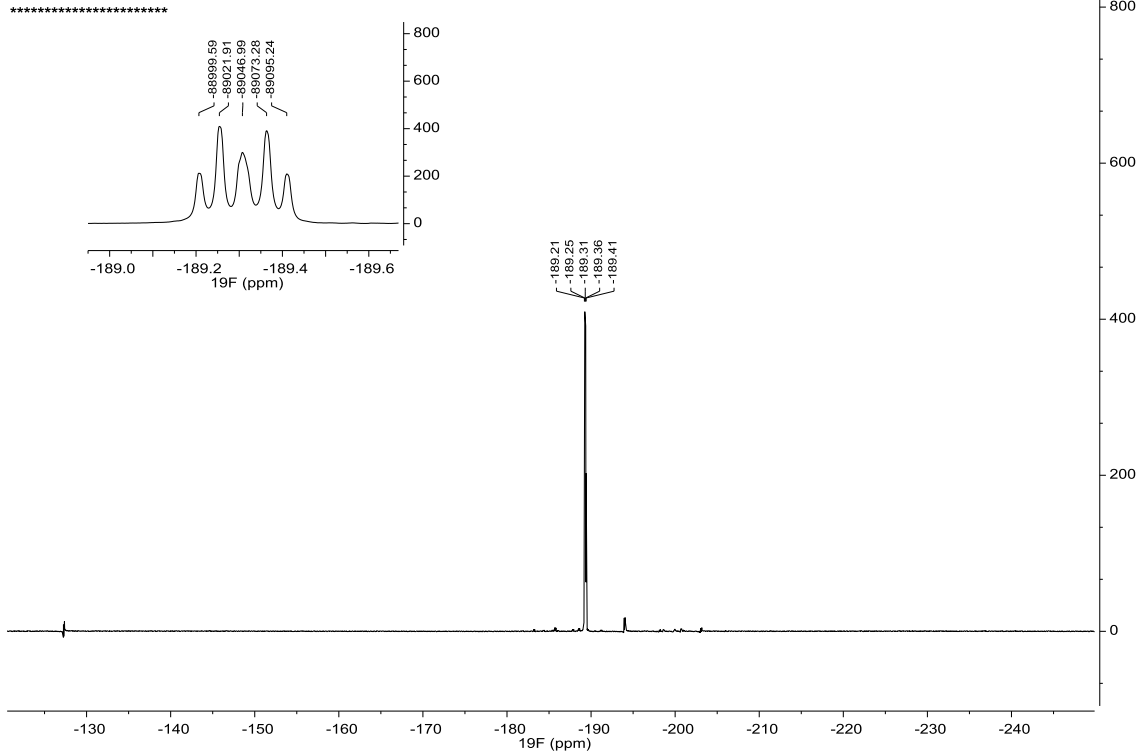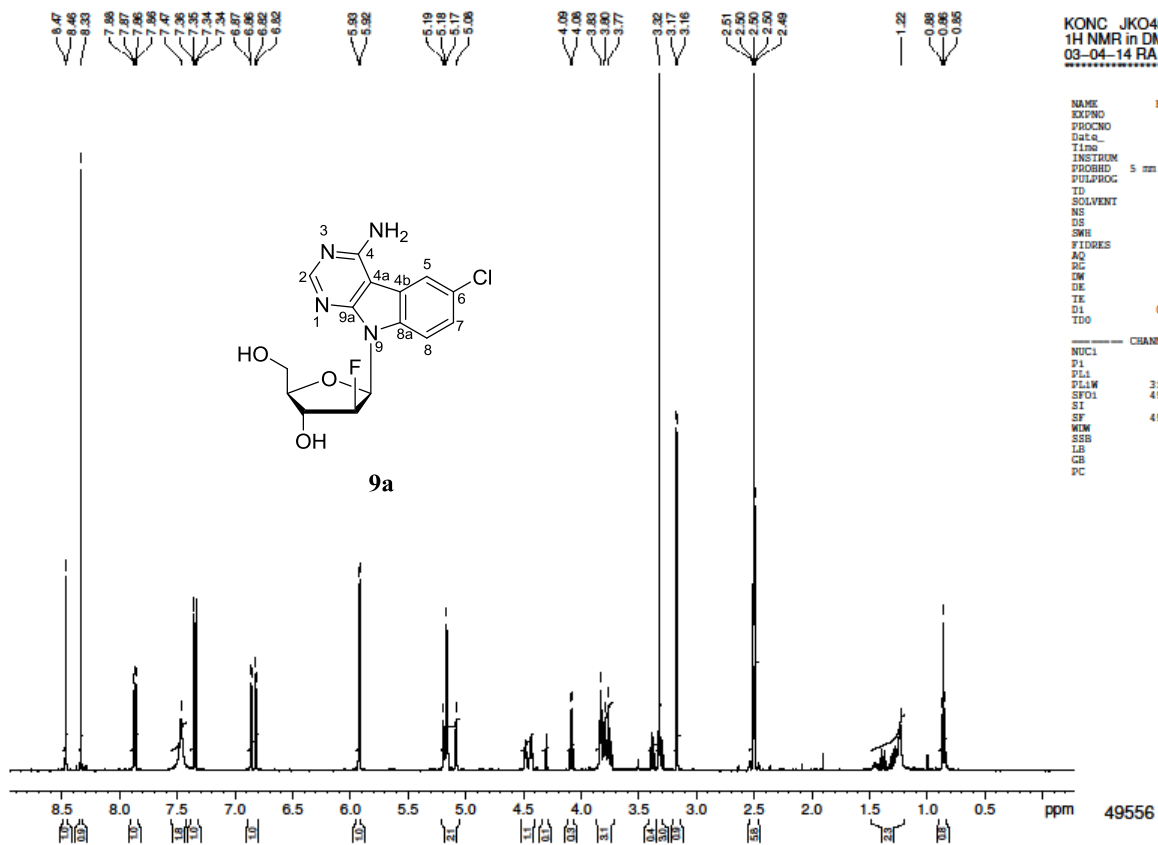

KONC JKO45  
 1H NMR in DMSO-d6  
 03-04-14 RA

```

NAME      KONC_JKO45
EXPNO     1
PROCNO    1
Data_     20140403
TIME      11.05
INSTRUM   spect
PROBHD    5 mm TBO BB-1H
PULPROG   zg30
TD         65536
SOLVENT   DMSO
NS         32
DS         0
SWH        6009.615
FIDRES    0.100004
AQ         4.9998708
RG         456
DM         83.200
DE         20.00
TE         298.2
D1         0.0000000
TD0        1
  
```

```

CHANNEL f1
NUC1      1H
P1        11.68
PL1       -2.00
PL12      31.84857368
SFO1      499.8427491
SI        131072
SF        499.8400029
WDW        ms
SSB        0
LB         0.00
GB         0
PC         40.00
  
```

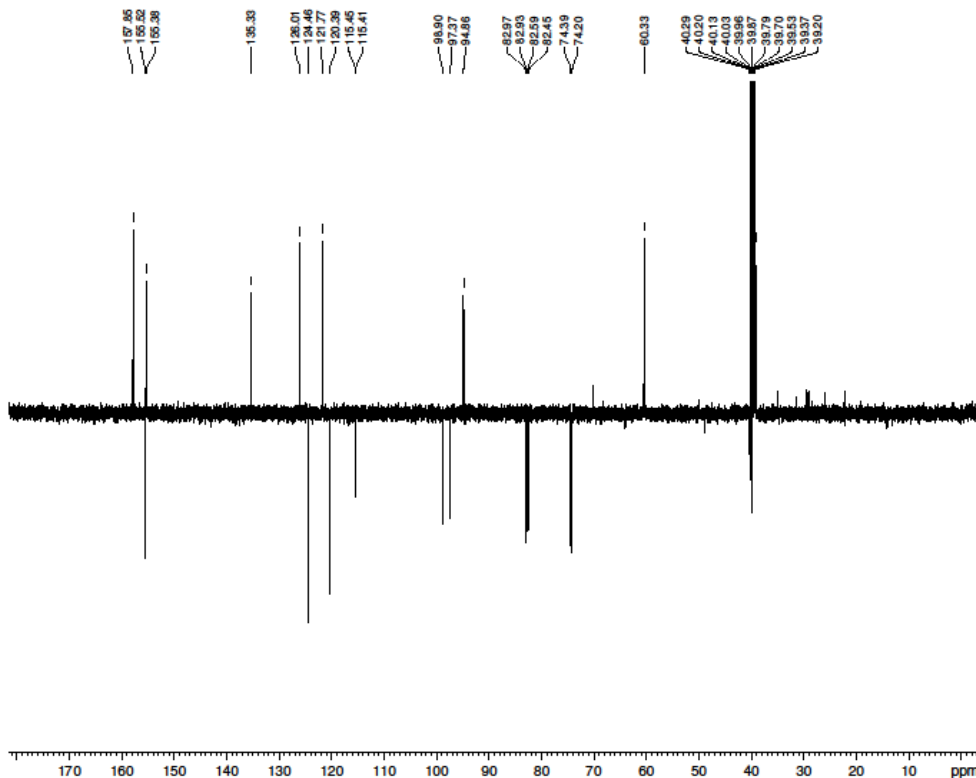

KONC JKO45  
APT in DMSO-d6  
03-04-14 RA

```

NAME      KONC_JKO45
EXPNO    2
PROCNO   1
Date_    20140403
Time     11.11
INSTRUM  spect
PROBHD   5 mm TBO BB-1H
PULPROG  gmod
TD        65536
SOLVENT  DMSO
NS        900
DS        4
SWH       29761.904 Hz
FIDRES   0.454131 Hz
AQ        1.101054 sec
RG         2050
DN         10.000 usec
DE         20.00 usec
TE        298.2 K
CNST1    180.000000
CNST1H   1.000000
D1        2.0000000 sec
D2        0.00625000 sec
TD0       1

----- CHANNEL f1 -----
NUC1      13C
P1        8.00 usec
P2        16.00 usec
PL1       -2.50 dB
PL2       19.4609526 W
PL1W      125.874363 MHz
SFO1      101.6261200 MHz

----- CHANNEL f2 -----
CPDPRG2  waltz16
NUC2      13C
PCPD2    80.00 usec
P2       -2.50 dB
PL12     14.71 dB
PL2W     31.8485738 W
PL1W     0.02704436 W
SFO2     499.8419994 MHz
SI        32072
SF        125.8849043 MHz
WDW       EM
SSB       0
LB        1.00 Hz
GB        0
PC        1.30

```

49556

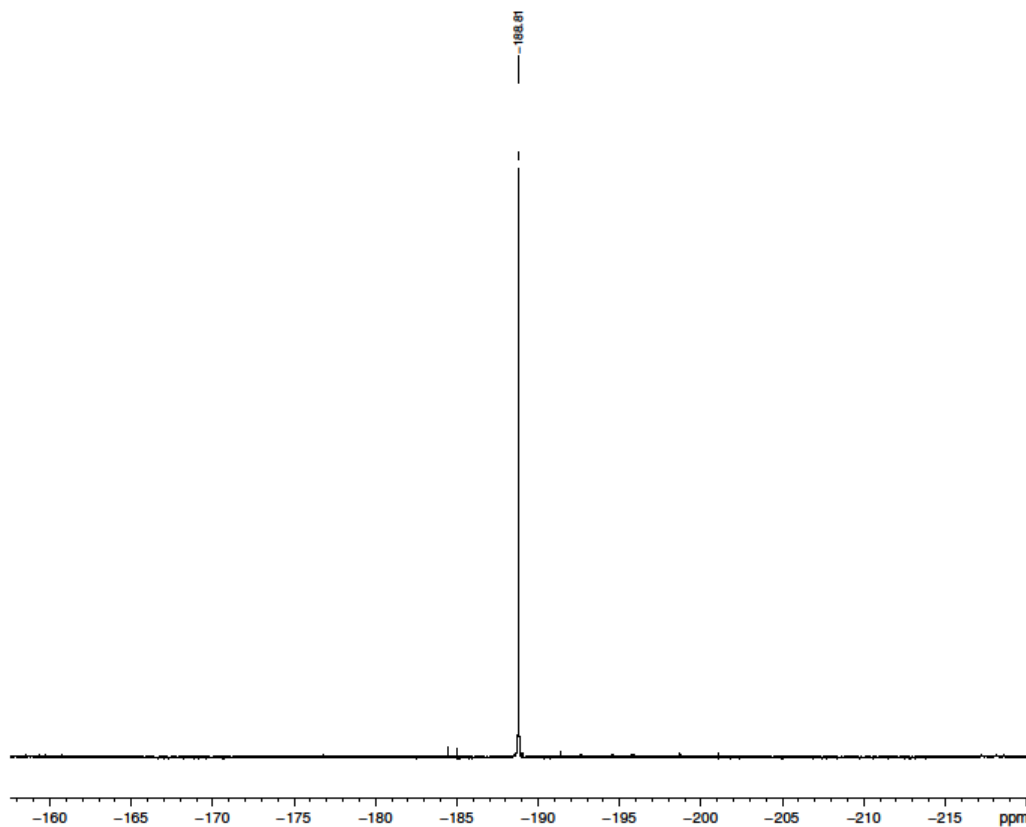

KONC JKO45  
19F(1H) NMR in DMSO-d6  
17-04-14 RA

```

NAME      KONC_JKO45
EXPNO    94
PROCNO   1
Date_    20140417
Time     9.09
INSTRUM  spect
PROBHD   5 mm TBO BB-1H
PULPROG  zgpg
TD        555540
SOLVENT  DMSO
NS        32
DS        0
SWH       138888.891 Hz
FIDRES   0.250007 Hz
AQ        1.0000040 sec
RG         408
DN         3.000 usec
DE         20.00 usec
TE        298.2 K
CNST1    1.00000000 sec
D1        0.03000000 sec
TD0       1

----- CHANNEL f1 -----
NUC1      19F
P1        12.50 usec
P2        0.00 dB
PL1W     42.70293933 W
SFO1     470.3632741 MHz

----- CHANNEL f2 -----
CPDPRG2  waltz16
NUC2      19F
PCPD2    80.00 usec
P2       -2.50 dB
PL12     15.50 dB
PL2W     35.73468781 W
PL1W     0.53853638 W
SFO2     499.8430367 MHz
SI        262144
SF        470.3175933 MHz
WDW       EM
SSB       0
LB        3.00 Hz
GB        0
PC        1.00

```

49556

KONC JKO-216  
1H NMR in DMSO-d6  
23-12-16 RA

\*\*\*\*\*

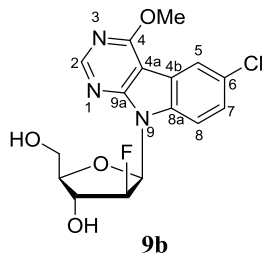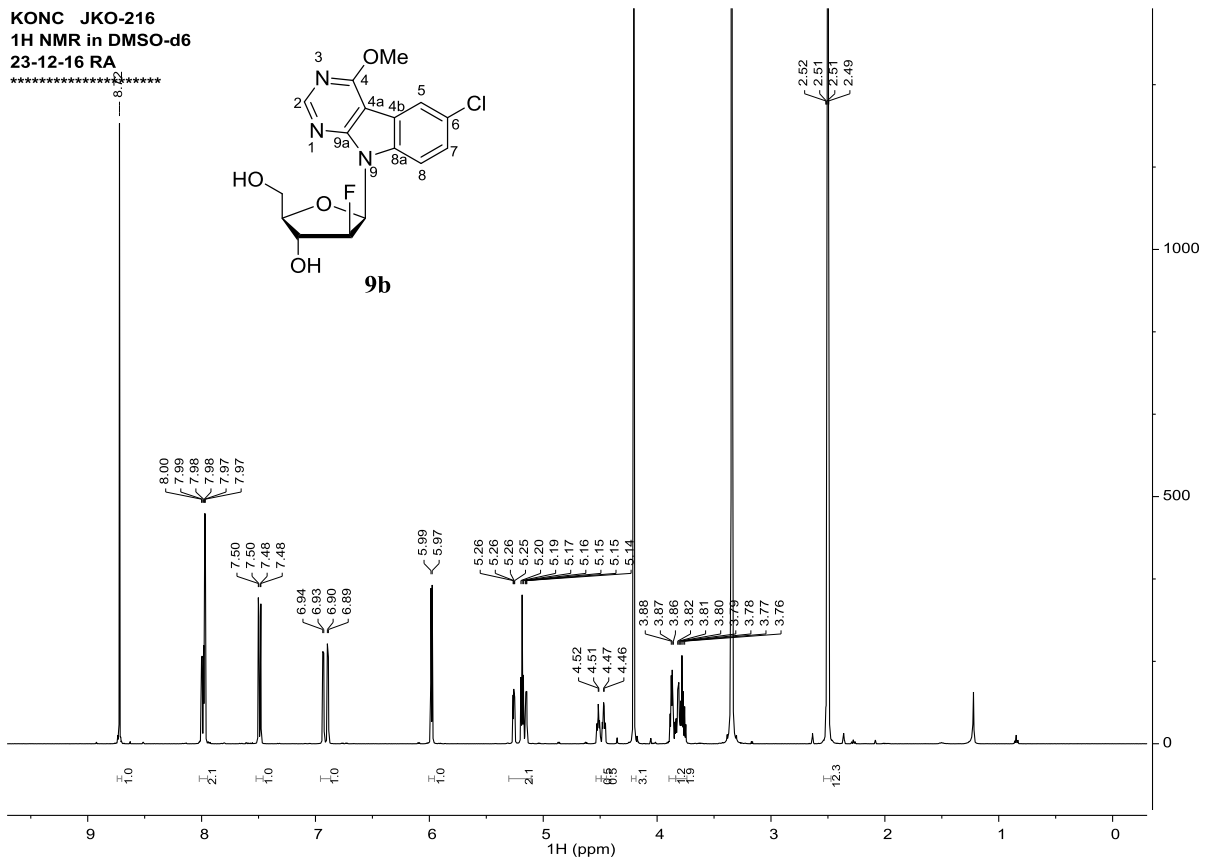

KONC JKO-216  
APT in DMSO-d6  
23-12-16 RA

\*\*\*\*\*

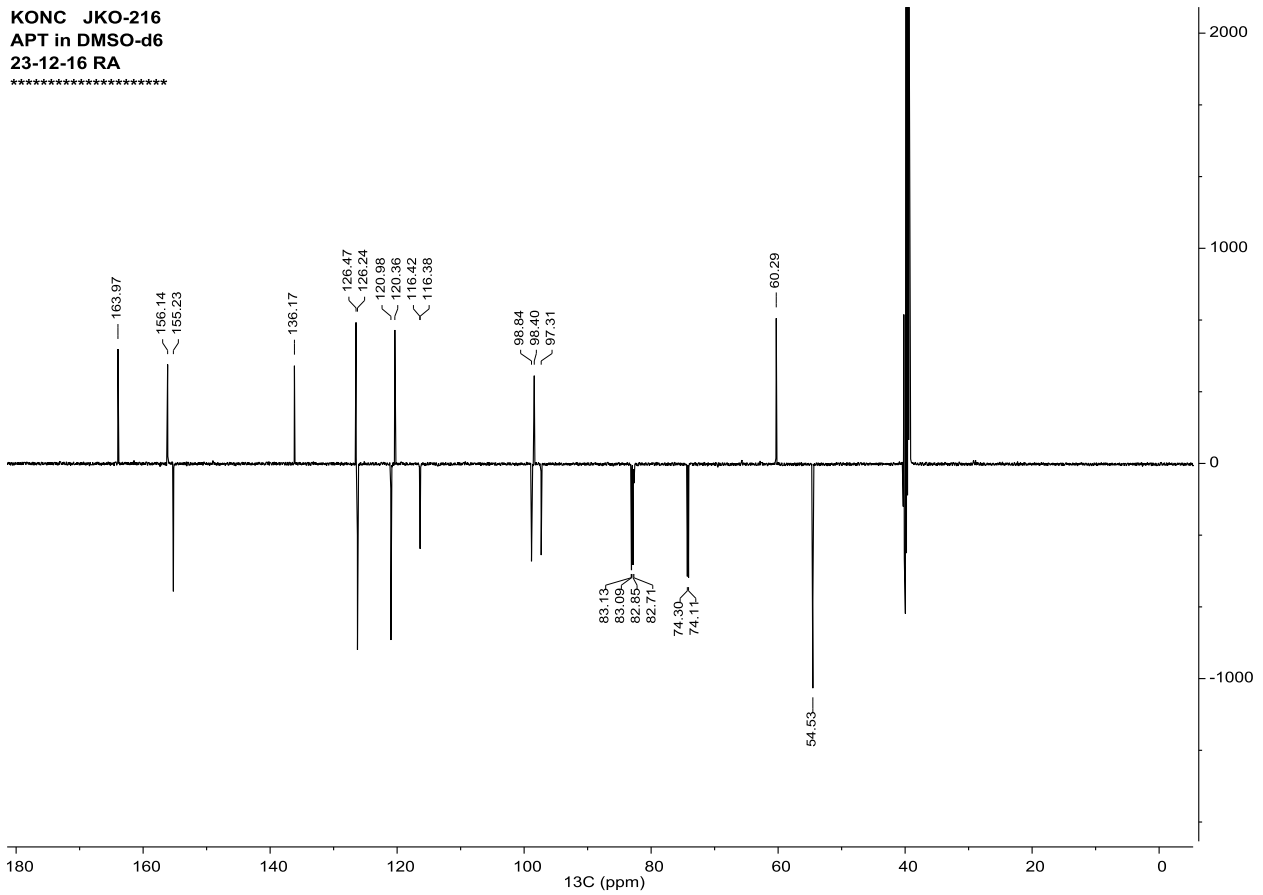

KONC JKO-216  
 19F NMR in DMSO-d6  
 27-12-16 RA

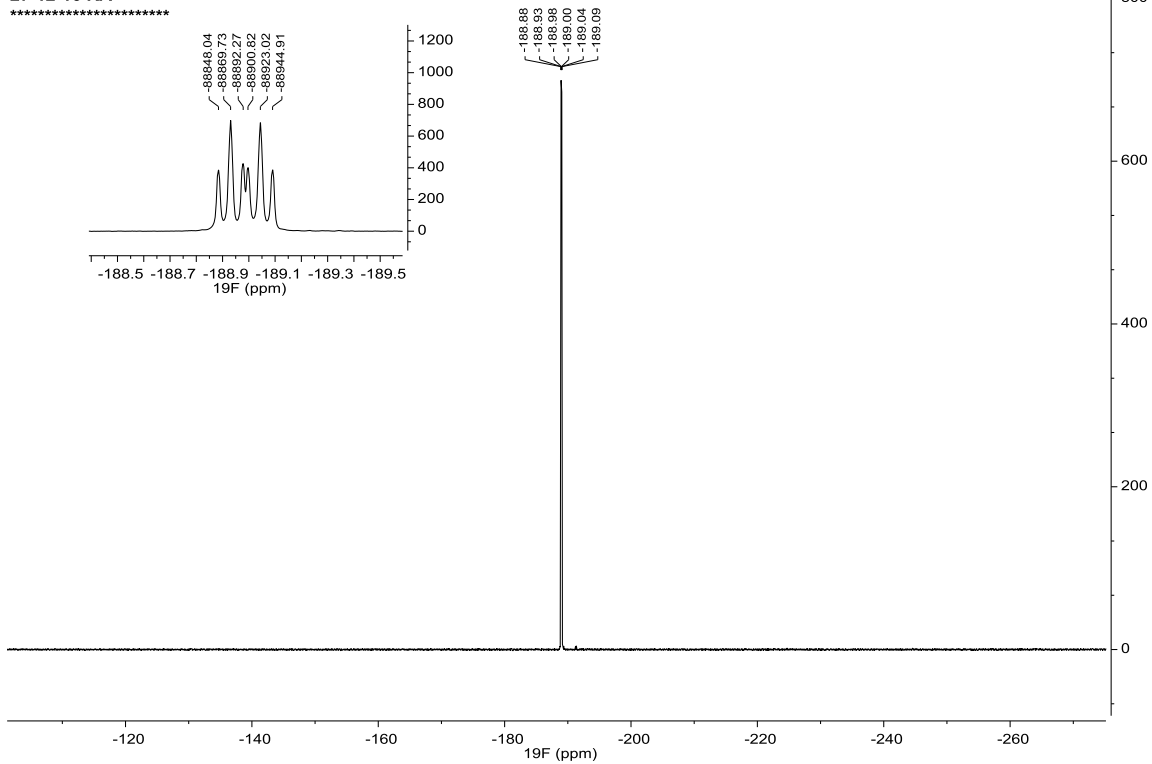

KONC JKO-217  
 1H NMR in DMSO-d6  
 23-12-16 RA

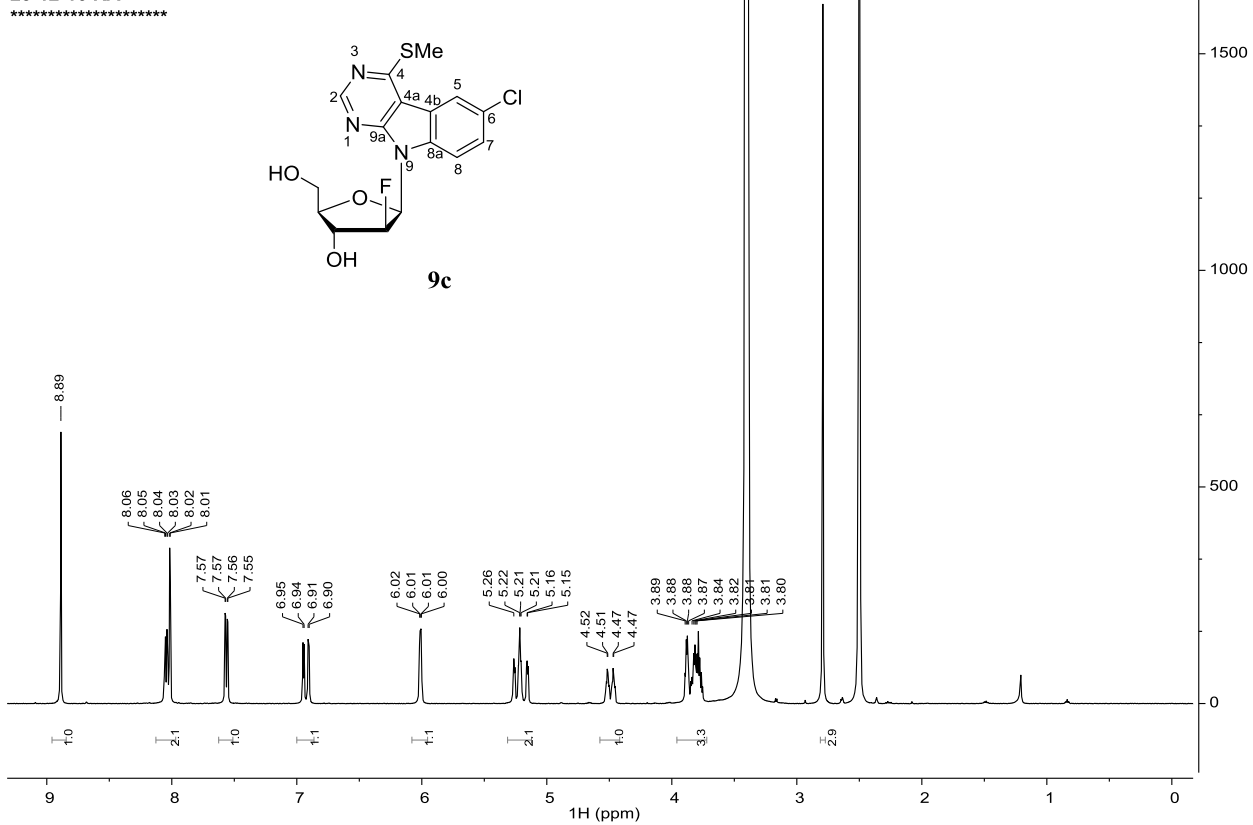

KONC JKO-217  
APT in DMSO-d6  
23-12-16 RA

\*\*\*\*\*

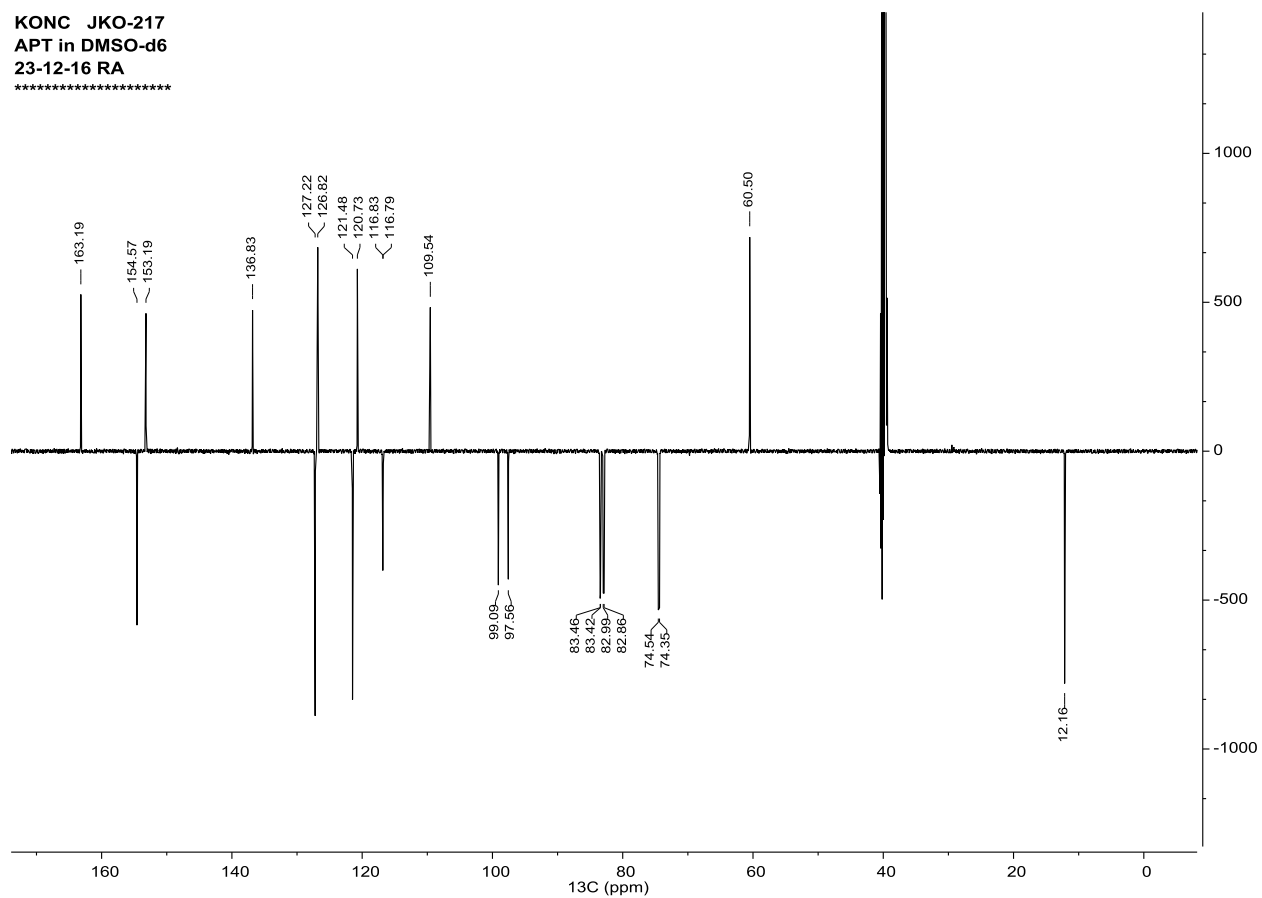

KONC JKO-217  
19F NMR in DMSO-d6  
27-12-16 RA

\*\*\*\*\*

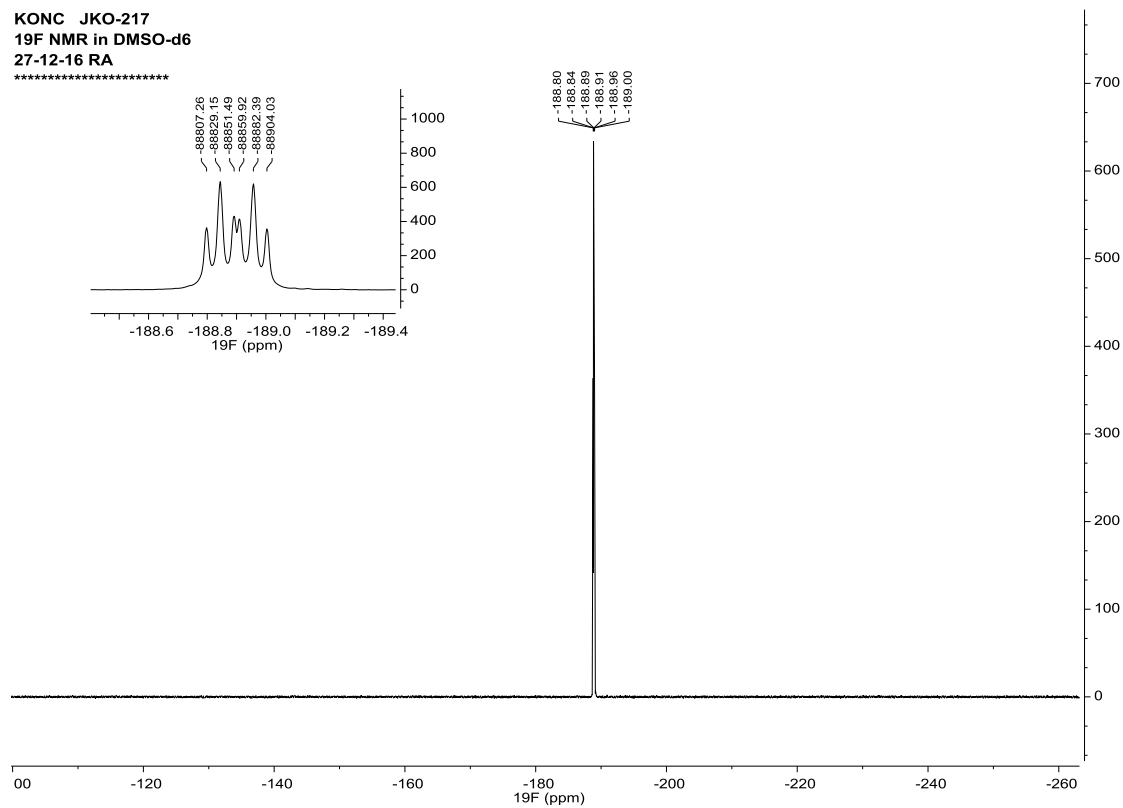

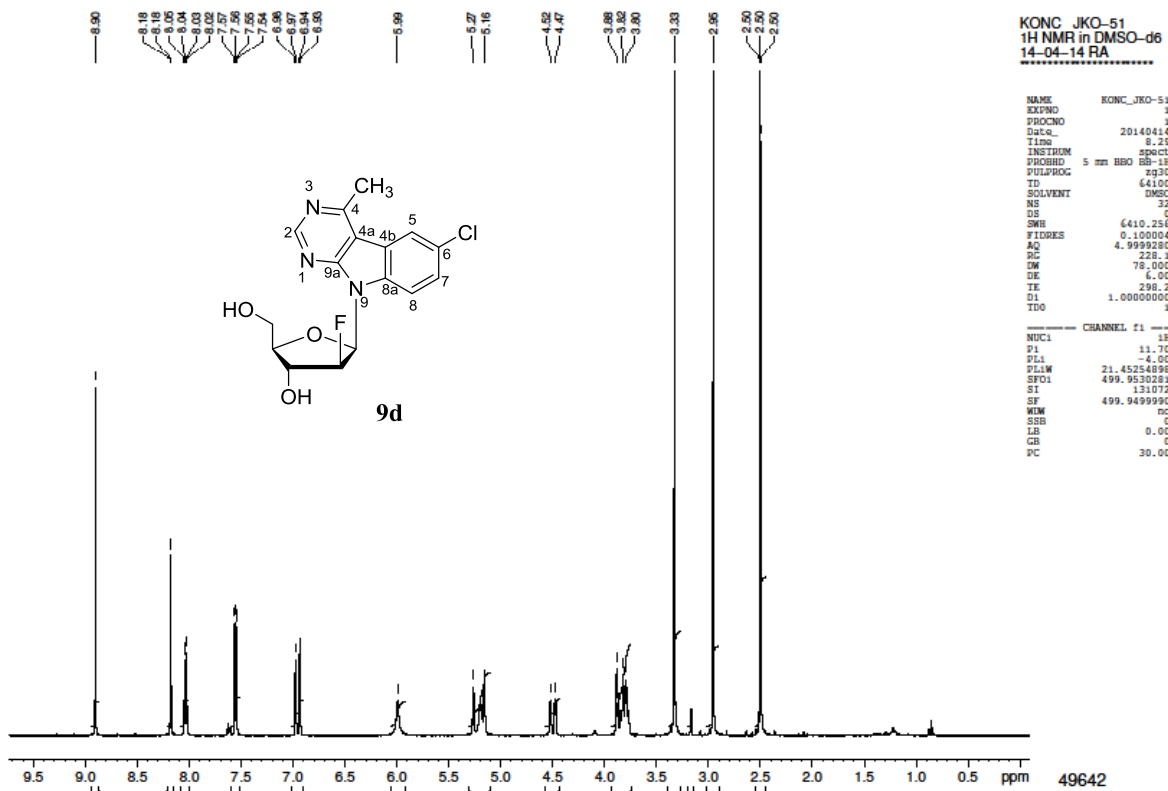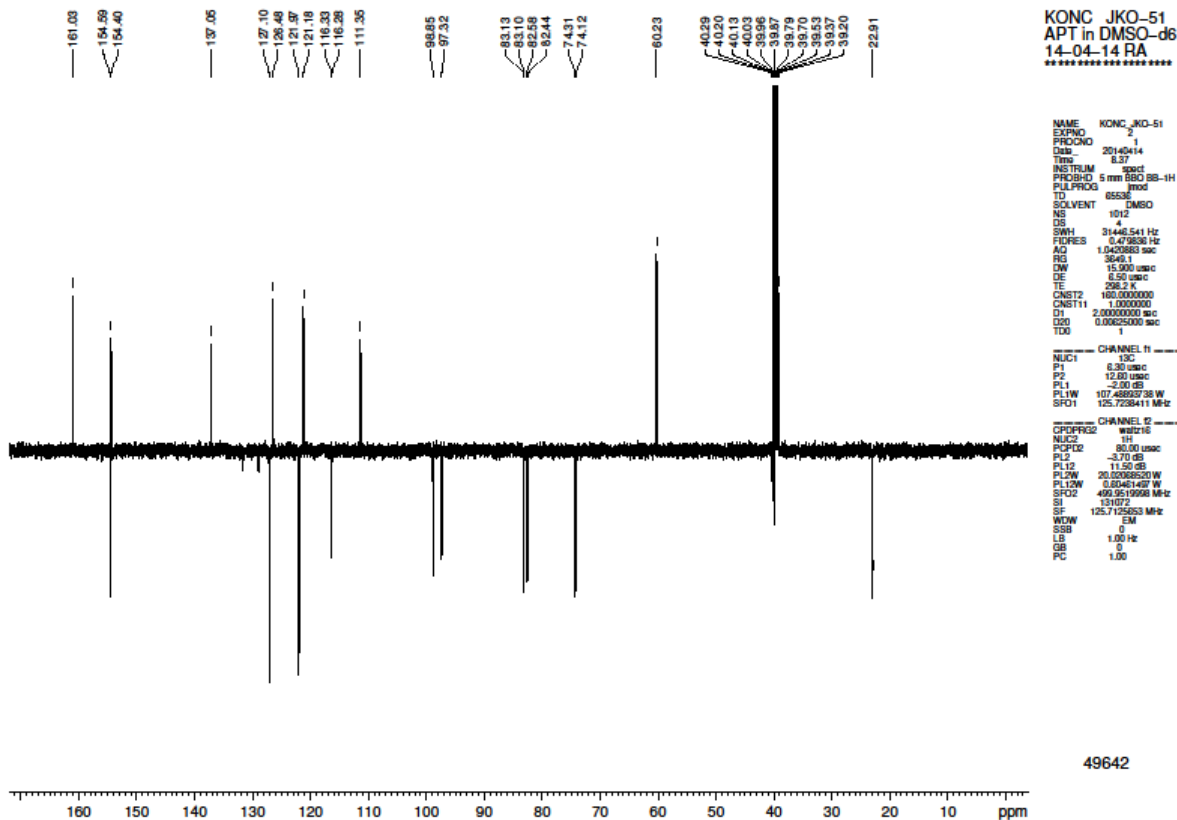

KONC\_JKO51  
 19F(1H) NMR in DMSO-c  
 17-04-14 RA

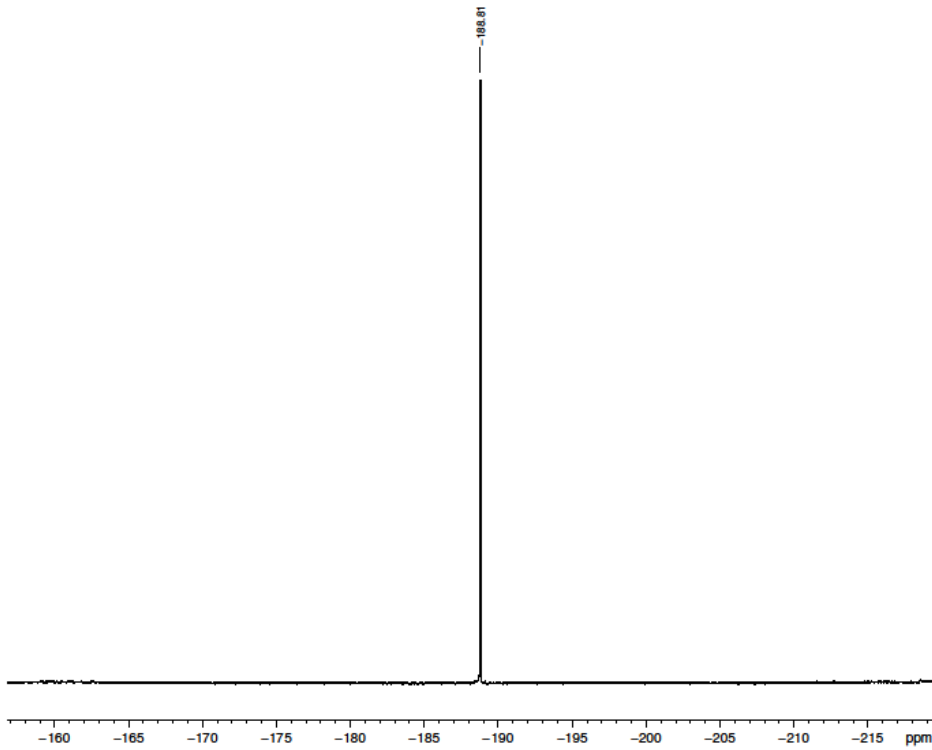

```

NAME KONC_JKO51
EXPNO 1
PROCNO 1
Date_ 20140417
Time 9.40
INSTRUM spect
PROBHD 5 mm TBO BB-1H
PULPROG zgpg30
TD 65536
SOLVENT DMSO
NS 2
DS 0
SWH 130088.801 Hz
FIDRES 0.250077 Hz
AQ 1.9999940 sec
RG 409
RW 3.000 usec
DE 20.00 usec
TE 298.2
D1 1.00000000 sec
D11 0.00000000 sec
TD0 1

----- CHANNEL f1 -----
NUC1 19F
P1 12.50 usec
PL1 0.00 dB
PL12 42.7000000 W
SFO1 470.2629741 MHz

----- CHANNEL f2 -----
CHPROG waltz16
NUC2 1H
PCPD 80.00 usec
PL2 -2.50 dB
PL12 15.50 dB
PL1W 35.7348781 W
PL2W 0.52800000 W
SFO2 499.8426867 MHz
SI 28244
SF 470.3179323 MHz
EM
WDW EM
SSB 0
LB 3.00 Hz
GB 0
PC 1.00
  
```

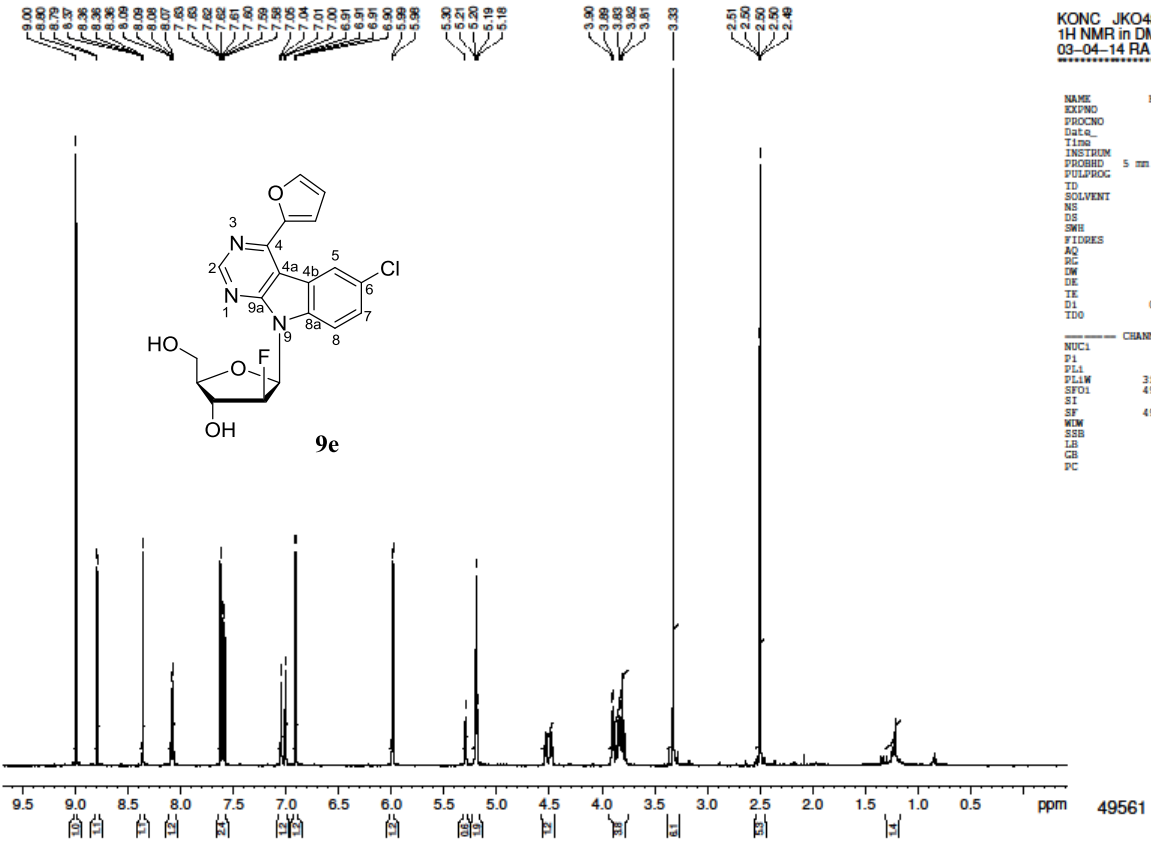



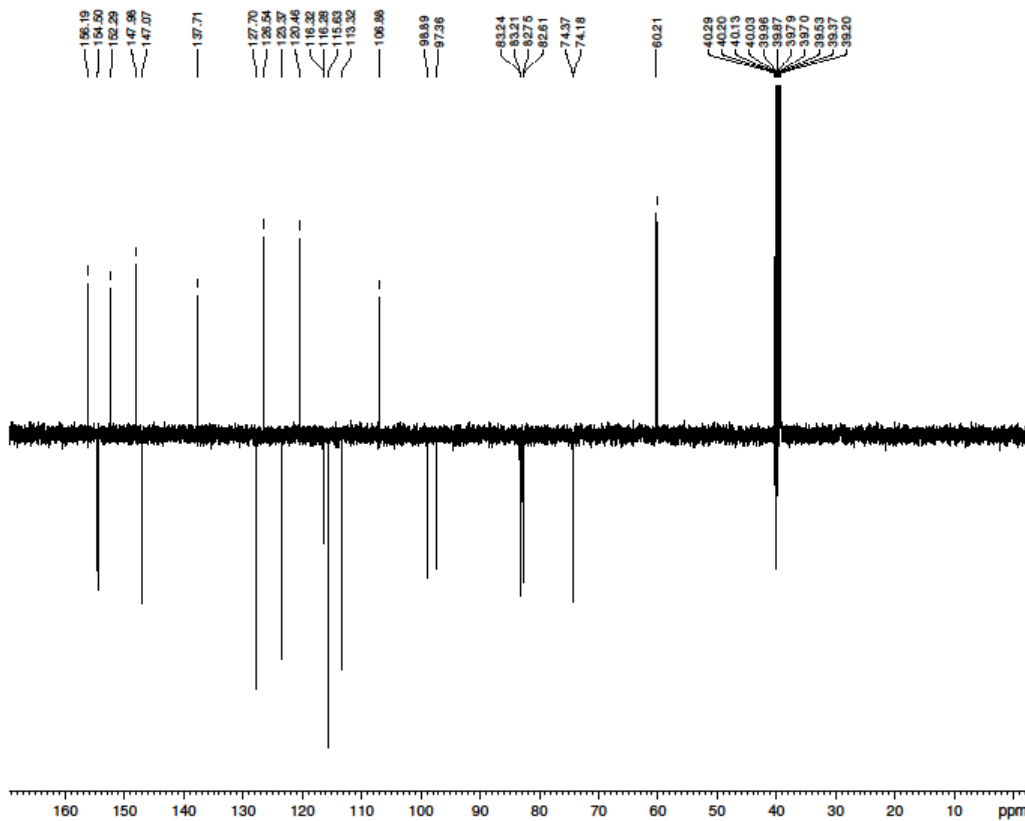

KONC JKO48  
APT in DMSO-d6  
03-04-14 RA

```

NAME      KONC_JKO48
EXPNO     2
PROCNO    1
Date_     20140403
Time      15.54
INSTRUM   spect
PROBHD    5 mm TBO BB-1H
PULPROG   prog
TD         65536
SOLVENT   DMSO
NS         1244
DS         4
SWH        29761.904 Hz
FIDRES     0.454191 Hz
AQ         1.1010548 sec
RG         2050
CW         15.850 usec
DE         20.00 usec
TE         298.2
CNST12    160.000000
CNST11    1.000000
D1         2.0000000 sec
D2         0.00825000 sec
TDO        1
  
```

```

----- CHANNEL f1 -----
NUC1      13C
P1         8.00 usec
P2         16.00 usec
PL1        -3.30 dB
PL12       104.3086526 W
SFO1       125.6274365 MHz

----- CHANNEL f2 -----
CPDPRG2   waltz16
NUC2       1H
PCPD2     80.00 usec
PL2        -2.00 dB
PL12       14.71 dB
PL12W     31.54857358 W
PL12W     0.67924436 W
SFO2       400.5110994 MHz
SI         131072
SF         125.6284543 MHz
WDW        EM
SSB        0
LB         1.00 Hz
GB         0
PC         1.00
  
```

49561

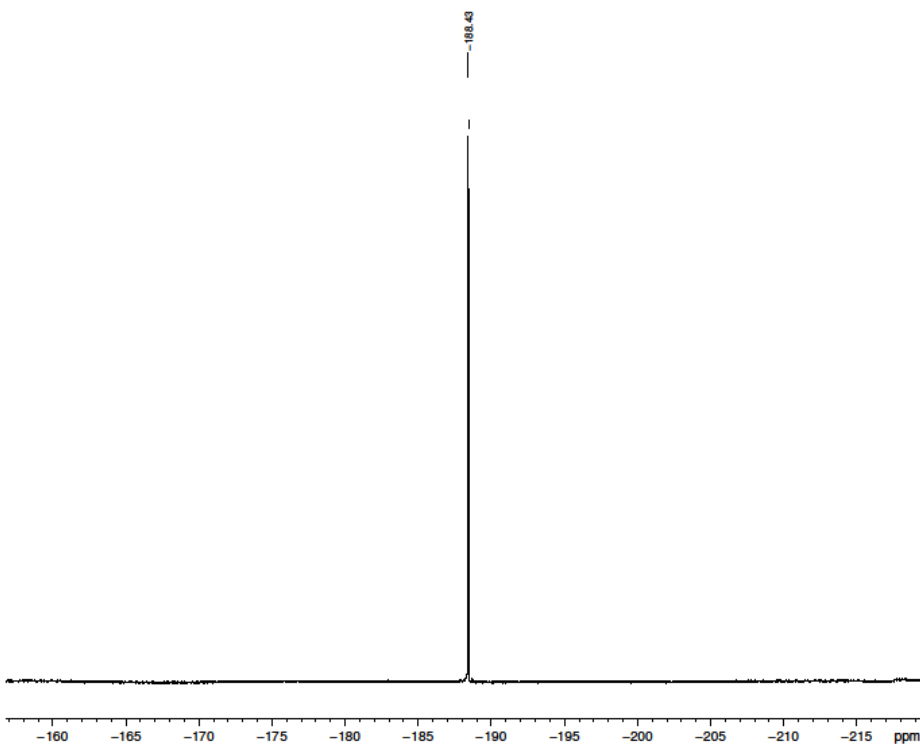

KONC JKO48  
19F(1H) NMR in DMSO-c  
17-04-14 RA

```

NAME      KONC_JKO48
EXPNO     94
PROCNO    1
Date_     20140417
Time      9.15
INSTRUM   spect
PROBHD    5 mm BBO BB-1H
PULPROG   zpg
TD         555544
SOLVENT   DMSO
NS         32
DS         0
SWH        138888.891 Hz
FIDRES     0.250007 Hz
AQ         1.9959941 sec
RG         405
CW         3.000 usec
DE         20.00 usec
TE         298.2
D1         1.0000000 sec
D2         0.0300000 sec
TDO        1
  
```

```

----- CHANNEL f1 -----
NUC1      19F
P1         12.50 usec
P2         0.00 usec
PL1        0.00 dB
PL12       42.7020833 W
SFO1       470.2632741 MHz

----- CHANNEL f2 -----
CPDPRG2   waltz16
NUC2       1H
PCPD2     80.00 usec
PL2        -2.50 dB
PL12       15.26 dB
PL12W     35.7348761 W
PL12W     0.55835588 W
SFO2       400.5110994 MHz
SI         262144
SF         470.3175533 MHz
WDW        EM
SSB        0
LB         3.00 Hz
GB         0
PC         1.00
  
```

49561

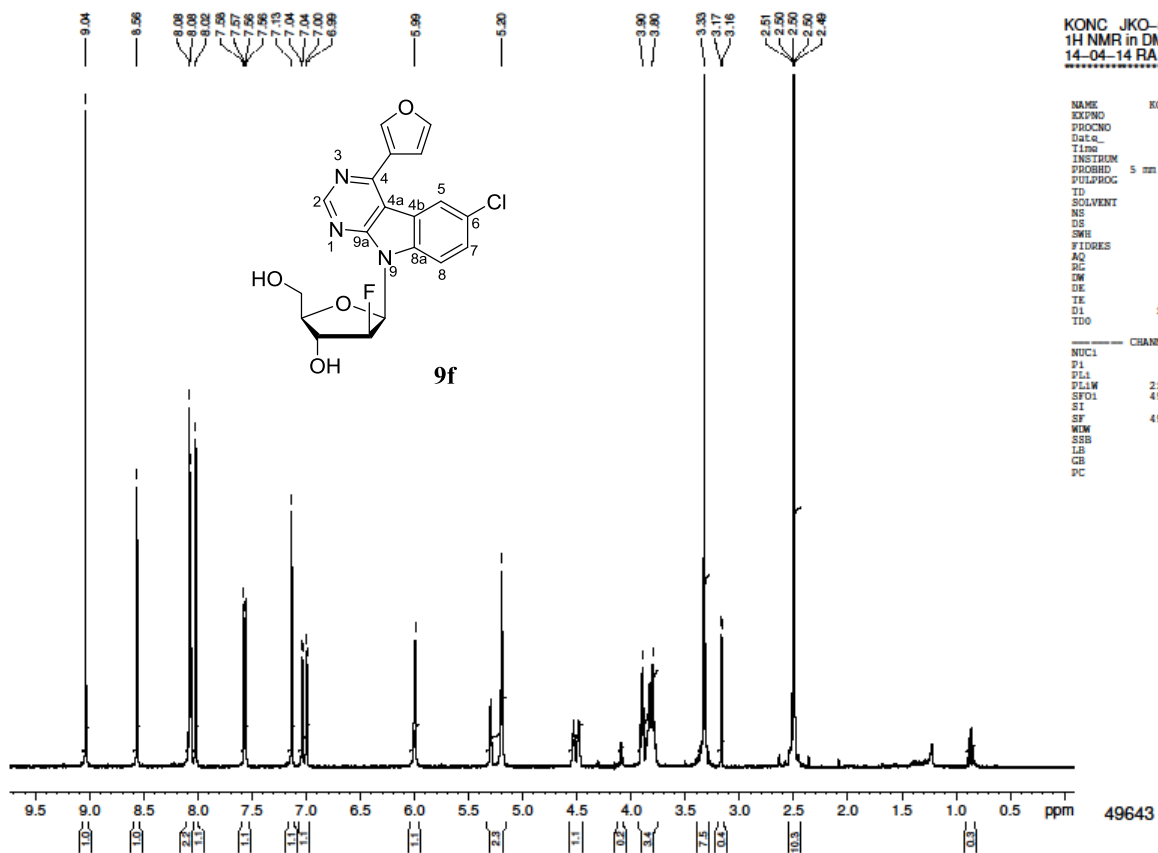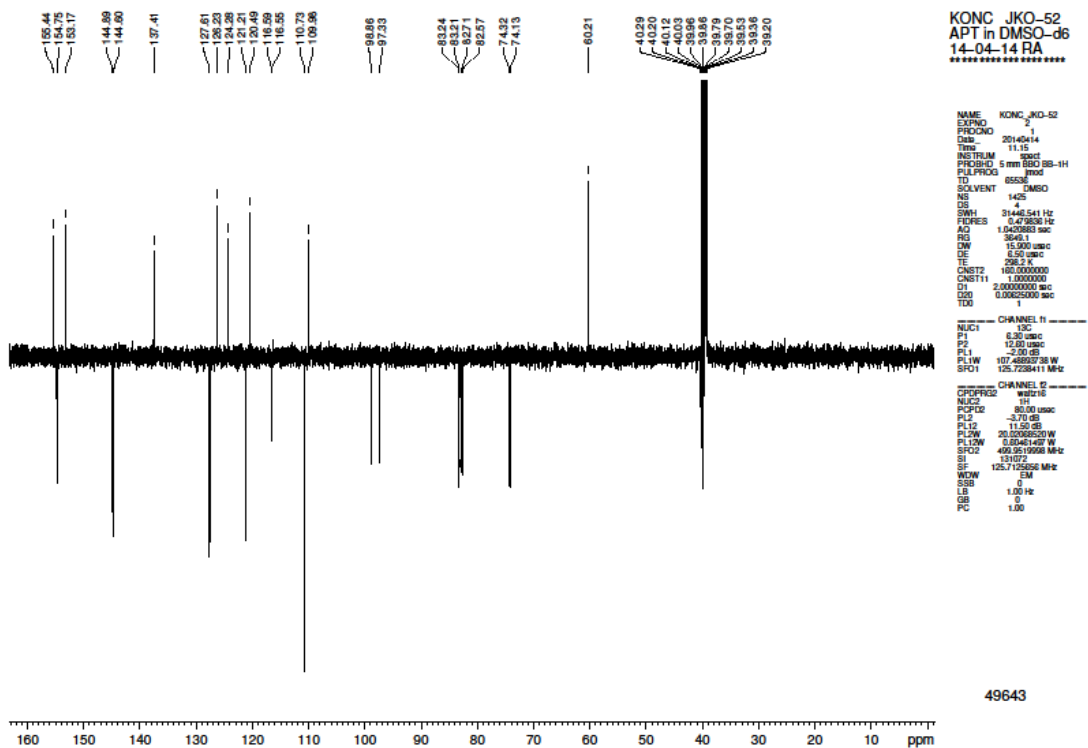

KONC JKO52  
 19F{1H} NMR in DMSO-d  
 17-04-14 RA  
 \*\*\*\*\*

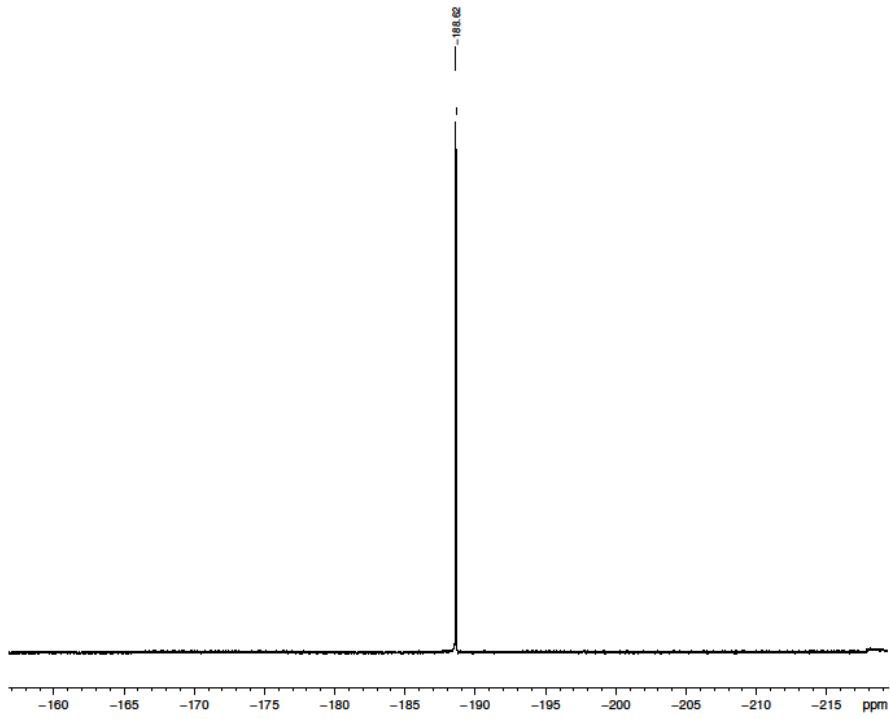

```

NAME KONC_JKO52
EXPNO 14
PROCNO 1
DIR_ 20140417
TIME 10.32
INSTRUM spect
PROBHD 5 mm TBO BB-1H
PULPROG zgpg
TD 65536
SOLVENT DMSO
NS 32
DS 0
SWH 13886.891 Hz
F2 0.250000 Hz
AQ 1.900000 sec
RG 400
DM 3.000 umc
DE 20.0 umc
TE 300.2 K
D1 1.0000000 sec
D11 0.0300000 sec
TD 1

----- CHANNEL f1 -----
NUC1 19F
P1 12.50 umc
PL1 0.00 dB
PLTW 42.7000000 W
SFO1 470.25321 MHz

----- CHANNEL g1 -----
CPDPRG2 waltz16
NUC2 131
PCPD2 80.00 umc
PC 2.50 dB
PL2 15.50 dB
PCW 25.7500000 W
PLTW 6.5500000 W
SFO2 492.6400000 MHz
SI 202144
SF 470.25321 MHz
WDW EM
SSB 0
LB 3.00 Hz
GB 0
PC 1.00
  
```

KONC JKO-233  
 1H NMR in DMSO-d6  
 23-12-16 RA  
 \*\*\*\*\*

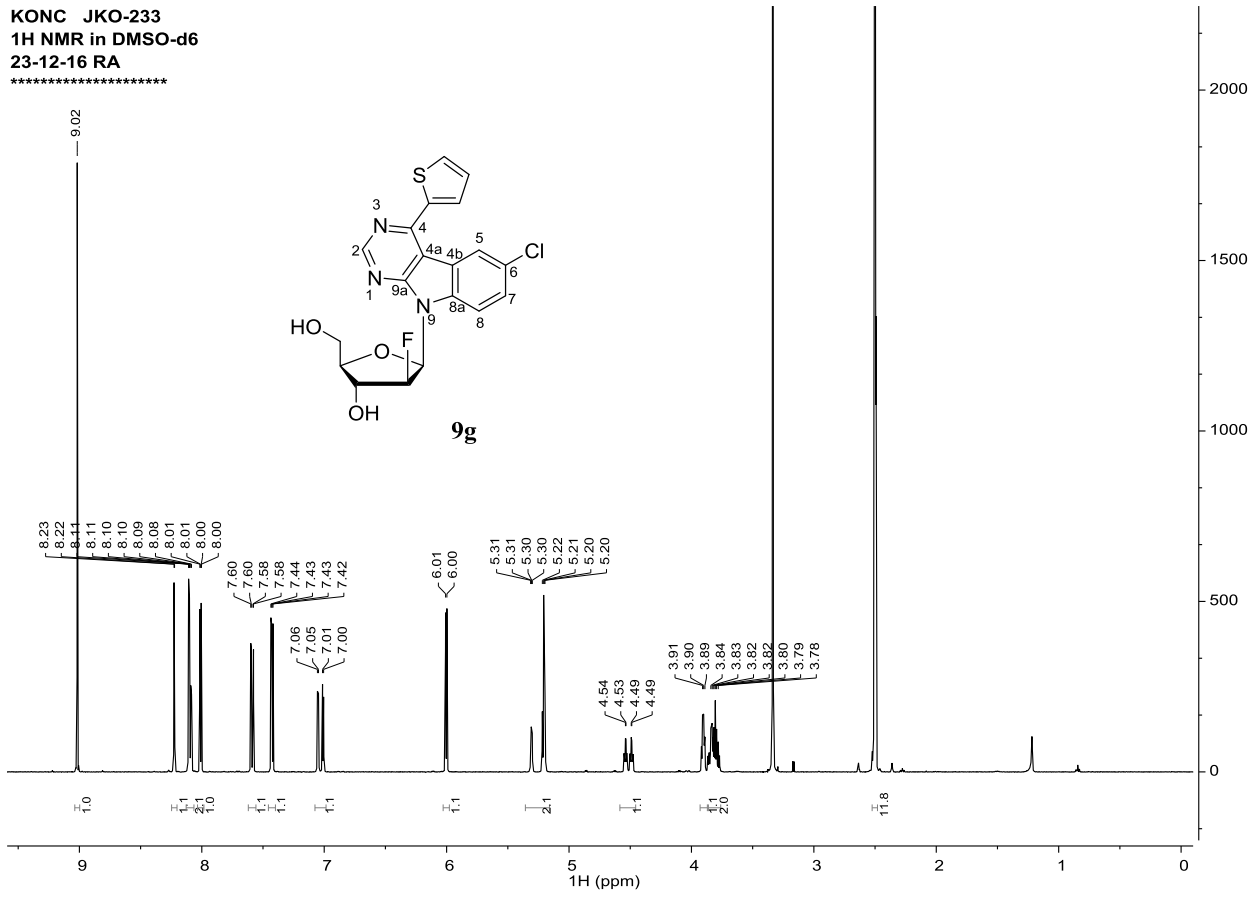

KONC JKO-233  
APT in DMSO-d6  
23-12-16 RA

\*\*\*\*\*

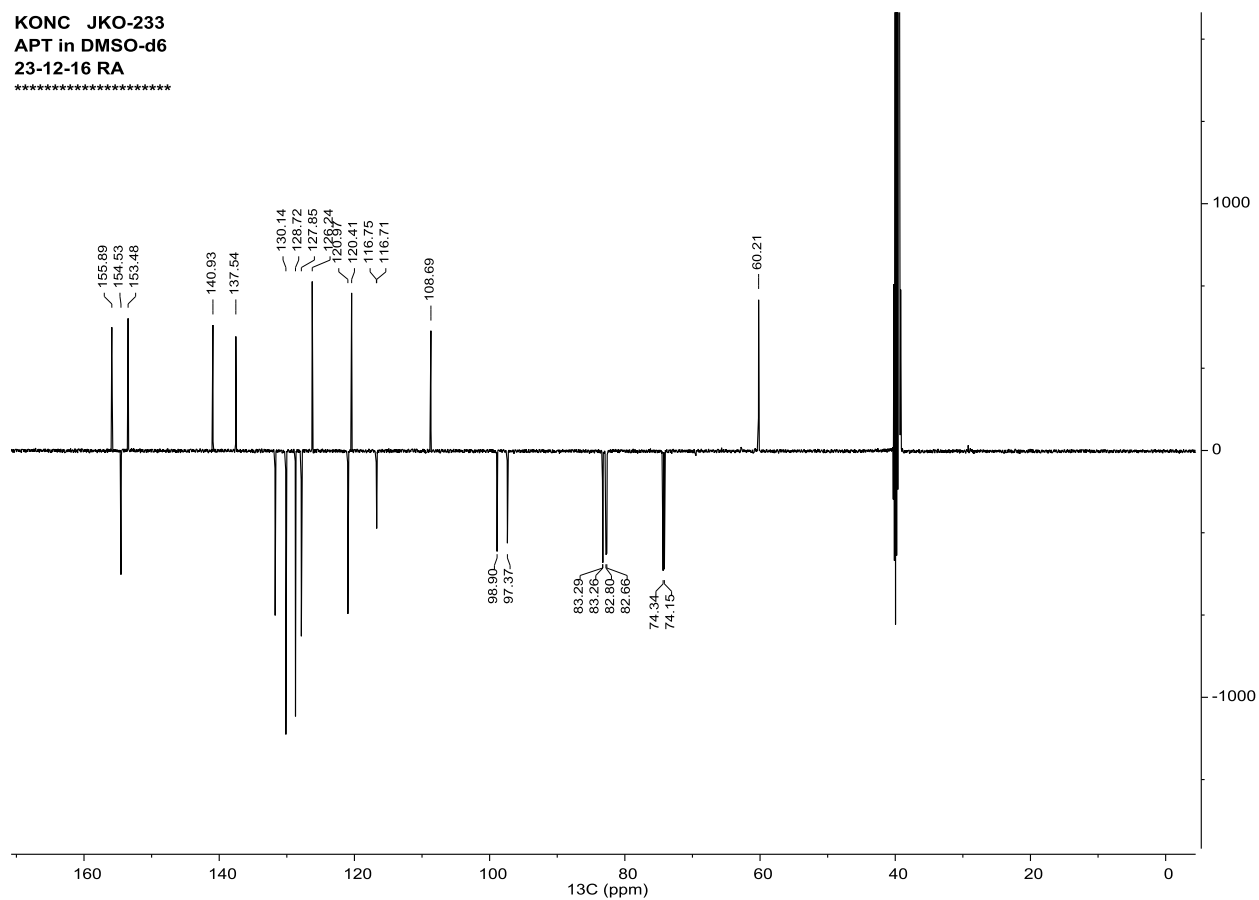

KONC JKO-233  
19F NMR in DMSO-d6  
27-12-16 RA

\*\*\*\*\*

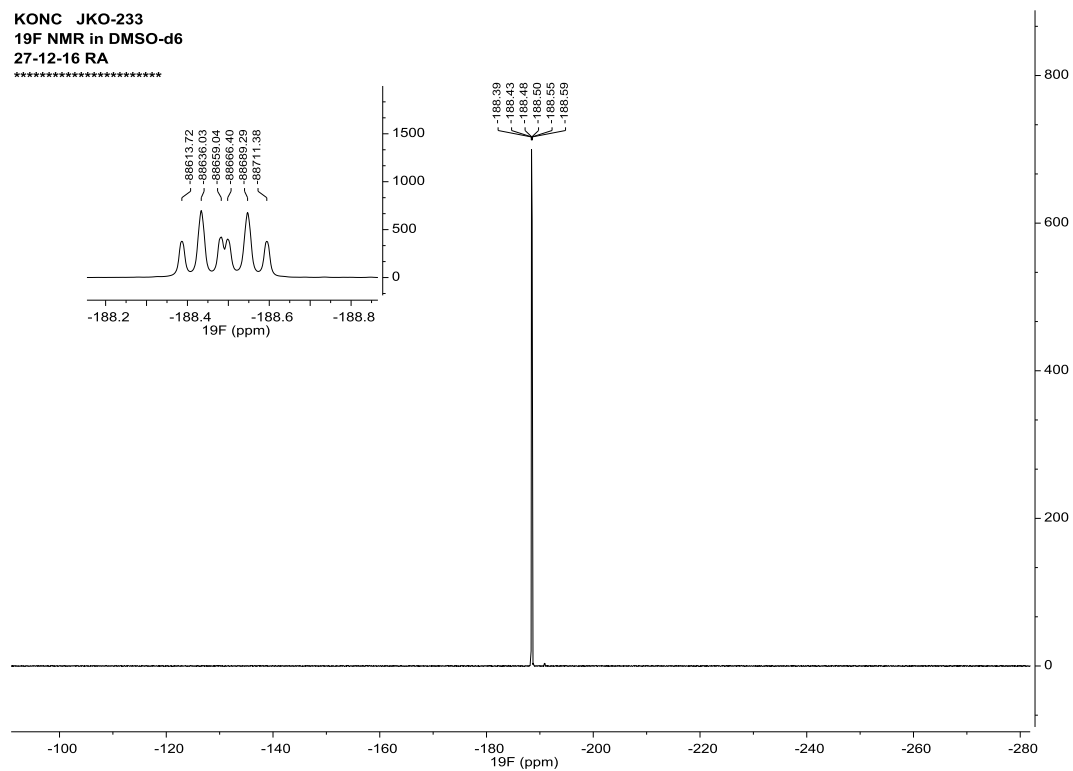

KONC JKO-226  
 1H NMR in DMSO-d6  
 23-12-16 RA  
 \*\*\*\*\*

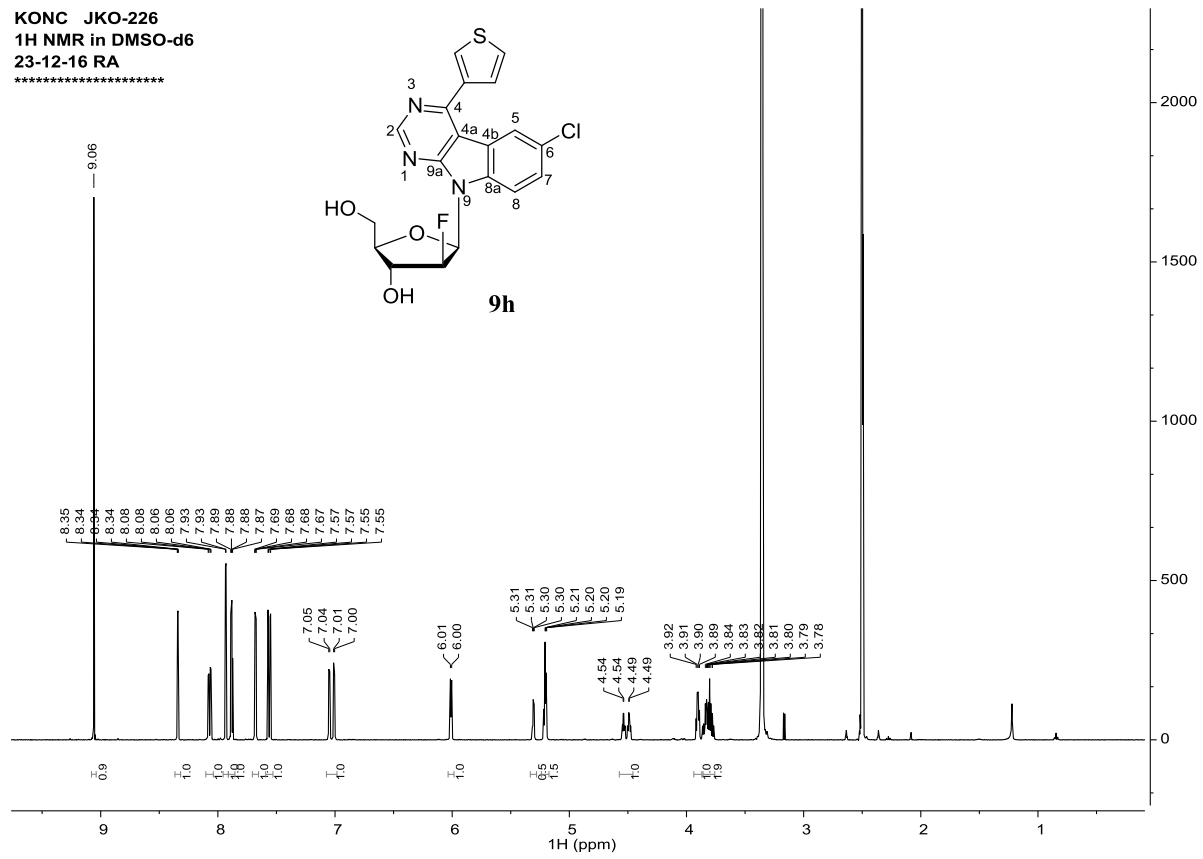

KONC JKO-226  
 APT in DMSO-d6  
 23-12-16 RA  
 \*\*\*\*\*

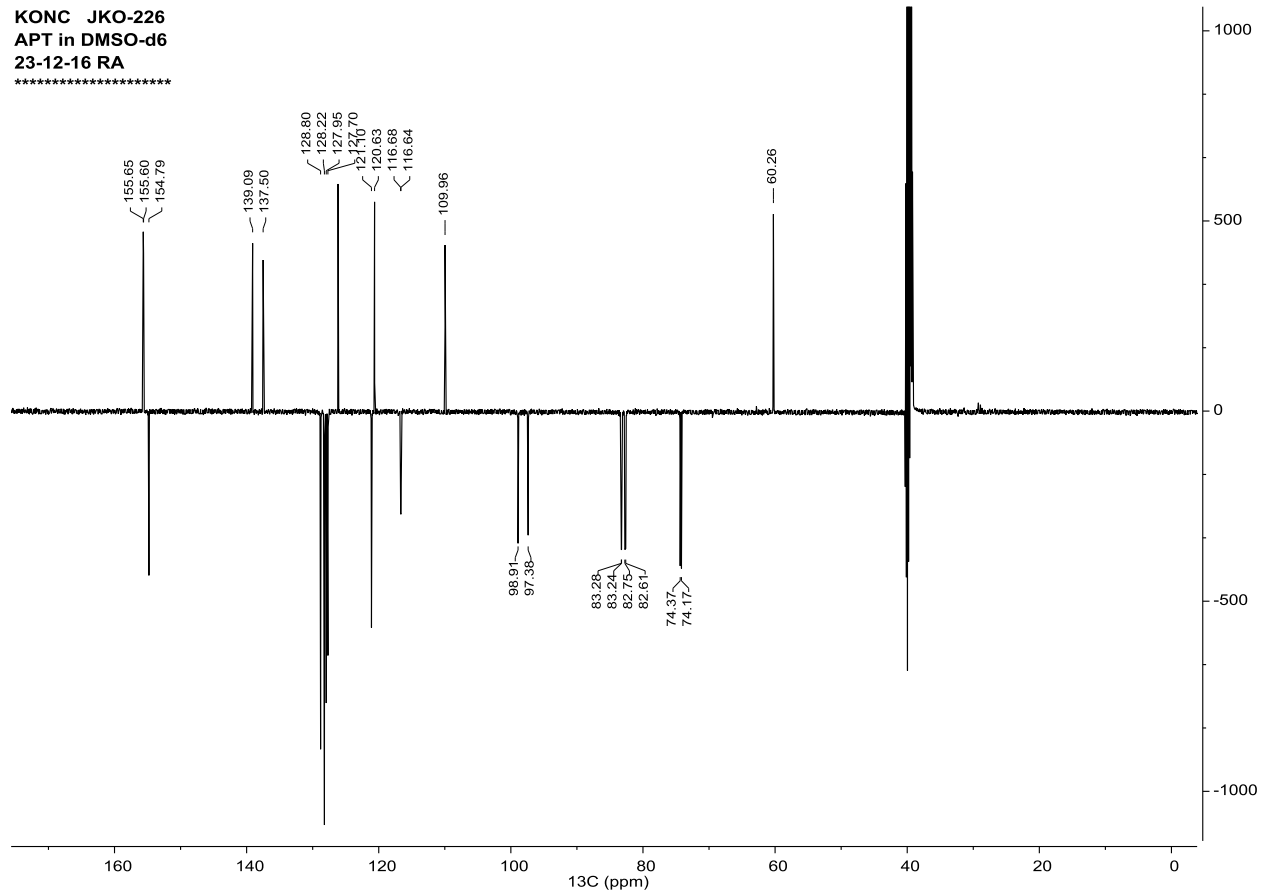

KONC JKO-226  
 19F NMR in DMSO-d6  
 27-12-16 RA

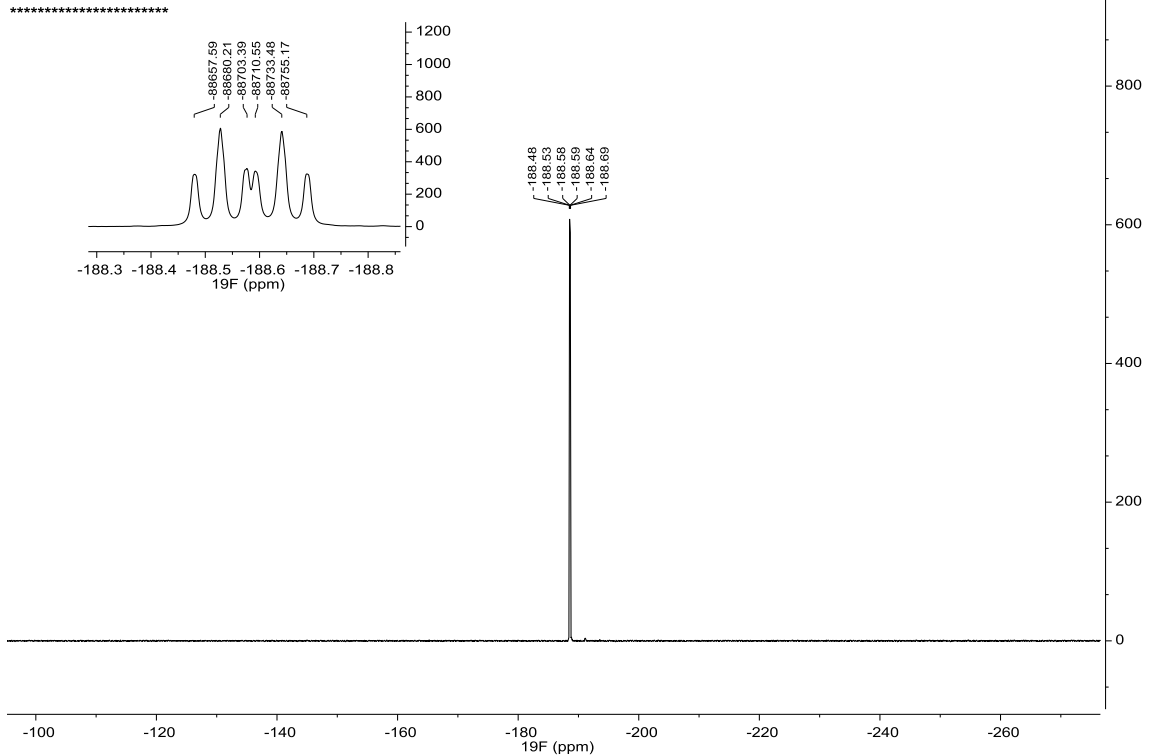

KONC JKO-225  
 1H NMR in DMSO-d6  
 23-12-16 RA

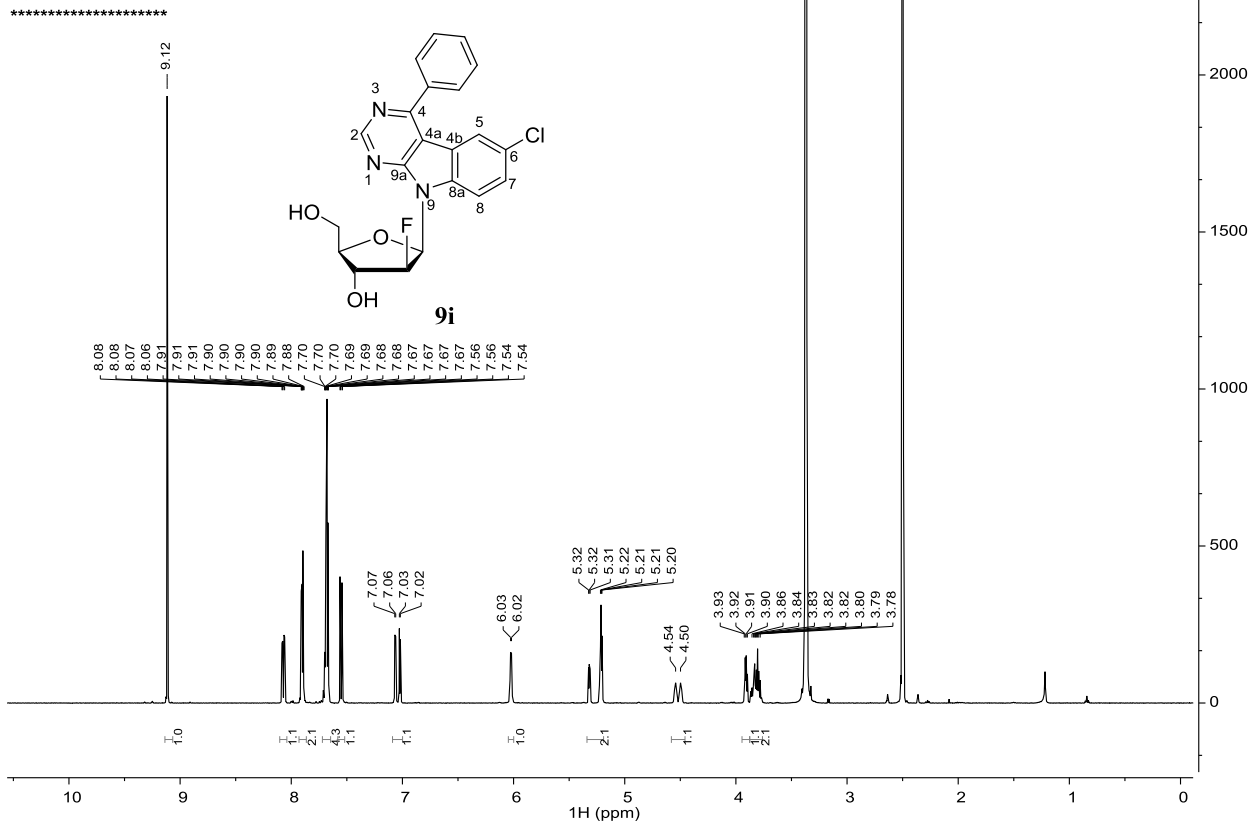

KONC JKO-225  
APT in DMSO-d6  
23-12-16 RA  
\*\*\*\*\*

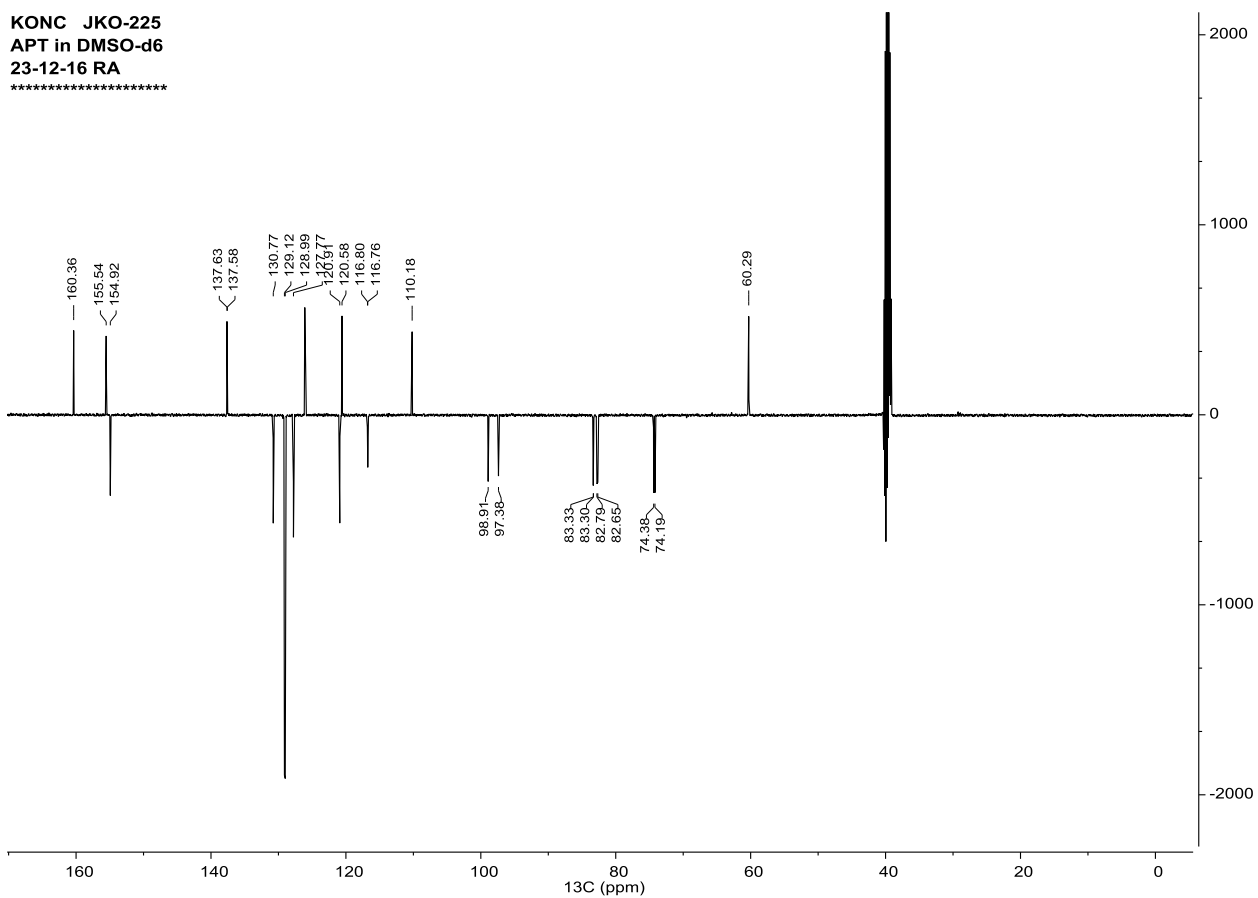

KONC JKO-225  
19F NMR in DMSO-d6  
27-12-16 RA  
\*\*\*\*\*

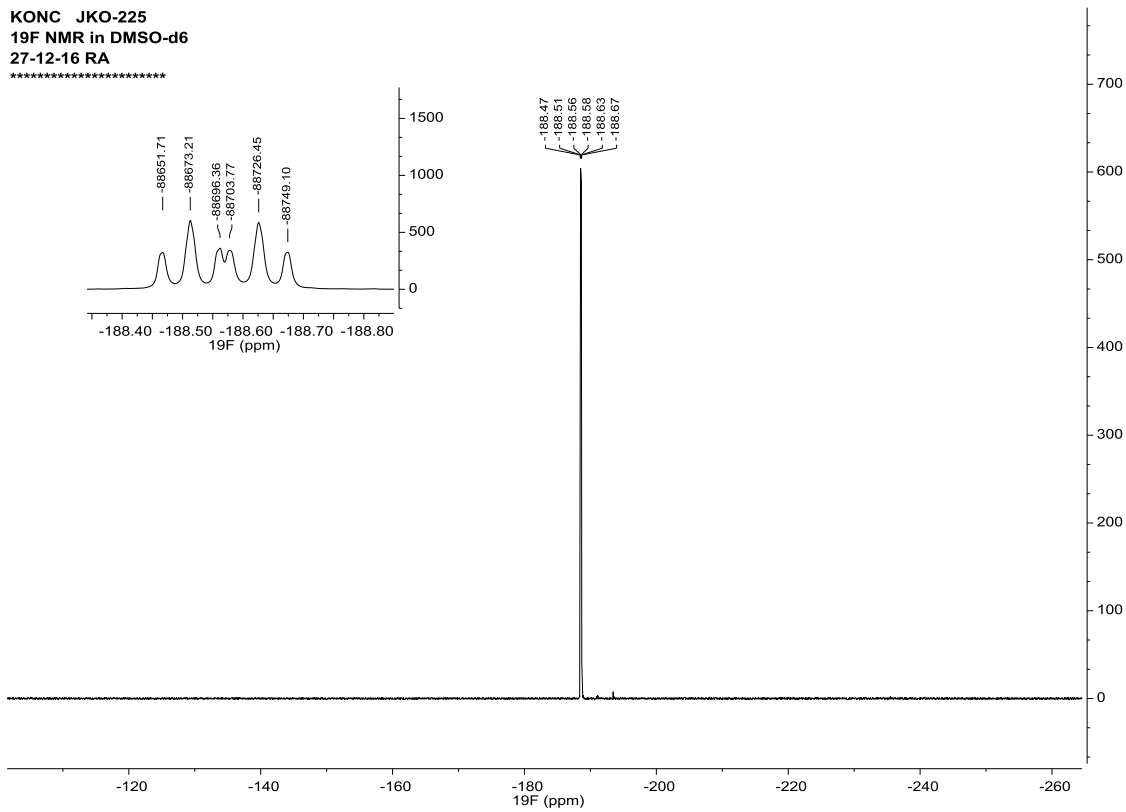

KONC JKO-157  
 1H NMR in DMSO-d6  
 02-05-16 RA  
 \*\*\*\*\*

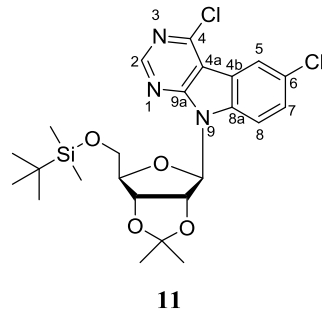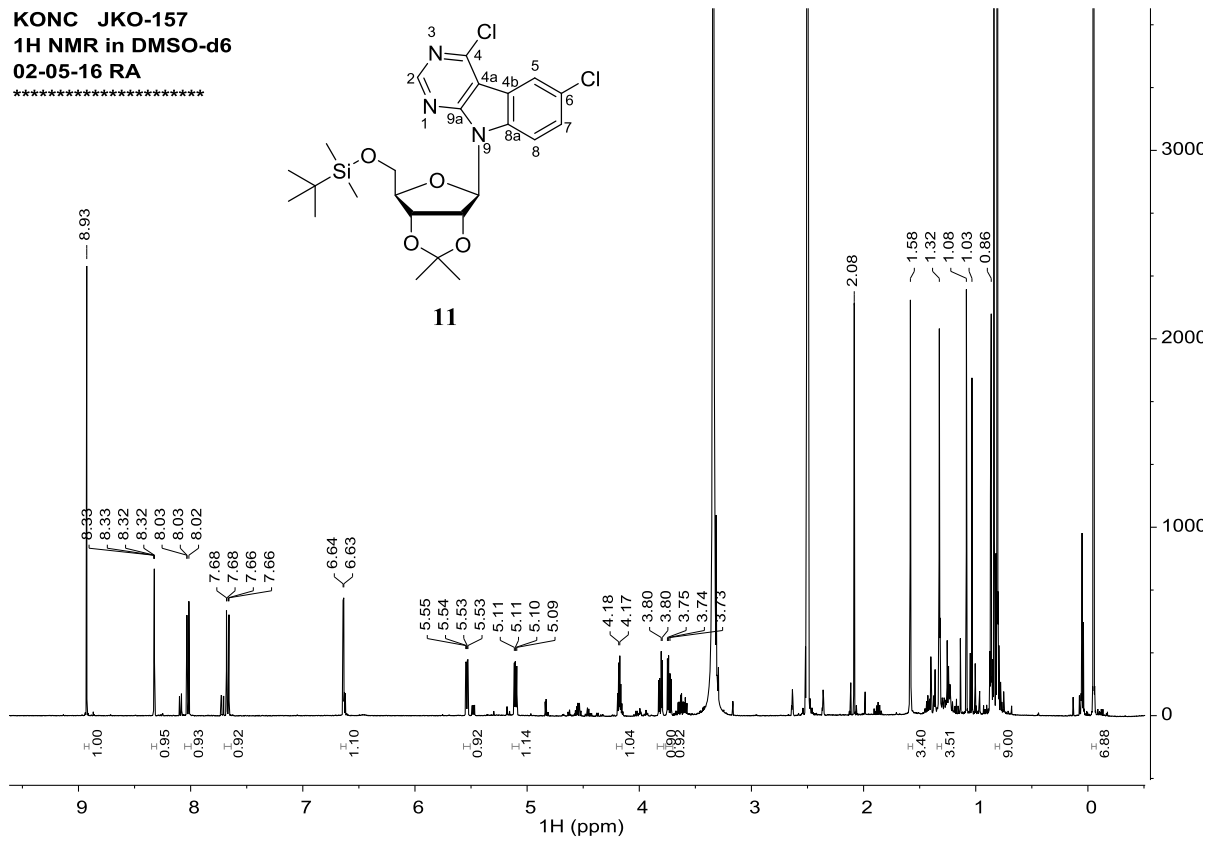

KONC JKO-157  
 APT in DMSO-d6  
 02-05-16 RA  
 \*\*\*\*\*

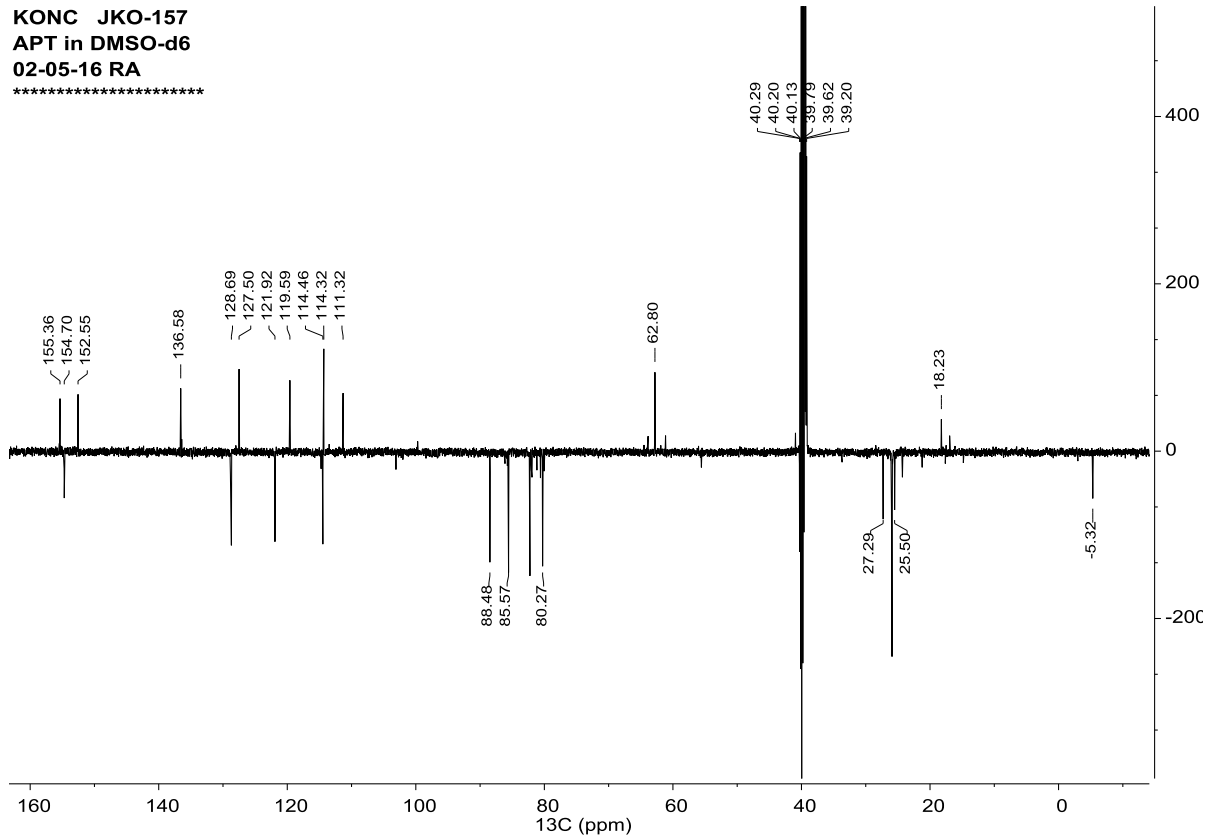



KONC JKO-109  
1H NMR in DMSO-d6  
26-01-16 RA  
\*\*\*\*\*

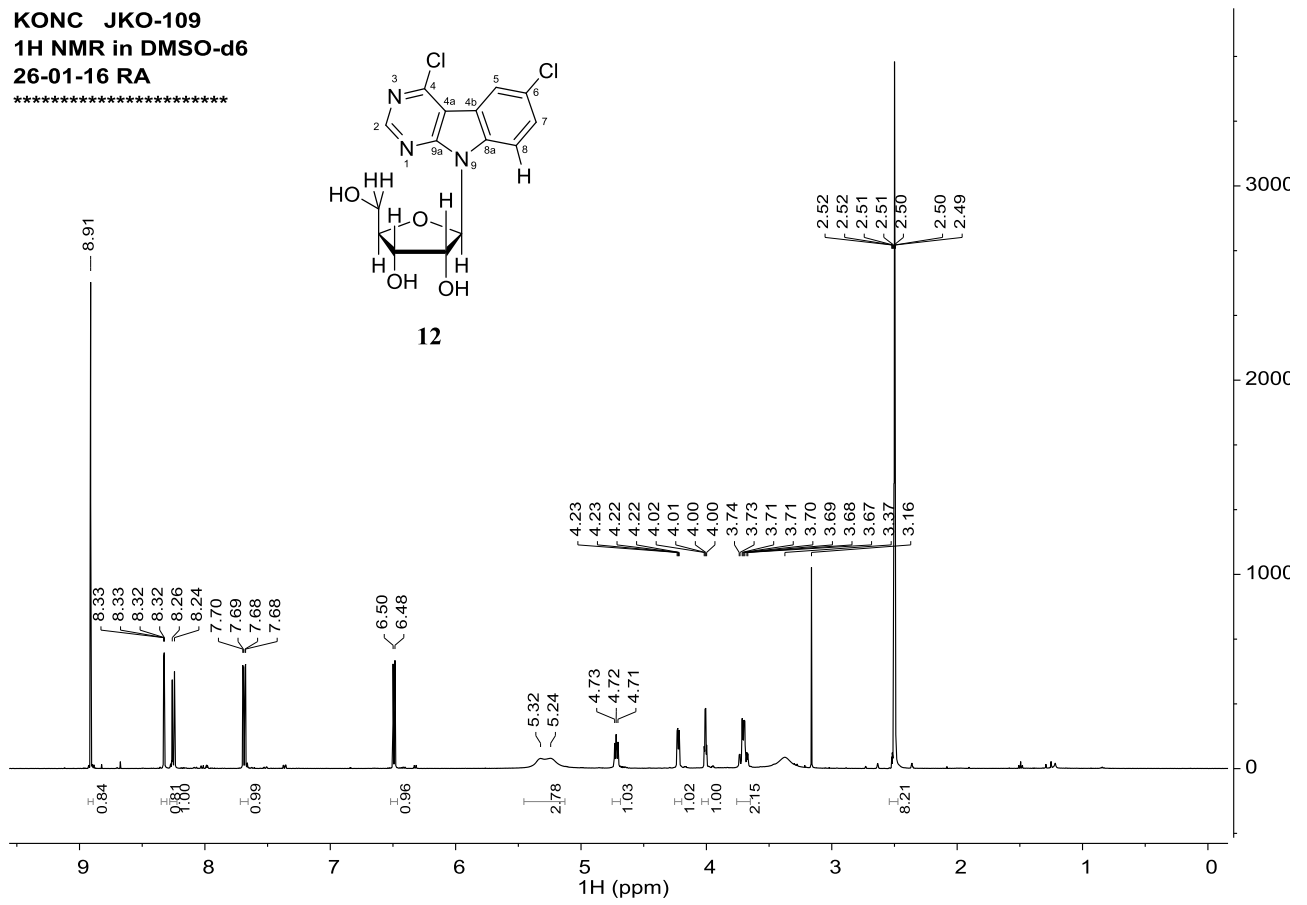

KONC JKO-109  
APT in DMSO-d6  
26-01-16 RA  
\*\*\*\*\*

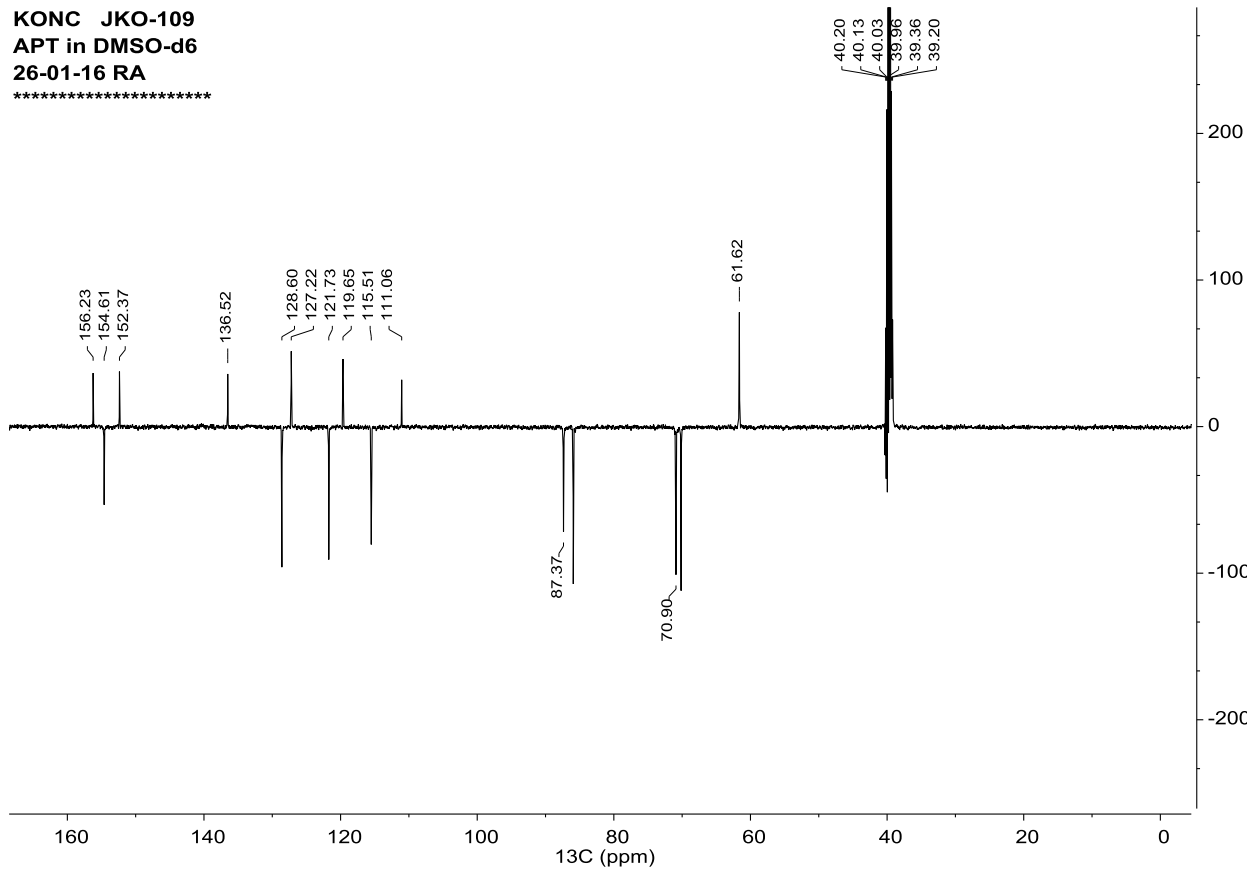

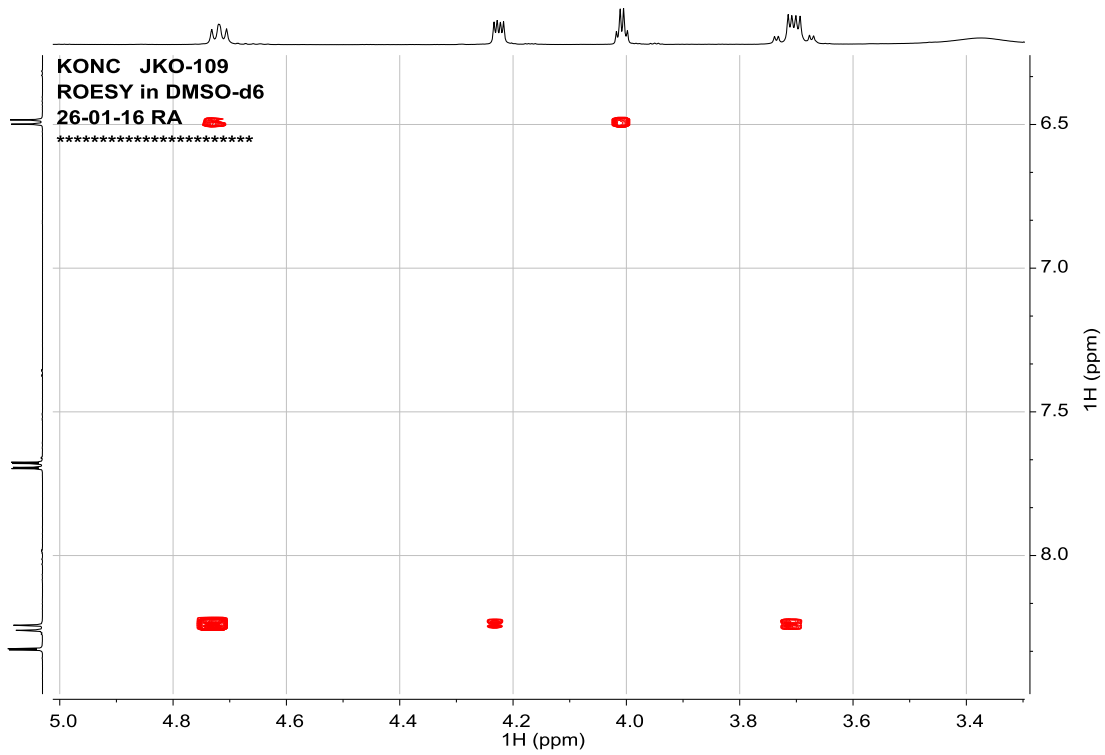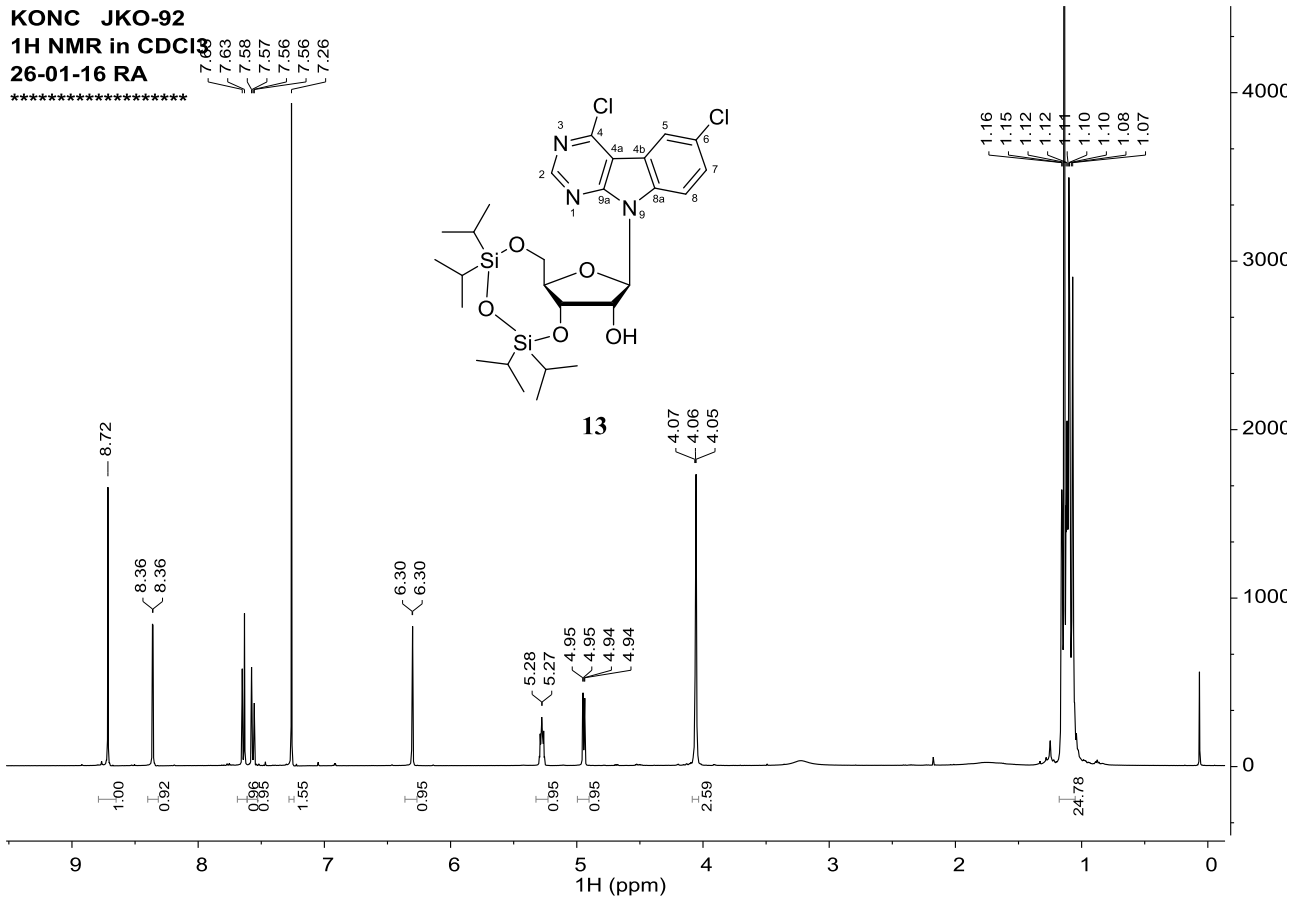

KONC JKO-92  
 APT in CDCl<sub>3</sub>  
 26-01-16 RA  
 \*\*\*\*\*

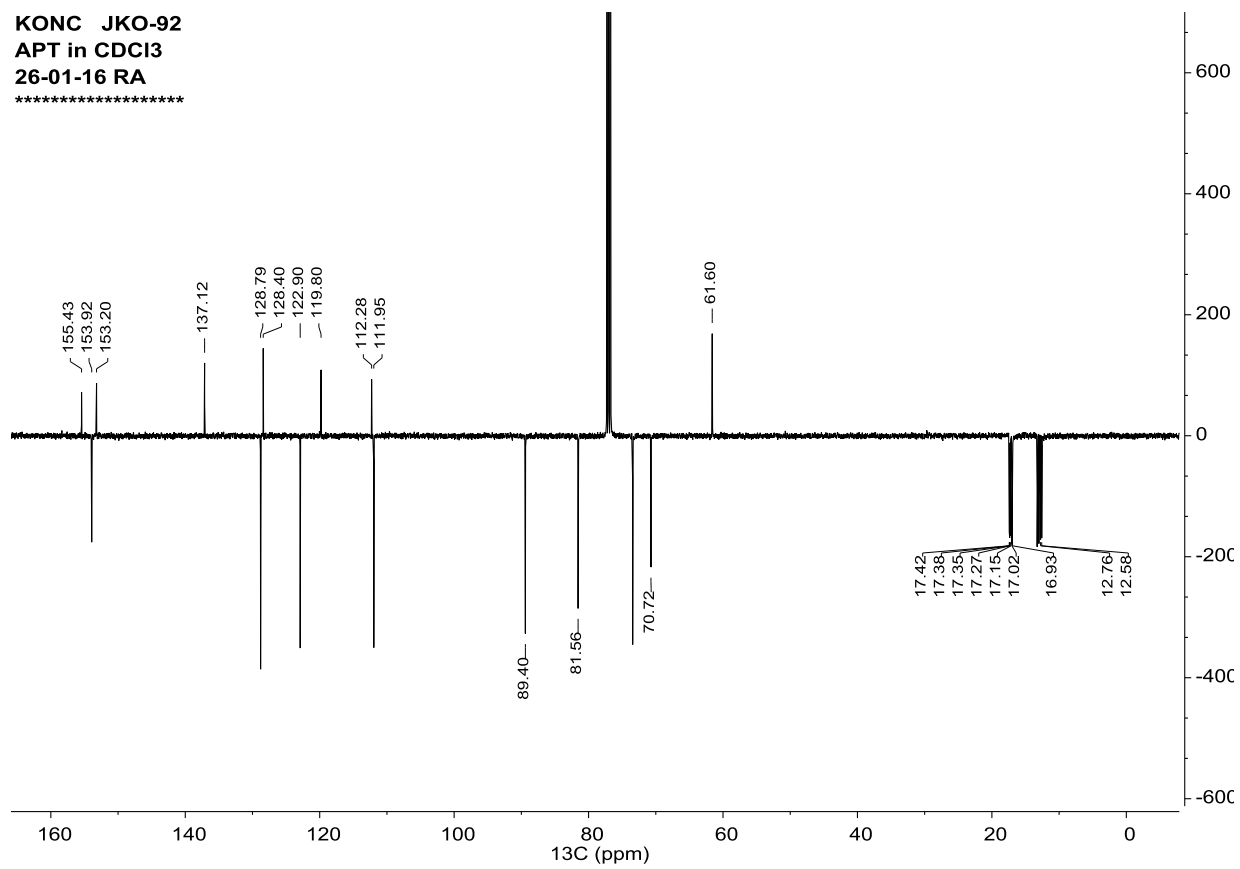

KONC JKO-93  
 1H NMR in CDCl<sub>3</sub>  
 26-01-16 RA  
 \*\*\*\*\*

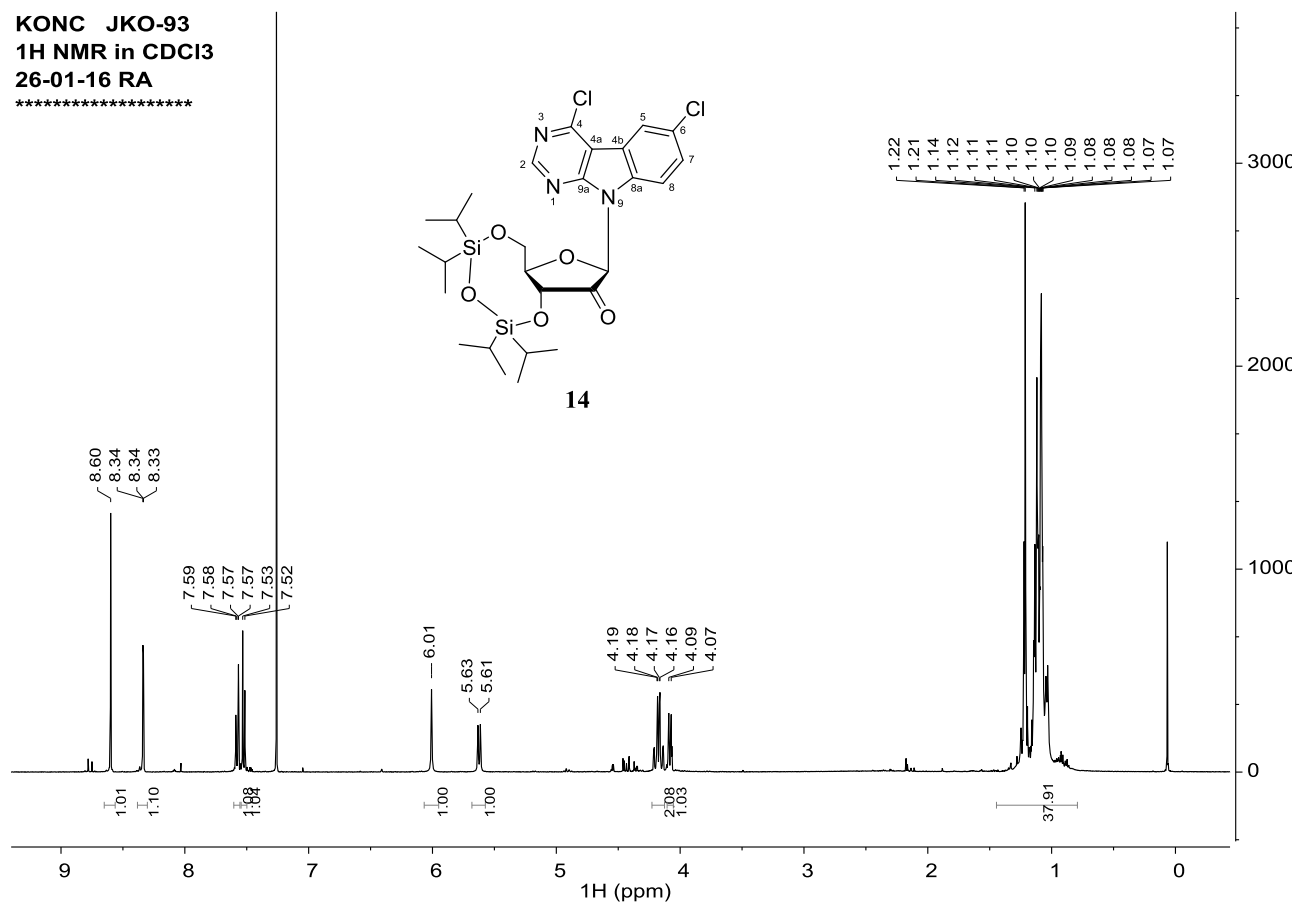

KONC JKO-93  
 APT in CDCl3  
 26-01-16 RA  
 \*\*\*\*\*

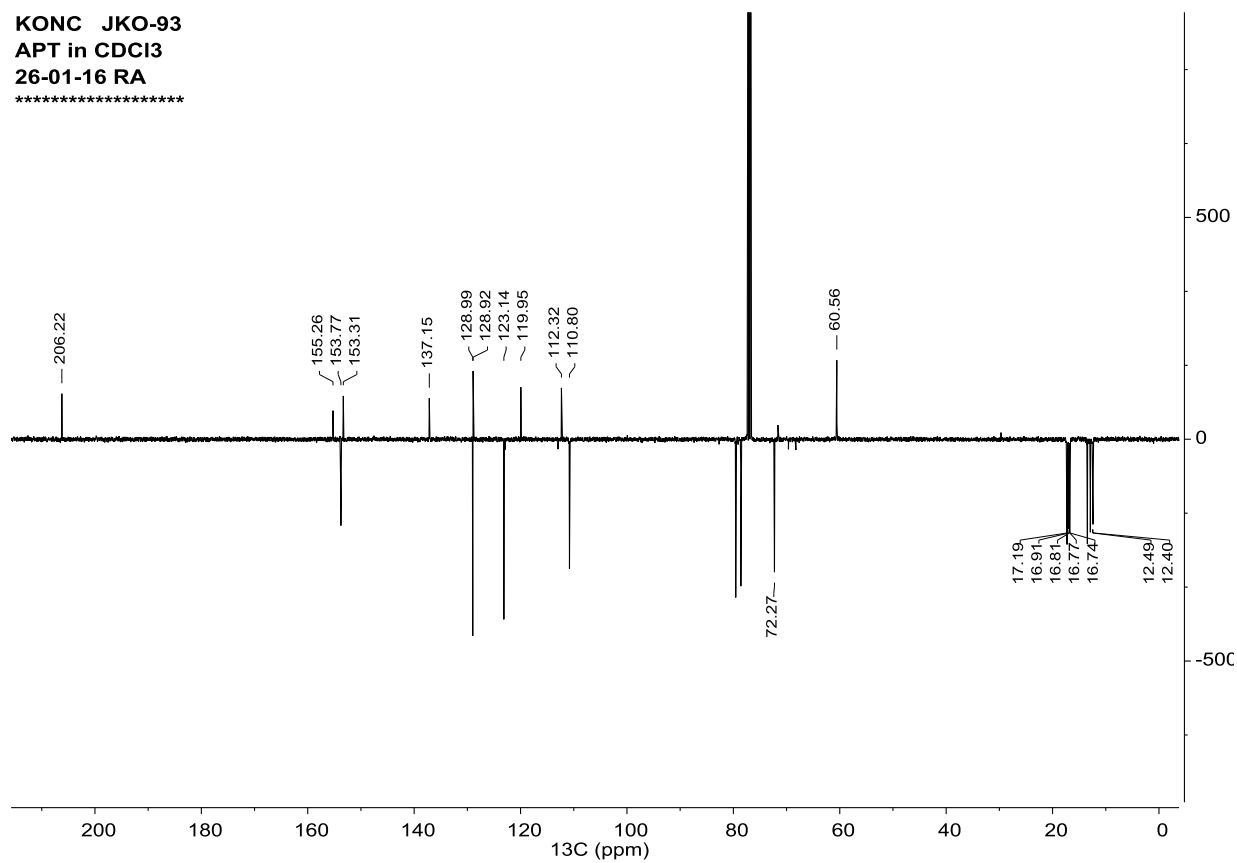

KONC JKO-94  
 1H NMR in CDCl3  
 26-01-16 RA  
 \*\*\*\*\*

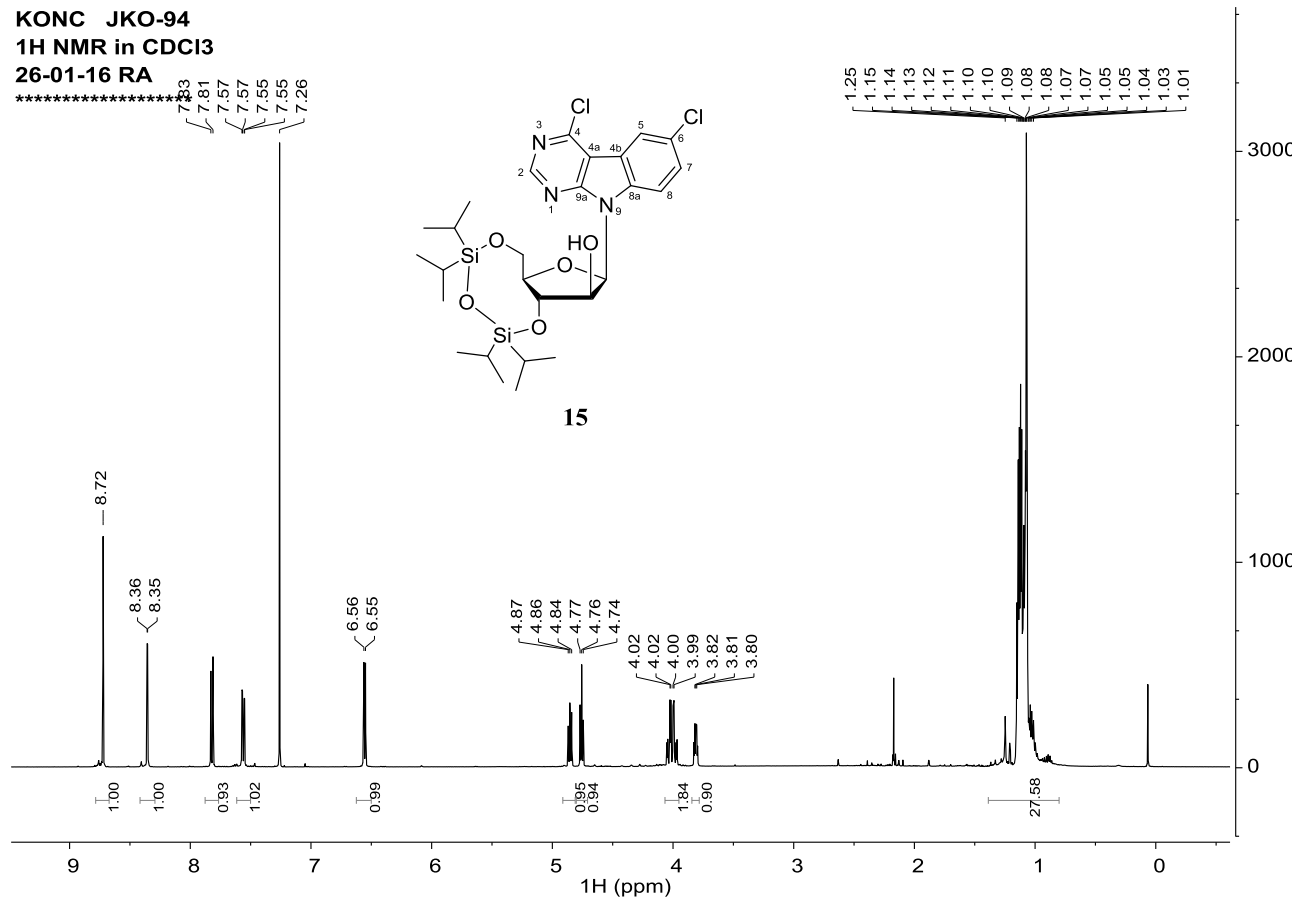

KONC JKO-94  
 APT in CDCl3  
 26-01-16 RA  
 \*\*\*\*\*

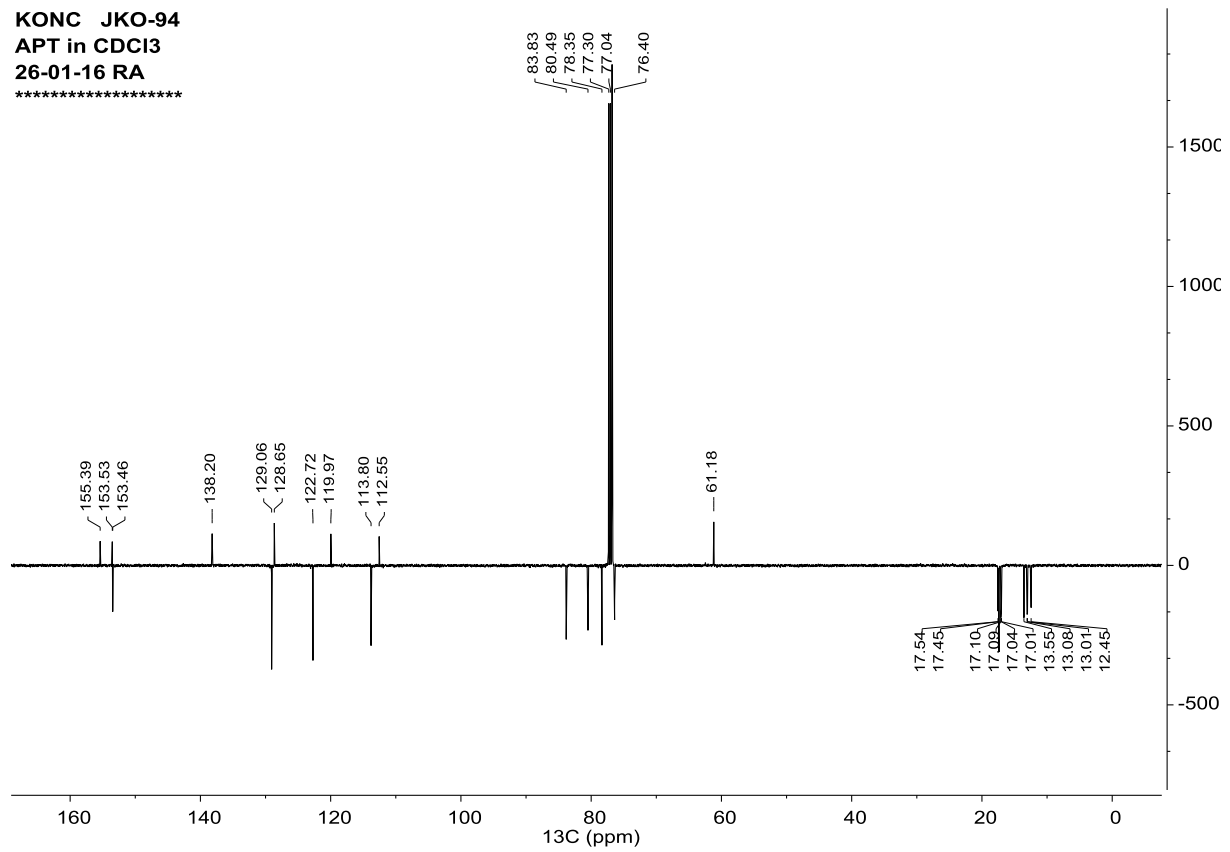

KONC JKO-95  
 1H NMR in DMSO-d6  
 26-01-16 RA  
 \*\*\*\*\*

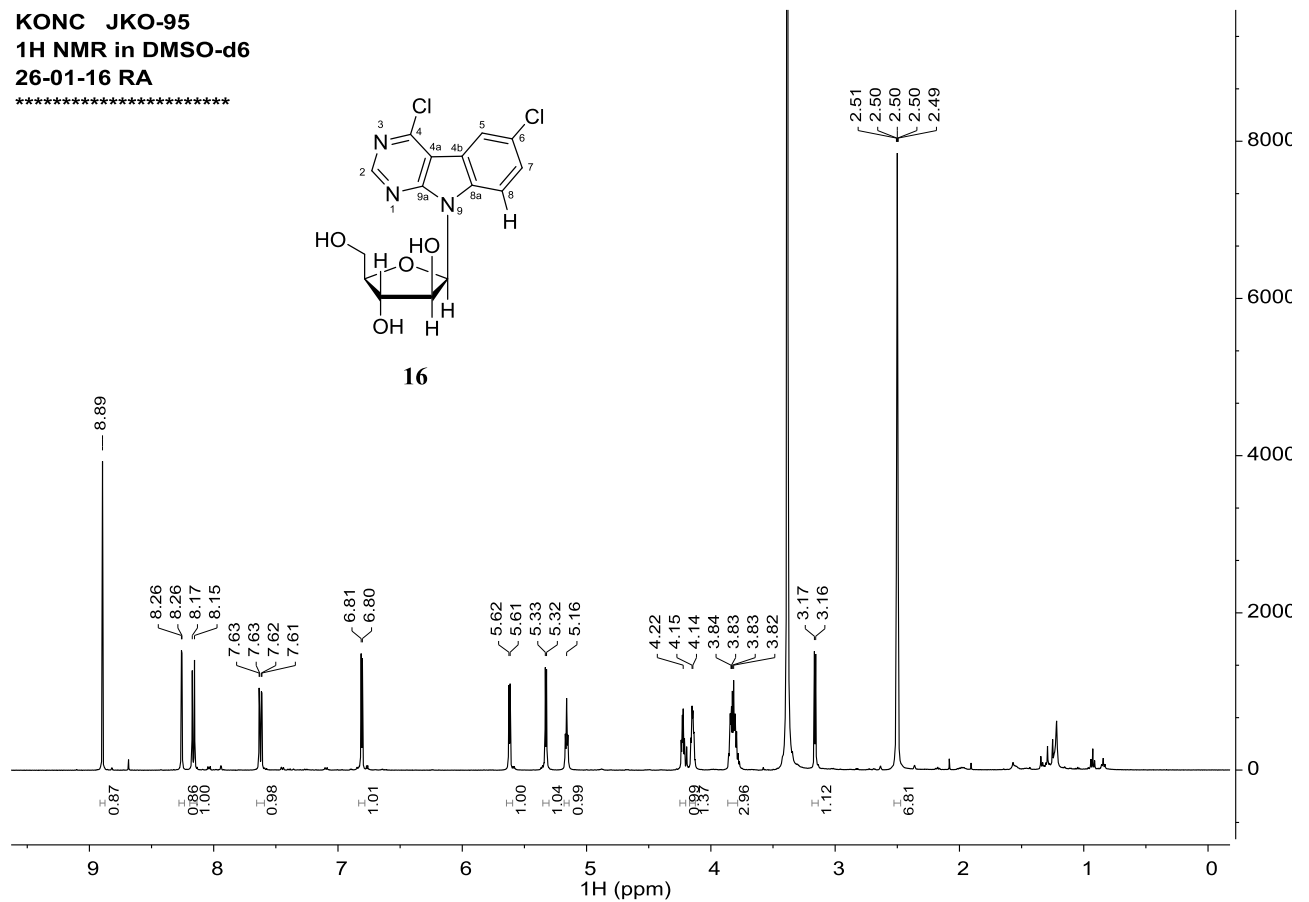

KONC JKO-95  
APT in DMSO-d6  
26-01-16 RA

\*\*\*\*\*

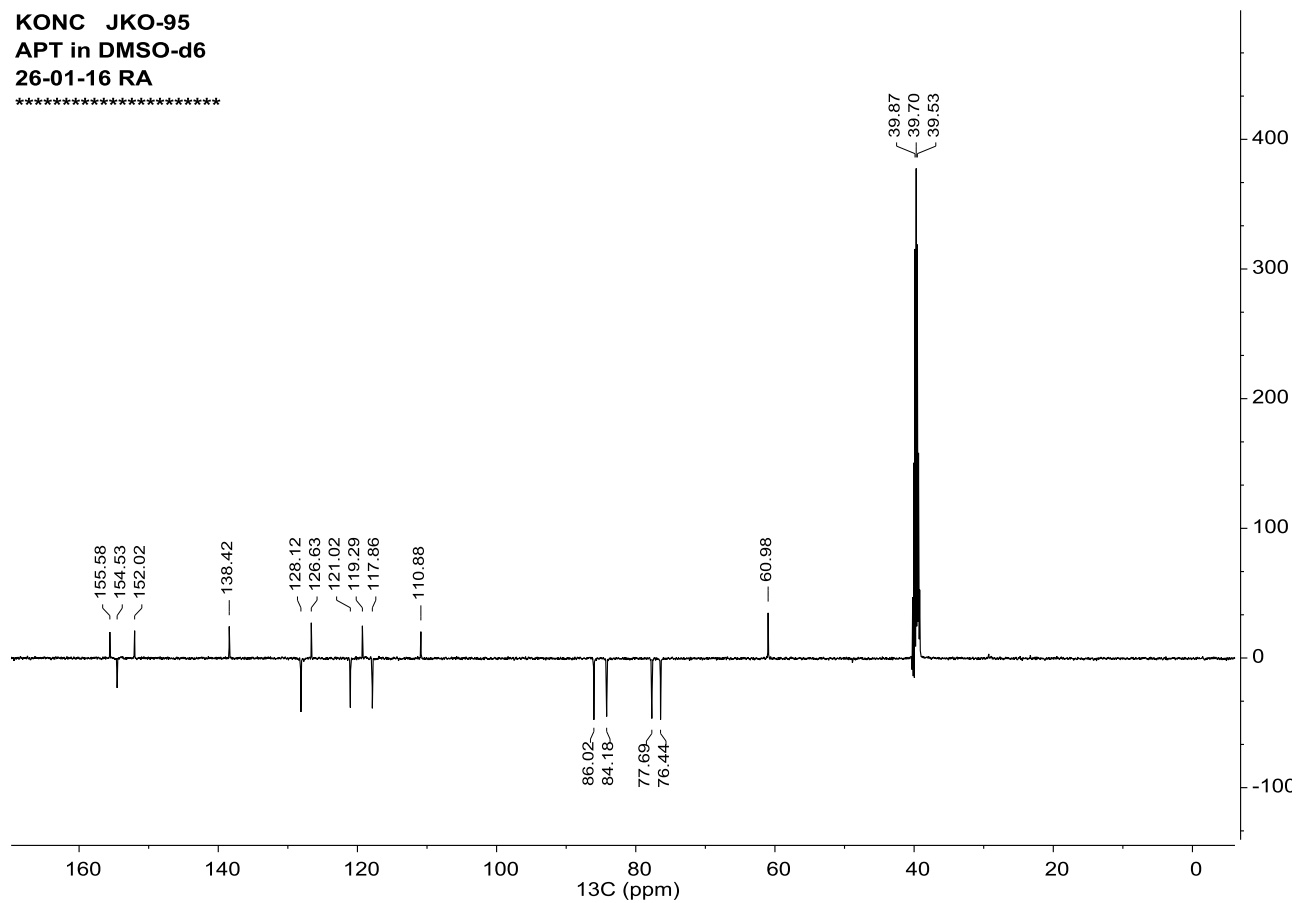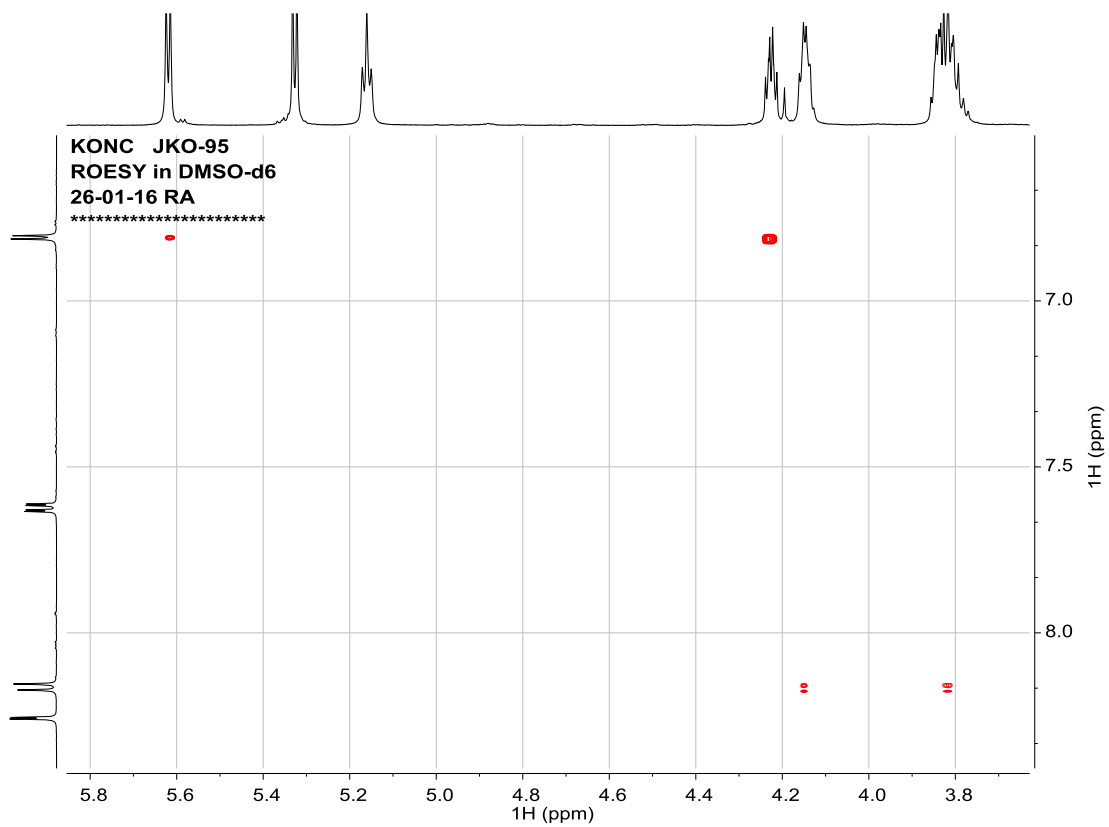

KONC JKO-171  
 1H NMR in DMSO-d6  
 02-05-16 RA  
 \*\*\*\*\*

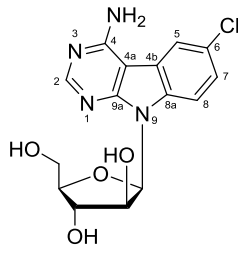

17a

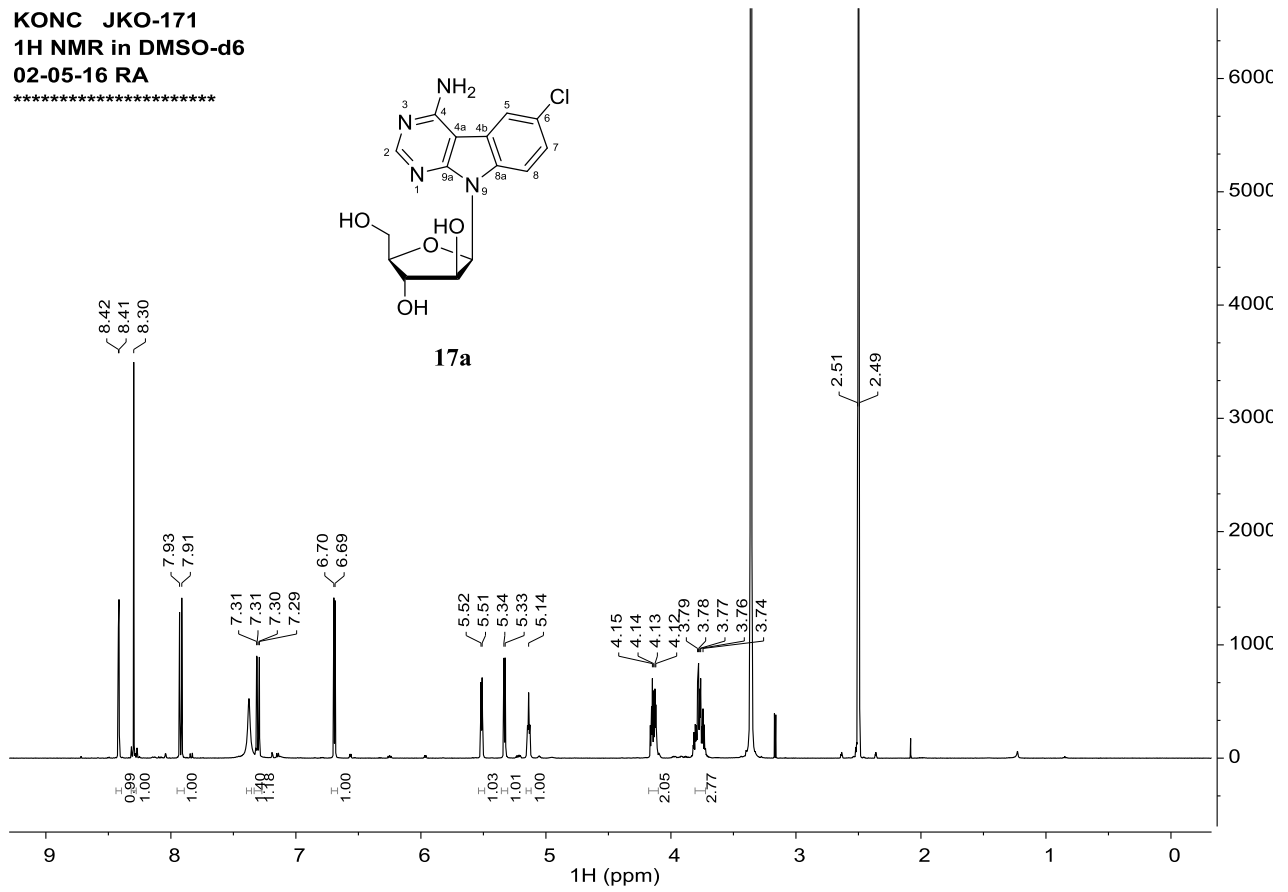

KONC JKO-171  
 APT in DMSO-d6  
 02-05-16 RA  
 \*\*\*\*\*

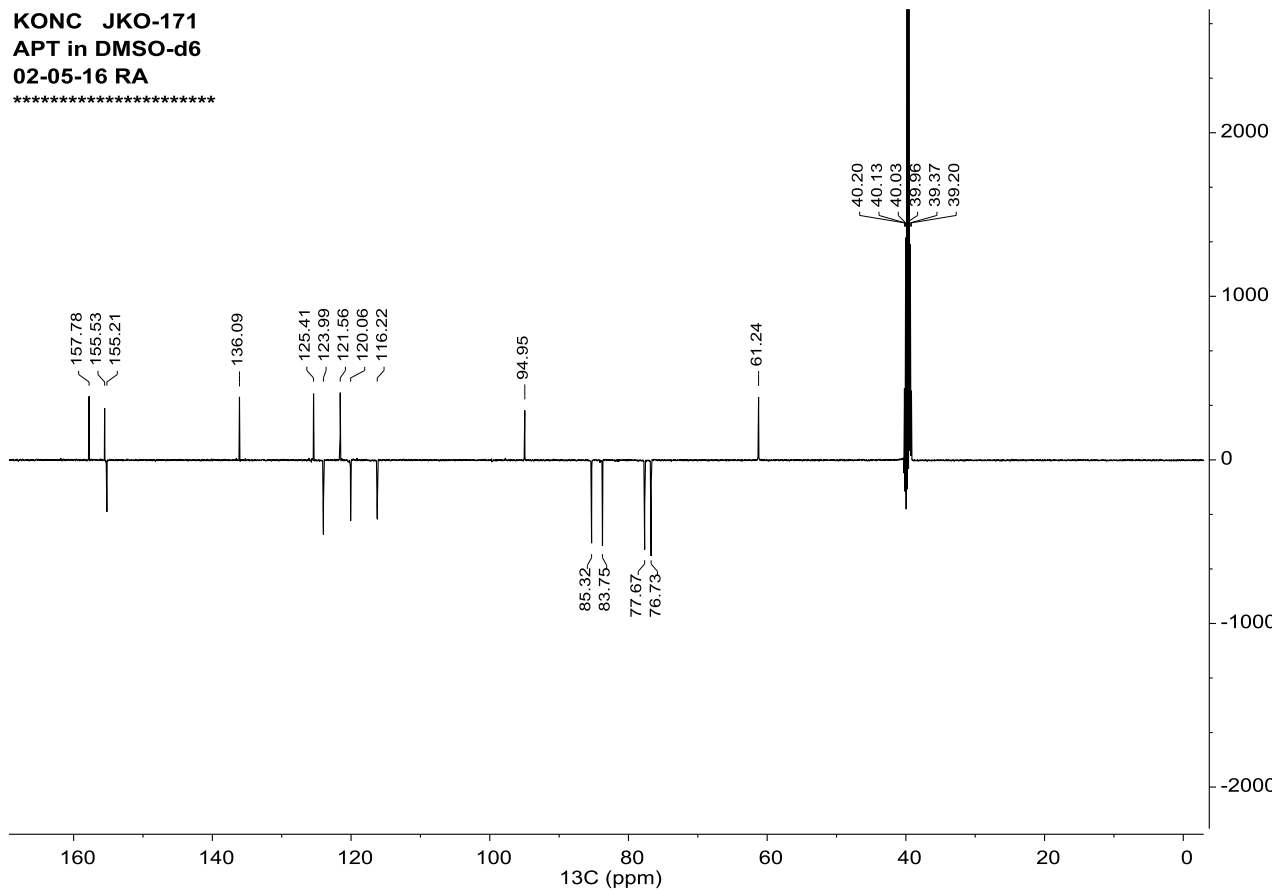

KONC JKO-137  
 1H NMR in DMSO-d6  
 08-04-16 RA  
 \*\*\*\*\*

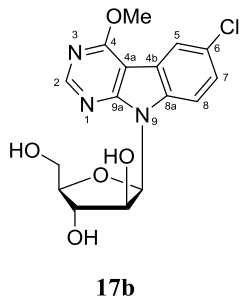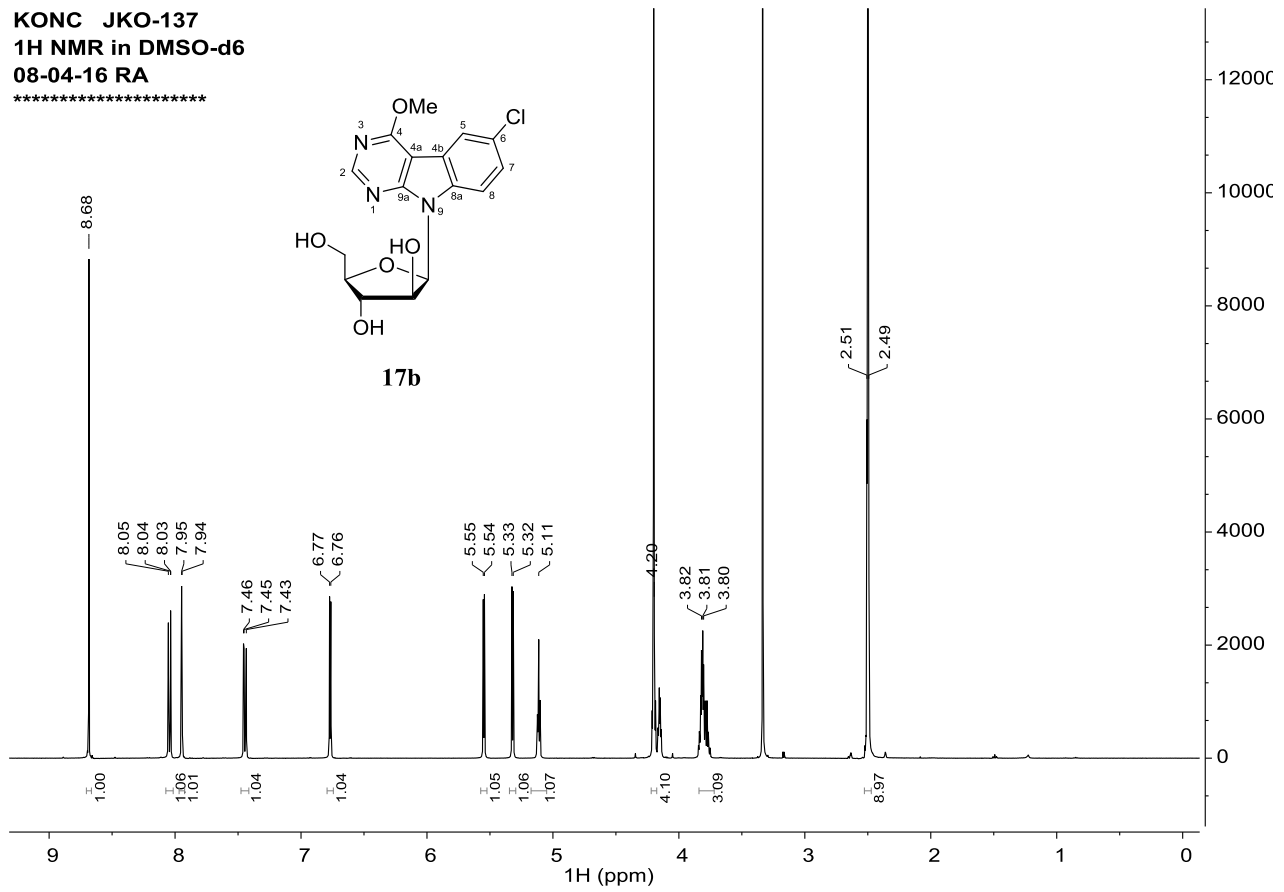

KONC JKO-137  
 APT in DMSO-d6  
 08-04-16 RA  
 \*\*\*\*\*

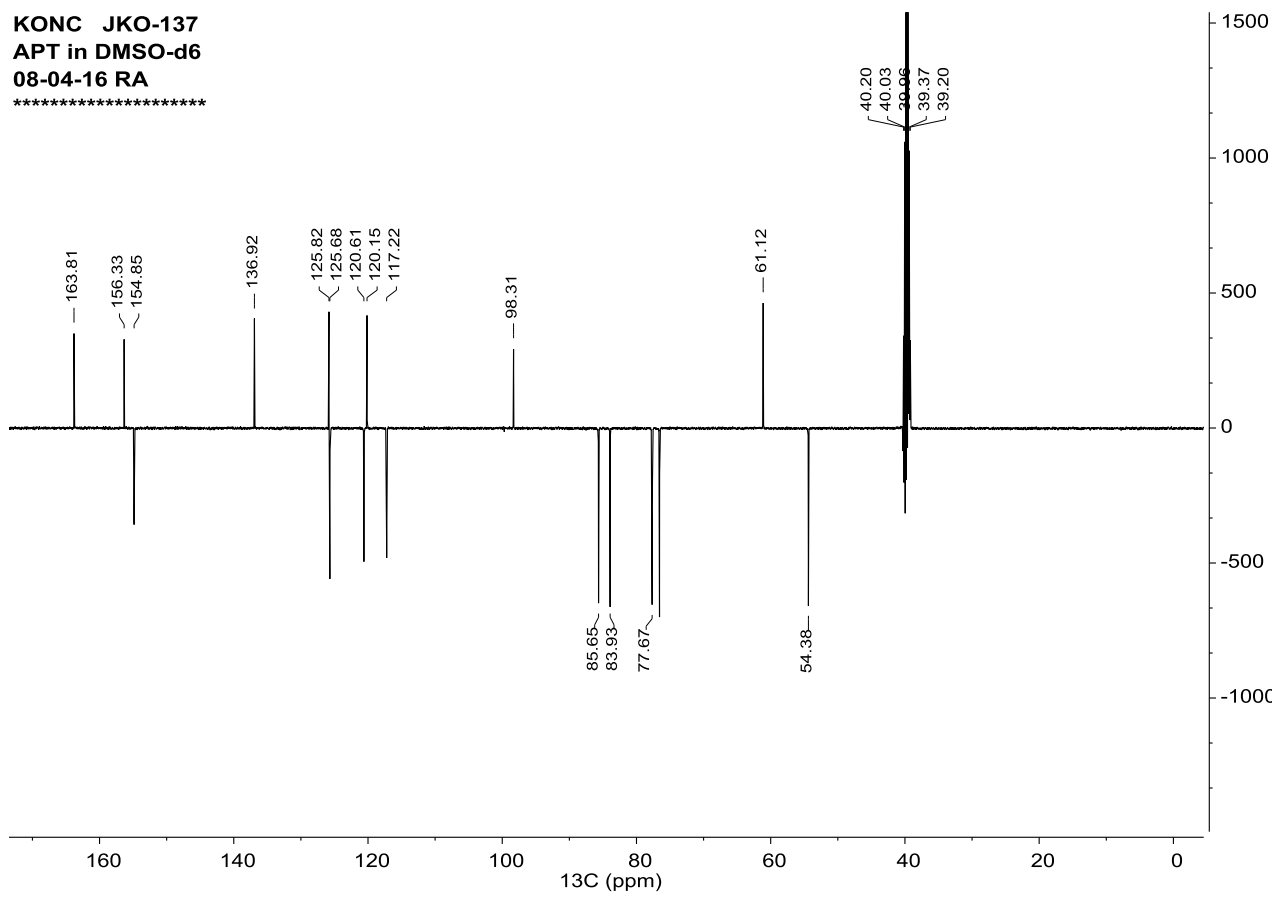



KONC JKO-136  
1H NMR in DMSO-d6  
08-04-16 RA

\*\*\*\*\*

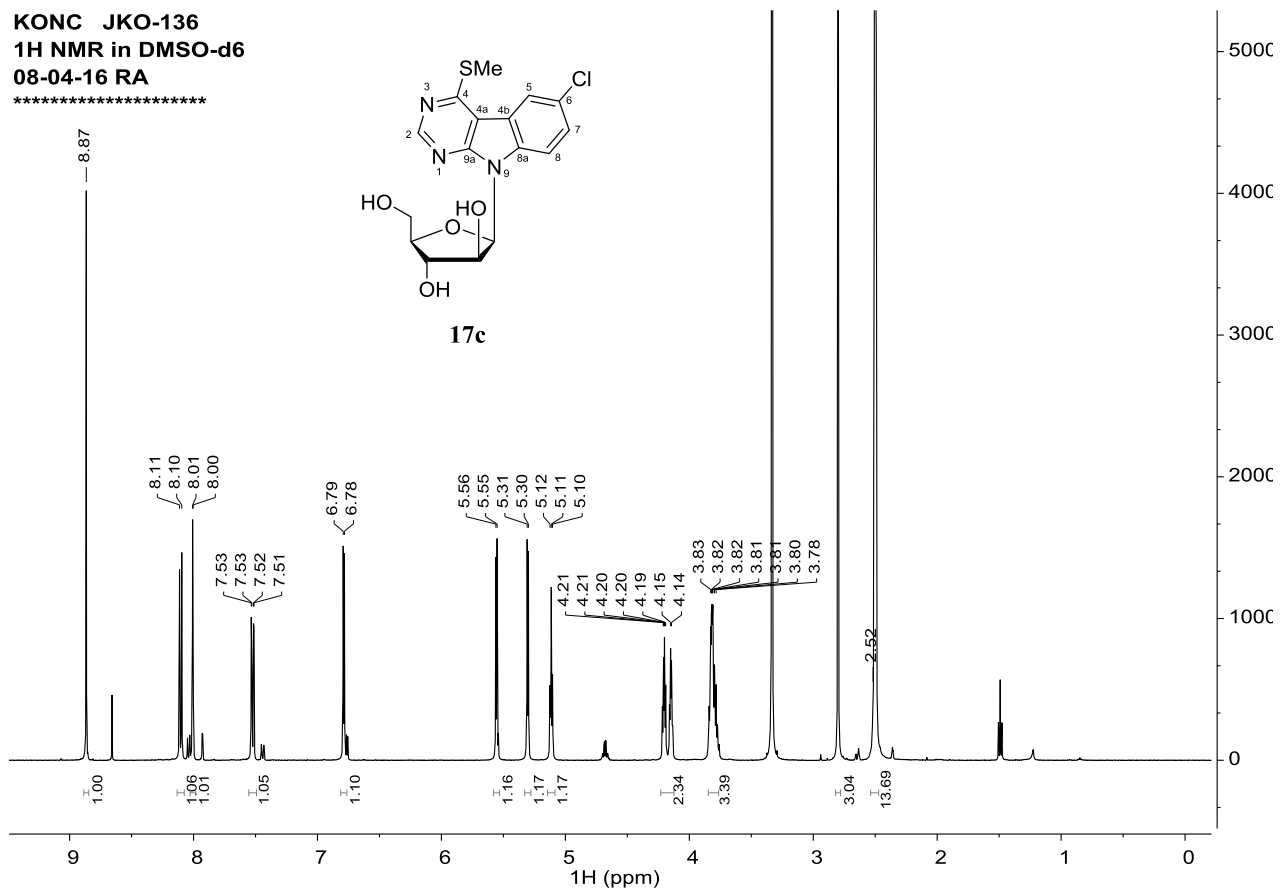

KONC JKO-136  
APT in DMSO-d6  
08-04-16 RA

\*\*\*\*\*

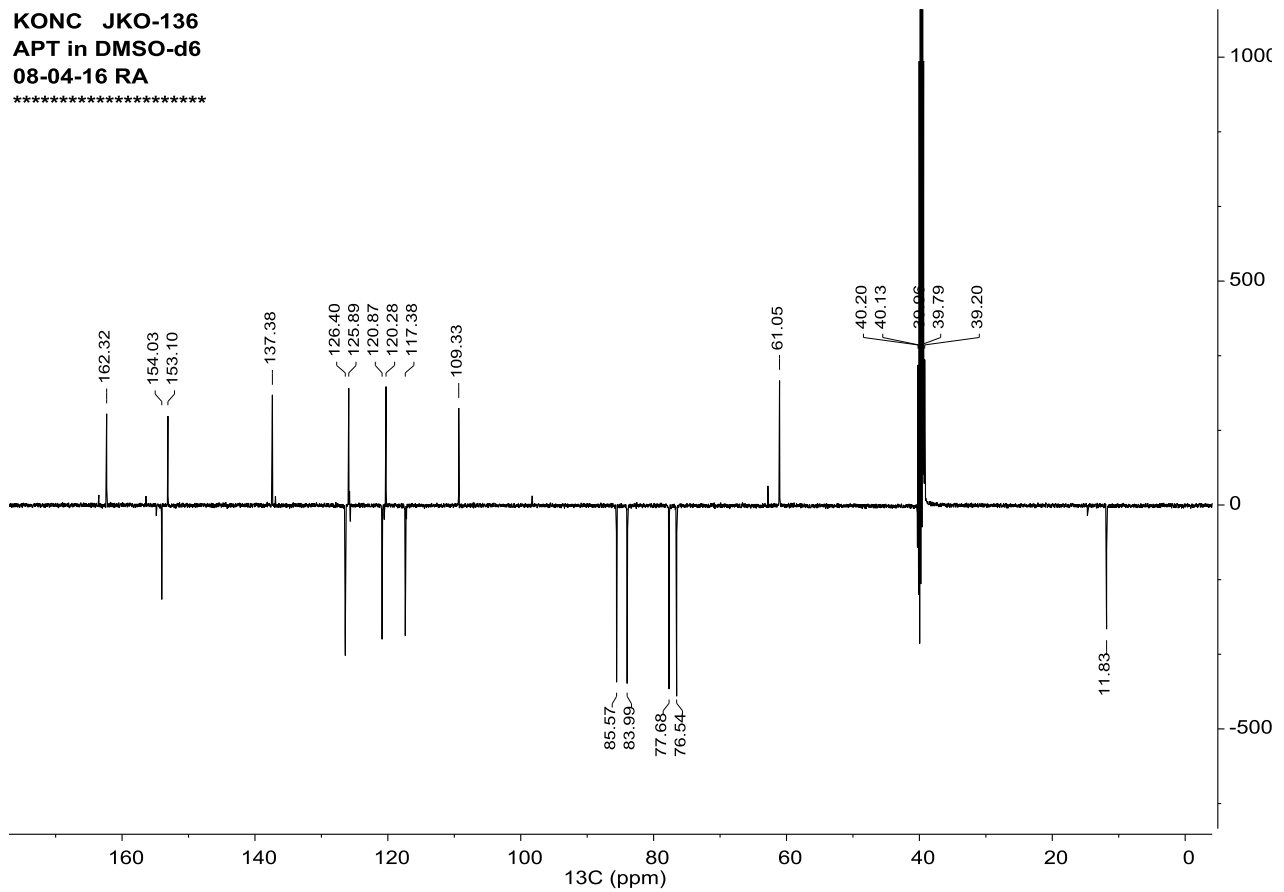

KONC JKO-138  
 1H NMR in DMSO-d6  
 08-04-16 RA  
 \*\*\*\*\*

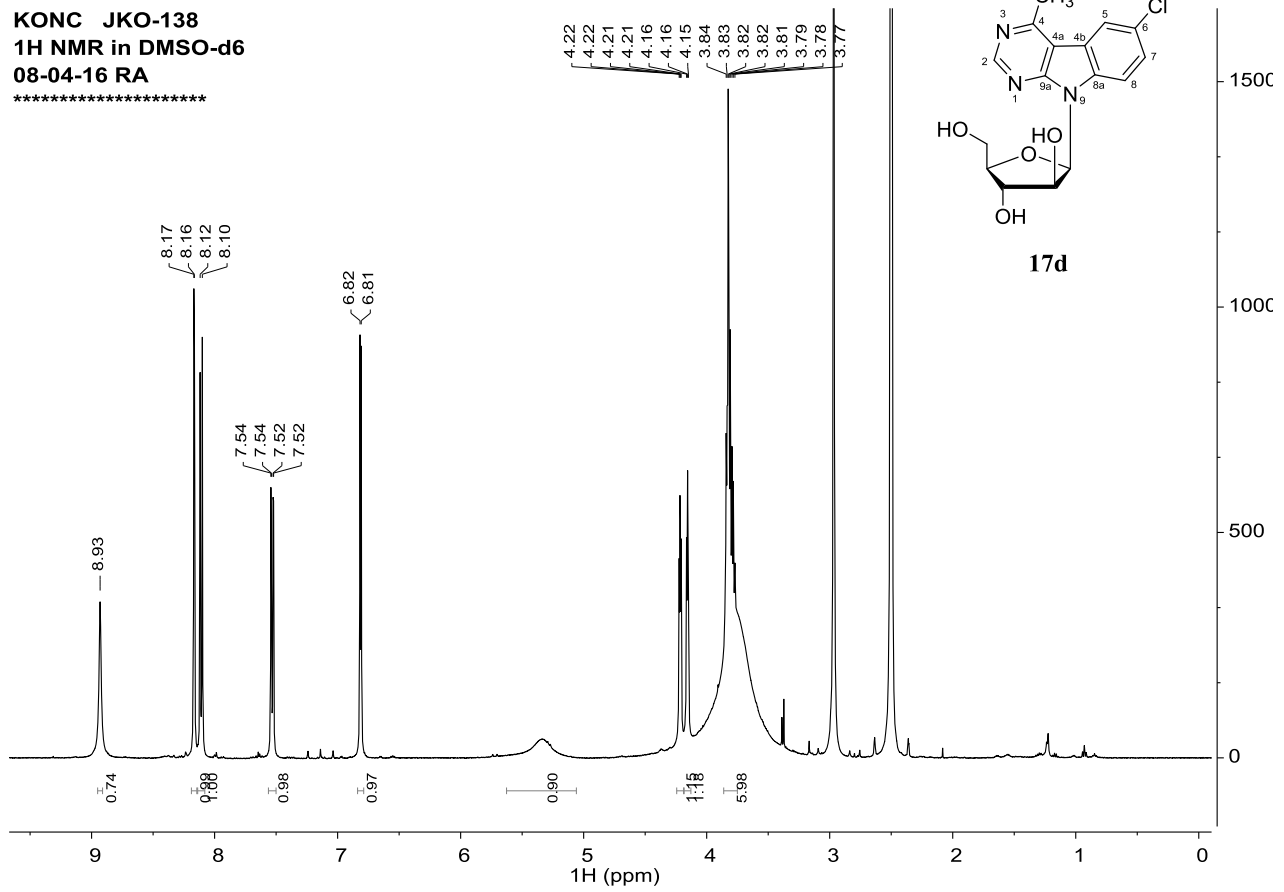

KONC JKO-138  
 APT in DMSO-d6  
 08-04-16 RA  
 \*\*\*\*\*

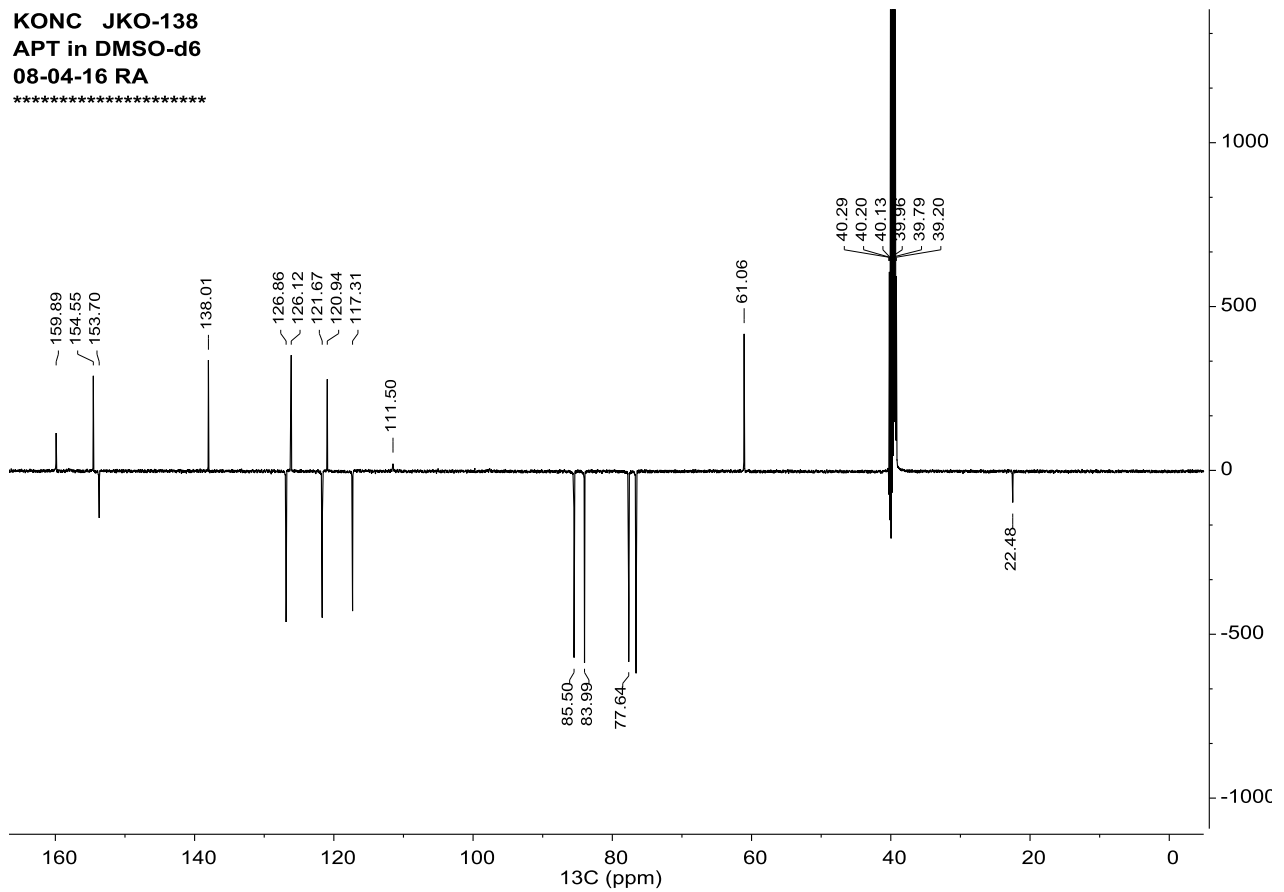

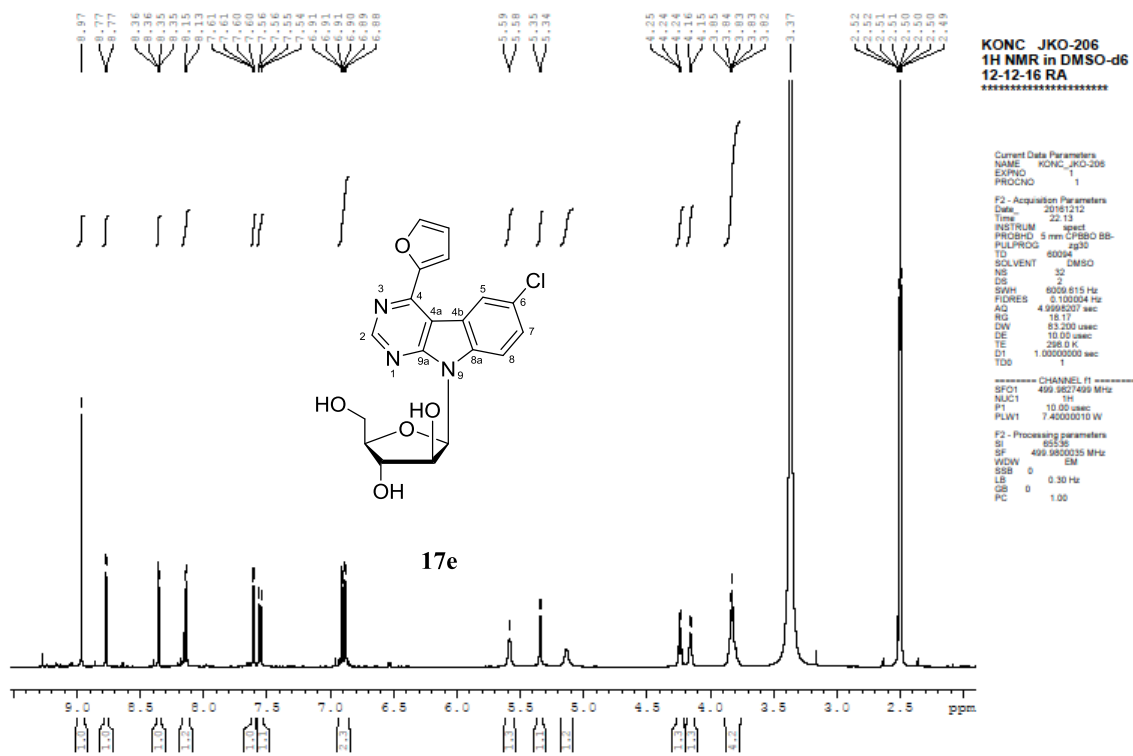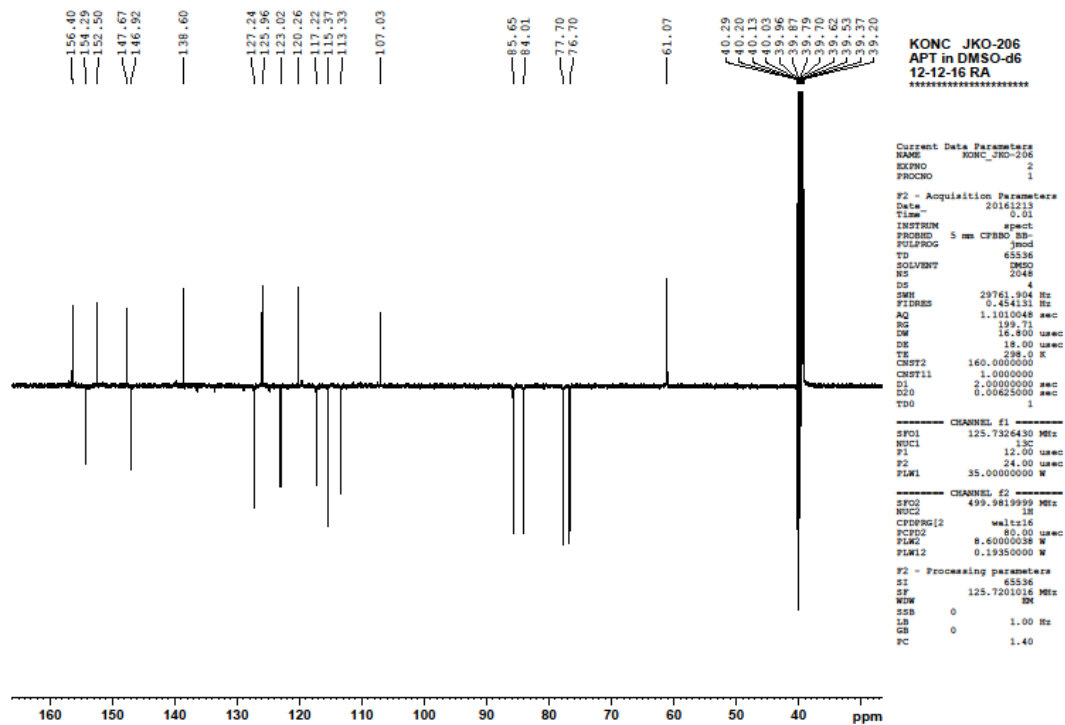

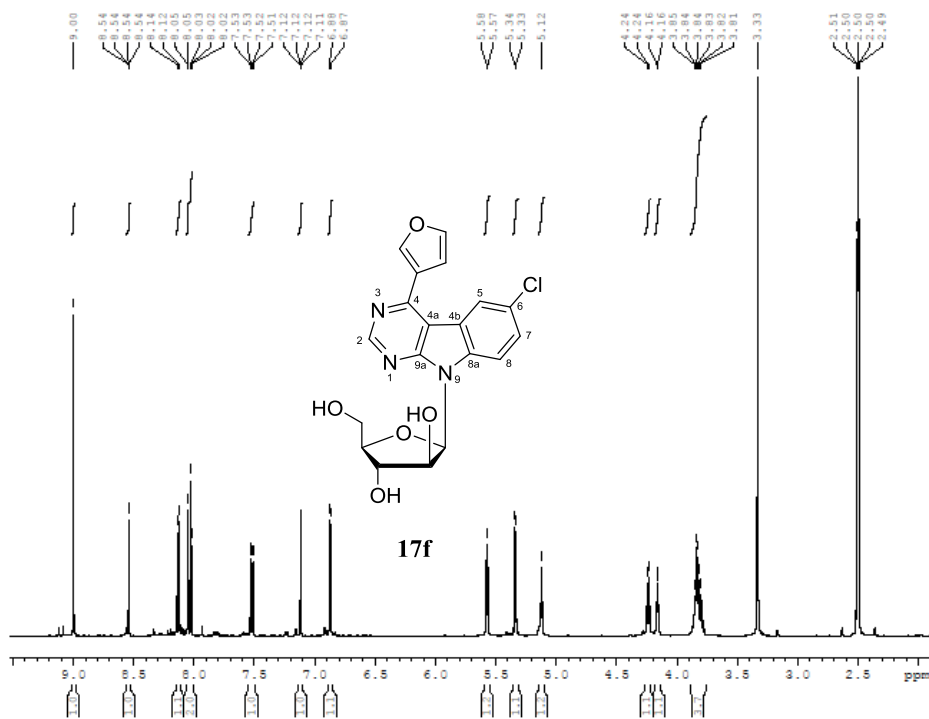

KONC\_JKO-207  
1H NMR in DMSO-d6  
12-12-16 RA  
\*\*\*\*\*

Current Data Parameters  
NAME KONC\_JKO-207  
EXPNO 2  
PROCNO 1

F2 - Acquisition Parameters  
Date\_ 20161213  
Time 1.14  
INSTRUM spect  
PROBHD 5 mm CPBBO BB-  
PULPROG zg30  
TD 60094  
SOLVENT DMSO  
NS 32  
DS 2  
SWH 6009.815 Hz  
FIDRES 0.100004 Hz  
AQ 4.698207 sec  
RG 18.17  
DNW 83.203 usec  
DE 10.00 usec  
TE 298.0 K  
D1 1.0000000 sec  
TD0 1

----- CHANNEL f1 -----  
SFO1 499.9827499 MHz  
NUC1 1H  
P1 10.00 usec  
PLW1 7.4000010 W

F2 - Processing parameters  
SI 6536  
SF 499.9800035 MHz  
WENW 18  
SSB 0  
LB 0.30 Hz  
GB 0  
PC 1.00

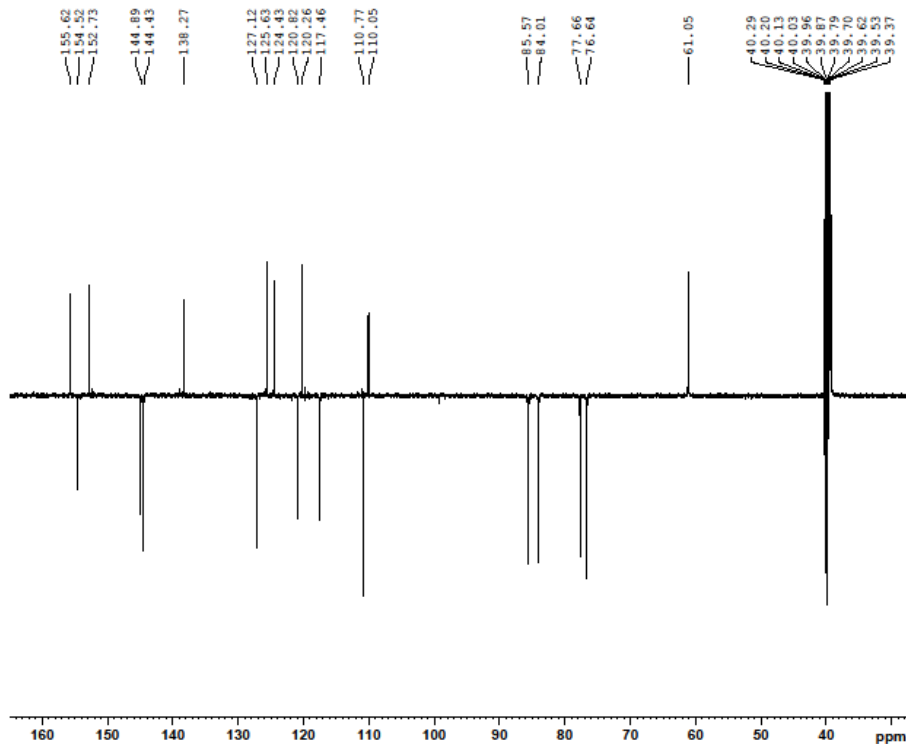

KONC\_JKO-207  
APT in DMSO-d6  
12-12-16 RA  
\*\*\*\*\*

Current Data Parameters  
NAME KONC\_JKO-207  
EXPNO 2  
PROCNO 1

F2 - Acquisition Parameters  
Date\_ 20161213  
Time 3.52  
INSTRUM spect  
PROBHD 5 mm CPBBO BB-  
PULPROG zgpg30  
TD 65336  
SOLVENT DMSO  
NS 2048  
DS 4  
SWH 29761.304 Hz  
FIDRES 0.454131 Hz  
AQ 1.1010048 sec  
RG 159.71  
DNW 16.800 usec  
DE 18.00 usec  
TE 298.0 K  
CNSF2 160.0000000  
CNSF11 1.0000000  
D1 2.0000000 sec  
D20 0.00625000 sec  
TD0 1

----- CHANNEL f1 -----  
SFO1 125.7326430 MHz  
NUC1 13C  
P1 12.00 usec  
P2 24.00 usec  
PIW1 35.00000000 W

----- CHANNEL f2 -----  
SFO2 499.9819999 MHz  
NUC2 1H  
CPDPRG2 waltz16  
PCPD2 80.00 usec  
PINC 8.60000038 W  
PIW2 0.19350000 W

F2 - Processing parameters  
SI 32768  
SF 125.7201057 MHz  
WENW 18  
SSB 0  
LB 1.00 Hz  
GB 0  
PC 1.40

KONC JKO-174  
 1H NMR in DMSO-d6  
 02-05-16 RA

\*\*\*\*\*

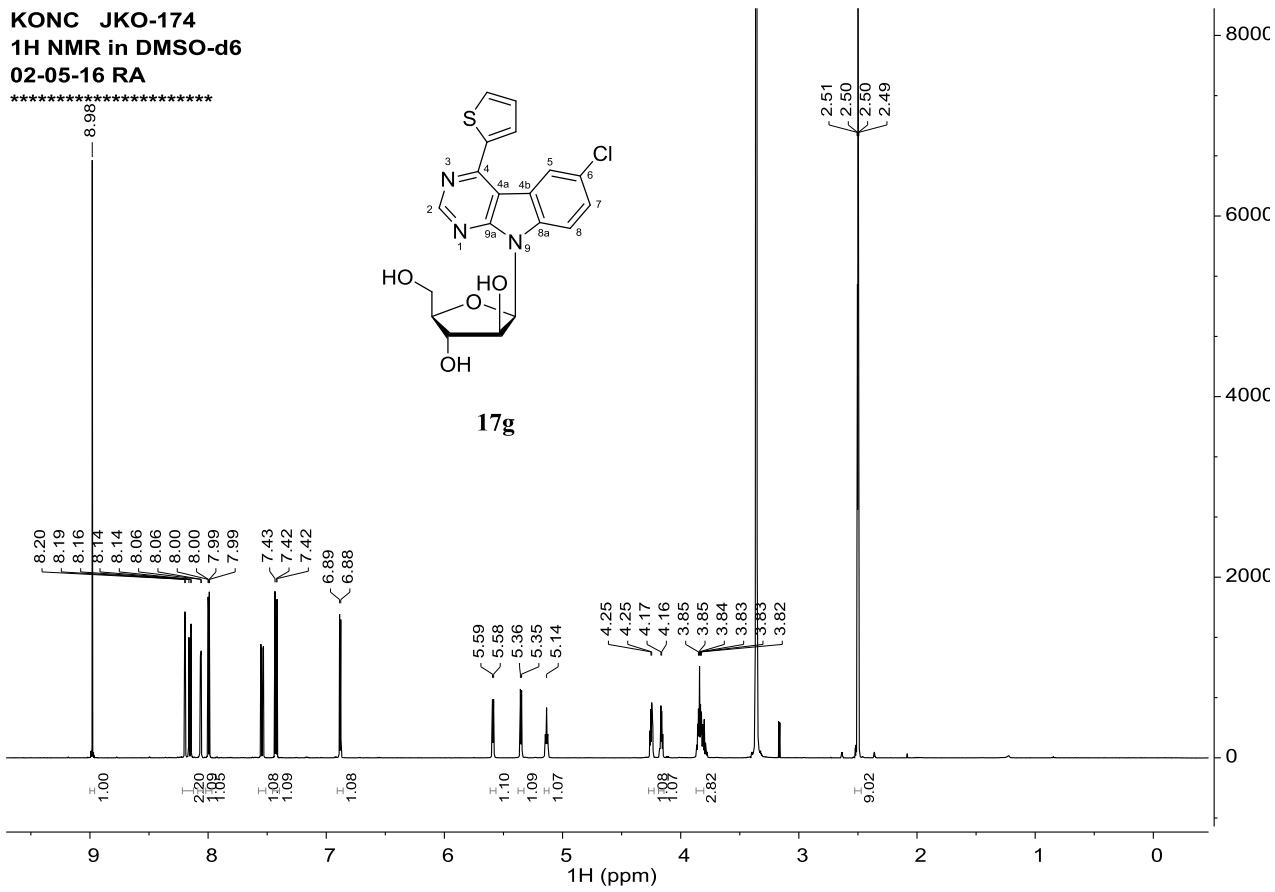

KONC JKO-174  
 APT in DMSO-d6  
 02-05-16 RA

\*\*\*\*\*

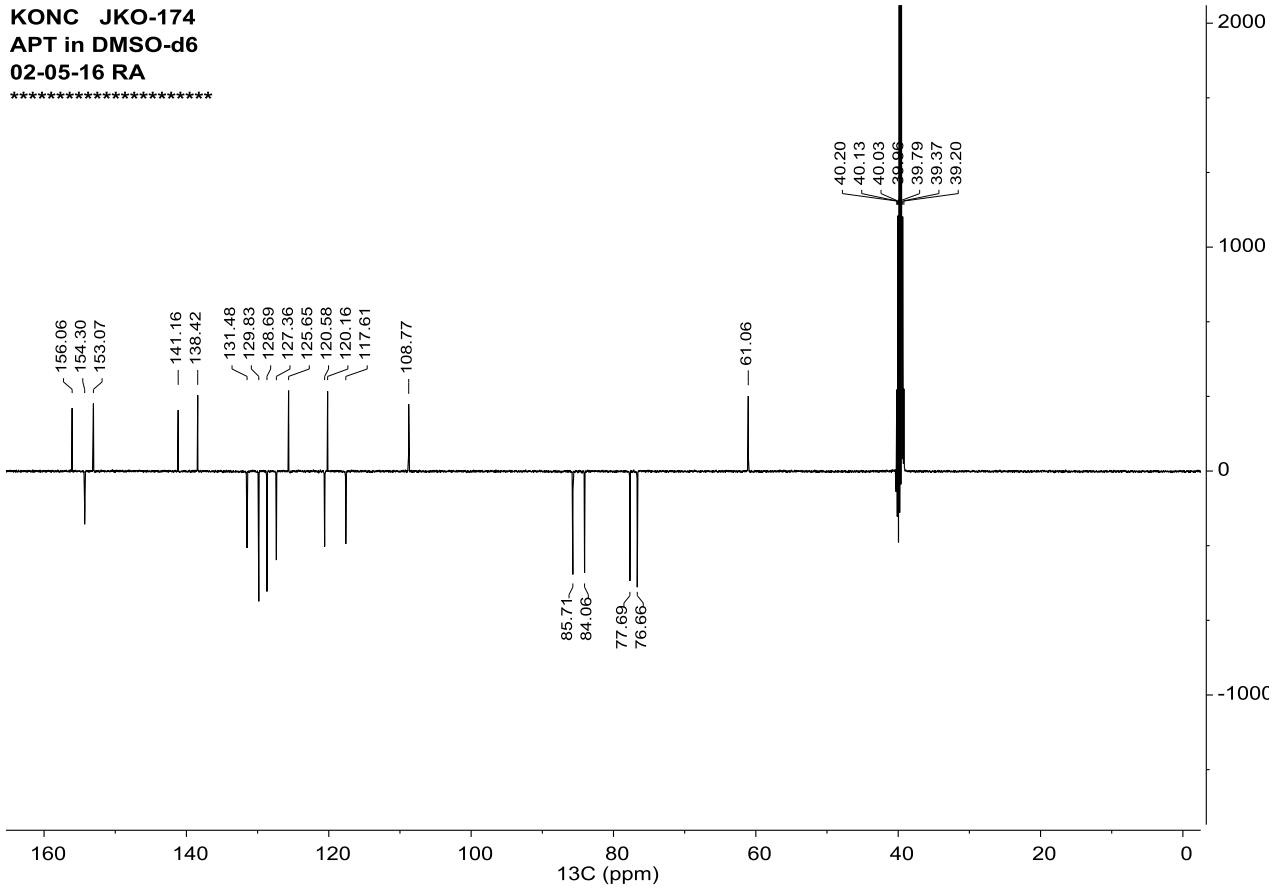

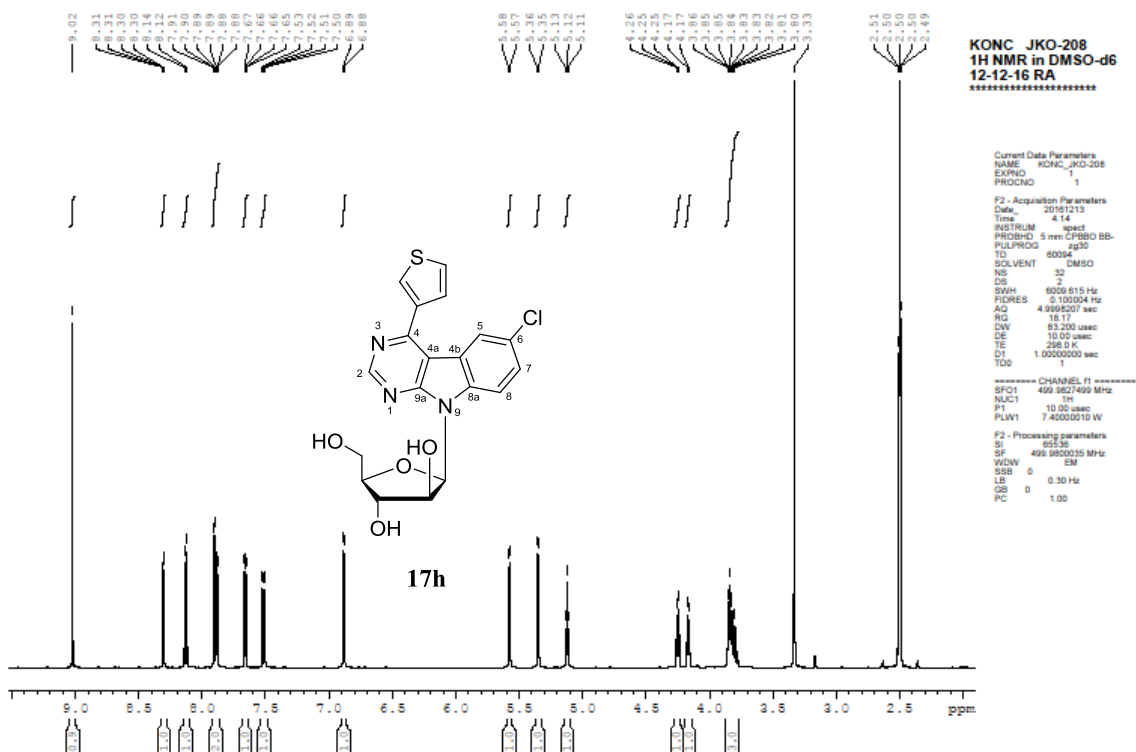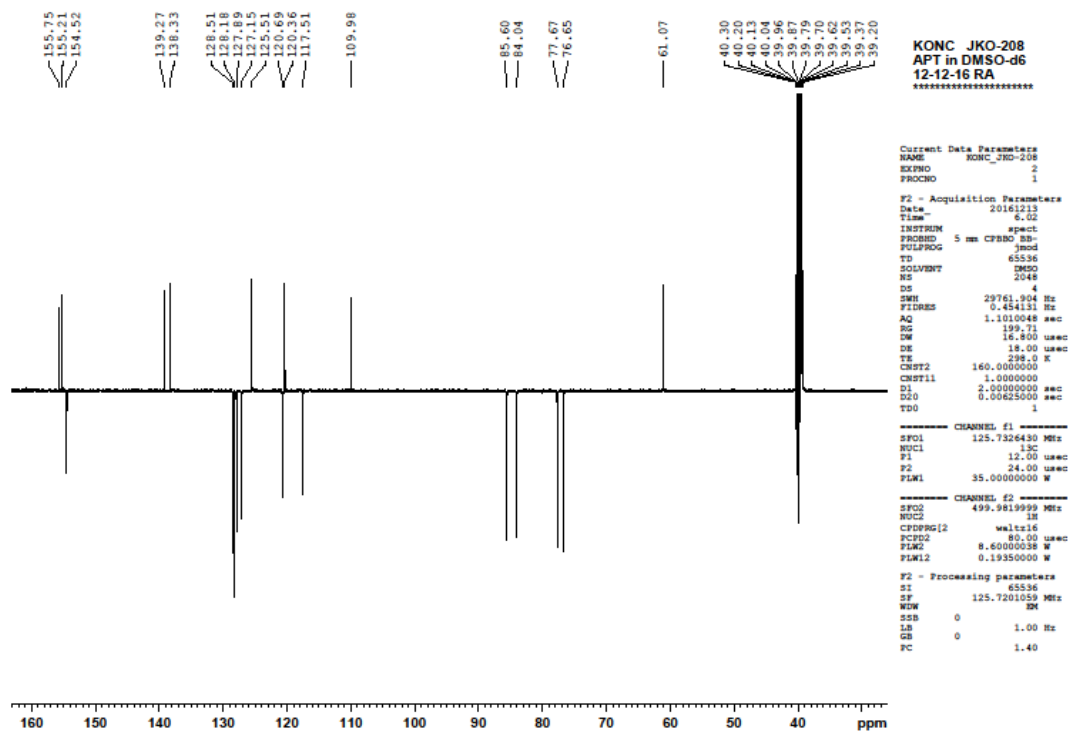

KONC JKO-175  
 1H NMR in DMSO-d6  
 02-05-16 RA  
 \*\*\*\*\*

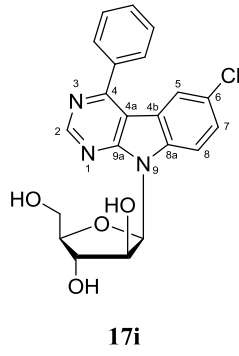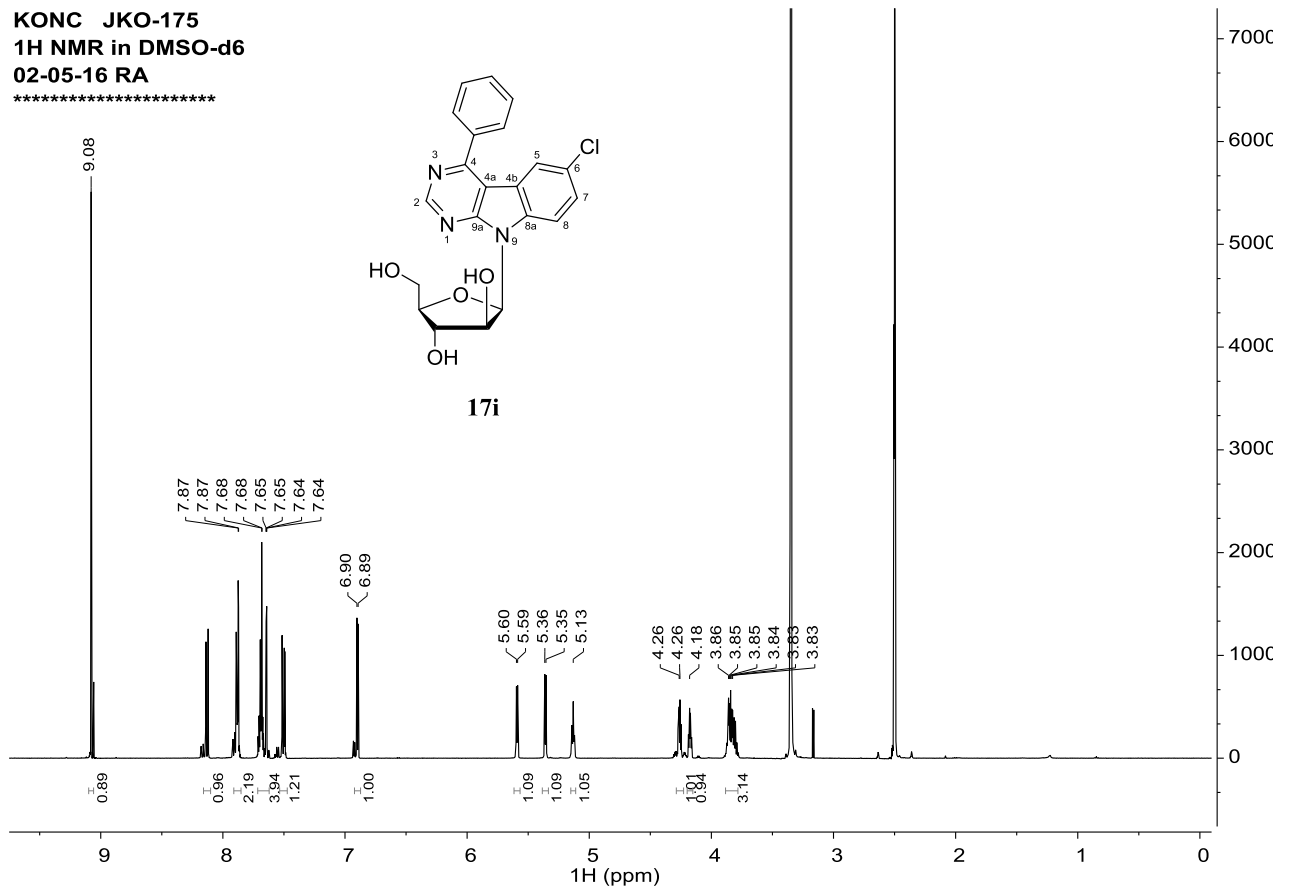

KONC JKO-175  
 APT in DMSO-d6  
 02-05-16 RA  
 \*\*\*\*\*

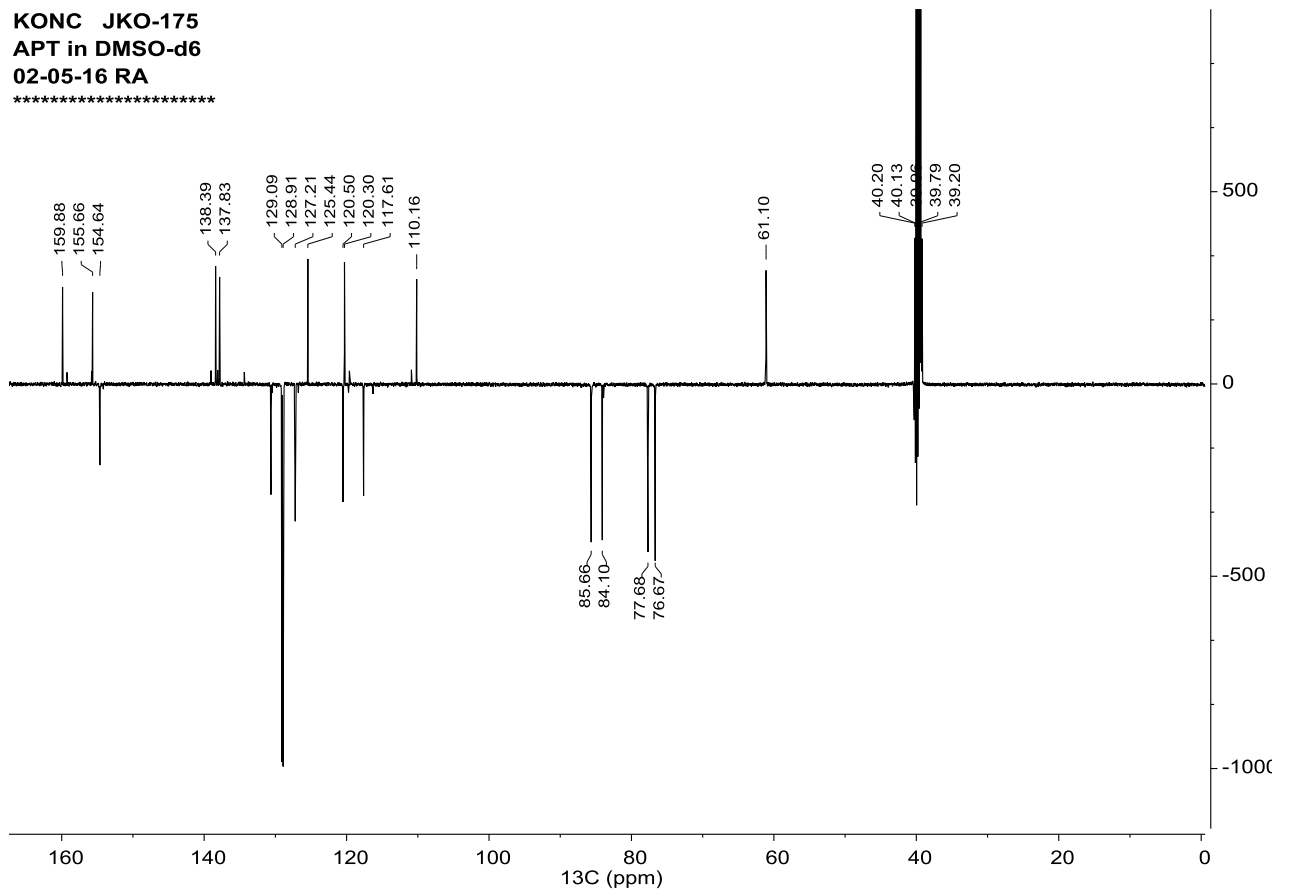

KONC JKO-96  
 1H NMR in CDCl<sub>3</sub>  
 30-03-16 RA  
 \*\*\*\*\*

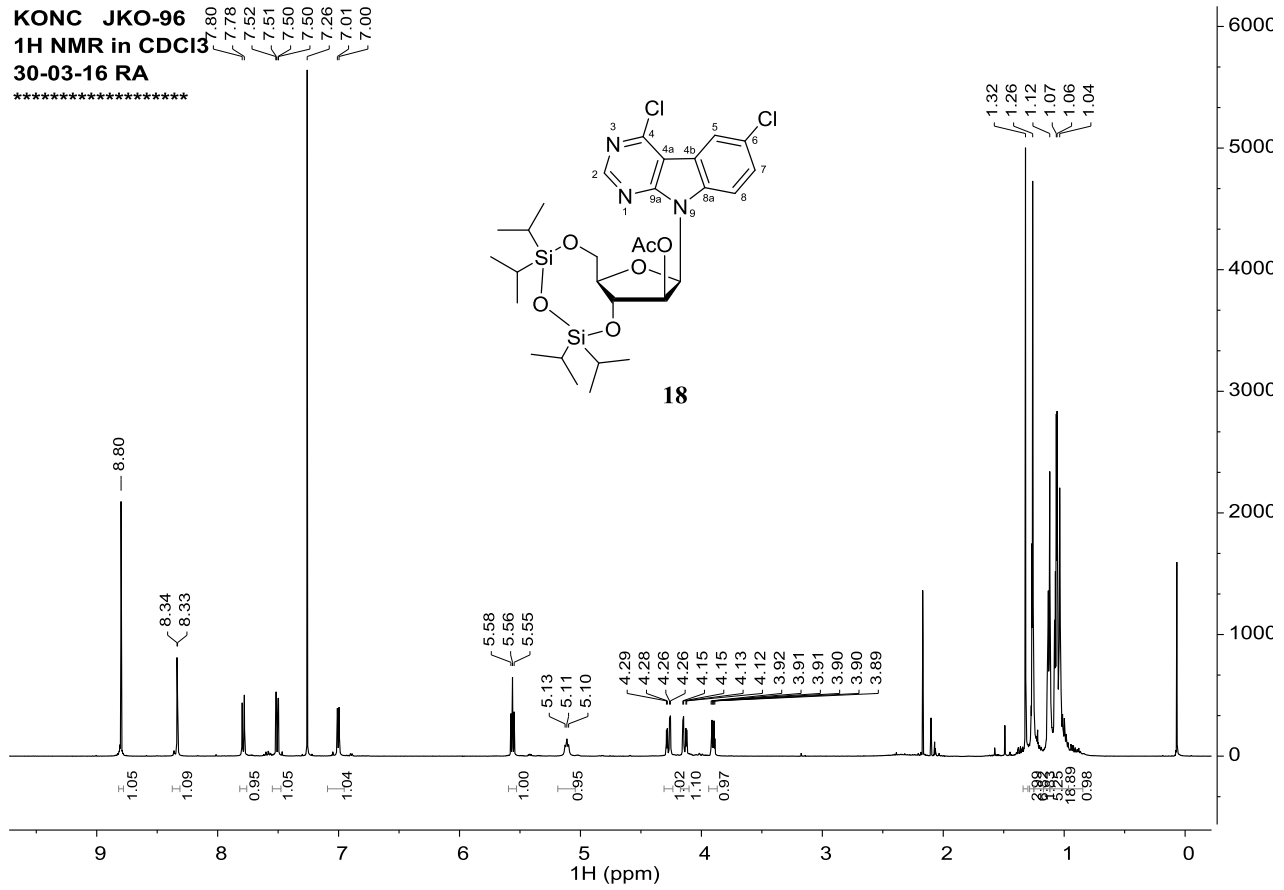

KONC JKO-96  
 APT in CDCl<sub>3</sub>  
 30-03-16 RA  
 \*\*\*\*\*

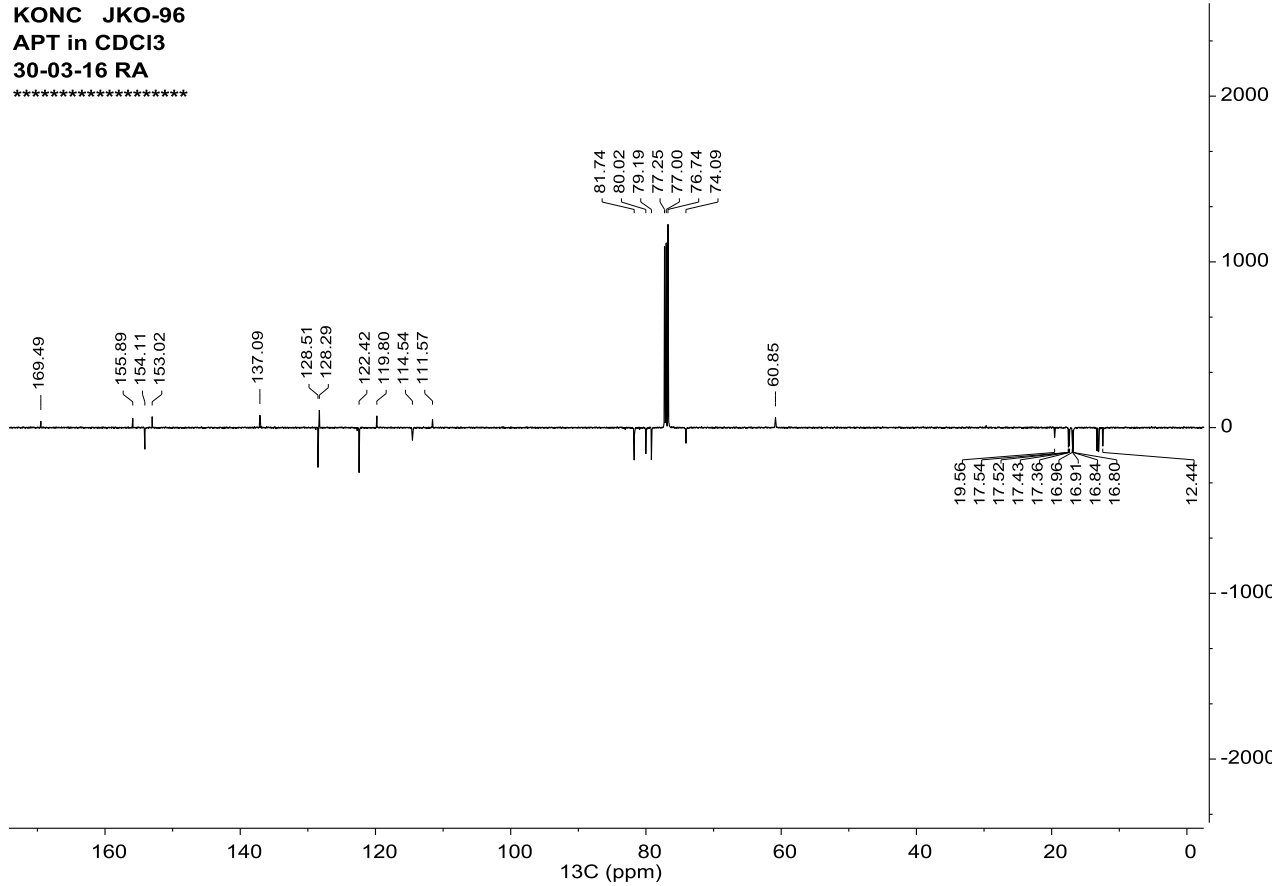



KONC JKO-97  
 1H NMR in DMSO-d6  
 08-04-16 RA  
 \*\*\*\*\*

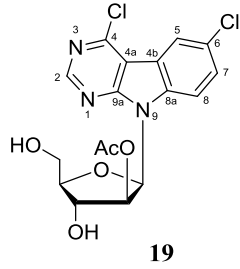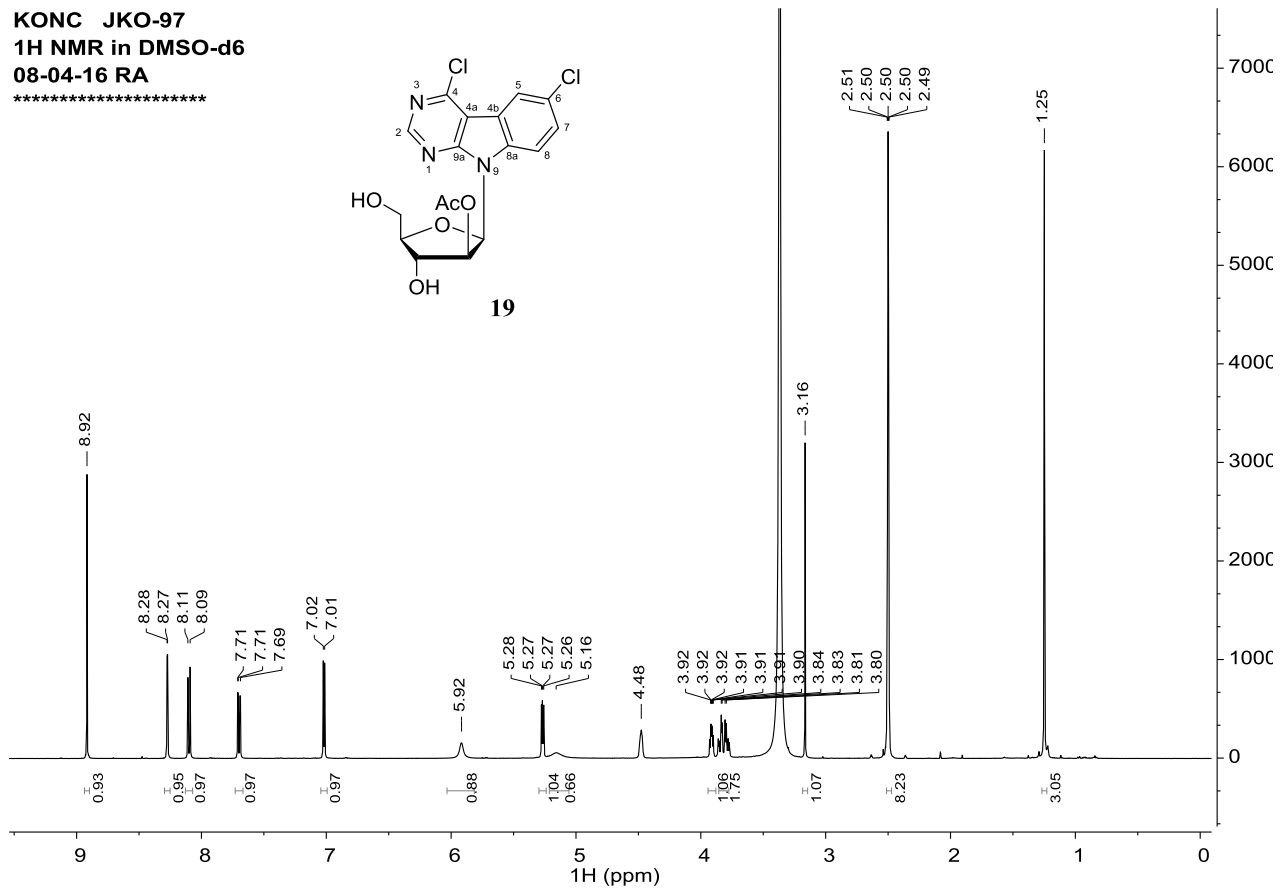

KONC JKO-97  
 APT in DMSO-d6  
 08-04-16 RA  
 \*\*\*\*\*

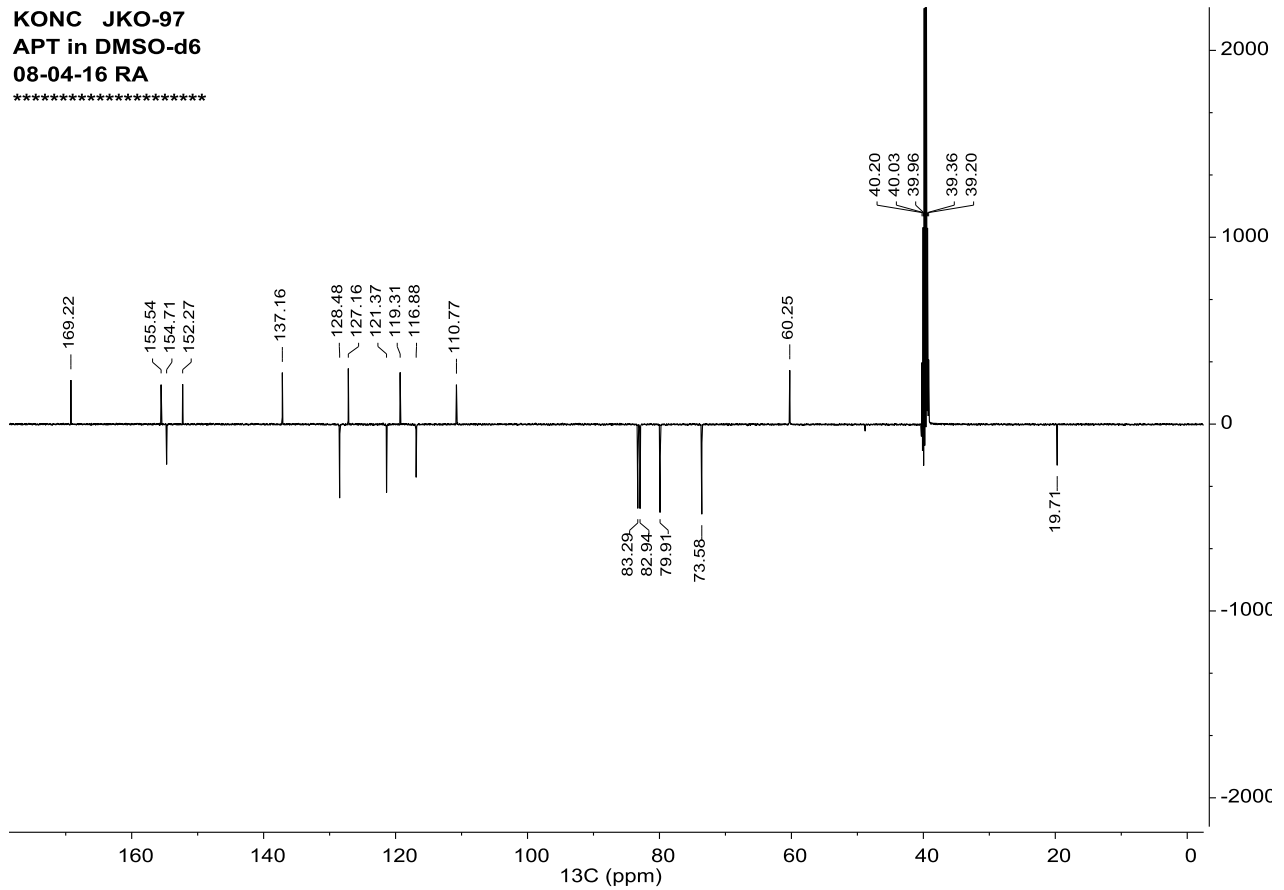

KONC JKO-155  
 1H NMR in DMSO-d6  
 29-04-16 RA  
 \*\*\*\*\*

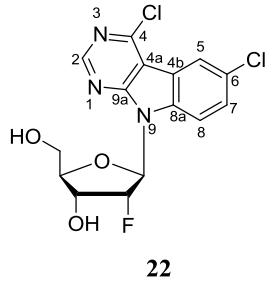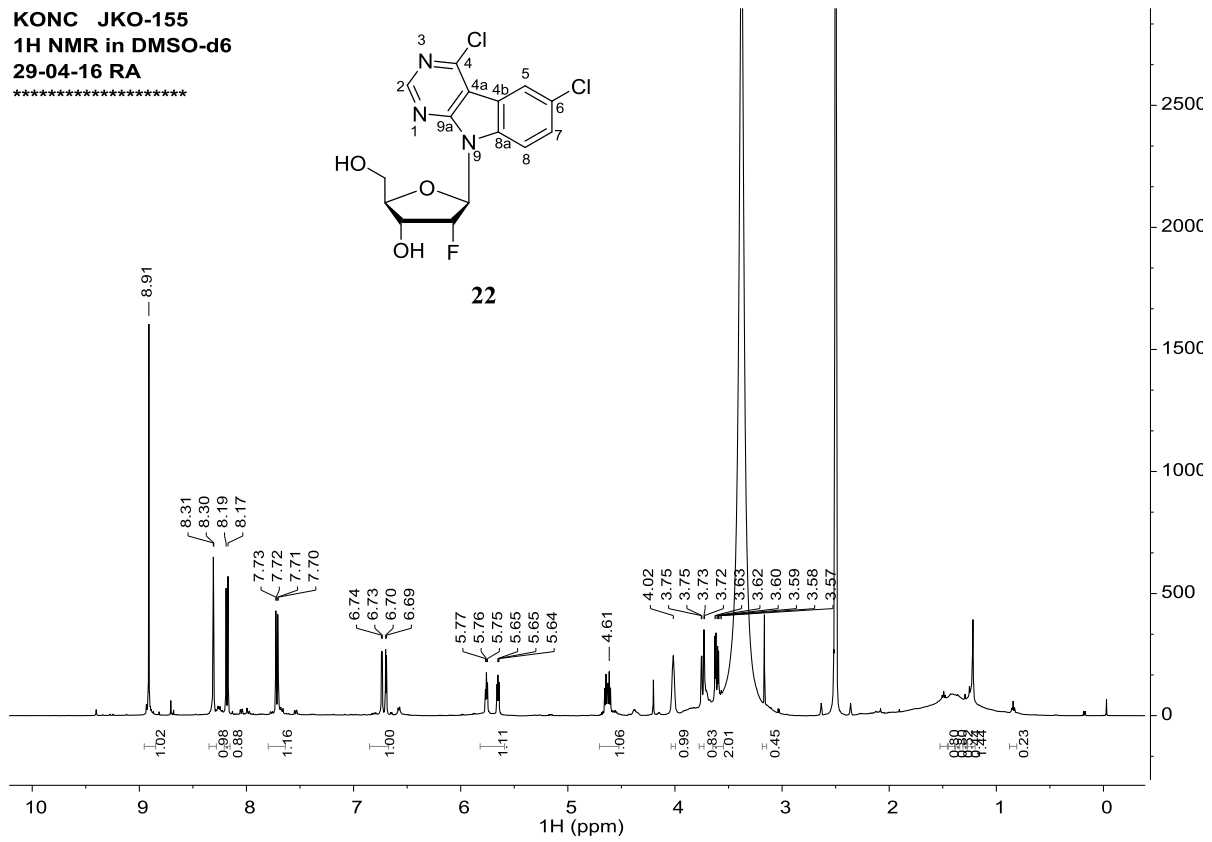

KONC JKO-155  
 APT in DMSO-d6  
 29-04-16 RA  
 \*\*\*\*\*

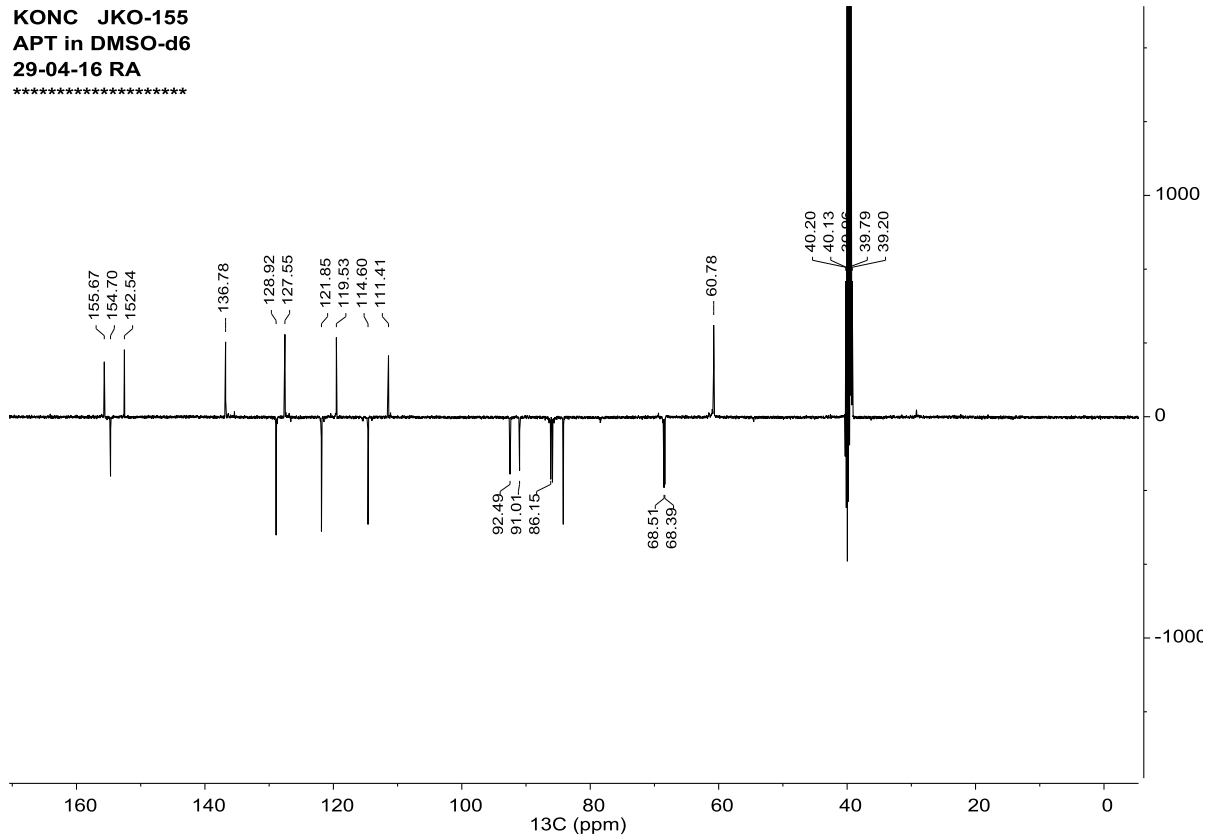

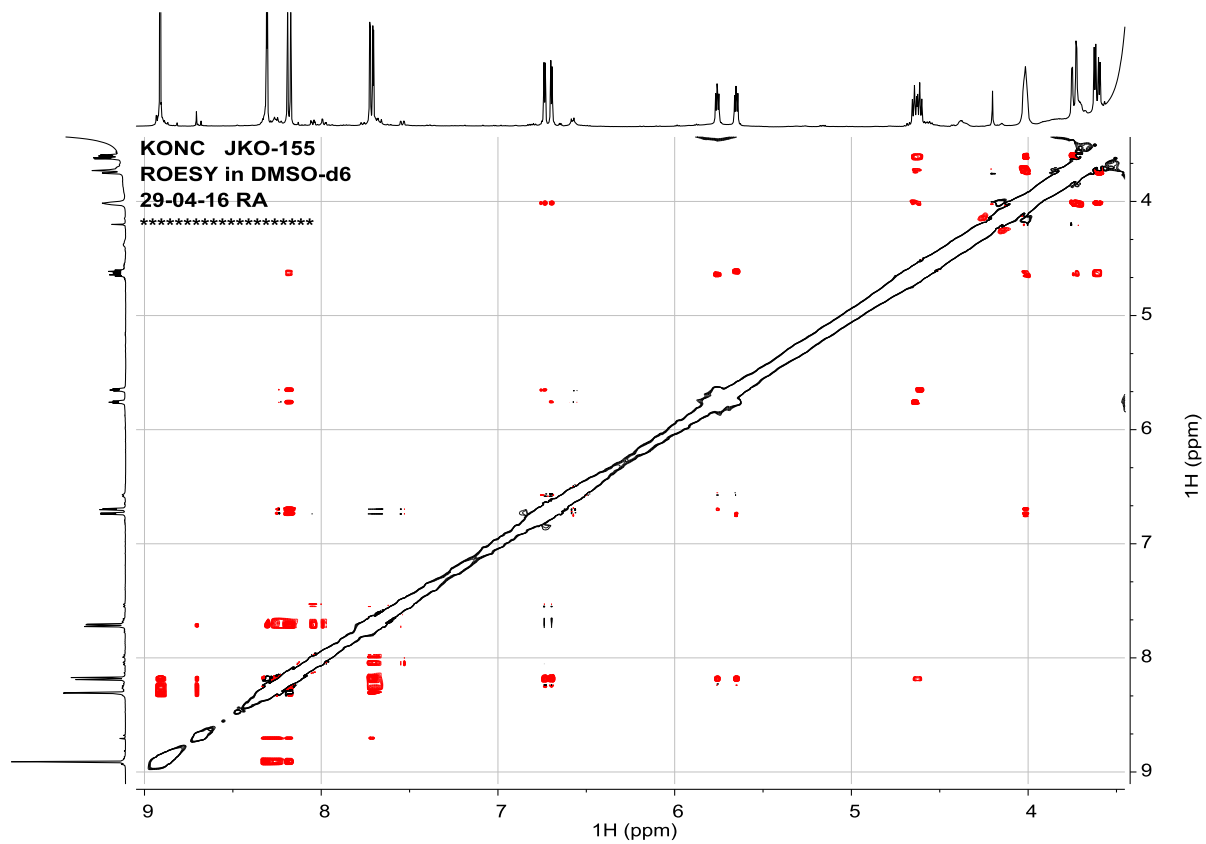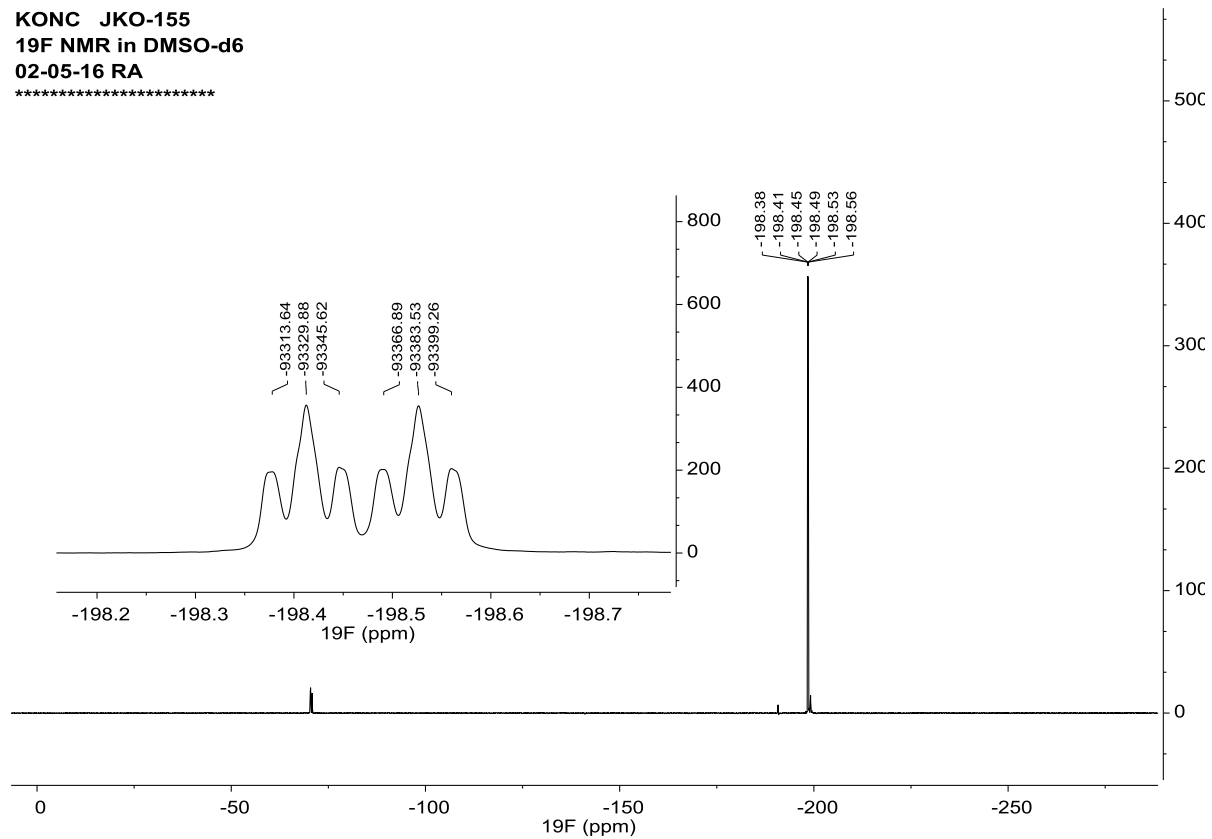

KONC JKO-172  
 1H NMR in DMSO-d6  
 02-05-16 RA  
 \*\*\*\*\*

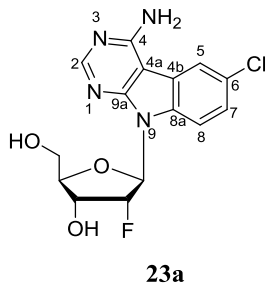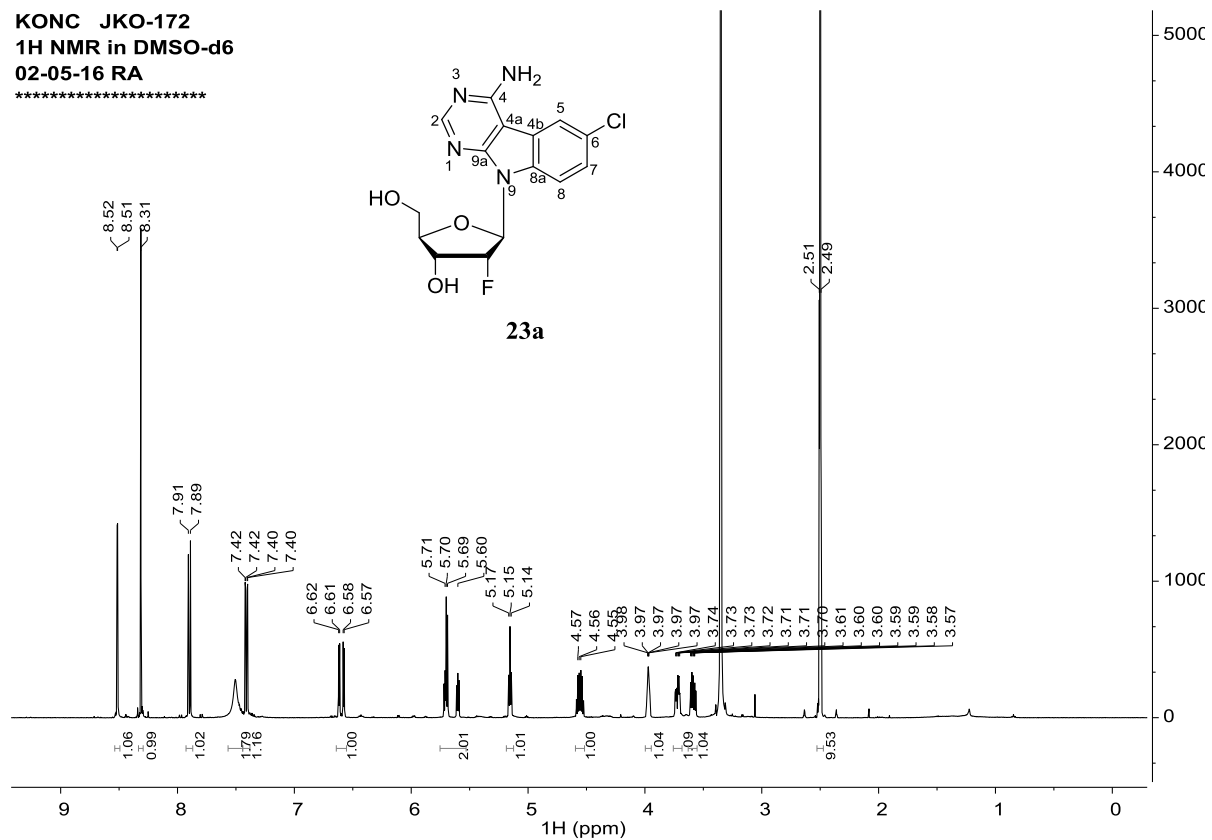

KONC JKO-172  
 APT in DMSO-d6  
 02-05-16 RA  
 \*\*\*\*\*

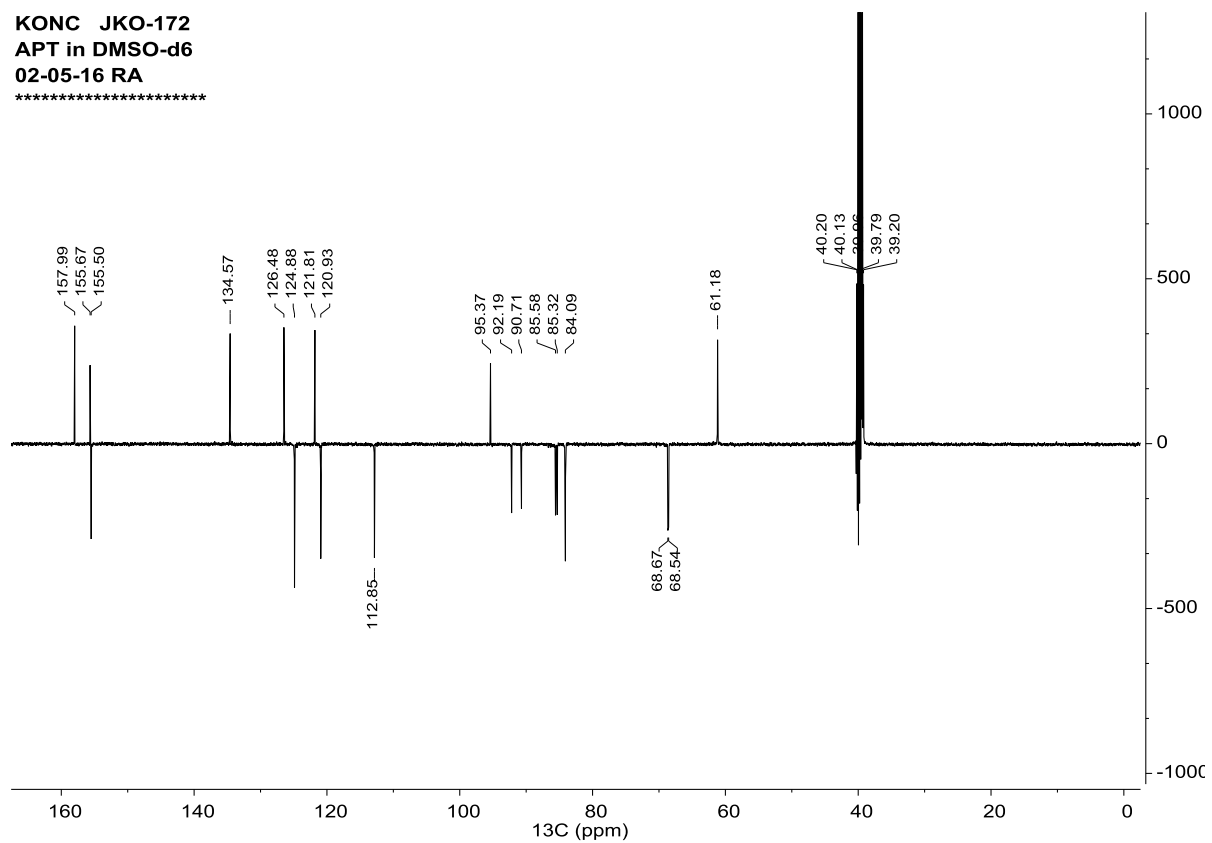

KONC JKO-172  
 19F NMR in DMSO-d6  
 03-05-16 RA  
 \*\*\*\*\*

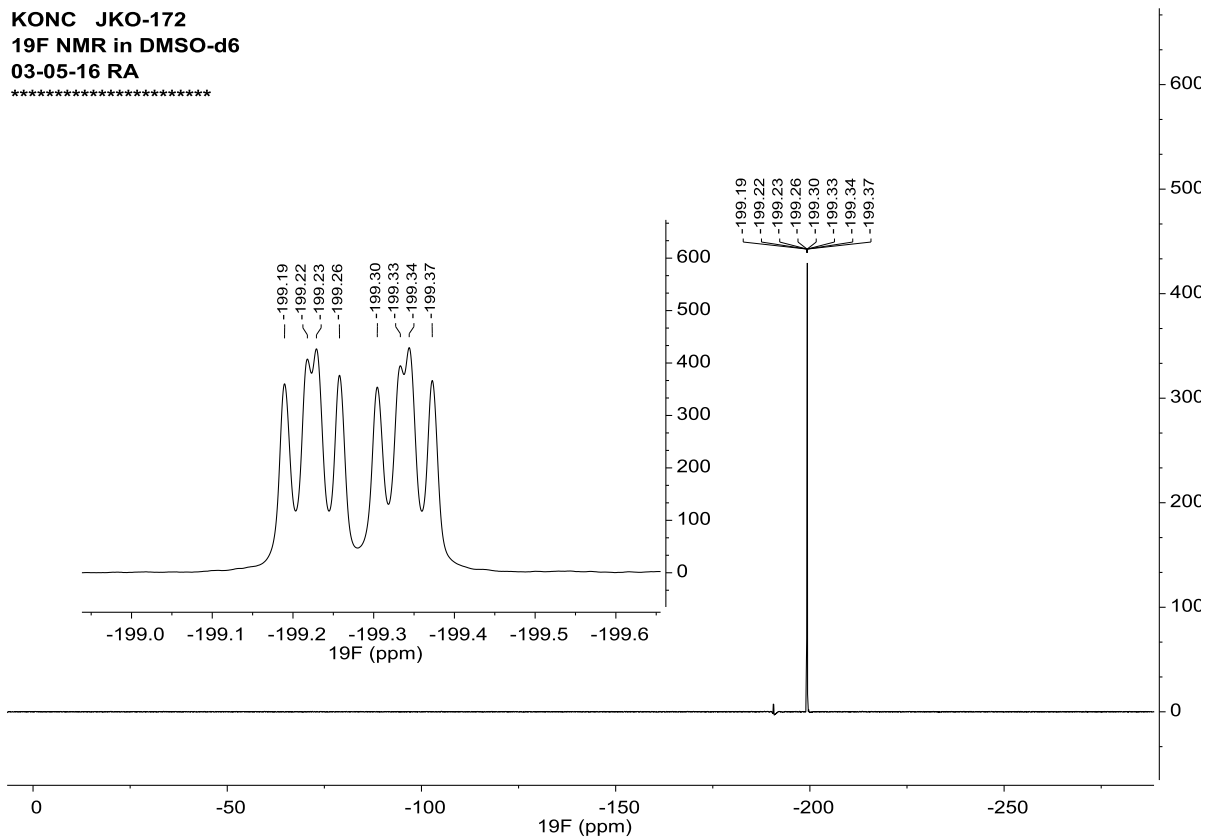

KONC JKO-158  
 1H NMR in DMSO-d6  
 29-04-16 RA  
 \*\*\*\*\*

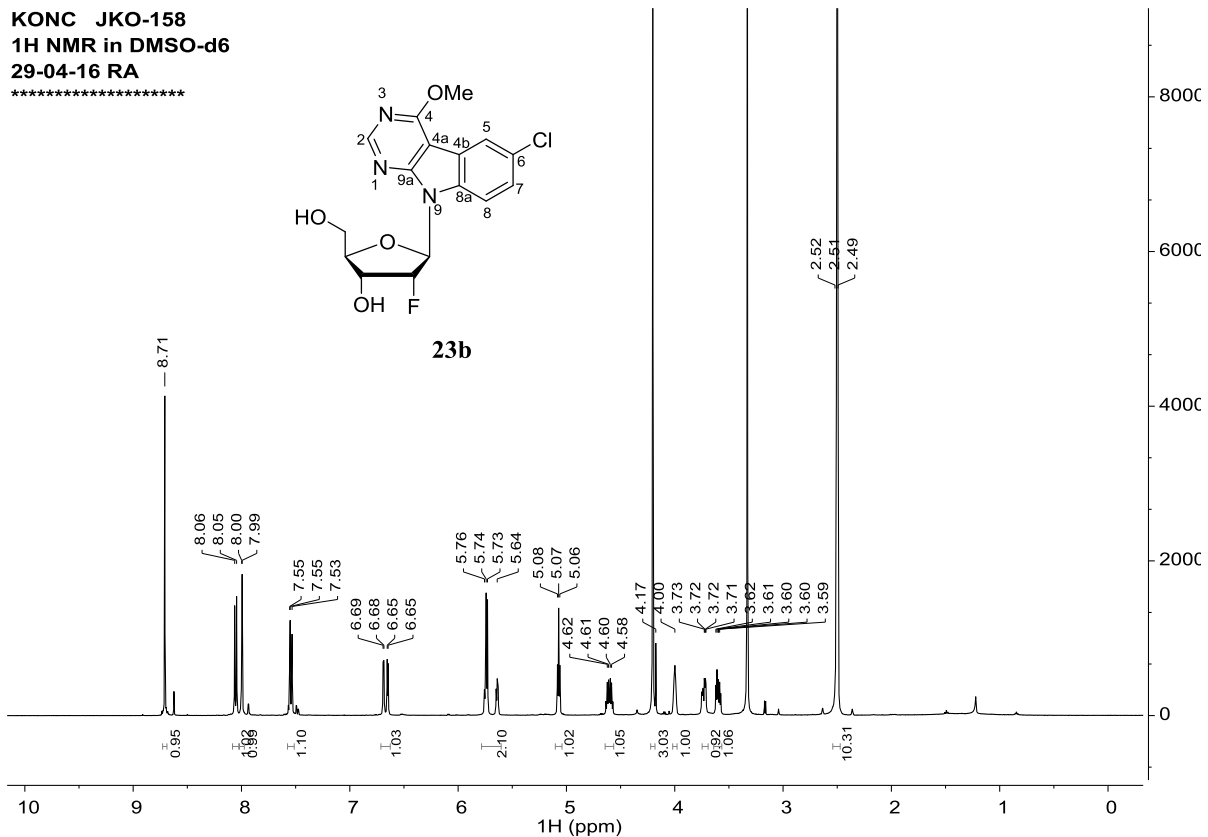

KONC JKO-158  
APT in DMSO-d6  
29-04-16 RA  
\*\*\*\*\*

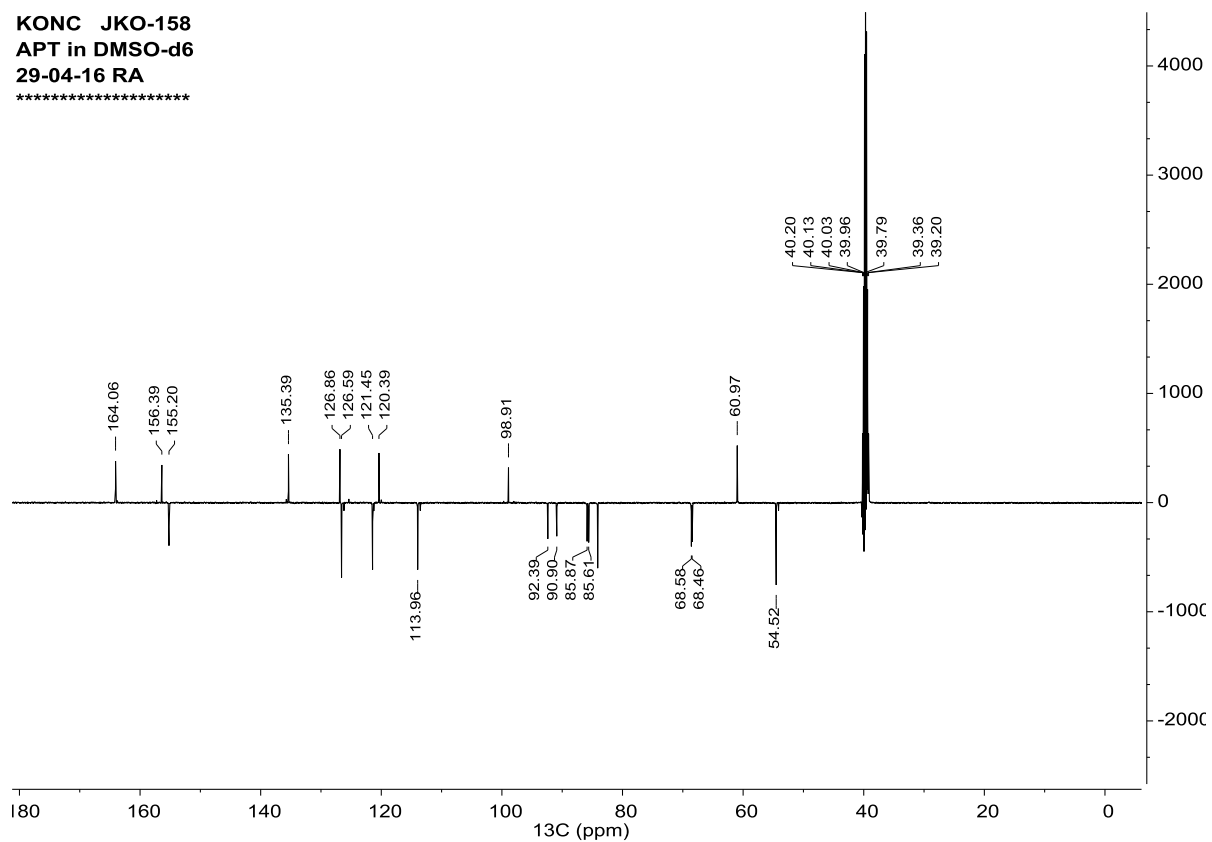

KONC JKO-158  
19F NMR in DMSO-d6  
02-05-16 RA  
\*\*\*\*\*

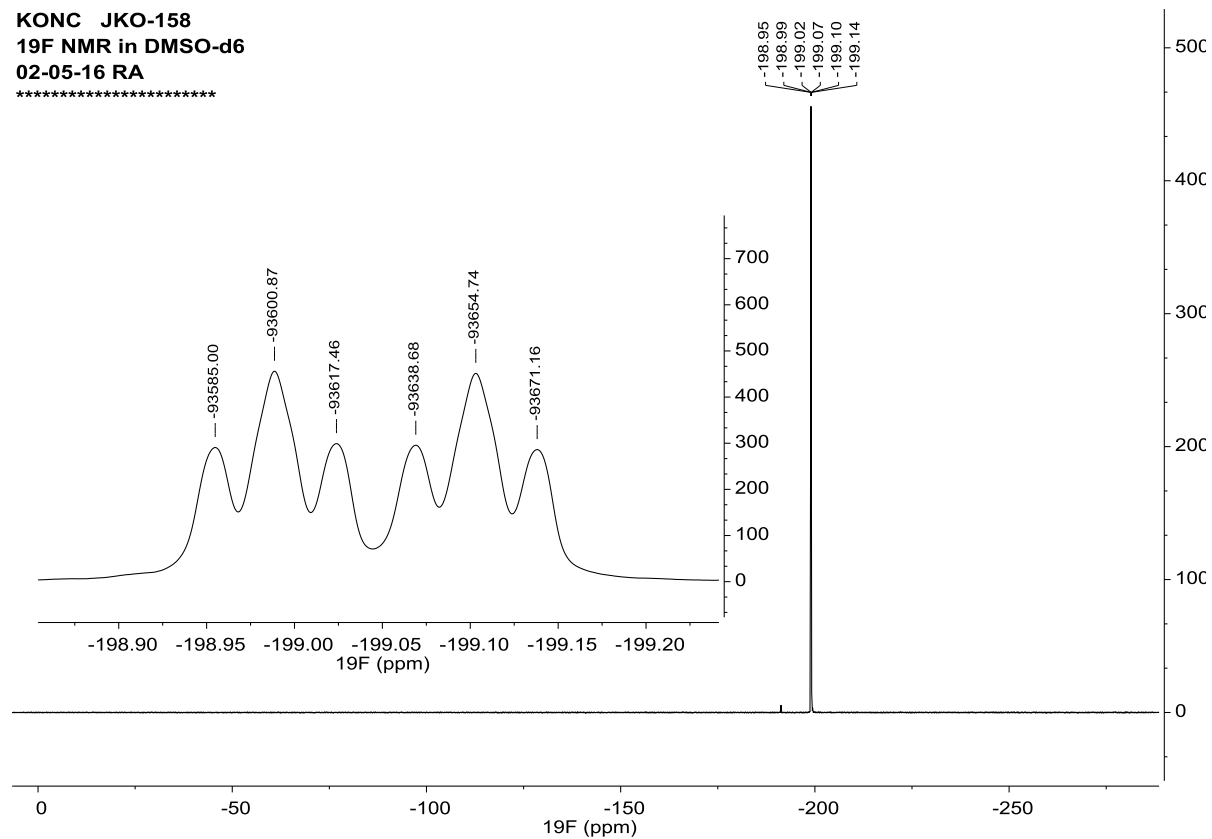

KONC JKO-159  
 1H NMR in DMSO-d6  
 02-05-16 RA  
 \*\*\*\*\*

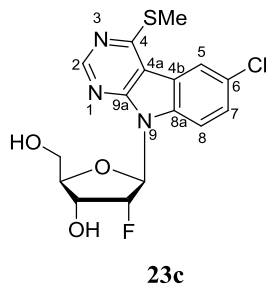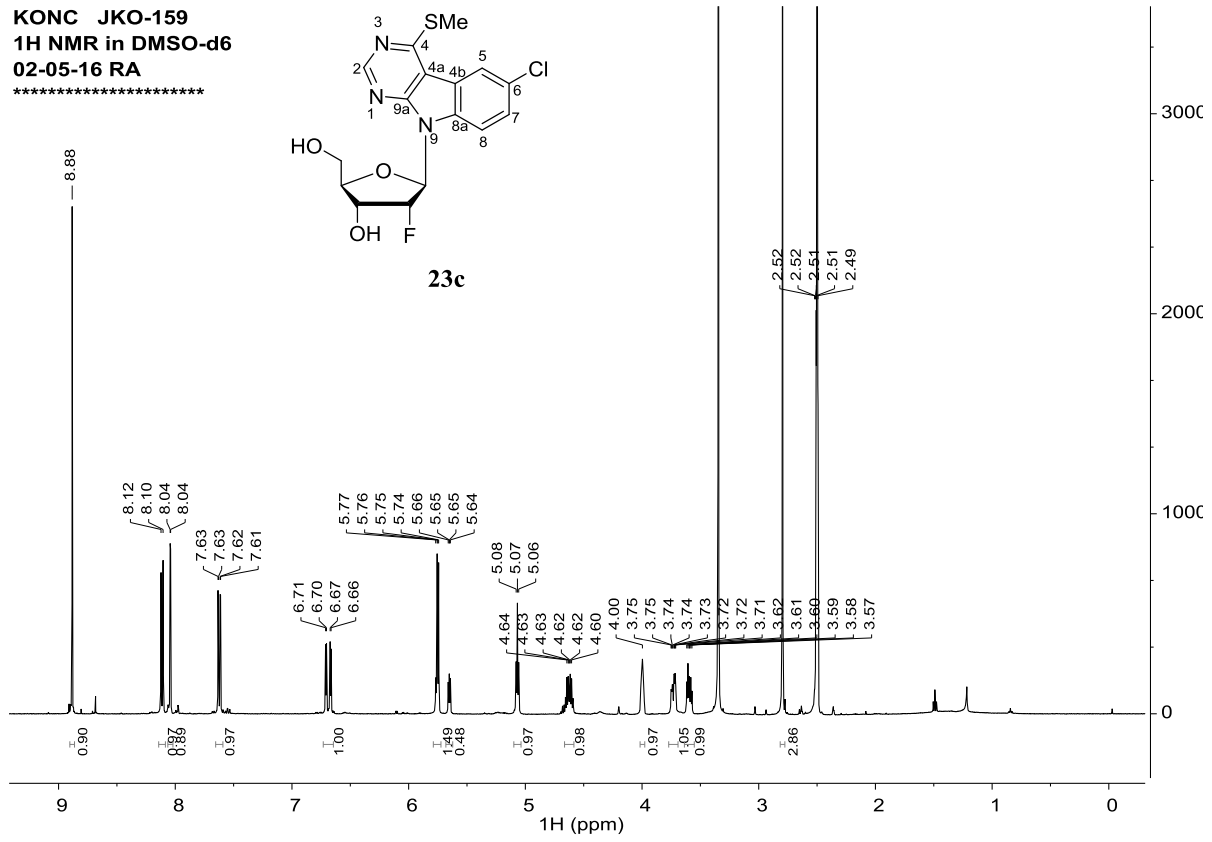

KONC JKO-159  
 APT in DMSO-d6  
 02-05-16 RA  
 \*\*\*\*\*

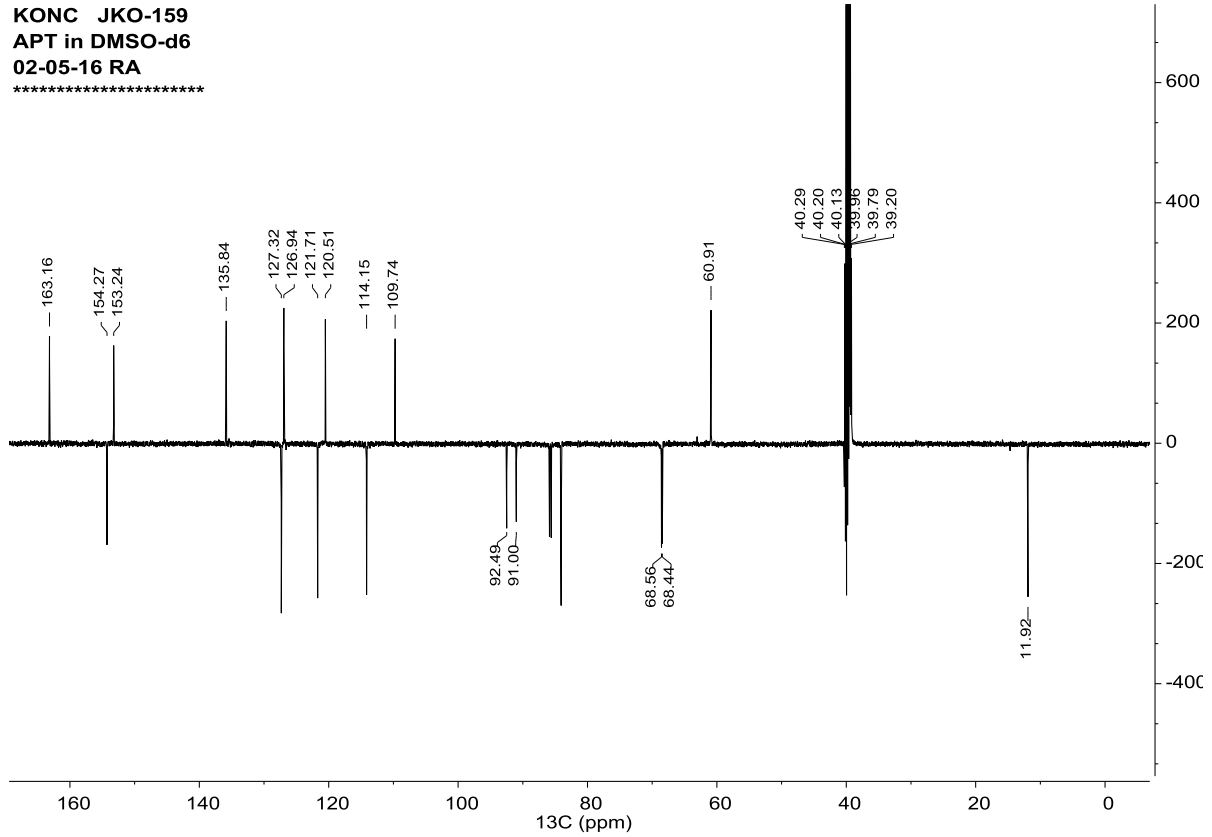

KONC JKO-159  
 19F NMR in DMSO-d6  
 02-05-16 RA  
 \*\*\*\*\*

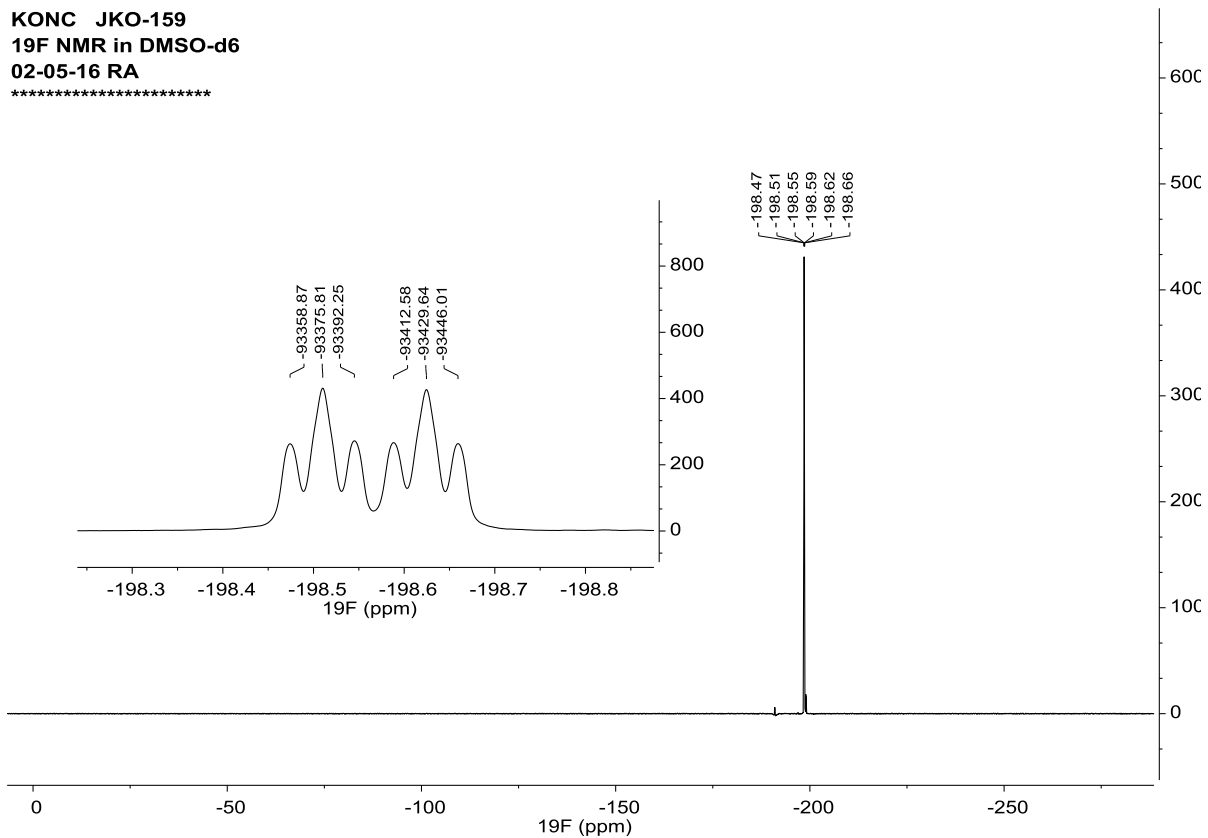

KONC JKO-160  
 1H NMR in DMSO-d6  
 02-05-16 RA  
 \*\*\*\*\*

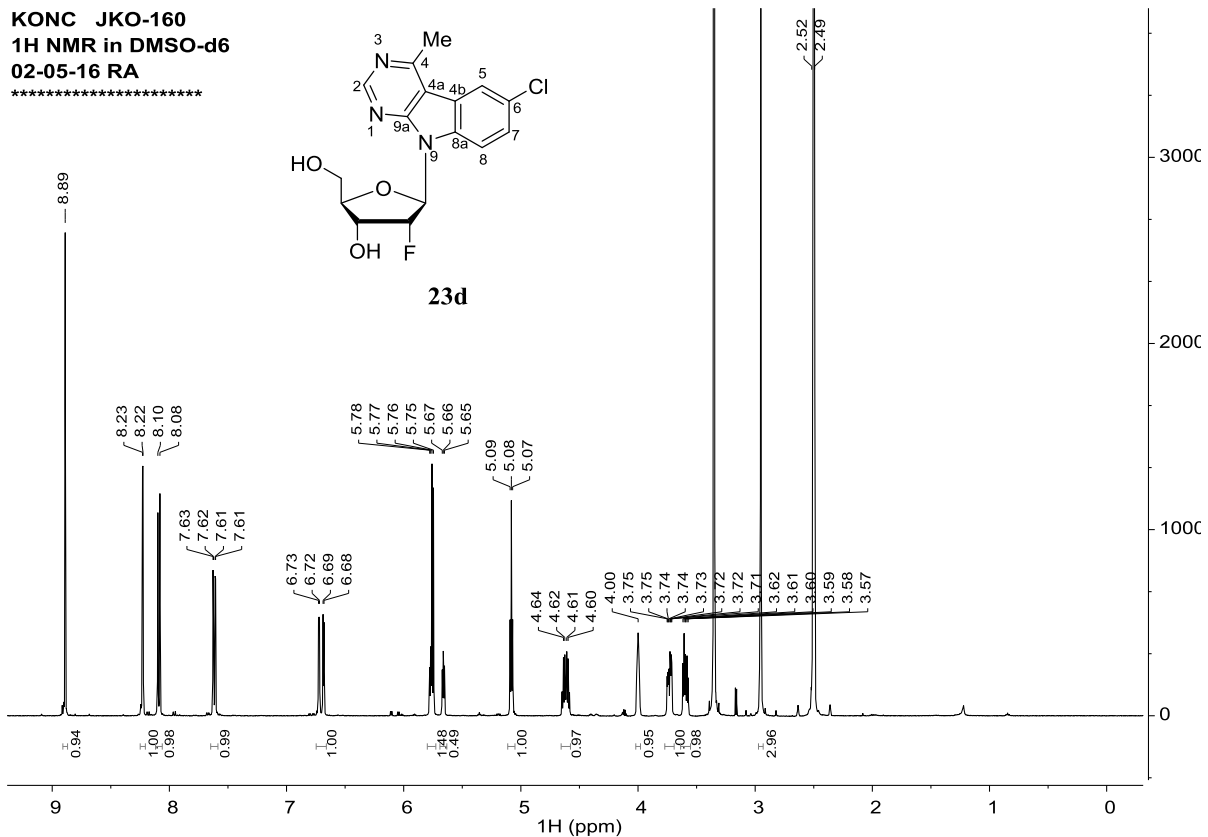



KONC JKO-160  
APT in DMSO-d6  
02-05-16 RA

\*\*\*\*\*

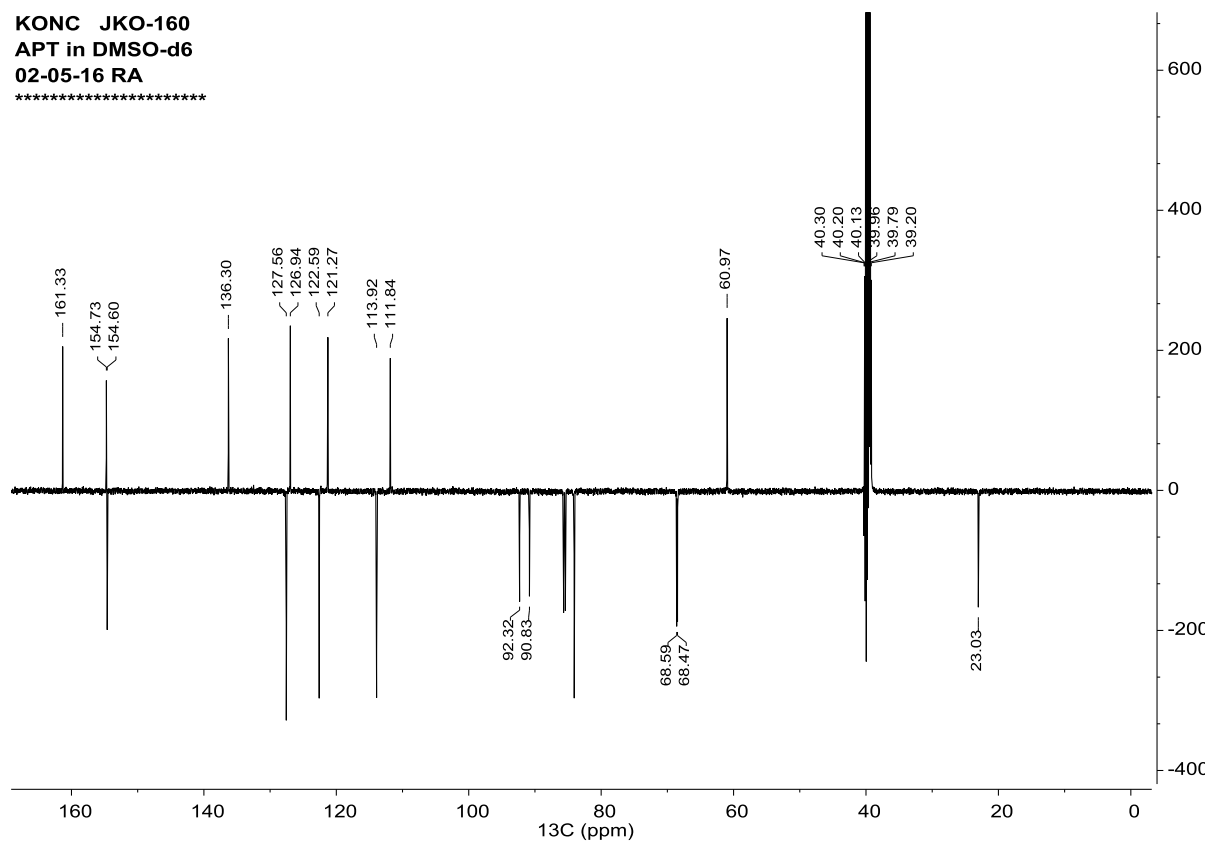

KONC JKO-160  
19F NMR in DMSO-d6  
02-05-16 RA

\*\*\*\*\*

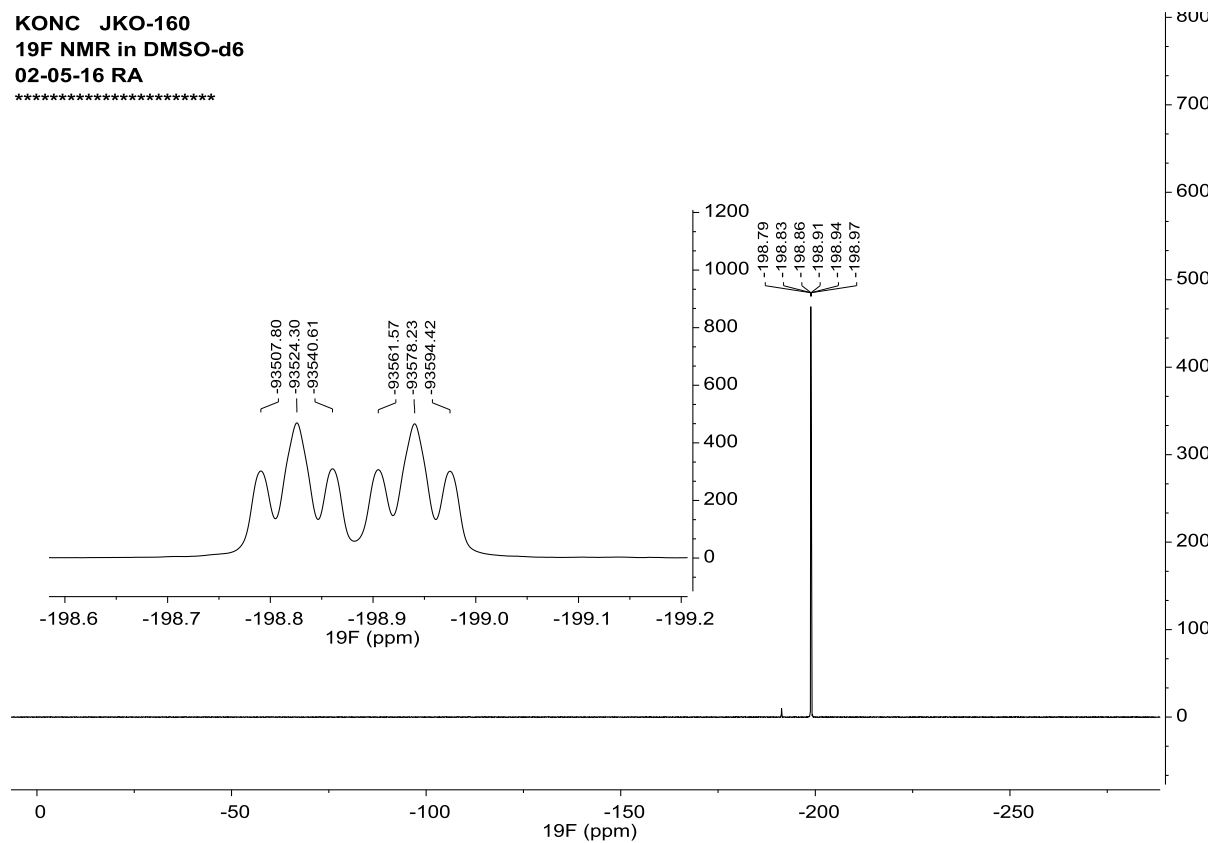

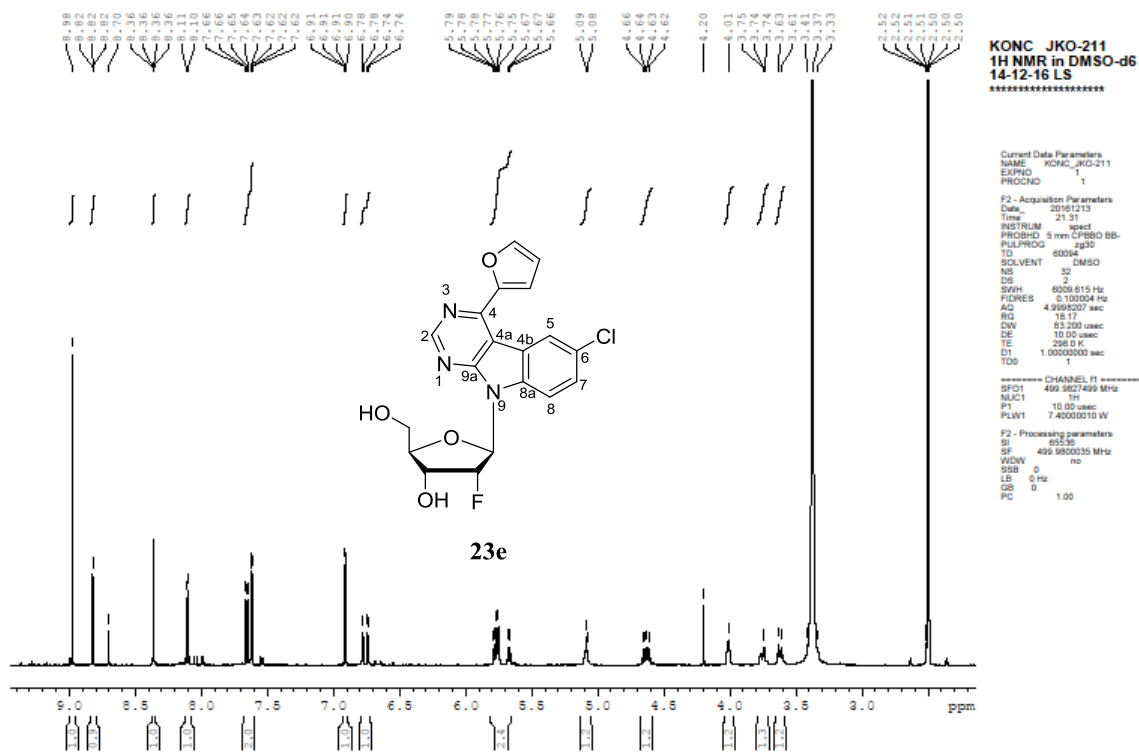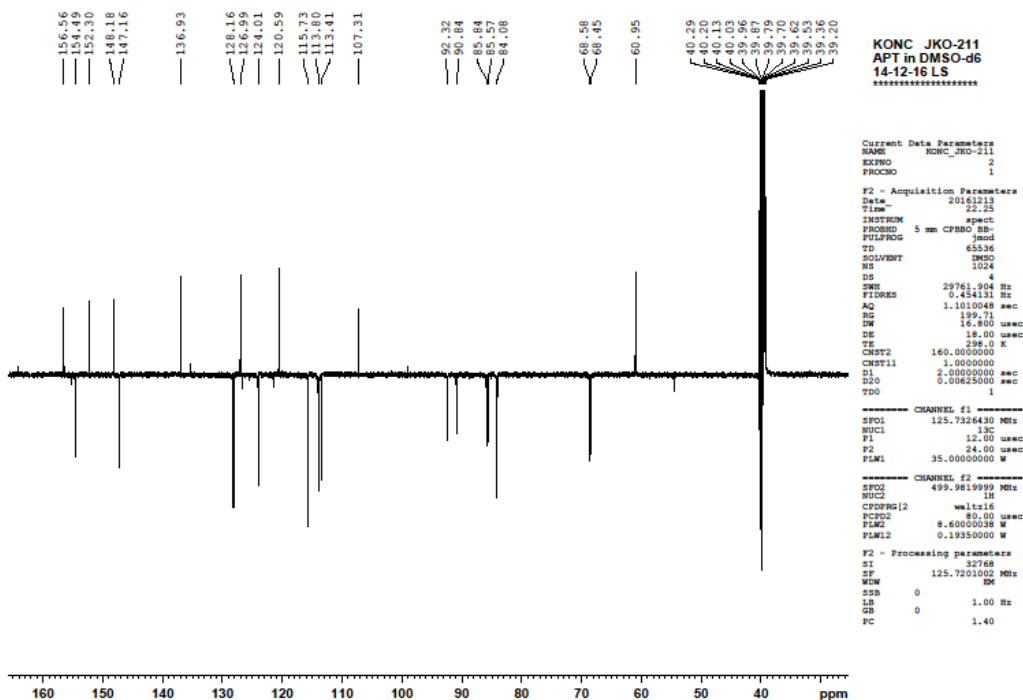

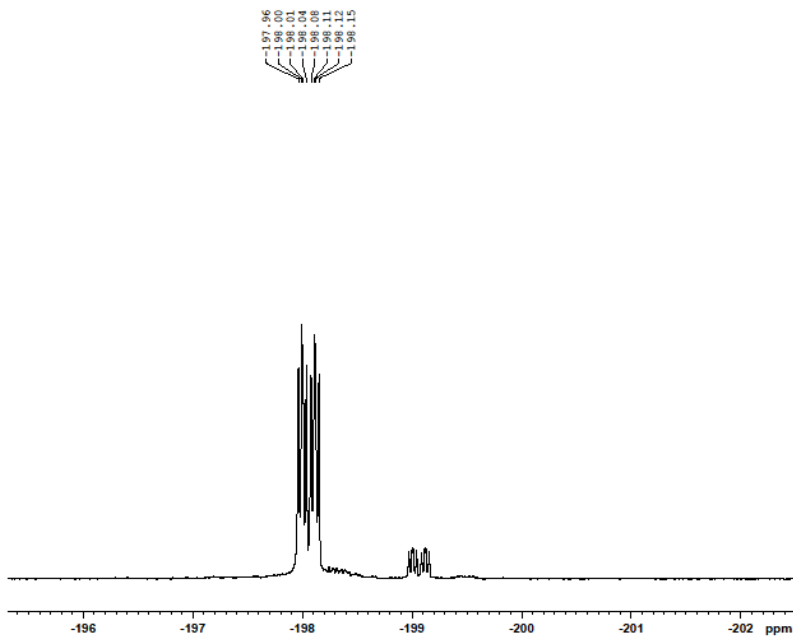

KONC\_JKO-211  
 19F NMR in DMSO-d6  
 19-12-16 RA  
 \*\*\*\*\*

Current Data Parameters  
 NAME KONC\_JKO-211  
 EXPNO 19  
 PROCNO 1

F2 - Acquisition Parameters  
 Date\_ 20161219  
 Time 13.35  
 INSTRUM spect  
 PROBHD 5 mm CPBBO BB-  
 PULPROG zgpg30  
 TD 27762  
 SOLVENT DMSO  
 NS 32  
 DS 0  
 SWH 138888.891 Hz  
 FIDRES 0.500026 Hz  
 AQ 0.999432 sec  
 RG 199.71  
 DW 3.400 usec  
 DE 18.00 usec  
 TE 300.0 K  
 D1 1.0000000 sec  
 TDO 1

----- CHANNEL f1 -----  
 SFO1 470.3632026 MHz  
 NUC1 19F  
 P1 15.00 usec  
 PLW1 6.40000010 W

F2 - Processing parameters  
 SI 52488  
 SF 470.4493301 MHz  
 WDW EM  
 SSB 0  
 LB 1.00 Hz  
 GB 0  
 PC 1.00

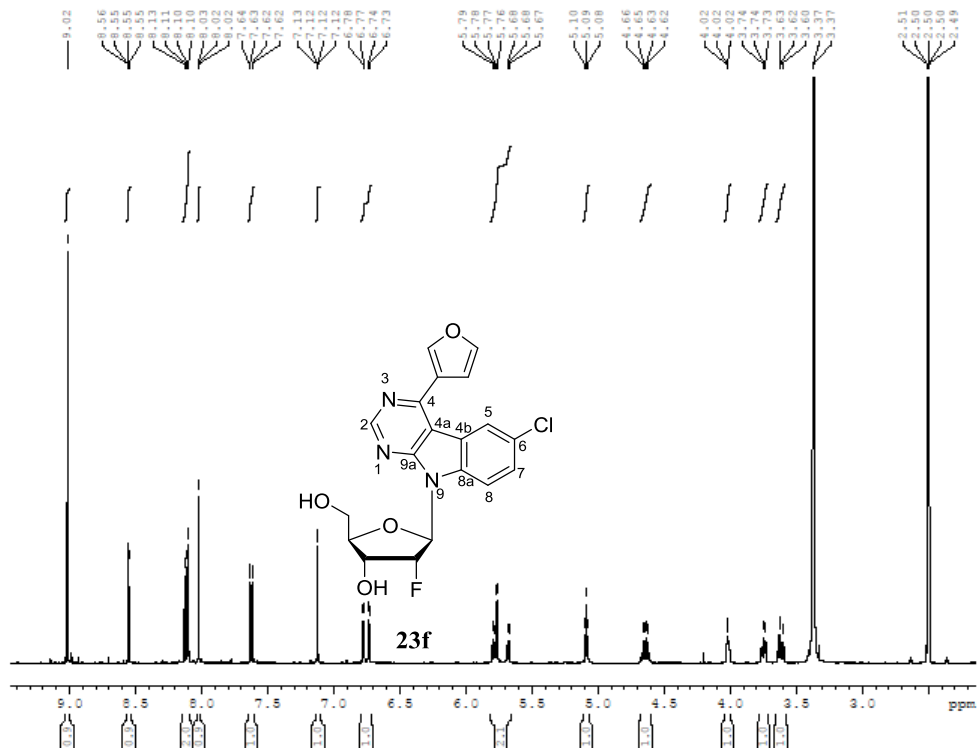

KONC\_JKO-209  
 1H NMR in DMSO-d6  
 14-12-16 LS  
 \*\*\*\*\*

Current Data Parameters  
 NAME KONC\_JKO-209  
 EXPNO 1  
 PROCNO 1

F2 - Acquisition Parameters  
 Date\_ 20161213  
 Time 17.28  
 INSTRUM spect  
 PROBHD 5 mm CPBBO BB-  
 PULPROG zg30  
 TD 60094  
 SOLVENT DMSO  
 NS 32  
 DS 2  
 SWH 6009.615 Hz  
 FIDRES 5.100004 Hz  
 AQ 4.9995207 sec  
 RG 115  
 DW 83.200 usec  
 DE 10.00 usec  
 TE 298.0 K  
 D1 1.0000000 sec  
 TDO 1

----- CHANNEL f1 -----  
 SFO1 499.9827499 MHz  
 NUC1 1H  
 P1 10.00 usec  
 PLW1 7.40000010 W

F2 - Processing parameters  
 SI 62535  
 SF 499.9850035 MHz  
 WDW no  
 SSB 0  
 LB 0 Hz  
 GB 0  
 PC 1.00

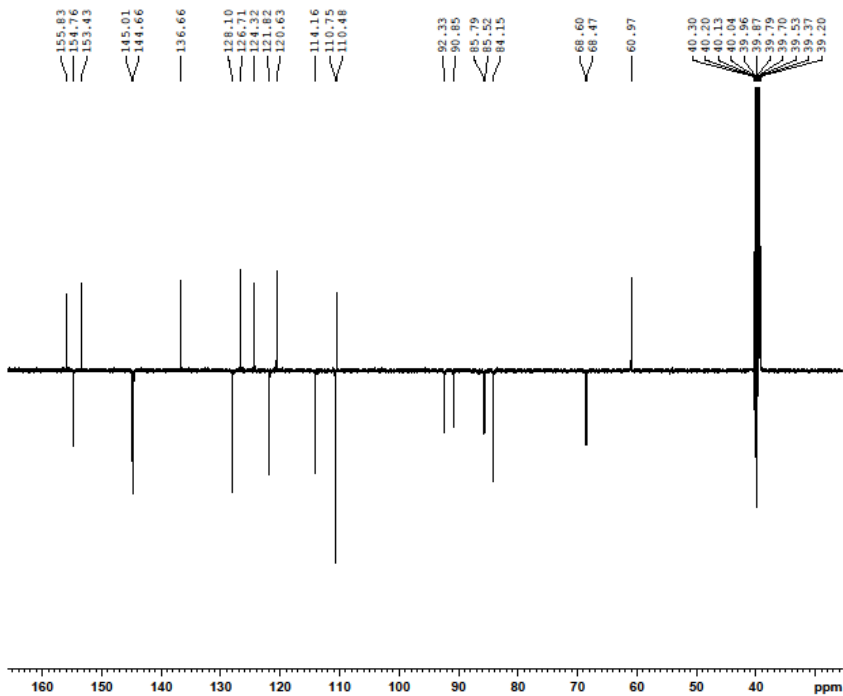

**KONC\_JKO-209**  
**APT in DMSO-d6**  
**14-12-16 LS**  
 \*\*\*\*\*

Current Data Parameters  
 NAME KONC\_JKO-209  
 EXPNO 2  
 PROCNO 1

F2 - Acquisition Parameters  
 Date\_ 20161213  
 Time\_ 18.31  
 INSTRUM spect  
 PROBHD 5 mm CPBBO BB-  
 PULPROG zgpg30  
 TO 65336  
 SOLVENT DMSO  
 NS 1024  
 DS 4  
 SWH 29761.904 Hz  
 FIDRES 0.454131 Hz  
 AQ 1.1010048 sec  
 RG 199.71  
 DW 16.800 usec  
 DE 18.00 usec  
 TE 298.0 K  
 CRYST2 160.0000000  
 D1 1.00000000  
 D2 2.00000000 sec  
 D3 0.00625000 sec  
 TDO 1

----- CHANNEL f1 -----  
 SFO1 125.7326430 MHz  
 NUC1 13C  
 P1 12.00 usec  
 P2 24.00 usec  
 PLW1 35.0000000 W

----- CHANNEL f2 -----  
 SFO2 499.9819999 MHz  
 NUC2 1H  
 CPOPRG2 waltz16  
 PCPD2 80.00 usec  
 PLW2 8.60000000 W  
 PLW12 0.19350000 W

F2 - Processing parameters  
 SI 65336  
 SF 125.7201009 MHz  
 WDW EM  
 SSB 0  
 LB 1.00 Hz  
 GB 0  
 PC 1.40

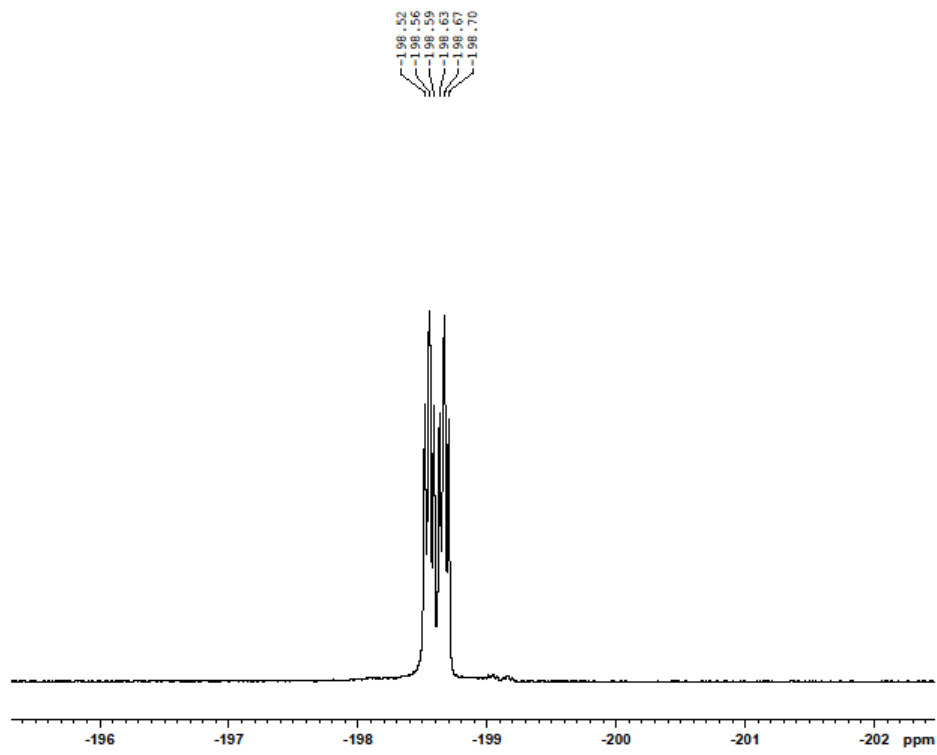

**KONC\_JKO-209**  
**13C NMR in DMSO-d6**  
**19-12-16 RA**  
 \*\*\*\*\*

Current Data Parameters  
 NAME KONC\_JKO-209  
 EXPNO 19  
 PROCNO 1

F2 - Acquisition Parameters  
 Date\_ 20161219  
 Time\_ 13.28  
 INSTRUM spect  
 PROBHD 5 mm CPBBO BB-  
 PULPROG zgpg30  
 TO 27762  
 SOLVENT DMSO  
 NS 32  
 DS 0  
 SWH 138888.891 Hz  
 FIDRES 0.500028 Hz  
 AQ 0.9999432 sec  
 RG 199.71  
 DW 3.600 usec  
 DE 18.00 usec  
 TE 298.0 K  
 D1 1.00000000 sec  
 TDO 1

----- CHANNEL f1 -----  
 SFO1 470.3830206 MHz  
 NUC1 13C  
 P1 15.00 usec  
 PLW1 6.40000010 W

F2 - Processing parameters  
 SI 524288  
 SF 470.4493301 MHz  
 WDW EM  
 SSB 0  
 LB 1.00 Hz  
 GB 0  
 PC 1.00

KONC JKO-161  
 1H NMR in DMSO-d6  
 02-05-16 RA  
 \*\*\*\*\*

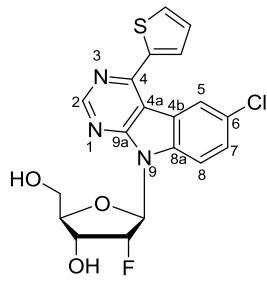

23g

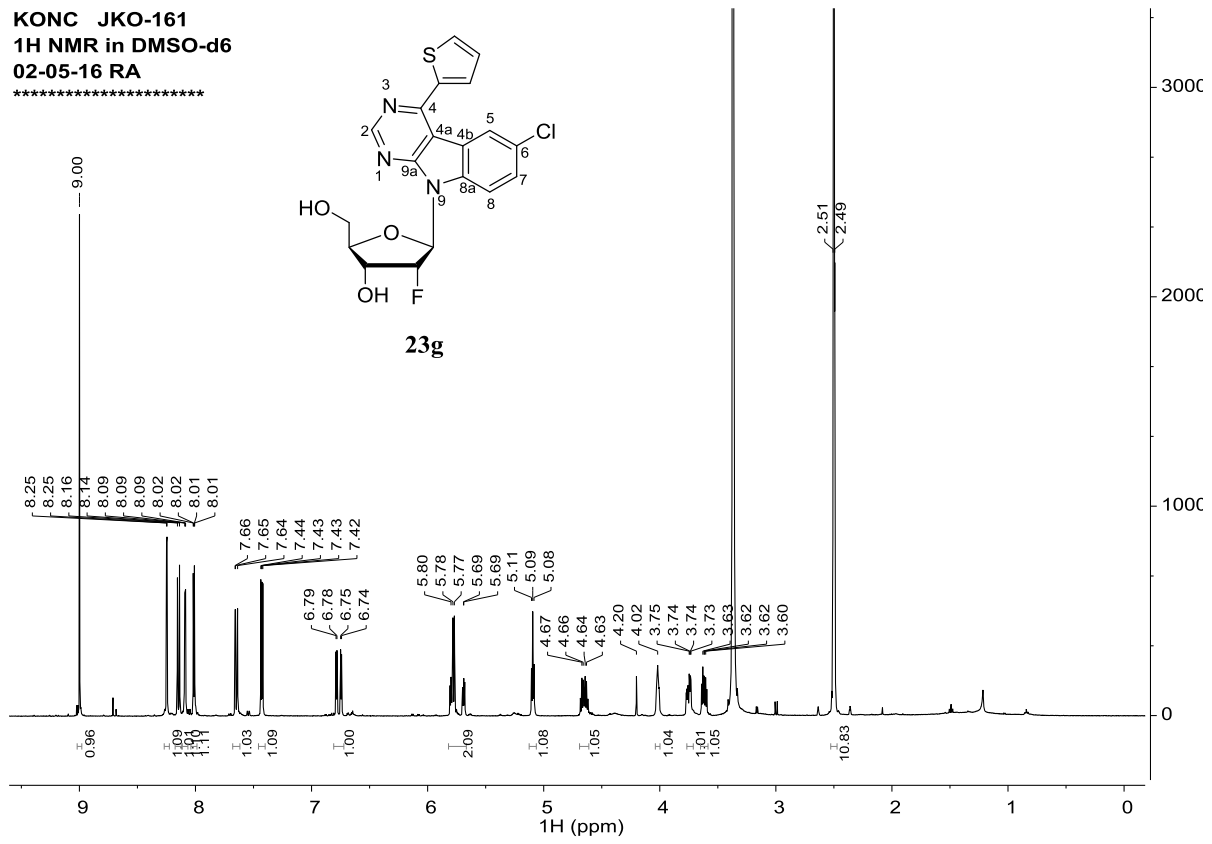

KONC JKO-161  
 APT in DMSO-d6  
 02-05-16 RA  
 \*\*\*\*\*

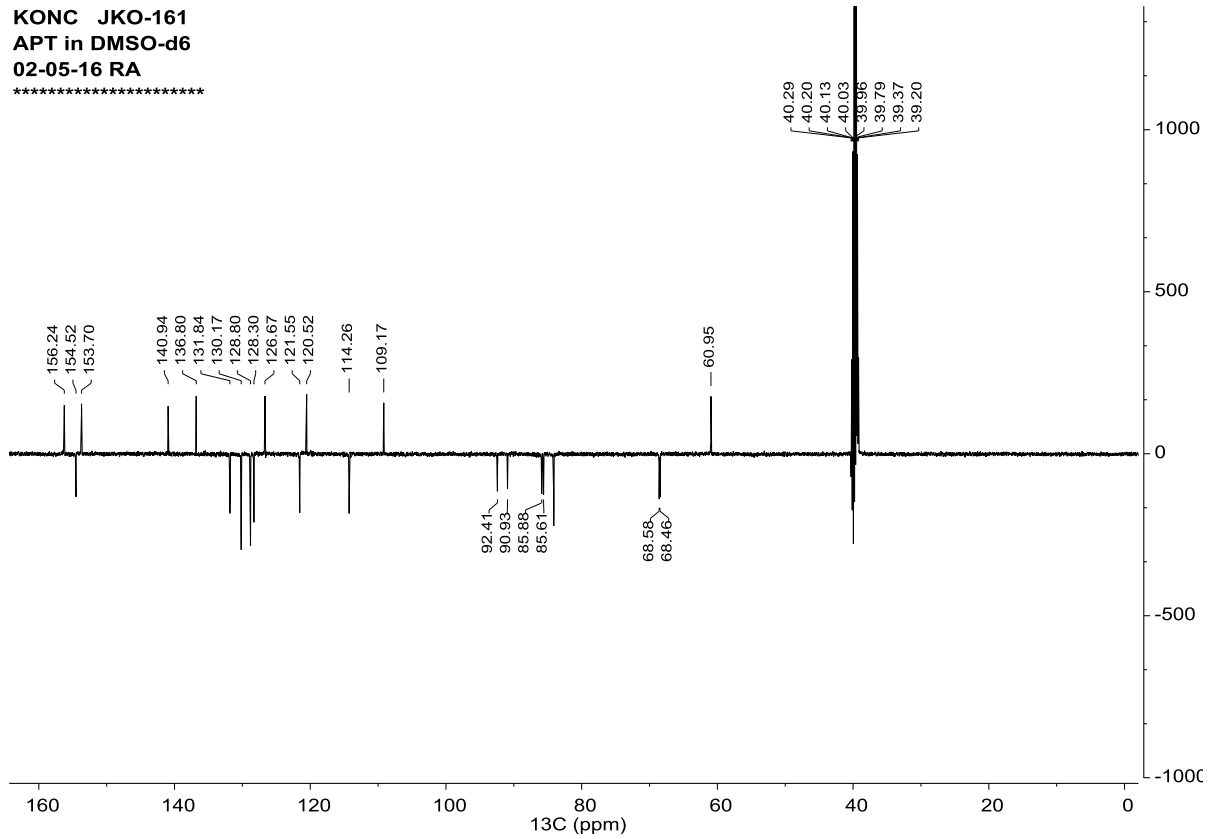

KONC JKO-161  
19F NMR in DMSO-d6  
02-05-16 RA  
\*\*\*\*\*

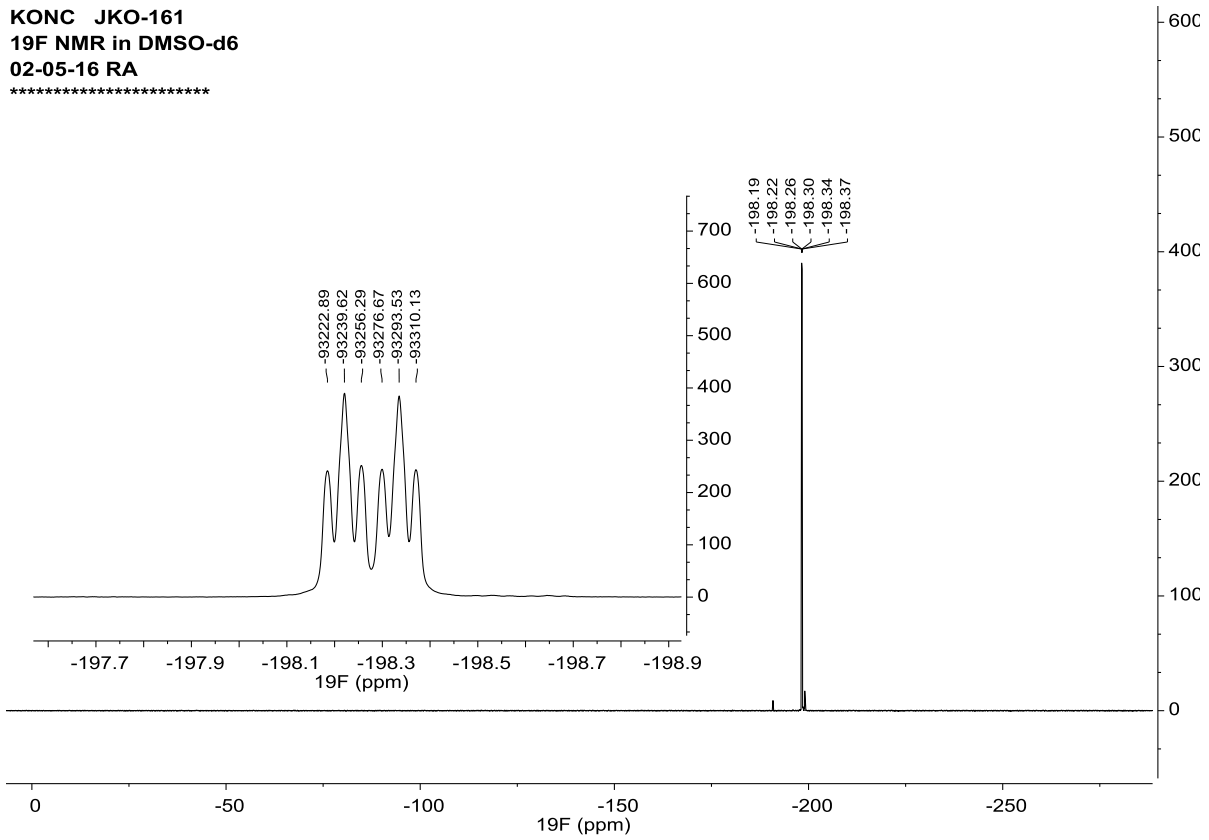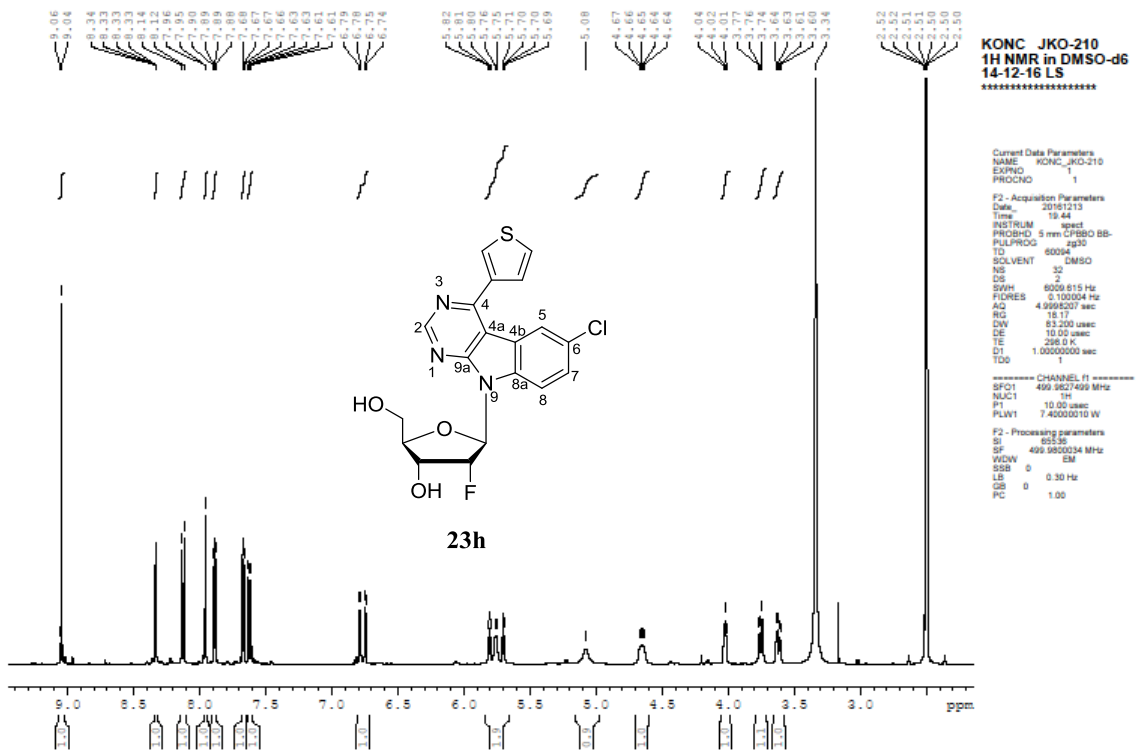

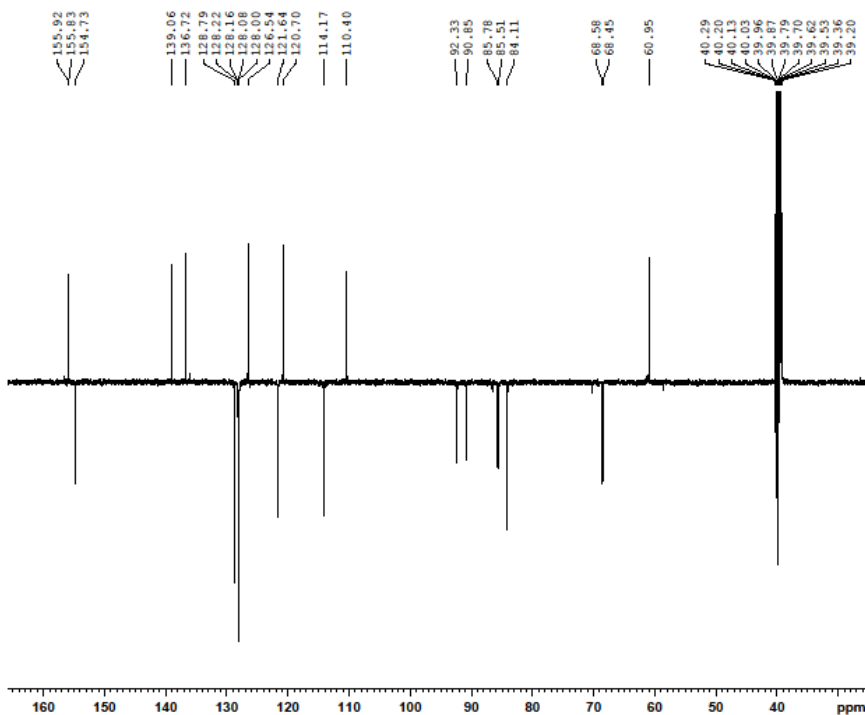

KONC JKO-210  
APT in DMSO-d6  
14-12-16 LS

```

Current Data Parameters
NAME      KONC_JKO-210
EXPNO     2
PROCNO    1

F2 - Acquisition Parameters
Date_     20161213
Time      20.38
INSTRUM   spect
PROBHD    5 mm CPBBO BB-
PULPROG   zgpg30
TD         65536
SOLVENT   DMSO
NS         1024
DS         4
SWH        29761.954 Hz
FIDRES     0.454131 Hz
AQ         1.1010048 sec
RG         199.71
DW         16.800 usec
DE         18.00 usec
TE         298.0 K
CHST2     160.0000000 W
CHST11    1.0000000
DI         2.00000000 sec
DQ         0.00625000 sec
TDO        1

----- CHANNEL f1 -----
SFO1      125.7326430 MHz
NUC1       13C
P1         12.00 usec
P2         24.00 usec
PLM1       35.0000000 W

----- CHANNEL f2 -----
SFO2      499.9419999 MHz
NUC2       1H
CPDPRG2   waltz16
PCPD2     80.00 usec
PULSE     8.60000038 W
PLM2       0.19350000 W

F2 - Processing parameters
SI         65536
SF         125.7201035 MHz
WDW        RM
SSB        0
LB         1.00 Hz
GB         0
PC         1.40

```

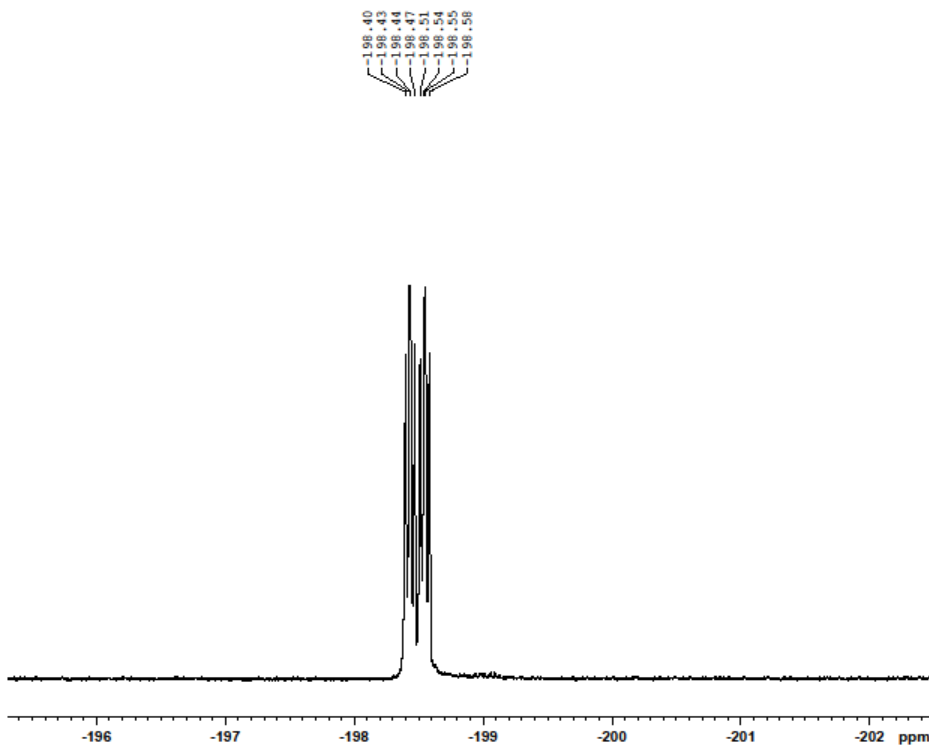

KONC JKO-210  
19F NMR in DMSO-d6  
19-12-16 RA

```

Current Data Parameters
NAME      KONC_JKO-210
EXPNO     19
PROCNO    1

F2 - Acquisition Parameters
Date_     20161219
Time      13.32
INSTRUM   spect
PROBHD    5 mm CPBBO BB-
PULPROG   zgpg30
TD         27762
SOLVENT   DMSO
NS         32
DS         0
SWH        138888.891 Hz
FIDRES     0.500028 Hz
AQ         0.9999432 sec
RG         199.71
DW         3.600 usec
DE         18.00 usec
TE         298.0 K
CHST2     1.00000000 sec
DQ         1

----- CHANNEL f1 -----
SFO1      470.3830206 MHz
NUC1       19F
P1         15.00 usec
PLM1       6.40000010 W

F2 - Processing parameters
SI         524288
SF         470.4493301 MHz
WDW        no
SSB        0
LB         0 Hz
GB         0
PC         1.00

```

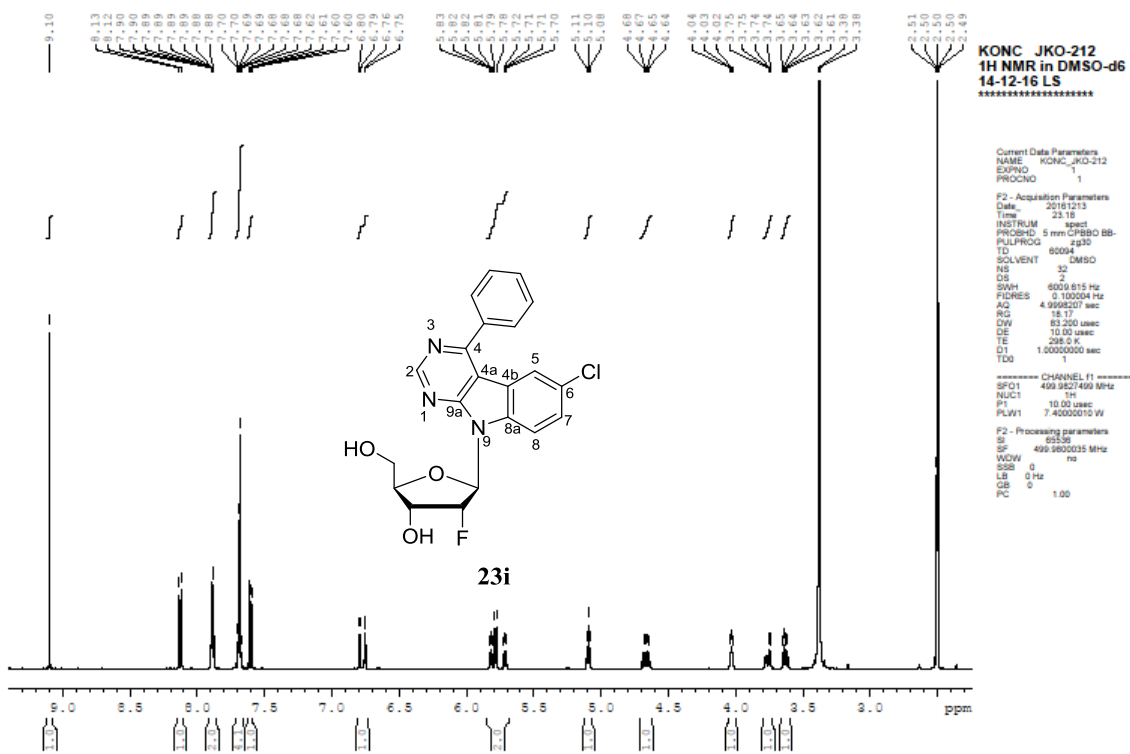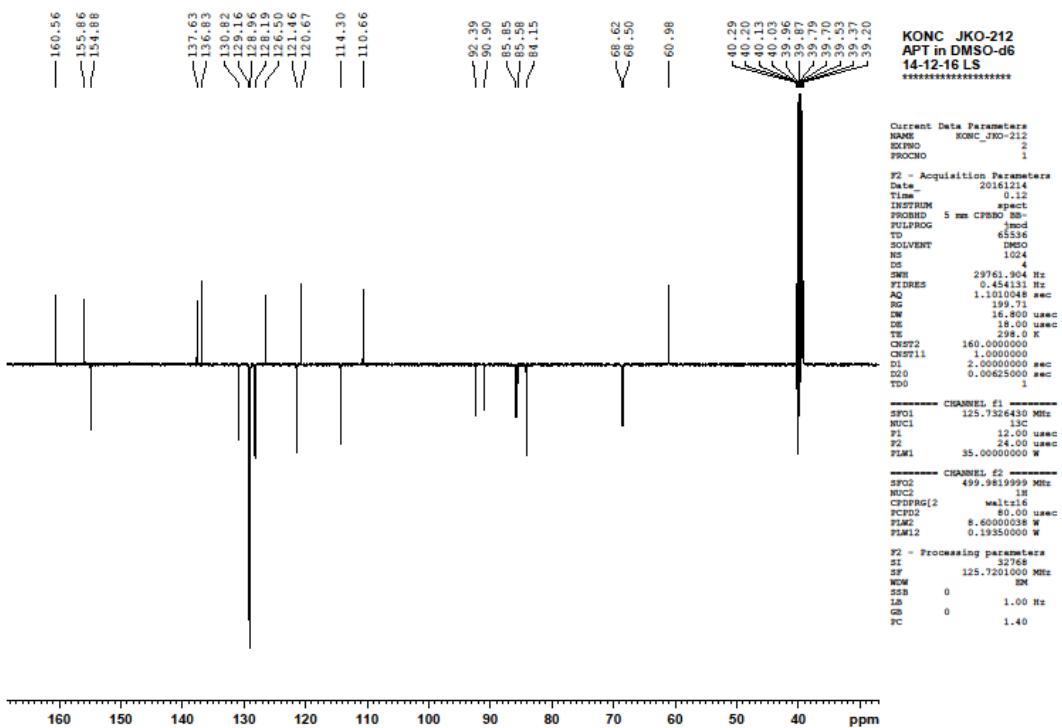



-198.36  
 -198.39  
 -198.40  
 -198.43  
 -198.47  
 -198.50  
 -198.51  
 -198.54

**KONC JKO-212**  
**19F NMR in DMSO-d6**  
**19-12-16 RA**  
 \*\*\*\*\*

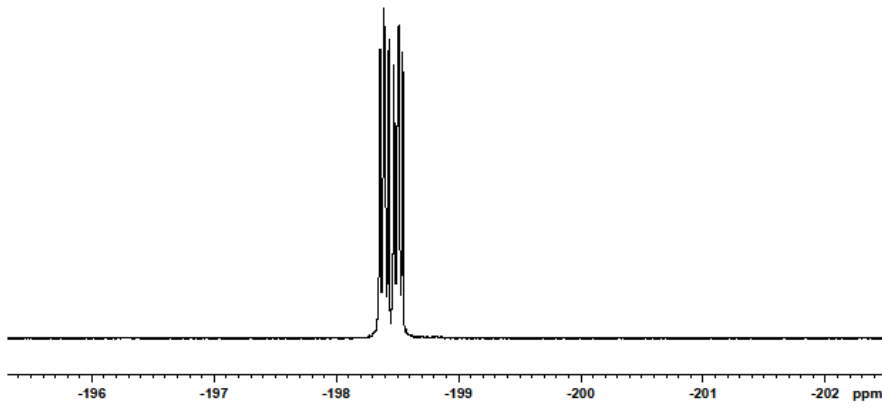

```

Current Data Parameters
NAME      KONC_JKO-212
EXPNO    19
PROCNO    1

F2 - Acquisition Parameters
Date_     20161219
Time      13.38
INSTRUM   spect
PROBHD    5 mm CPDQZ BB-
PULPROG   zgpg30
TD         277762
SOLVENT   DMSO
NS         32
DS         0
SWH        138888.891 Hz
FIDRES     0.500028 Hz
AQ         0.9999432 sec
RG         199.71
DW         3.600 usec
DE         18.00 usec
TE         298.0 K
D1         1.00000000 sec
TD0        1

----- CHANNEL f1 -----
SFO1      470.363206 MHz
NUC1       19F
P1         15.00 usec
PLM1       6.40000010 W

F2 - Processing parameters
SI         524288
SF         470.4493301 MHz
WDW        no
SSB        0
LB         0 Hz
GB         0
PC         1.00
  
```

- 
- 1) M. Tichý, R. Pohl, H. Y. Xu, Y. L. Chen, F. Yokokawa, P.-Y. Shi and M. Hocek, *Bioorg. Med. Chem.* **2012**, *20*, 6123–6133.
  - 2) C. H. Tann, P. R. Brodfuehrer, S. P. Brundidge, C. Sapino Jr. and H. G. Howell, *J. Org. Chem.* **1985**, *50*, 3644–3647.
  - 3) Y. A. Kim, A. Sharon, C. K. Chu, R. H. Rais, O. N. Al Safarjalani, F. N. M Naguib, and M. H. el Kouni, *J. Med. Chem.* **2008**, *51*, 3934–3945.
  - 4) M. Tichý, R. Pohl, E. Tloušť'ová, J. Weber, G. Bahador, Y. J. Lee and M. Hocek, *Bioorg. Med. Chem.* **2013**, *21*, 5362–5372.
  - 5) I. Mejdrová, D. Chalupská, M. Kögler, M. Šála, P. Plačková, A. Baumlová, H. Hřebabeký, E. Procházková, M. Dejmek, R. Guillon, D. Strunin, J. Weber, G. Lee, G. Birkus, H. Mertlíková-Kaiserová, E. Boura and R. Nencka, *J. Med. Chem.* **2015**, *58*, 3767–3793.
  - 6) J. Y. Feng, G. Cheng, J. Perry, O. Barauskas, Y. Xu, M. Fenaux, S. Eng, N. Tirunagari, B. Peng, M. Yu, Y. Tian, Y. J. Lee, G. Stepan, L. L. Lagpacan, D. Jin, M. Hung, K. S. Ku, B. Han, K. Kitrinos, M. Perron, G. Birkus, K. A. Wong, W. Zhong, C. U. Kim, A. Carey, A. Cho and A. S. Ray, *Antimicrob. Agents Chemother.* **2014**, *58*, 1930–1942.
  - 7) H. Yang, M. Robinson, A. C. Corsa, B. Peng, G. Cheng, Y. Tian, Y. Wang, R. Pakdaman, M. Shen, X. Qi, H. Mo, C. Tay, S. Krawczyk, X. C. Sheng, C. U. Kim, C. Yang and W. E. Delaney, *Antimicrob. Agents Chemother.* **2014**, *58*, 647–653.
  - 8) W. E. Delaney, R. Edwards, D. Colledge, T. Shaw, J. Torresi, T. G. Miller, H. C. Isom, C. T. Bock, M. P. Manns, C. Trautwein and S. Locarnini, *Antimicrob. Agents Chemother.* **2001**, *45*, 1705–1713.
  - 9) M. Perron, K. Stray, A. Kinkade, D. Theodore, G. Lee, E. Eisenberg, M. Sangi, B. E. Gilbert, R. Jordan, P. A. Piedra, G. L. Toms, R. Mackman and T. Cihlar, *Antimicrob. Agents Chemother.* **2016**, *60*, 1264–1273.
  - 10) T. C. Appleby, J. K. Perry, E. Murakami, O. Barauskas, J. Feng, A. Cho, D. Fox, D. R. Wetmore, M. E. McGrath, A. S. Ray, M. J. Sofia, S. Swaminathan, T. E. Edwards, *Science* 2015, **347**, 771–775.
  - 11) P. R. Gerber, K. J. Müller, *Comput.-Aided Mol. Des.* 1995, **9**, 251–268.
